# Supplementary material for: Prognostic role of chemokine-related genes in acute myeloid leukemia
Source: PeerJ journal article supplement (doi:10.7717/peerj.17862), 2024-08-09
Supplement: Data_processing.xls [file Data_processing.xls]

## Sheet: 1.PCRInspection overall plan
number	group	Sample number	Sample information	remark	Detection gene
1	Control	Control1	6		CCL4
2	Control	Control2	7		CCL20
3	Control	Control3	8		CCR2
4	Control	Control4	9		CXCR2
5	Control	Control5	10		CXCR3
6	AML	AML2	1		CXCR6
7	AML	AML3	2
8	AML	AML4	3
9	AML	AML5	4
10	AML	AML6	5
Board 1
	1	2	3	4	5	6	7	8	9	10	11	12
A
B
C
D
E	CCL4+ 1	CCL4+ 1	CCL4+ 1	CXCR3 + 1	CXCR3 + 1	CXCR3 + 1	CCL4+ 2	CCL4+ 2	CCL4+ 2	CXCR3 + 2	CXCR3 + 2	CXCR3 + 2
F	CCL20 + 1	CCL20 + 1	CCL20 + 1	CXCR6+1	CXCR6+1	CXCR6+1	CCL20 + 2	CCL20 + 2	CCL20 + 2	CXCR6+2	CXCR6+2	CXCR6+2
G	CCR2+ 1	CCR2+ 1	CCR2+ 1	GAPDH + 1	GAPDH + 1	GAPDH + 1	CCR2+ 2	CCR2+ 2	CCR2+ 2	GAPDH + 2	GAPDH + 2	GAPDH + 2
H	CXCR2+ 1	CXCR2+ 1	CXCR2+ 1				CXCR2+ 2	CXCR2+ 2	CXCR2+ 2
Board 2
	1	2	3	4	5	6	7	8	9	10	11	12
A	CCL4+ 3	CCL4+ 3	CCL4+ 3	CCL4+ 4	CCL4+ 4	CCL4+ 4	CCL4+ 5	CCL4+ 5	CCL4+ 5	CCL4+ 6	CCL4+ 6	CCL4+ 6
B	CCL20 + 3	CCL20 + 3	CCL20 + 3	CCL20 + 4	CCL20 + 4	CCL20 + 4	CCL20 + 5	CCL20 + 5	CCL20 + 5	CCL20 + 6	CCL20 + 6	CCL20 + 6
C	CCR2+ 3	CCR2+ 3	CCR2+ 3	CCR2+ 4	CCR2+ 4	CCR2+ 4	CCR2+ 5	CCR2+ 5	CCR2+ 5	CCR2+ 6	CCR2+ 6	CCR2+ 6
D	CXCR2+ 3	CXCR2+ 3	CXCR2+ 3	CXCR2+ 4	CXCR2+ 4	CXCR2+ 4	CXCR2+ 5	CXCR2+ 5	CXCR2+ 5	CXCR2+ 6	CXCR2+ 6	CXCR2+ 6
E	CXCR3 + 3	CXCR3 + 3	CXCR3 + 3	CXCR3 + 4	CXCR3 + 4	CXCR3 + 4	CXCR3 + 5	CXCR3 + 5	CXCR3 + 5	CXCR3 + 6	CXCR3 + 6	CXCR3 + 6
F	CXCR6+3	CXCR6+3	CXCR6+3	CXCR6+4	CXCR6+4	CXCR6+4	CXCR6+5	CXCR6+5	CXCR6+5	CXCR6+6	CXCR6+6	CXCR6+6
G	GAPDH + 3	GAPDH + 3	GAPDH + 3	GAPDH + 4	GAPDH + 4	GAPDH + 4	GAPDH + 5	GAPDH + 5	GAPDH + 5	GAPDH + 6	GAPDH + 6	GAPDH + 6
H
Board3
	1	2	3	4	5	6	7	8	9	10	11	12
A	CCL4+ 7	CCL4+ 7	CCL4+ 7	CCL4+ 8	CCL4+ 8	CCL4+ 8	CCL4+ 9	CCL4+ 9	CCL4+ 9	CCL4+ 10	CCL4+ 10	CCL4+ 10
B	CCL20 + 7	CCL20 + 7	CCL20 + 7	CCL20 + 8	CCL20 + 8	CCL20 + 8	CCL20 + 9	CCL20 + 9	CCL20 + 9	CCL20 + 10	CCL20 + 10	CCL20 + 10
C	CCR2+ 7	CCR2+ 7	CCR2+ 7	CCR2+ 8	CCR2+ 8	CCR2+ 8	CCR2+ 9	CCR2+ 9	CCR2+ 9	CCR2+ 10	CCR2+ 10	CCR2+ 10
D	CXCR2+ 7	CXCR2+ 7	CXCR2+ 7	CXCR2+ 8	CXCR2+ 8	CXCR2+ 8	CXCR2+ 9	CXCR2+ 9	CXCR2+ 9	CXCR2+ 10	CXCR2+ 10	CXCR2+ 10
E	CXCR3 + 7	CXCR3 + 7	CXCR3 + 7	CXCR3 + 8	CXCR3 + 8	CXCR3 + 8	CXCR3 + 9	CXCR3 + 9	CXCR3 + 9	CXCR3 + 10	CXCR3 + 10	CXCR3 + 10
F	CXCR6+7	CXCR6+7	CXCR6+7	CXCR6+8	CXCR6+8	CXCR6+8	CXCR6+9	CXCR6+9	CXCR6+9	CXCR6+10	CXCR6+10	CXCR6+10
G	GAPDH + 7	GAPDH + 7	GAPDH + 7	GAPDH + 8	GAPDH + 8	GAPDH + 8	GAPDH + 9	GAPDH + 9	GAPDH + 9	GAPDH + 10	GAPDH + 10	GAPDH + 10
H

## Sheet: 2.Expansion curve Dissolve curv
Board1
	1	2	3	4	5	6	7	8	9	10	11	12
A
B
C
D
E	20.5355	20.4767	20.3586	21.8328	21.9905	21.8394	21.3372	21.3794	21.4779	23.5784	23.422	23.6906
F	22.853	22.3653	22.4135	32.5905	32.5127	32.824	22.2798	22.3603	22.4285	32.5644	32.9404	32.7477
G	19.1967	19.3032	19.3204	19.2024	19.279	19.1618	21.9473	22.0988	22.1157	19.4426	19.4974	19.9995
H	29.7253	29.4722	29.8035				29.4723	29.5113	29.654
Board2
	1	2	3	4	5	6	7	8	9	10	11	12
A	21.0032	21.113	20.9007	21.7932	21.8404	21.7005	21.3412	21.2243	21.2434	21.7252	21.5619	21.5452
B	22.1728	22.1108	22.0903	22.4679	22.4266	22.4672	22.1761	22.3008	22.1385	22.9391	22.9488	22.8111
C	19.9371	19.8595	19.8494	21.4025	20.2906	20.3105	19.3427	19.5299	19.4686	27.8175	23.2343	22.2701
D	27.5131	27.2296	27.1575	27.4558	27.9893	27.659	27.0645	26.0717	27.2072	29.9331	29.6956	29.8545
E	22.8954	22.8876	22.8692	23.4594	23.2995	23.2647	23.6291	23.5552	23.7562	23.7852	23.7368	23.8055
F	29.4365	29.8072	29.3354	30.3687	30.4889	30.7631	29.055	29.3731	29.1827	30.7324	30.6652	30.8888
G	19.2062	19.1639	19.0824	19.7302	19.5233	19.4319	18.6994	18.7877	19.034	19.3543	19.3008	19.0714
H
Board3
	1	2	3	4	5	6	7	8	9	10	11	12
A	20.9004	20.8264	20.8477	20.0048	20.4122	20.0678	22.0831	22.06	22.172	23.9238	23.7777	23.7732
B	21.725	21.9893	21.8774	21.5776	21.0664	21.6614	22.8481	22.9921	22.8603	23.968	23.9188	23.8068
C	20.1984	20.0596	20.2259	19.9449	19.8528	20.0425	21.1122	21.0028	21.0923	21.4875	21.4578	21.6918
D	27.421	28.4357	28.3261	26.1304	26.3185	26.8471	27.1635	27.7745	27.0603	28.9446	28.7257	28.8331
E	23.1664	23.1931	23.0834	22.9249	23.0149	22.6528	24.3675	24.3551	24.5929	25.7636	25.64	25.5907
F	30.8053	30.7896	30.9016	28.7011	28.8993	28.7356	30.2834	30.7611	30.3676	31.7093	31.5264	31.4301
G	18.1398	18.0252	17.9458	17.7893	17.9302	17.8173	18.5465	19.0406	18.7237	20.2411	20.1664	20.1278
H
						CCL4
						CCL20
						CCR2
						CXCR2
						CXCR3
						CXCR6
						GAPDH

## Sheet: 3.Data processing
sample	CCL4			CCL20			CCR2			CXCR2			CXCR3			CXCR6				H-GAPDH①				Intrinsic mean
Control1	20.5355	20.4767	20.3586	22.853	22.3653	22.4135	19.1967	19.3032	19.3204	29.7253	29.4722	29.8035	21.8328	21.9905	21.8394	32.5905	32.5127	32.824		19.2024	19.279	19.1618		19.2144
Control2	21.3372	21.3794	21.4779	22.2798	22.3603	22.4285	21.9473	22.0988	22.1157	29.4723	29.5113	29.654	23.5784	23.422	23.6906	32.5644	32.9404	32.7477		19.4426	19.4974	19.9995		19.6465
Control3	21.0032	21.113	20.9007	22.1728	22.1108	22.0903	19.9371	19.8595	19.8494	27.5131	27.2296	27.1575	22.8954	22.8876	22.8692	29.4365	29.8072	29.3354		19.2062	19.1639	19.0824		19.1509
Control4	21.7932	21.8404	21.7005	22.4679	22.4266	22.4672	21.4025	20.2906	20.3105	27.4558	27.9893	27.659	23.4594	23.2995	23.2647	30.3687	30.4889	30.7631		19.7302	19.5233	19.4319		19.5618
Control5	21.3412	21.2243	21.2434	22.1761	22.3008	22.1385	19.3427	19.5299	19.4686	27.0645	26.0717	27.2072	23.6291	23.5552	23.7562	29.055	29.3731	29.1827		18.6994	18.7877	19.034		18.8404
AML1	21.7252	21.5619	21.5452	22.9391	22.9488	22.8111	27.8175	23.2343	22.2701	29.9331	29.6956	29.8545	23.7852	23.7368	23.8055	30.7324	30.6652	30.8888		19.3543	19.3008	19.0714		19.2422
AML2	20.9004	20.8264	20.8477	21.725	21.9893	21.8774	20.1984	20.0596	20.2259	27.421	28.4357	28.3261	23.1664	23.1931	23.0834	30.8053	30.7896	30.9016		18.1398	18.0252	17.9458		18.0369
AML3	20.0048	20.4122	20.0678	21.5776	21.0664	21.6614	19.9449	19.8528	20.0425	26.1304	26.3185	26.8471	22.9249	23.0149	22.6528	28.7011	28.8993	28.7356		17.7893	17.9302	17.8173		17.8456
AML4	22.0831	22.06	22.172	22.8481	22.9921	22.8603	21.1122	21.0028	21.0923	27.1635	27.7745	27.0603	24.3675	24.3551	24.5929	30.2834	30.7611	30.3676		18.5465	19.0406	18.7237		18.7702
AML5	23.9238	23.7777	23.7732	23.968	23.9188	23.8068	21.4875	21.4578	21.6918	28.9446	28.7257	28.8331	25.7636	25.64	25.5907	31.7093	31.5264	31.4301		20.2411	20.1664	20.1278		20.1784
	∆CT=CTTarget gene-CT reference gene mean value
Control1	1.32116	1.26231	1.14418	3.6386	3.15095	3.19917	-0.0177134	0.0888268	0.106047	10.511	10.2578	10.5891	2.61843	2.77611	2.62498	13.3761	13.2983	13.6096
Control2	1.69069	1.73292	1.83142	2.63336	2.71379	2.782	2.30079	2.45237	2.46926	9.8258	9.86478	10.0075	3.93193	3.7755	4.04415	12.9179	13.294	13.1013
Control3	1.85233	1.96211	1.74984	3.02195	2.95992	2.93946	0.786267	0.70867	0.69859	8.36229	8.07877	8.00662	3.74456	3.73676	3.71839	10.2856	10.6564	10.1845
Control4	2.2314	2.27857	2.13872	2.90608	2.86481	2.90543	1.84072	0.728835	0.748703	7.89399	8.42747	8.0972	3.89759	3.7377	3.70292	10.8069	10.9271	11.2013
Control5	2.50086	2.38397	2.40305	3.33572	3.46043	3.29812	0.502312	0.689515	0.628238	8.22416	7.23136	8.36686	4.78877	4.71488	4.91582	10.2147	10.5328	10.3423
AML1	2.48302	2.31976	2.303	3.6969	3.70658	3.56891	8.57532	3.99208	3.0279	10.6909	10.4534	10.6123	4.54305	4.49466	4.56334	11.4903	11.423	11.6467
AML2	2.86349	2.78952	2.81078	3.68804	3.95234	3.84044	2.16146	2.02268	2.18898	9.38411	10.3988	10.2891	5.12947	5.15614	5.0465	12.7684	12.7527	12.8647
AML3	2.15915	2.5666	2.22214	3.73198	3.22077	3.81578	2.09932	2.0072	2.19688	8.28474	8.47287	9.00149	5.0793	5.16929	4.80719	10.8554	11.0537	10.89
AML4	3.31282	3.2898	3.4018	4.07791	4.22185	4.09009	2.342	2.23254	2.32206	8.39329	9.00427	8.29008	5.59723	5.58485	5.82263	11.5132	11.9908	11.5973
AML5	3.74541	3.59922	3.5948	3.78956	3.74034	3.62836	1.30907	1.27937	1.51341	8.76615	8.54726	8.65468	5.58516	5.46154	5.41229	11.5308	11.348	11.2516
	∆CTControl mean
Control1	1.8989	1.8989	1.8989	3.05399	3.05399	3.05399	0.982096	0.982096	0.982096	8.91631	8.91631	8.91631	3.7819	3.7819	3.7819	11.6499	11.6499	11.6499
Control2	1.8989	1.8989	1.8989	3.05399	3.05399	3.05399	0.982096	0.982096	0.982096	8.91631	8.91631	8.91631	3.7819	3.7819	3.7819	11.6499	11.6499	11.6499
Control3	1.8989	1.8989	1.8989	3.05399	3.05399	3.05399	0.982096	0.982096	0.982096	8.91631	8.91631	8.91631	3.7819	3.7819	3.7819	11.6499	11.6499	11.6499
Control4	1.8989	1.8989	1.8989	3.05399	3.05399	3.05399	0.982096	0.982096	0.982096	8.91631	8.91631	8.91631	3.7819	3.7819	3.7819	11.6499	11.6499	11.6499
Control5	1.8989	1.8989	1.8989	3.05399	3.05399	3.05399	0.982096	0.982096	0.982096	8.91631	8.91631	8.91631	3.7819	3.7819	3.7819	11.6499	11.6499	11.6499
Control1	1.8989	1.8989	1.8989	3.05399	3.05399	3.05399	0.982096	0.982096	0.982096	8.91631	8.91631	8.91631	3.7819	3.7819	3.7819	11.6499	11.6499	11.6499
Control2	1.8989	1.8989	1.8989	3.05399	3.05399	3.05399	0.982096	0.982096	0.982096	8.91631	8.91631	8.91631	3.7819	3.7819	3.7819	11.6499	11.6499	11.6499
Control3	1.8989	1.8989	1.8989	3.05399	3.05399	3.05399	0.982096	0.982096	0.982096	8.91631	8.91631	8.91631	3.7819	3.7819	3.7819	11.6499	11.6499	11.6499
Control4	1.8989	1.8989	1.8989	3.05399	3.05399	3.05399	0.982096	0.982096	0.982096	8.91631	8.91631	8.91631	3.7819	3.7819	3.7819	11.6499	11.6499	11.6499
Control5	1.8989	1.8989	1.8989	3.05399	3.05399	3.05399	0.982096	0.982096	0.982096	8.91631	8.91631	8.91631	3.7819	3.7819	3.7819	11.6499	11.6499	11.6499
	∆∆CT=∆CTExperimental group-∆CTControl mean
Control1	-0.577744	-0.63659	-0.754719	0.584609	0.0969594	0.14518	-0.999809	-0.893269	-0.876049	1.59465	1.34147	1.6728	-1.16347	-1.00579	-1.15692	1.72623	1.64839	1.95966
Control2	-0.208213	-0.165984	-0.0674849	-0.42063	-0.340192	-0.271986	1.31869	1.47028	1.48717	0.909491	0.948475	1.09118	0.150026	-0.00639598	0.262251	1.268	1.64404	1.45135
Control3	-0.046571	0.0632111	-0.149062	-0.0320392	-0.0940656	-0.114523	-0.195829	-0.273426	-0.283506	-0.55402	-0.837541	-0.909691	-0.0373374	-0.0451391	-0.063506	-1.36428	-0.993524	-1.46542
Control4	0.332496	0.379666	0.23982	-0.147902	-0.189179	-0.148551	0.858628	-0.253261	-0.233393	-1.02232	-0.488838	-0.819112	0.115687	-0.0442036	-0.0789843	-0.843049	-0.722842	-0.448574
Control5	0.601958	0.485068	0.504148	0.281738	0.406445	0.244136	-0.479784	-0.292581	-0.353858	-0.692147	-1.68495	-0.549448	1.00687	0.932983	1.13392	-1.43523	-1.11714	-1.30761
AML1	0.584112	0.420858	0.404097	0.642911	0.652593	0.514921	7.59322	3.00999	2.04581	1.77461	1.5371	1.69602	0.76115	0.71276	0.781437	-0.159666	-0.226869	-0.00325343
AML2	0.964591	0.890614	0.91188	0.634055	0.898358	0.786451	1.17937	1.04059	1.20689	0.467798	1.4825	1.37284	1.34757	1.37424	1.2646	1.11845	1.10275	1.21473
AML3	0.260246	0.667694	0.323236	0.677989	0.166782	0.761795	1.11722	1.0251	1.21478	-0.631572	-0.443437	0.0851763	1.29741	1.38739	1.02529	-0.794472	-0.596246	-0.7599
AML4	1.41391	1.3909	1.5029	1.02392	1.16786	1.03611	1.35991	1.25044	1.33997	-0.523016	0.0879562	-0.626233	1.81533	1.80295	2.04073	-0.136706	0.340898	-0.0525995
AML5	1.8465	1.70032	1.6959	0.735579	0.686353	0.57437	0.326976	0.297276	0.531318	-0.150163	-0.369051	-0.261629	1.80326	1.67964	1.63039	-0.119086	-0.301898	-0.398287
	2^-∆∆CT
Control1	1.49251	1.55465	1.6873	0.66683	0.935001	0.904266	1.99974	1.85738	1.83534	0.331104	0.394618	0.313644	2.23995	2.00804	2.2298	0.302241	0.318997	0.257088
Control2	1.15526	1.12193	1.04789	1.33851	1.26592	1.20747	0.400898	0.360913	0.356712	0.532373	0.51818	0.469378	0.901234	1.00444	0.833786	0.415234	0.31996	0.365679
Control3	1.03281	0.957131	1.10885	1.02246	1.06737	1.08262	1.14538	1.20867	1.21715	1.46817	1.787	1.87864	1.02622	1.03178	1.045	2.57448	1.99104	2.76143
Control4	0.794161	0.768616	0.846851	1.10796	1.14011	1.10846	0.551477	1.1919	1.1756	2.03118	1.40331	1.76432	0.922943	1.03111	1.05627	1.79384	1.65043	1.36469
Control5	0.658859	0.714463	0.705077	0.822599	0.75448	0.844322	1.39453	1.22483	1.27797	1.61569	3.21529	1.46353	0.497624	0.523774	0.455677	2.70426	2.16916	2.47531
AML1	0.66706	0.74698	0.755709	0.640419	0.636136	0.699831	0.0051786	0.124138	0.242187	0.292272	0.344578	0.308637	0.590026	0.610152	0.581787	1.11703	1.17029	1.00226
AML2	0.512424	0.539385	0.531492	0.644363	0.536497	0.579769	0.441545	0.486129	0.433202	0.723068	0.357868	0.386131	0.392953	0.385755	0.416214	0.46059	0.465629	0.430853
AML3	0.834946	0.629512	0.799275	0.625036	0.890827	0.589762	0.460981	0.491375	0.430838	1.54925	1.35984	0.942669	0.406857	0.382256	0.491312	1.73444	1.51178	1.69337
AML4	0.375292	0.381327	0.352844	0.491778	0.44508	0.487642	0.389607	0.42032	0.39503	1.43696	0.940855	1.54353	0.284138	0.286588	0.243041	1.09939	0.78955	1.03713
AML5	0.278066	0.307718	0.308663	0.600577	0.621423	0.67158	0.797206	0.813787	0.691922	1.10969	1.2915	1.19883	0.286526	0.312161	0.323	1.08605	1.23277	1.31794
	2^-∆∆CT Avg
	CCL4			CCL20			CCR2			CXCR2			CXCR3			CXCR6
	Control	AML		Control	AML		Control	AML		Control	AML		Control	AML		Control	AML
1	1.51296	0.693372		0.820682	0.647216		1.65493	0.108005		0.27086	0.246395		1.92703	0.530105		0.204606	0.766307
2	1.06257	0.505965		1.2483	0.57656		0.325181	0.395638		0.396096	0.382319		0.814945	0.355469		0.256448	0.31613
3	0.990258	0.723406		1.03889	0.689538		1.03823	0.402126		1.33788	1.00377		0.923092	0.380905		1.70681	1.15068
4	0.770028	0.354544		1.09918	0.466487		0.848612	0.350309		1.35481	1.0219		0.895523	0.242082		1.12025	0.681628
5	0.66418	0.285832		0.792946	0.620098		1.13305	0.669511		1.64035	0.938171		0.439405	0.274187		1.71189	0.847181
Avg	1	0.512624		1	0.59998		1	0.385118		1	0.718513		1	0.35655		1	0.752385
SD	0.328938	0.195938		0.192372	0.0851842		0.481247	0.199551		0.621782	0.37336		0.553339	0.112475		0.742689	0.301306
	±	±		±	±		±	±		±	±		±	±		±	±
	1±0.3289	0.5126±0.1959		1±0.1924	0.5999±0.0852		1±0.4812	0.3851±0.1995		1±0.6218	0.7185±0.3733		1±0.5533	0.3565±0.1124		1±0.7427	0.7524±0.3013
		Control	AML	p值
	CCL4	1±0.3289	0.5126±0.1959	0.0216
	CCL20	1±0.1924	0.5999±0.0852	0.0028
	CCR2	1±0.4812	0.3851±0.1995	0.0298
	CXCR2	1±0.6218	0.7185±0.3733	0.4108
	CXCR3	1±0.5533	0.3565±0.1124	0.0343
	CXCR6	1±0.7427	0.7524±0.3013	0.5092
