# Supplementary material for: Prognostic role of chemokine-related genes in acute myeloid leukemia
Source: PeerJ journal article supplement (doi:10.7717/peerj.17862), 2024-08-09
Supplement: raw_data.7z [file raw_data.7z]

ONTOLOGY	ID	Description	GeneRatio	BgRatio	pvalue	p.adjust	qvalue	geneID	Count
BP	GO:0022613	ribonucleoprotein complex biogenesis	246/5019	489/18903	7.71313785352617e-30	4.93178034354463e-26	3.60000560447737e-26	RPL7/EIF3E/C1QBP/XPO1/NPM1/DDX1/RPL35/RPL26/RPLP0/EIF3M/ABCE1/CLNS1A/RPS17/RPS19/TRMT61B/TFB2M/BRIX1/RAN/SIRT7/EIF3D/DDX10/EIF3J/RPL11/RPS24/NOB1/TSR1/RPL24/POLR2D/SRFBP1/WDR43/RPL10A/RPL7L1/RPS6/WDR12/FASTKD2/METTL5/WDR36/EIF3B/DCAF13/RPL6/NOL11/HEATR1/PRKDC/RPS21/POP5/SHQ1/EXOSC2/DROSHA/NOP14/RPS8/RSL1D1/TAF9/EIF2D/ZNHIT6/DIMT1/NHP2/RPS25/DKC1/DIS3/PA2G4/RPSA/MRPL1/PWP1/RPP40/MAK16/NOL8/WDR3/BM…	246
BP	GO:0007159	leukocyte cell-cell adhesion	214/5019	414/18903	3.90402333032883e-28	1.136843131645e-24	8.2985075576016e-25	SIRPG/CCR7/CD177/HLA-DOB/TNFSF14/CD6/CD5/MYB/ADORA2A/IL4R/SOCS6/IL23A/EXT1/LCK/CD28/TNFRSF13C/GATA3/NFKBID/TNIP1/FCHO1/CD40LG/IFNG/FLOT2/CD3E/XCL1/IL7R/IL6/IL1A/HFE/CD27/CD274/RASGRP1/VAV1/SMARCC1/GLMN/SLAMF1/RARA/HES1/XBP1/CD160/LILRB1/CRTAM/ZC3H12A/STK10/PTPN11/ICOS/ZDHHC21/RPS3/TNFRSF14/PDE5A/BMI1/SART1/TNF/ETS1/LILRB2/LEF1/SKAP1/SIRPB1/CARD11/TBX21/SMAD7/BTN2A2/SASH3/IRF1/ACTL6A/ALOX5/SMARCA4…	214
BP	GO:0042254	ribosome biogenesis	173/5019	310/18903	5.33395276029873e-28	1.136843131645e-24	8.2985075576016e-25	RPL7/C1QBP/XPO1/NPM1/RPL35/RPL26/RPLP0/ABCE1/RPS17/RPS19/TRMT61B/TFB2M/BRIX1/RAN/SIRT7/DDX10/RPL11/RPS24/NOB1/TSR1/RPL24/SRFBP1/WDR43/RPL10A/RPL7L1/RPS6/WDR12/FASTKD2/METTL5/WDR36/DCAF13/RPL6/NOL11/HEATR1/PRKDC/RPS21/POP5/SHQ1/EXOSC2/DROSHA/NOP14/RPS8/RSL1D1/ZNHIT6/DIMT1/NHP2/RPS25/DKC1/DIS3/PA2G4/RPSA/MRPL1/PWP1/RPP40/MAK16/NOL8/WDR3/BMS1/NAT10/LTV1/SART1/TMA16/RPS5/UTP6/EXOSC8/MRTO4/EIF2A/MRPL2…	173
BP	GO:0050863	regulation of T cell activation	195/5019	376/18903	5.73506295613156e-26	9.16749813537631e-23	6.6919129335493e-23	SIRPG/CCR7/HLA-DOB/TNFSF14/CD6/CD5/TCF7/MYB/ADORA2A/IL4R/SOCS6/IL23A/LCK/CD28/TNFRSF13C/GATA3/NFKBID/FCHO1/CD40LG/IFNG/FLOT2/CD3E/XCL1/IL7R/IL6/IL1A/HFE/CD27/CD274/RASGRP1/VAV1/SMARCC1/CAMK4/GLMN/SLAMF1/RARA/HES1/DROSHA/CD2/XBP1/CD160/JUNB/LILRB1/CRTAM/ZC3H12A/SLC46A2/KAT2A/TNFRSF9/PTPN11/ICOS/RPS3/TNFRSF14/PDE5A/CLPTM1/BMI1/SART1/LILRB2/LEF1/SIRPB1/CARD11/IRF4/TBX21/SMAD7/BTN2A2/SASH3/IRF1/ACTL6…	195
BP	GO:0016072	rRNA metabolic process	152/5019	268/18903	9.49693012846854e-26	1.21446742482856e-22	8.86513435571147e-23	DEDD2/RPL7/DEDD/RPL35/RPL26/SPIN1/RPS17/RPS19/TRMT61B/TFB2M/BRIX1/SIRT7/GTF3C3/NCL/DDX10/RPL11/RPS24/NOB1/TSR1/SRFBP1/WDR43/RPL10A/RPL7L1/RPS6/WDR12/METTL5/WDR36/DCAF13/NOL11/HEATR1/PRKDC/RPS21/POP5/SHQ1/EXOSC2/DROSHA/NOP14/RPS8/RSL1D1/ZNHIT6/DIMT1/NHP2/RPS25/DKC1/DIS3/PA2G4/MRPL1/PWP1/RPP40/MAK16/NOL8/WDR3/BMS1/NAT10/SART1/UTP6/EXOSC8/MRTO4/GTPBP4/RPS7/RBFA/RPF2/GTF3C4/RPL14/GTF3A/WDR18/ISG20/YT…	152
BP	GO:0050900	leukocyte migration	200/5019	398/18903	2.2134870820526e-24	2.35883940044072e-21	1.72185995119671e-21	CCR7/CD177/TNFSF14/C1QBP/IL23A/EXT1/LCK/GATA3/FPR2/XCL2/CXCR1/MYD88/FFAR2/CXCR3/GPR18/CXCL16/RPS19/PADI2/CYP19A1/GPSM3/XCL1/C5AR2/KIT/IL6/IL1A/WDR1/CNN2/CXCR5/CALR/VAV1/SLAMF1/PPIA/CRTAM/STK10/CXCR2/TNFRSF14/TNF/MMP9/SLAMF8/MAPK3/HMOX1/PIK3CD/CMKLR1/S1PR1/TBX21/AIMP1/NINJ1/NLRP12/CXCL5/ALOX5/ITGB2/C5/PF4/RAC2/ICAM1/SIRPA/ZAP70/GPR15/IL16/EDN1/SPI1/DPP4/PF4V1/ADAM8/CCR1/NOD2/CREB3/C5AR1/ITGB3/ABL1…	200
BP	GO:0030217	T cell differentiation	159/5019	296/18903	1.81585959314933e-23	1.6465028667513e-20	1.20188230926614e-20	CCR7/TCF7/MYB/IL4R/IL23A/ZFP36L1/LCK/CDK6/CD28/GATA3/ITK/NFKBID/IFNG/GPR18/RPL22/EOMES/BCL11B/CD3E/KIT/IL7R/IL6/SEMA4A/IL1A/CD27/RASGRP1/RPS6/IKZF3/VAV1/SMARCC1/CAMK4/PRKDC/RARA/DROSHA/THEMIS/CD2/XBP1/JUNB/CRTAM/ZC3H12A/SLC46A2/KAT2A/TNFRSF9/LY9/CD3G/CLPTM1/BMI1/SART1/BCL3/LILRB2/JMJD6/LEF1/PIK3CD/CD8A/CARD11/IRF4/TBX21/RORA/SMAD7/BTN2A2/SASH3/KLRC1/IRF1/ACTL6A/SMARCA4/TGFBR2/CLEC4E/ZAP70/IL15/SP…	159
BP	GO:1903037	regulation of leukocyte cell-cell adhesion	190/5019	377/18903	2.06005988958562e-23	1.6465028667513e-20	1.20188230926614e-20	SIRPG/CCR7/HLA-DOB/TNFSF14/CD6/CD5/MYB/ADORA2A/IL4R/SOCS6/IL23A/LCK/CD28/TNFRSF13C/GATA3/NFKBID/FCHO1/CD40LG/IFNG/FLOT2/CD3E/XCL1/IL7R/IL6/IL1A/HFE/CD27/CD274/RASGRP1/VAV1/SMARCC1/GLMN/SLAMF1/RARA/HES1/XBP1/CD160/LILRB1/CRTAM/ZC3H12A/PTPN11/ICOS/ZDHHC21/RPS3/TNFRSF14/PDE5A/BMI1/SART1/TNF/ETS1/LILRB2/LEF1/SKAP1/SIRPB1/CARD11/TBX21/SMAD7/BTN2A2/SASH3/IRF1/ACTL6A/ALOX5/SMARCA4/ITGB2/CEACAM1/CD55/TGF…	190
BP	GO:0050867	positive regulation of cell activation	222/5019	467/18903	7.11231172114355e-23	4.95274784470253e-20	3.6153110553333e-20	SIRPG/CCR7/CD177/HLA-DOB/TNFSF14/CD6/CD5/MYB/IL4R/IL23A/FCRL3/LCK/CD28/TNFRSF13C/GATA3/NFKBID/MYD88/FCHO1/CD40/CD40LG/IFNG/FLOT2/CD3E/XCL1/IL7R/IL6/IL1A/CD27/CD274/RASGRP1/VAV1/SMARCC1/ZNF335/PRKDC/SLAMF1/RARA/HES1/LILRA5/CD2/XBP1/CD160/VAMP8/LILRB1/MSH2/PTPN11/ICOS/FGR/RPS3/TNFRSF14/BMI1/SART1/TNF/LILRB2/LEF1/SIRPB1/CARD11/TBX21/BTN2A2/SASH3/ACTL6A/SMARCA4/ITGB2/FCGR3A/CD55/SLC39A10/TGFBR2/SIRPA…	222
BP	GO:0006364	rRNA processing	131/5019	229/18903	7.74593031701992e-23	4.95274784470253e-20	3.6153110553333e-20	RPL7/RPL35/RPL26/RPS17/RPS19/TRMT61B/TFB2M/BRIX1/SIRT7/DDX10/RPL11/RPS24/NOB1/TSR1/SRFBP1/WDR43/RPL10A/RPL7L1/RPS6/WDR12/METTL5/WDR36/DCAF13/NOL11/HEATR1/PRKDC/RPS21/POP5/SHQ1/EXOSC2/DROSHA/NOP14/RPS8/RSL1D1/ZNHIT6/DIMT1/NHP2/RPS25/DKC1/DIS3/PA2G4/MRPL1/PWP1/RPP40/MAK16/NOL8/WDR3/BMS1/NAT10/SART1/UTP6/EXOSC8/MRTO4/GTPBP4/RPS7/RBFA/RPF2/RPL14/WDR18/ISG20/YTHDF2/RPP30/ERI2/MRPS11/UTP3/WDR75/METTL15…	131
BP	GO:0002263	cell activation involved in immune response	158/5019	297/18903	9.42547649015352e-23	5.47877242527651e-20	3.99928830213787e-20	BLK/CD177/MYB/IL4R/IL23A/CD28/GATA3/NFKBID/MYD88/CD40/CD40LG/IFNG/SLC11A1/EOMES/EIF2AK4/SH2D1B/KIT/IL6/SEMA4A/SLC15A4/RASGRP1/RPS6/SLAMF1/RARA/POU2AF1/STXBP2/XBP1/JUNB/VAMP8/LILRB1/ZC3H12A/MSH2/THOC1/FGR/LY9/MSH6/BCL3/VAMP2/HMOX1/LEF1/PIK3CD/IRF4/TBX21/RORA/PHF14/SMAD7/UNG/ITGB2/FCGR3A/CEACAM1/RAC2/CLEC4E/ICAM1/PTGDR/SPI1/ERCC1/LILRA2/CLEC4D/SBNO2/ABL1/LAT/APBB1IP/DYSF/KLRC2/CR1/TP53BP1/LFNG/RABG…	158
BP	GO:0030098	lymphocyte differentiation	204/5019	419/18903	1.11118074241984e-22	5.92074138919369e-20	4.32190825604347e-20	FLT3/CCR7/CR2/TCF7/MYB/MS4A1/IL4R/IL23A/ZFP36L1/FCRL3/LCK/CDK6/CD28/GATA3/CD79A/ITK/NFKBID/CD40LG/IFNG/GPR18/RPL22/EOMES/PAX5/BCL11B/CD3E/KIT/IL7R/IL6/SEMA4A/IL1A/CD27/RASGRP1/RPS6/IKZF3/VAV1/SMARCC1/CAMK4/PRKDC/SLAMF1/RARA/POU2AF1/DROSHA/THEMIS/CD2/XBP1/JUNB/CRTAM/ZC3H12A/MSH2/SLC46A2/KAT2A/TNFRSF9/TOP2B/LY9/CD3G/CLPTM1/BMI1/SART1/BCL3/SLAMF8/LILRB2/JMJD6/LEF1/PIK3CD/CD8A/CARD11/IRF4/TBX21/RORA/…	204
BP	GO:1903039	positive regulation of leukocyte cell-cell adhesion	149/5019	275/18903	1.45381043456897e-22	7.15051070664156e-20	5.21959147115695e-20	SIRPG/CCR7/HLA-DOB/TNFSF14/CD6/CD5/MYB/IL4R/IL23A/LCK/CD28/TNFRSF13C/GATA3/NFKBID/FCHO1/CD40LG/IFNG/FLOT2/CD3E/XCL1/IL7R/IL6/IL1A/CD27/CD274/RASGRP1/VAV1/SMARCC1/SLAMF1/RARA/HES1/XBP1/CD160/LILRB1/PTPN11/ICOS/RPS3/TNFRSF14/BMI1/SART1/TNF/ETS1/LILRB2/LEF1/SKAP1/SIRPB1/CARD11/BTN2A2/SASH3/ACTL6A/ALOX5/SMARCA4/ITGB2/CD55/TGFBR2/SIRPA/ZAP70/IL15/DPP4/ADAM8/NOD2/ABL1/LILRB4/PHF10/SMARCE1/STAT5B/CR1/BC…	149
BP	GO:0002366	leukocyte activation involved in immune response	156/5019	293/18903	1.57748036403783e-22	7.2045781768985e-20	5.25905859710057e-20	BLK/CD177/MYB/IL4R/IL23A/CD28/GATA3/NFKBID/MYD88/CD40/CD40LG/IFNG/SLC11A1/EOMES/EIF2AK4/SH2D1B/KIT/IL6/SEMA4A/SLC15A4/RASGRP1/RPS6/SLAMF1/RARA/POU2AF1/STXBP2/XBP1/JUNB/VAMP8/LILRB1/ZC3H12A/MSH2/THOC1/FGR/LY9/MSH6/BCL3/VAMP2/HMOX1/LEF1/PIK3CD/IRF4/TBX21/RORA/PHF14/SMAD7/UNG/ITGB2/FCGR3A/CEACAM1/RAC2/CLEC4E/ICAM1/PTGDR/SPI1/ERCC1/LILRA2/CLEC4D/SBNO2/ABL1/LAT/APBB1IP/DYSF/KLRC2/CR1/TP53BP1/LFNG/RABG…	156
BP	GO:1903131	mononuclear cell differentiation	223/5019	473/18903	2.14823424409903e-22	9.15720650451279e-20	6.68440044795445e-20	FLT3/CCR7/BLK/CR2/TCF7/MYB/MS4A1/IL4R/IL23A/ZFP36L1/FCRL3/LCK/CDK6/CD28/GATA3/CD79A/ITK/NFKBID/CD40LG/IFNG/GPR18/RPL22/EOMES/PAX5/BCL11B/CD3E/KIT/IL7R/IL6/SEMA4A/IL1A/CD27/RASGRP1/RPS6/IKZF3/VAV1/SMARCC1/CAMK4/PRKDC/SLAMF1/RARA/POU2AF1/DROSHA/THEMIS/CD2/XBP1/JUNB/LILRB1/CRTAM/ZC3H12A/MSH2/SLC46A2/KAT2A/TNFRSF9/TOP2B/LY9/CD3G/CLPTM1/BMI1/SART1/BCL3/SLAMF8/LILRB2/JMJD6/LEF1/PIK3CD/CD8A/CARD11/IRF4/…	223
BP	GO:0001819	positive regulation of cytokine production	227/5019	486/18903	4.0289871261318e-22	1.53007889603009e-19	1.11689739146855e-19	LTB/CCR7/CD6/MAPK13/IL4R/IL23A/DDX1/CD28/GATA3/ITK/MYD88/FFAR2/CD40/CD40LG/IFNG/SLC11A1/G3BP1/KIR2DL4/GPSM3/CD3E/XCL1/HPSE/KIT/IL6/IL1A/CYP1B1/CD274/RASGRP1/APPL1/GLMN/STOML2/SLAMF1/RARA/POU2AF1/LILRA5/CD2/XBP1/CD160/HDAC2/LILRB1/CRTAM/KAT2A/PTPN11/POLR3D/CLEC6A/PIBF1/FGR/RPS3/TNFRSF14/LY9/TNF/BCL3/LILRB2/HMOX1/PIK3CD/MEFV/CARD11/NLRC4/IRF4/TBX21/RORA/PRKD2/SASH3/NLRP12/NLRP1/BTN3A1/HEG1/IRF1/LY9…	227
BP	GO:0002696	positive regulation of leukocyte activation	214/5019	450/18903	4.06808589810939e-22	1.53007889603009e-19	1.11689739146855e-19	SIRPG/CCR7/CD177/HLA-DOB/TNFSF14/CD6/CD5/MYB/IL4R/IL23A/FCRL3/LCK/CD28/TNFRSF13C/GATA3/NFKBID/MYD88/FCHO1/CD40/CD40LG/IFNG/FLOT2/CD3E/XCL1/IL7R/IL6/IL1A/CD27/CD274/RASGRP1/VAV1/SMARCC1/ZNF335/PRKDC/SLAMF1/RARA/HES1/CD2/XBP1/CD160/VAMP8/LILRB1/MSH2/PTPN11/ICOS/FGR/RPS3/TNFRSF14/BMI1/SART1/TNF/LILRB2/LEF1/SIRPB1/CARD11/TBX21/BTN2A2/SASH3/ACTL6A/SMARCA4/ITGB2/FCGR3A/CD55/SLC39A10/TGFBR2/SIRPA/ZAP70/…	214
BP	GO:0022407	regulation of cell-cell adhesion	228/5019	490/18903	5.99168390601204e-22	2.12837927194672e-19	1.55363312510277e-19	SIRPG/ADAM19/CCR7/BLK/HLA-DOB/TNFSF14/CD6/CD5/MYB/ADORA2A/IL4R/SOCS6/IL23A/LCK/ZNF703/CD28/TNFRSF13C/GATA3/NFKBID/FCHO1/CD40LG/IFNG/FLOT2/IL1RN/CD3E/XCL1/IL7R/IL6/IL1A/HFE/MINK1/ABAT/CD27/CD274/RASGRP1/VAV1/SMARCC1/GLMN/SLAMF1/RARA/HES1/XBP1/CD160/LILRB1/CRTAM/MYO10/ZC3H12A/MAPK7/PTPN11/ICOS/ZDHHC21/RPS3/TNFRSF14/PDE5A/BMI1/SART1/TNF/ETS1/LILRB2/LEF1/SKAP1/SIRPB1/CARD11/TBX21/GTPBP4/SMAD7/BTN2A2/…	228
BP	GO:0002768	immune response-regulating cell surface receptor signaling pathway	173/5019	341/18903	7.93644079477366e-22	2.67082118114646e-19	1.94959437584634e-19	CCR7/BLK/CD22/CR2/LILRA4/MS4A1/NCR3/FCRL3/LCK/CD28/GATA3/FPR2/UBASH3A/CD79A/ITK/NFKBID/KIR2DL1/FFAR2/FCHO1/CD40/KIR2DS2/TEC/CD3E/C5AR2/KIT/CD8B/VAV1/APPL1/RBCK1/STOML2/BTLA/THEMIS/CD160/BTN2A1/LILRB1/KLRD1/ZC3H12A/FPR1/MICB/SH2B2/CLEC6A/CD247/PLD2/FGR/RPS3/PLEKHA1/CD3G/LILRB2/PIK3CD/CMKLR1/CD8A/SKAP1/CARD11/PRKD2/BTN2A2/KLRC1/BTN3A1/FCGR3A/CEACAM1/SLC39A10/CLEC4E/ZAP70/LCP2/LILRA2/CLEC4D/C5AR1/KL…	173
BP	GO:0002697	regulation of immune effector process	185/5019	379/18903	7.7365039984742e-21	2.4733603283122e-18	1.80545572259129e-18	BLK/CD177/CD22/CR2/C1QBP/MYB/IL4R/IL23A/NCR3/FCRL3/DDX1/CD28/GATA3/NFKBID/MYD88/FFAR2/CD40/CD40LG/IFNG/RPS19/KIR2DL4/SH2D1B/XCL1/KIT/IL7R/IL6/SLC15A4/HFE/RASGRP1/VAV1/APPL1/NCR1/SLAMF1/RARA/STXBP2/XBP1/CD160/JUNB/LITAF/VAMP8/LILRB1/CRTAM/KLRD1/ZC3H12A/MSH2/THOC1/FGR/WAS/TNFRSF14/TNF/SLAMF8/HMOX1/IRF4/TBX21/SMAD7/SASH3/KLRC1/CR1L/SERPINB9/KLRB1/ITGB2/CEACAM1/CD55/RAC2/ICAM1/TNFRSF1B/SPI1/NOD2/KLRC…	185
BP	GO:0002181	cytoplasmic translation	99/5019	161/18903	1.02405724679329e-20	3.11801049333158e-18	2.2760249785872e-18	RPL7/EIF3E/RPL35/RPL26/RPLP0/EIF3M/PAIP1/DRG1/RPL22/RPS17/RPS19/RPS23/SYNCRIP/EIF3D/EIF3J/RPL11/RPS24/RPL24/RPL10A/RPL19/RPS6/EIF3B/RPL36A/RPL6/RPS21/RPL36/RPS8/RPS15A/RPS20/RPL31/EIF2D/RPS25/RPL15/RPL12/RPSA/RPS3/RPL30/RPL29/NCBP2/RPL37A/RPS10/RPL4/RPS5/EIF3L/EIF3CL/RPS12/NCBP1/EIF3C/RPS18/RPS7/RPLP1/RPS2/DENR/RPS11/RPL14/RPS13/YTHDF2/EIF4B/RPL38/YBX1/EIF3H/RPL8/RPL27/ZNF385A/RPL34/RPL18A/EIF3I/…	99
BP	GO:0034470	ncRNA processing	206/5019	439/18903	1.77786790745869e-20	5.16713063649586e-18	3.77180205821619e-18	RPL7/DDX1/RPL35/RPL26/DTWD1/TARBP1/RPS17/RPS19/TRMT61B/TFB2M/BRIX1/TYW3/SIRT7/DDX10/RPL11/RPS24/NOB1/IL6/TSR1/SRFBP1/WDR43/RPL10A/RPL7L1/RPS6/TSN/WDR12/METTL5/WDR36/USB1/DCAF13/NOL11/HEATR1/PRKDC/RPS21/POP5/SHQ1/EXOSC2/THADA/DROSHA/NOP14/RPS8/RSL1D1/ZNHIT6/ZC3H12A/DIMT1/NHP2/RPS25/DKC1/DIS3/PA2G4/MRPL1/PWP1/RPP40/MAK16/NOL8/METTL8/WDR3/BMS1/NAT10/NCBP2/PUS7/SART1/TNF/UTP6/PARN/EXOSC8/MRTO4/THUMPD…	206
BP	GO:0022409	positive regulation of cell-cell adhesion	162/5019	322/18903	4.7194637319623e-20	1.31201091748552e-17	9.57716347254958e-18	SIRPG/ADAM19/CCR7/HLA-DOB/TNFSF14/CD6/CD5/MYB/IL4R/IL23A/LCK/CD28/TNFRSF13C/GATA3/NFKBID/FCHO1/CD40LG/IFNG/FLOT2/CD3E/XCL1/IL7R/IL6/IL1A/CD27/CD274/RASGRP1/VAV1/SMARCC1/SLAMF1/RARA/HES1/XBP1/CD160/LILRB1/MYO10/PTPN11/ICOS/RPS3/TNFRSF14/BMI1/SART1/TNF/ETS1/LILRB2/LEF1/SKAP1/SIRPB1/CARD11/SMAD7/BTN2A2/SASH3/ACTL6A/ALOX5/SMARCA4/ITGB2/CD55/TGFBR2/SIRPA/ZAP70/IL15/DPP4/FLOT1/ADAM8/PIEZO1/NOD2/ABL1/LI…	162
BP	GO:0070661	leukocyte proliferation	171/5019	348/18903	9.86173091398815e-20	2.62732947766834e-17	1.91784714353612e-17	FLT3/BLK/CD22/CR2/TNFSF14/CD6/MS4A1/IL23A/FCRL3/CD28/TNFRSF13C/CD79A/MYD88/CD40/CD40LG/SLC11A1/CD3E/XCL1/KIT/IL7R/IL6/IL1A/CNN2/CD274/RASGRP1/RPS6/IKZF3/GLMN/ZNF335/SLAMF1/HES1/IMPDH2/JUNB/LILRB1/RASSF5/CRTAM/TNFRSF9/SH2D2A/RPS3/TNFRSF14/PDE5A/BMI1/LILRB2/MAPK3/LEF1/CARD11/BTN2A2/SASH3/BTN3A1/IRF1/FCGR3A/CD55/SLC39A10/TGFBR2/TWSG1/RAC2/TNFRSF1B/ZAP70/IL15/CTPS1/GSTP1/HPRT1/ST6GAL1/ABL1/LILRB4/CCN…	171
BP	GO:0050870	positive regulation of T cell activation	134/5019	251/18903	1.12227593047385e-19	2.87033291977992e-17	2.09523009504045e-17	SIRPG/CCR7/HLA-DOB/TNFSF14/CD6/CD5/MYB/IL4R/IL23A/LCK/CD28/TNFRSF13C/GATA3/NFKBID/FCHO1/CD40LG/IFNG/FLOT2/CD3E/XCL1/IL7R/IL6/IL1A/CD27/CD274/RASGRP1/VAV1/SMARCC1/SLAMF1/RARA/HES1/XBP1/CD160/LILRB1/PTPN11/ICOS/RPS3/TNFRSF14/BMI1/SART1/LILRB2/LEF1/SIRPB1/CARD11/BTN2A2/SASH3/ACTL6A/SMARCA4/CD55/TGFBR2/SIRPA/ZAP70/IL15/DPP4/ADAM8/NOD2/ABL1/LILRB4/PHF10/SMARCE1/STAT5B/CR1/BCL10/RUNX3/BCL6/SOX4/IL18/PB…	134
BP	GO:0002703	regulation of leukocyte mediated immunity	130/5019	241/18903	1.22427351776548e-19	3.01077110484325e-17	2.19774444444215e-17	BLK/CD177/CR2/IL4R/IL23A/NCR3/DDX1/CD28/GATA3/CD40/KIR2DL4/SH2D1B/XCL1/KIT/IL7R/IL6/SLC15A4/HFE/RASGRP1/VAV1/NCR1/SLAMF1/STXBP2/CD160/VAMP8/LILRB1/CRTAM/KLRD1/MSH2/THOC1/FGR/WAS/TNF/HMOX1/TBX21/SMAD7/SASH3/KLRC1/CR1L/SERPINB9/KLRB1/ITGB2/CEACAM1/CD55/RAC2/ICAM1/TNFRSF1B/SPI1/NOD2/KLRC4/LILRB4/CD226/STAT5B/KLRC2/CR1/TP53BP1/RABGEF1/BCL6/RIF1/IL18/SLAMF6/KLRC3/ARRB2/DENND1B/ITGAM/CLEC7A/MLH1/IL18R1…	130
BP	GO:0051251	positive regulation of lymphocyte activation	189/5019	400/18903	2.70919498969043e-19	6.41577509780763e-17	4.68326338568708e-17	SIRPG/CCR7/HLA-DOB/TNFSF14/CD6/CD5/MYB/IL4R/IL23A/FCRL3/LCK/CD28/TNFRSF13C/GATA3/NFKBID/MYD88/FCHO1/CD40/CD40LG/IFNG/FLOT2/CD3E/XCL1/IL7R/IL6/IL1A/CD27/CD274/RASGRP1/VAV1/SMARCC1/ZNF335/PRKDC/SLAMF1/RARA/HES1/XBP1/CD160/LILRB1/MSH2/PTPN11/ICOS/RPS3/TNFRSF14/BMI1/SART1/LILRB2/LEF1/SIRPB1/CARD11/TBX21/BTN2A2/SASH3/ACTL6A/SMARCA4/FCGR3A/CD55/SLC39A10/TGFBR2/SIRPA/ZAP70/IL15/DPP4/ADAM8/NOD2/ABL1/LILR…	189
BP	GO:0002429	immune response-activating cell surface receptor signaling pathway	156/5019	312/18903	4.985754510597e-19	1.09927290830197e-16	8.0242597096142e-17	CCR7/BLK/CD22/CR2/MS4A1/NCR3/FCRL3/LCK/CD28/GATA3/FPR2/UBASH3A/CD79A/ITK/NFKBID/FFAR2/FCHO1/KIR2DS2/TEC/CD3E/C5AR2/CD8B/VAV1/APPL1/RBCK1/STOML2/THEMIS/CD160/BTN2A1/KLRD1/ZC3H12A/FPR1/MICB/SH2B2/CLEC6A/CD247/PLD2/FGR/RPS3/PLEKHA1/CD3G/PIK3CD/CMKLR1/CD8A/SKAP1/CARD11/PRKD2/BTN2A2/BTN3A1/CEACAM1/SLC39A10/ZAP70/LCP2/LILRA2/C5AR1/KLRC4/FCN1/ABL1/LILRB4/PHPT1/CD226/KHDRBS1/KLRC2/PRKCD/CR1/BCL10/RABGEF1…	156
BP	GO:0002757	immune response-activating signal transduction	156/5019	312/18903	4.985754510597e-19	1.09927290830197e-16	8.0242597096142e-17	CCR7/BLK/CD22/CR2/MS4A1/NCR3/FCRL3/LCK/CD28/GATA3/FPR2/UBASH3A/CD79A/ITK/NFKBID/FFAR2/FCHO1/KIR2DS2/TEC/CD3E/C5AR2/CD8B/VAV1/APPL1/RBCK1/STOML2/THEMIS/CD160/BTN2A1/KLRD1/ZC3H12A/FPR1/MICB/SH2B2/CLEC6A/CD247/PLD2/FGR/RPS3/PLEKHA1/CD3G/PIK3CD/CMKLR1/CD8A/SKAP1/CARD11/PRKD2/BTN2A2/BTN3A1/CEACAM1/SLC39A10/ZAP70/LCP2/LILRA2/C5AR1/KLRC4/FCN1/ABL1/LILRB4/PHPT1/CD226/KHDRBS1/KLRC2/PRKCD/CR1/BCL10/RABGEF1…	156
BP	GO:0002683	negative regulation of immune system process	204/5019	449/18903	2.59220682232985e-18	5.52485680732568e-16	4.03292808779317e-16	BLK/HLA-DOB/CD22/CR2/ADORA2A/IL4R/SOCS6/FCRL3/CDK6/UBASH3A/GPR18/RPS19/PADI2/KIR2DL4/CYP19A1/WDR41/XCL1/C5AR2/IL7R/GPR137B/HFE/CNN2/CD274/LILRB3/APPL1/GLMN/SLAMF1/RARA/NR1H2/CD160/LILRB1/RASSF5/CRTAM/KLRD1/ZC3H12A/THOC1/PIBF1/ZDHHC18/FGR/TNFRSF14/PDE5A/TRAFD1/TNF/SLAMF8/LILRB2/RHBDF2/HMOX1/NR1D1/TBX21/SMAD7/NLRC5/BTN2A2/ID2/KLRC1/CR1L/IRF1/SERPINB9/YTHDF2/CNOT7/PSMA1/CEACAM1/CD55/C5/TWSG1/ZNF675/…	204
BP	GO:0002443	leukocyte mediated immunity	208/5019	463/18903	5.72556230459513e-18	1.1809433992123e-15	8.6204221591086e-16	IL21R/BLK/CD177/HLA-DOB/CR2/C1QBP/IL4R/IL23A/NCR3/DDX1/CD28/SLAMF7/GATA3/MYD88/CD40/CD40LG/KIR3DL1/KIR2DL4/SH2D1B/XCL1/KIT/IL7R/IL6/SLC15A4/WDR1/HFE/CD27/GZMM/RASGRP1/VAV1/NCR1/SLAMF1/STXBP2/CD2/CD160/VAMP8/LILRB1/CRTAM/KLRD1/MSH2/THOC1/FGR/WAS/TNF/MSH6/BCL3/VAMP2/HMOX1/PIK3CD/CD8A/TBX21/SMAD7/UNG/SASH3/KLRC1/CR1L/SERPINB9/KLRB1/ITGB2/FCGR3A/CEACAM1/CD55/C5/RAC2/ICAM1/TNFRSF1B/PTGDR/RNF19B/SPI1/E…	208
BP	GO:0046631	alpha-beta T cell activation	99/5019	174/18903	2.22694774472693e-17	4.4497199624325e-15	3.24812049346026e-15	MYB/ADORA2A/IL4R/IL23A/CD28/GATA3/ITK/NFKBID/IFNG/GPR18/RPL22/EOMES/BCL11B/CD3E/XCL1/IL6/SEMA4A/HFE/CD274/STOML2/RARA/CD160/JUNB/LILRB1/CRTAM/ZC3H12A/CD247/TNFRSF14/LY9/CD3G/BCL3/CLEC4A/LEF1/CARD11/IRF4/TBX21/RORA/SMAD7/SASH3/IRF1/CD55/TGFBR2/TWSG1/ZAP70/IL15/ABL1/LILRB4/RUNX3/PRDM1/BCL6/IL18/SPN/SLAMF6/CD83/SOCS5/CBFB/TNFSF8/ITPKB/IL18R1/BATF/TYK2/ADA/TCIRG1/ZBTB7B/HMGB1/NFKBIZ/CD3D/HLA-E/NLRP3/…	99
BP	GO:0002253	activation of immune response	183/5019	397/18903	2.4329552065964e-17	4.7140350275689e-15	3.44106009124352e-15	CCR7/BLK/CD22/CR2/C1QBP/MS4A1/NCR3/FCRL3/LCK/CD28/GATA3/FPR2/UBASH3A/CD79A/ITK/NFKBID/FFAR2/FCHO1/ZBP1/MATR3/KIR2DS2/TEC/CD3E/C5AR2/CD8B/VAV1/APPL1/RBCK1/STOML2/PRKDC/THEMIS/CD160/BTN2A1/KLRD1/ZC3H12A/FPR1/MICB/SH2B2/CLEC6A/CD247/PLD2/FGR/RPS3/PLEKHA1/ZNFX1/CD3G/PIK3CD/CMKLR1/CD8A/SKAP1/CARD11/NLRC4/PRKD2/BTN2A2/BTN3A1/CR1L/CEACAM1/CD55/SLC39A10/C5/ZAP70/CASP6/NOD2/LCP2/LILRA2/C5AR1/KLRC4/FCN1/AB…	183
BP	GO:0032943	mononuclear cell proliferation	152/5019	312/18903	2.93501907232536e-17	5.51956233777892e-15	4.02906333334075e-15	FLT3/BLK/CD22/CR2/TNFSF14/CD6/MS4A1/IL23A/FCRL3/CD28/TNFRSF13C/CD79A/MYD88/CD40/CD40LG/SLC11A1/CD3E/XCL1/IL7R/IL6/IL1A/CD274/RASGRP1/RPS6/IKZF3/GLMN/ZNF335/SLAMF1/HES1/IMPDH2/LILRB1/RASSF5/CRTAM/TNFRSF9/SH2D2A/RPS3/TNFRSF14/PDE5A/BMI1/LILRB2/LEF1/CARD11/BTN2A2/SASH3/BTN3A1/IRF1/FCGR3A/CD55/SLC39A10/TGFBR2/TWSG1/RAC2/TNFRSF1B/ZAP70/IL15/CTPS1/HPRT1/ST6GAL1/ABL1/LILRB4/CCND3/STAT5B/PRKCD/CR1/CTLA4/…	152
BP	GO:0032103	positive regulation of response to external stimulus	206/5019	464/18903	4.06024721401502e-17	7.41749162468915e-15	5.41447703667447e-15	CCR7/TNFSF14/MAPK13/C1QBP/IL23A/NCR3/CD28/FPR2/XCL2/FFAR2/TNIP1/ZBP1/IFNG/RPS19/MATR3/KIR2DL4/SH2D1B/KIR2DS2/GPSM3/OASL/THBD/XCL1/IL6/SLC15A4/RASGRP1/UBE2K/CALR/VAV1/MIAT/TLR10/PRKDC/SLAMF1/LILRA5/CD160/VAMP8/CRTAM/KLRD1/POLR3D/CLEC6A/CXCR2/ZNFX1/TNF/ETS1/MAPK3/CMKLR1/NLRC4/S1PR1/NINJ1/PRKD2/NLRC5/NLRP12/NLRP1/LY96/RNF185/TMSB4X/RAC2/POLR3C/IL15/IL16/EDN1/SPI1/CASP6/ADAM8/TLR8/CCR1/NOD2/CREB3/LIL…	206
BP	GO:0046651	lymphocyte proliferation	149/5019	305/18903	4.43437884743108e-17	7.87594954179842e-15	5.74913327763433e-15	FLT3/BLK/CD22/CR2/TNFSF14/CD6/MS4A1/IL23A/FCRL3/CD28/TNFRSF13C/CD79A/MYD88/CD40/CD40LG/SLC11A1/CD3E/XCL1/IL7R/IL6/IL1A/CD274/RASGRP1/RPS6/IKZF3/GLMN/ZNF335/SLAMF1/HES1/IMPDH2/LILRB1/RASSF5/CRTAM/TNFRSF9/SH2D2A/RPS3/TNFRSF14/PDE5A/BMI1/LILRB2/LEF1/CARD11/BTN2A2/SASH3/BTN3A1/IRF1/FCGR3A/CD55/SLC39A10/TGFBR2/TWSG1/RAC2/TNFRSF1B/ZAP70/IL15/CTPS1/HPRT1/ABL1/LILRB4/CCND3/STAT5B/PRKCD/CR1/CTLA4/BCL6/MIF…	149
BP	GO:0002274	myeloid leukocyte activation	123/5019	237/18903	6.72831655652026e-17	1.16272583952407e-14	8.48744114128331e-15	BLK/CD177/IL4R/MYD88/IFNG/SLC11A1/KIT/IL6/GPR137B/RASGRP1/CAMK4/SLAMF1/STXBP2/CD2/VAMP8/ZC3H12A/CXCR2/FGR/TNF/JMJD6/VAMP2/HMOX1/NR1D1/PIK3CD/IRF4/RORA/ITGB2/FCGR3A/TLR1/TGFBR2/RAC2/PTGDR/IL15/SPI1/CRTC3/LCP2/LILRA2/CLEC4D/SBNO2/C5AR1/LILRB4/LAT/CD226/DYSF/LDLR/PRKCD/S100A12/RABGEF1/LRRK2/MIF/IL18/CLU/IFNGR2/MIR128-1/ITGAM/MMP8/GRN/CD93/ANXA3/LYN/SUCNR1/FCGR2B/BATF/CX3CR1/FER/FCER1G/ADAM9/HMGB1/TY…	123
BP	GO:1902105	regulation of leukocyte differentiation	152/5019	317/18903	1.76644118880465e-16	2.97226972663604e-14	2.16963995322987e-14	TCF7/MYB/IL4R/IL23A/ZFP36L1/FCRL3/CDK6/CD28/GATA3/NFKBID/IFNG/IL7R/GPR137B/CD27/RASGRP1/LILRB3/IKZF3/SMARCC1/CAMK4/PRKDC/RARA/DROSHA/CD2/XBP1/JUNB/LILRB1/CRTAM/ZC3H12A/SLC46A2/KAT2A/CLPTM1/SART1/TNF/SLAMF8/LILRB2/CD101/LEF1/CARD11/IRF4/TBX21/SMAD7/BTN2A2/ID2/SASH3/IRF1/ACTL6A/SMARCA4/CEACAM1/TGFBR2/PF4/ZAP70/IL15/ZNF675/ADAM8/CCR1/HCLS1/ABL1/LILRB4/PHF10/NEDD9/SMARCE1/STAT5B/CR1/CTLA4/RUNX3/PRDM1…	152
BP	GO:0070663	regulation of leukocyte proliferation	134/5019	269/18903	2.27669466975674e-16	3.73261172267297e-14	2.72465969384653e-14	BLK/CD22/CD6/IL23A/FCRL3/CD28/TNFRSF13C/MYD88/CD40/CD40LG/CD3E/XCL1/KIT/IL6/IL1A/CNN2/CD274/IKZF3/GLMN/ZNF335/SLAMF1/HES1/LILRB1/RASSF5/CRTAM/TNFRSF9/RPS3/TNFRSF14/PDE5A/BMI1/LILRB2/MAPK3/CARD11/BTN2A2/SASH3/IRF1/FCGR3A/CD55/SLC39A10/TGFBR2/TWSG1/RAC2/TNFRSF1B/ZAP70/IL15/GSTP1/ST6GAL1/LILRB4/STAT5B/CR1/CTLA4/BCL6/MIF/IL18/SPN/DHPS/CSF2RB/TNFSF8/GPAM/LYN/PDCD1LG2/CSF2RA/FCGR2B/CD38/MIR181B1/TYK2/A…	134
BP	GO:0002819	regulation of adaptive immune response	106/5019	198/18903	5.71801529396172e-16	9.1402474473978e-14	6.67202100353322e-14	CR2/IL4R/IL23A/CD28/GATA3/NFKBID/CD40/SLC11A1/EIF2AK4/XCL1/IL7R/IL6/SLC15A4/HFE/CD274/SLAMF1/CD160/JUNB/LILRB1/KLRD1/ZC3H12A/MSH2/THOC1/CLEC6A/WAS/TNFRSF14/TNF/SKAP1/TBX21/SMAD7/SASH3/KLRC1/CR1L/CD48/IRF1/CEACAM1/CD55/TNFRSF1B/NOD2/LILRB4/CD226/CR1/TP53BP1/BCL6/RIF1/IL18/AKIRIN2/SOCS5/DENND1B/CLEC7A/MLH1/IL18R1/FCER2/EXOSC6/FCGR2B/BATF/TYK2/ADA/ARG1/ZBTB7B/HMGB1/CD4/IL1B/NFKBIZ/MR1/TAP2/APLF/IL6S…	106
BP	GO:0031349	positive regulation of defense response	147/5019	307/18903	6.44418080812261e-16	1.0049778557838e-13	7.33594292765485e-14	CCR7/MAPK13/IL23A/NCR3/CD28/FPR2/FFAR2/TNIP1/ZBP1/IFNG/RPS19/MATR3/KIR2DL4/SH2D1B/KIR2DS2/GPSM3/IL6/SLC15A4/RASGRP1/UBE2K/VAV1/MIAT/TLR10/PRKDC/LILRA5/CD160/VAMP8/CRTAM/KLRD1/POLR3D/CLEC6A/ZNFX1/TNF/ETS1/MAPK3/NLRC4/NINJ1/NLRC5/NLRP12/NLRP1/RNF185/POLR3C/IL15/IL16/SPI1/CASP6/ADAM8/TLR8/NOD2/LILRA2/KLRC4/FCN1/CD226/STAT5B/KLRC2/LDLR/S100A12/LRRK2/HCK/DHX9/IL18/SLAMF6/PLA2G7/AKIRIN2/KLRC3/MIR128-1/…	147
BP	GO:0002285	lymphocyte activation involved in immune response	109/5019	207/18903	1.03680503728313e-15	1.57841224009247e-13	1.15217883090562e-13	MYB/IL4R/IL23A/CD28/GATA3/NFKBID/CD40/CD40LG/IFNG/SLC11A1/EOMES/EIF2AK4/IL6/SEMA4A/SLC15A4/RPS6/RARA/POU2AF1/XBP1/JUNB/LILRB1/ZC3H12A/MSH2/THOC1/LY9/MSH6/BCL3/LEF1/IRF4/TBX21/RORA/PHF14/SMAD7/UNG/FCGR3A/CEACAM1/CLEC4E/ICAM1/SPI1/ERCC1/CLEC4D/ABL1/APBB1IP/KLRC2/CR1/TP53BP1/LFNG/BCL6/RIF1/IL18/SPN/ITGAL/SLAMF6/PGLYRP1/SOCS5/PTK2B/PLCL2/MLH1/IL18R1/EXOSC6/FCGR2B/BATF/CD19/ADA/FCER1G/ZBTB7B/HMGB1/CCR…	109
BP	GO:0045619	regulation of lymphocyte differentiation	110/5019	210/18903	1.24759725576325e-15	1.85514810543029e-13	1.35418512412589e-13	TCF7/MYB/IL4R/IL23A/ZFP36L1/FCRL3/CD28/GATA3/NFKBID/IFNG/IL7R/CD27/RASGRP1/IKZF3/SMARCC1/CAMK4/PRKDC/RARA/DROSHA/CD2/XBP1/JUNB/CRTAM/ZC3H12A/SLC46A2/KAT2A/CLPTM1/SART1/SLAMF8/LILRB2/LEF1/CARD11/IRF4/TBX21/SMAD7/BTN2A2/ID2/SASH3/IRF1/ACTL6A/SMARCA4/TGFBR2/ZAP70/IL15/ADAM8/ABL1/LILRB4/PHF10/SMARCE1/STAT5B/CR1/CTLA4/RUNX3/PRDM1/BCL6/SOX4/IL18/PGLYRP1/ZC3H8/PBRM1/CD83/SOCS5/XRCC6/CBFB/ITPKB/SMARCA2/S…	110
BP	GO:0002699	positive regulation of immune effector process	129/5019	261/18903	1.80021235179873e-15	2.61603585850024e-13	1.90960324590324e-13	BLK/CD177/MYB/IL4R/IL23A/NCR3/DDX1/CD28/GATA3/NFKBID/MYD88/FFAR2/CD40/IFNG/RPS19/KIR2DL4/SH2D1B/XCL1/KIT/IL6/RASGRP1/VAV1/SLAMF1/RARA/STXBP2/XBP1/CD160/VAMP8/LILRB1/CRTAM/KLRD1/MSH2/FGR/TNFRSF14/TNF/HMOX1/TBX21/SASH3/ITGB2/CD55/RAC2/SPI1/NOD2/KLRC4/FCN1/CD226/STAT5B/KLRC2/ANKRD17/CR1/TP53BP1/BCL10/RABGEF1/RIF1/MIF/IL18/SLAMF6/KLRC3/SOCS5/DENND1B/ITGAM/CLEC7A/MLH1/IL18R1/FCER2/EXOSC6/LYN/FER/PHB2/…	129
BP	GO:0045785	positive regulation of cell adhesion	208/5019	484/18903	1.98237109005698e-15	2.81672905551652e-13	2.05610138323103e-13	SIRPG/ADAM19/CCR7/HLA-DOB/TNFSF14/CD6/CD5/OLFM4/C1QBP/MYB/IL4R/IL23A/LCK/CDK6/CD28/TNFRSF13C/GATA3/SPOCK2/NFKBID/FCHO1/CD40LG/IFNG/FLOT2/EPHA4/CD3E/XCL1/DNM2/IL7R/IL6/IL1A/CD27/CD274/RASGRP1/CALR/VAV1/IFT74/SMARCC1/SLAMF1/RARA/HES1/XBP1/CD160/LILRB1/MYO10/PTPN11/ARL2/ICOS/RPS3/TNFRSF14/BMI1/SART1/TNF/ETS1/LILRB2/LEF1/SKAP1/SIRPB1/CARD11/PRKD2/SMAD7/BTN2A2/SASH3/ACTL6A/ALOX5/SMARCA4/ITGB2/CD55/TGF…	208
BP	GO:0045088	regulation of innate immune response	121/5019	240/18903	2.05513391171779e-15	2.85663613728773e-13	2.08523198273608e-13	N4BP1/NCR3/FPR2/FFAR2/ZBP1/RPS19/MATR3/KIR2DL4/SH2D1B/KIR2DS2/SLC15A4/RASGRP1/UBE2K/VAV1/APPL1/NCR1/PRKDC/NR1H2/CD160/LILRB1/CRTAM/KLRD1/PTPN11/POLR3D/CLEC6A/ZDHHC18/FGR/ZNFX1/TRAFD1/SLAMF8/NLRC4/NLRC5/KLRC1/IRF1/SERPINB9/KLRB1/YTHDF2/CNOT7/CEACAM1/RNF185/POLR3C/SPI1/CASP6/ADAM8/TLR8/NOD2/LILRA2/KLRC4/FCN1/CD226/BIRC3/STAT5B/KLRC2/CR1/PARP1/HCK/DHX9/SLAMF6/AKIRIN2/KLRC3/ARRB2/XRCC6/GRN/CLEC7A/PTP…	121
BP	GO:0097529	myeloid leukocyte migration	121/5019	242/18903	4.5303593633039e-15	6.16321654658832e-13	4.49890558049037e-13	CCR7/CD177/C1QBP/IL23A/FPR2/XCL2/CXCR1/MYD88/RPS19/CYP19A1/XCL1/C5AR2/KIT/IL6/IL1A/WDR1/CNN2/VAV1/SLAMF1/PPIA/CXCR2/SLAMF8/MAPK3/PIK3CD/CMKLR1/CXCL5/ITGB2/C5/PF4/RAC2/SIRPA/EDN1/SPI1/DPP4/PF4V1/ADAM8/CCR1/NOD2/CREB3/C5AR1/RHOG/CD99/CCL20/STAT5B/B4GALT1/DNM1L/S100A12/RIN3/RABGEF1/DUSP1/DAPK2/PLCB1/PPBP/MIF/PLA2G7/MIR128-1/PTK2B/PIKFYVE/CCL4/PECAM1/CXCL1/LYN/CX3CR1/FCER1G/ITGA1/HMGB1/TNFAIP6/MAPK1/…	121
BP	GO:0071216	cellular response to biotic stimulus	127/5019	261/18903	1.34151494646115e-14	1.78700970159846e-12	1.30444677030893e-12	CD6/NFKBIB/PPARD/MYD88/CDK4/TNIP1/IL6/IL1A/CD274/RARA/XBP1/LITAF/LILRB1/ZC3H12A/IRAK2/CDA/TNF/LILRB2/MAPK3/NR1D1/MAP2K3/CXCL5/LY96/CD55/TLR1/BCL2L11/PF4/SIRPA/TNFRSF1B/SPI1/PF4V1/GSTP1/UPF1/NOD2/PAF1/LILRA2/SBNO2/ABL1/CD14/ZFP36/PRPF8/CARD16/BCL10/HCK/PPBP/MIF/IL18/MIR128-1/AKT1/CLEC7A/EIF2AK3/RELA/TSPO/SASH1/CXCL1/LYN/LTF/PDCD1LG2/SCARB1/CCR5/FCGR2B/CX3CR1/ARG1/ADAM9/MAPK8/HMGB1/TXNIP/MAPK14/MAP…	127
BP	GO:0030595	leukocyte chemotaxis	119/5019	240/18903	1.65136424479819e-14	2.15486183290604e-12	1.57296435261765e-12	CCR7/TNFSF14/C1QBP/IL23A/FPR2/XCL2/CXCR1/FFAR2/GPR18/CXCL16/RPS19/PADI2/CYP19A1/GPSM3/XCL1/C5AR2/KIT/IL6/CXCR5/CALR/VAV1/SLAMF1/PPIA/CXCR2/SLAMF8/MAPK3/PIK3CD/CMKLR1/S1PR1/NINJ1/CXCL5/ALOX5/ITGB2/C5/PF4/RAC2/IL16/EDN1/SPI1/DPP4/PF4V1/ADAM8/CCR1/NOD2/CREB3/C5AR1/NEDD9/CCL20/DNM1L/S100A12/RIN3/DUSP1/DAPK2/PPBP/MIF/PLA2G7/PTK2B/PIKFYVE/CCL4/CXCL1/LYN/CCR5/CX3CR1/FCER1G/ITGA1/HMGB1/TNFAIP6/OXSR1/MAPK…	119
BP	GO:0032944	regulation of mononuclear cell proliferation	120/5019	243/18903	1.86418866700227e-14	2.38392446736251e-12	1.74017106305012e-12	BLK/CD22/CD6/IL23A/FCRL3/CD28/TNFRSF13C/MYD88/CD40/CD40LG/CD3E/XCL1/IL6/IL1A/CD274/IKZF3/GLMN/ZNF335/SLAMF1/HES1/LILRB1/RASSF5/CRTAM/TNFRSF9/RPS3/TNFRSF14/PDE5A/BMI1/LILRB2/CARD11/BTN2A2/SASH3/IRF1/FCGR3A/CD55/SLC39A10/TGFBR2/TWSG1/RAC2/TNFRSF1B/ZAP70/IL15/ST6GAL1/LILRB4/STAT5B/CR1/CTLA4/BCL6/MIF/IL18/SPN/DHPS/TNFSF8/GPAM/LYN/PDCD1LG2/FCGR2B/CD38/TYK2/ADA/ARG1/ZBTB7B/HMGB1/TYROBP/IL1B/CCL5/NCK2/I…	120
BP	GO:0042098	T cell proliferation	108/5019	212/18903	2.67047364552926e-14	3.34804088029688e-12	2.44393811027383e-12	TNFSF14/CD6/IL23A/CD28/TNFRSF13C/CD40LG/SLC11A1/CD3E/XCL1/IL6/IL1A/CD274/RASGRP1/RPS6/GLMN/SLAMF1/HES1/LILRB1/CRTAM/TNFRSF9/SH2D2A/RPS3/TNFRSF14/PDE5A/BMI1/LILRB2/CARD11/BTN2A2/SASH3/BTN3A1/IRF1/CD55/TGFBR2/TWSG1/RAC2/TNFRSF1B/ZAP70/IL15/CTPS1/ABL1/LILRB4/CCND3/STAT5B/CR1/CTLA4/BCL6/IL18/SPN/DHPS/TNFSF8/GPAM/FYN/PDCD1LG2/TYK2/ARG1/ZBTB7B/HMGB1/IL1B/CCL5/NCK2/MSN/IL6ST/RIPK3/HLA-E/DLG1/PRKAR1A/SLC…	108
BP	GO:0045580	regulation of T cell differentiation	95/5019	179/18903	3.74786677897196e-14	4.60843465091284e-12	3.36397597124731e-12	TCF7/MYB/IL4R/IL23A/CD28/GATA3/NFKBID/IFNG/IL7R/CD27/RASGRP1/SMARCC1/CAMK4/RARA/DROSHA/CD2/XBP1/JUNB/CRTAM/ZC3H12A/SLC46A2/KAT2A/CLPTM1/SART1/LILRB2/LEF1/CARD11/IRF4/TBX21/SMAD7/BTN2A2/SASH3/IRF1/ACTL6A/SMARCA4/TGFBR2/ZAP70/IL15/ADAM8/ABL1/LILRB4/PHF10/SMARCE1/STAT5B/CR1/CTLA4/RUNX3/PRDM1/BCL6/SOX4/IL18/ZC3H8/PBRM1/CD83/SOCS5/CBFB/ITPKB/SMARCA2/SMARCD3/EGR3/METTL3/BRD7/BATF/ARID1B/ADA/SMARCB1/ZBT…	95
BP	GO:0002831	regulation of response to biotic stimulus	161/5019	361/18903	7.1329194985937e-14	8.59906291072397e-12	6.27697758526087e-12	C1QBP/N4BP1/IL23A/NCR3/FPR2/FFAR2/ZBP1/EIF2AK4/RPS19/MATR3/KIR2DL4/SH2D1B/KIR2DS2/OASL/SLC15A4/CD274/RASGRP1/UBE2K/VAV1/APPL1/MIAT/NCR1/PRKDC/NR1H2/CD160/LILRB1/CRTAM/KLRD1/ZC3H12A/MICB/PTPN11/POLR3D/CLEC6A/ZDHHC18/FGR/ZNFX1/TRAFD1/SLAMF8/MAPK3/NLRC4/NLRC5/KLRC1/IRF1/LY96/SERPINB9/KLRB1/YTHDF2/CNOT7/CEACAM1/CD55/RNF185/POLR3C/IL15/SPI1/CASP6/ADAM8/TLR8/NOD2/LILRA2/KLRC4/FCN1/CD14/CD226/BIRC3/STAT…	161
BP	GO:1903706	regulation of hemopoiesis	179/5019	413/18903	7.26226770689857e-14	8.59906291072397e-12	6.27697758526087e-12	TCF7/MYB/IL4R/IL23A/ZFP36L1/FCRL3/CDK6/CD28/GATA3/NFKBID/IFNG/IL7R/GPR137B/CD27/RASGRP1/LILRB3/IKZF3/SMARCC1/CAMK4/PRKDC/RARA/DROSHA/CD2/XBP1/JUNB/LILRB1/CRTAM/ZC3H12A/SLC46A2/KAT2A/CLPTM1/SART1/TNF/PRMT1/ETS1/SLAMF8/LILRB2/CD101/LEF1/CARD11/IRF4/TBX21/SMAD7/BTN2A2/ID2/SASH3/IRF1/ACTL6A/SMARCA4/CEACAM1/TGFBR2/PF4/ZAP70/IL15/ZNF675/MEAF6/SPI1/ADAM8/HSPA1A/CCR1/PAF1/HCLS1/HSPA1B/ABL1/LILRB4/PHF10/N…	179
BP	GO:0019221	cytokine-mediated signaling pathway	207/5019	496/18903	8.37859782110484e-14	9.74050081238988e-12	7.11018234235002e-12	IL21R/TRAF1/FLT3/CCR7/LILRA4/IL4R/EXT1/CCRL2/TNFRSF13C/IL2RB/XCL2/CXCR1/MYD88/CXCR3/ZBP1/IFNG/PADI2/OASL/IL1RN/XCL1/KIT/IL7R/IL6/IL1A/LILRB3/UBE2K/CXCR5/APPL1/LILRA5/NR1H2/LILRB1/CSNK2B/OTUD4/PTPN11/IRAK2/CXCR2/IL18RAP/TNFRSF14/CXCR6/TNF/COMMD7/LILRA1/IL10RA/LILRB2/MAPK3/CMKLR1/NLRC5/CXCL5/IRF1/CCR3/PRKACA/YTHDF2/CNOT7/UGCG/CEACAM1/RNF185/TMSB4X/PF4/TNFRSF1B/IL15/EDN1/ZNF675/IFITM2/IFITM1/SPI1/PF…	207
BP	GO:0050670	regulation of lymphocyte proliferation	117/5019	239/18903	8.58825340001022e-14	9.80594504279739e-12	7.15795405557243e-12	BLK/CD22/CD6/IL23A/FCRL3/CD28/TNFRSF13C/MYD88/CD40/CD40LG/CD3E/XCL1/IL6/IL1A/CD274/IKZF3/GLMN/ZNF335/SLAMF1/HES1/LILRB1/RASSF5/CRTAM/TNFRSF9/RPS3/TNFRSF14/PDE5A/BMI1/LILRB2/CARD11/BTN2A2/SASH3/IRF1/FCGR3A/CD55/SLC39A10/TGFBR2/TWSG1/RAC2/TNFRSF1B/ZAP70/IL15/LILRB4/STAT5B/CR1/CTLA4/BCL6/MIF/IL18/SPN/DHPS/TNFSF8/GPAM/LYN/PDCD1LG2/FCGR2B/CD38/TYK2/ADA/ARG1/ZBTB7B/HMGB1/TYROBP/IL1B/CCL5/NCK2/IL6ST/RIP…	117
BP	GO:0002706	regulation of lymphocyte mediated immunity	94/5019	179/18903	1.18566528560626e-13	1.33002523441517e-11	9.7086608982053e-12	CR2/IL23A/NCR3/CD28/GATA3/CD40/KIR2DL4/SH2D1B/XCL1/IL7R/IL6/SLC15A4/HFE/RASGRP1/VAV1/NCR1/SLAMF1/CD160/LILRB1/CRTAM/KLRD1/MSH2/THOC1/WAS/TNF/TBX21/SMAD7/SASH3/KLRC1/CR1L/SERPINB9/KLRB1/CEACAM1/CD55/TNFRSF1B/NOD2/KLRC4/LILRB4/CD226/STAT5B/KLRC2/CR1/TP53BP1/BCL6/RIF1/IL18/SLAMF6/KLRC3/ARRB2/DENND1B/MLH1/IL18R1/FCER2/EXOSC6/FCGR2B/ARG1/HMGB1/IL1B/MR1/AP1G1/TAP2/APLF/RIPK3/IL1R1/HLA-E/HLA-F/NLRP3/PTP…	94
BP	GO:0002822	regulation of adaptive immune response based on somatic recombination of immune receptors built from immunoglobulin superfamily domains	95/5019	182/18903	1.42155081344755e-13	1.567137224342e-11	1.14394851303565e-11	CR2/IL4R/IL23A/CD28/GATA3/NFKBID/CD40/SLC11A1/XCL1/IL7R/IL6/SLC15A4/HFE/CD274/SLAMF1/JUNB/LILRB1/KLRD1/ZC3H12A/MSH2/THOC1/CLEC6A/WAS/TNF/TBX21/SMAD7/SASH3/KLRC1/CR1L/CEACAM1/CD55/TNFRSF1B/NOD2/LILRB4/CD226/CR1/TP53BP1/BCL6/RIF1/IL18/SOCS5/DENND1B/CLEC7A/MLH1/IL18R1/FCER2/EXOSC6/FCGR2B/BATF/TYK2/ADA/ARG1/ZBTB7B/HMGB1/CD4/IL1B/NFKBIZ/MR1/TAP2/APLF/RIPK3/IL1R1/HLA-E/HLA-F/NLRP3/JAK3/PTPRC/CCR2/HLA-A…	95
BP	GO:0002685	regulation of leukocyte migration	113/5019	231/18903	2.42131745058153e-13	2.62405148796921e-11	1.91545434003185e-11	CCR7/TNFSF14/C1QBP/IL23A/FPR2/XCL2/MYD88/CXCR3/GPR18/PADI2/CYP19A1/GPSM3/XCL1/C5AR2/IL6/IL1A/CNN2/CALR/SLAMF1/STK10/CXCR2/TNFRSF14/TNF/SLAMF8/MAPK3/HMOX1/CMKLR1/C5/RAC2/ICAM1/EDN1/SPI1/DPP4/ADAM8/CCR1/NOD2/CREB3/C5AR1/ITGB3/ABL1/RHOG/NEDD9/CD99/CCL20/DNM1L/RIN3/RABGEF1/DUSP1/DAPK2/PLCB1/MIF/SPN/PLA2G7/MIR128-1/AKT1/CHST2/GP1BA/PTK2B/SPNS2/CCL4/ITGA4/LYN/CX3CR1/ADA/HMGB1/TNFAIP6/OXSR1/MAPK1/CCR6/C…	113
BP	GO:0050854	regulation of antigen receptor-mediated signaling pathway	46/5019	66/18903	2.8931407607075e-13	3.08312367066062e-11	2.25055897069773e-11	CCR7/BLK/CD22/FCRL3/LCK/UBASH3A/CD160/RPS3/CARD11/PRKD2/BTN2A2/CEACAM1/SLC39A10/LILRB4/PHPT1/CD226/BCL10/PVRIG/PLCL2/RELA/LYN/FCGR2B/CD19/ADA/KCNN4/NFAM1/PTPRJ/ELF1/GBP1/PRKCH/LGALS3/PTPRC/EZR/CD300A/GCSAML/RC3H1/LAPTM5/MALT1/PRKCB/CBLB/PRNP/TRAT1/PTPN6/DUSP22/PTPN22/STAP1	46
BP	GO:0031341	regulation of cell killing	62/5019	102/18903	3.51942504886534e-13	3.68904979712212e-11	2.69286120218618e-11	IL23A/NCR3/IFNG/KIR2DL4/XCL1/IL7R/RASGRP1/VAV1/NCR1/CD160/LILRB1/CRTAM/KLRD1/KLRC1/CR1L/SERPINB9/KLRB1/CEACAM1/CD55/ICAM1/SPI1/KLRC4/CD226/STAT5B/KLRC2/HSP90AB1/SLAMF6/KLRC3/ARRB2/ITGAM/CLEC7A/FCER2/PRF1/FCGR2B/CX3CR1/ARG1/MAPK8/TYROBP/MR1/AP1G1/TAP2/RIPK3/HLA-E/HLA-F/PTPRC/PIK3R6/HLA-A/HLA-B/CD1D/F2RL1/IL12RB1/CD59/HAVCR2/CLEC12B/HLA-H/BCL2L1/SYK/STX7/LGALS9/P2RX7/CD1C/STAP1	62
BP	GO:0071222	cellular response to lipopolysaccharide	109/5019	222/18903	4.70796542858076e-13	4.85527918553958e-11	3.5441627691557e-11	CD6/NFKBIB/PPARD/MYD88/CDK4/TNIP1/IL6/IL1A/CD274/RARA/XBP1/LITAF/LILRB1/ZC3H12A/IRAK2/TNF/LILRB2/MAPK3/NR1D1/MAP2K3/CXCL5/LY96/CD55/PF4/SIRPA/TNFRSF1B/SPI1/PF4V1/GSTP1/UPF1/NOD2/PAF1/LILRA2/SBNO2/ABL1/CD14/ZFP36/PRPF8/CARD16/BCL10/HCK/PPBP/MIF/IL18/MIR128-1/AKT1/RELA/TSPO/SASH1/CXCL1/LYN/LTF/PDCD1LG2/SCARB1/CCR5/CX3CR1/ARG1/ADAM9/MAPK8/HMGB1/MAPK14/MAPK1/IL1B/CCL5/SCIMP/PLSCR3/KMO/BCR/CASP1/NFKBI…	109
BP	GO:0001909	leukocyte mediated cytotoxicity	75/5019	134/18903	5.15311314009847e-13	5.23000085996661e-11	3.8176948476519e-11	IL23A/NCR3/SLAMF7/MYD88/KIR3DL1/KIR2DL4/XCL1/IL7R/GZMM/RASGRP1/VAV1/NCR1/STXBP2/CD2/CD160/LILRB1/CRTAM/KLRD1/KLRC1/SERPINB9/KLRB1/FCGR3A/CEACAM1/ICAM1/RNF19B/SPI1/HPRT1/KLRC4/CD226/STAT5B/KLRC2/TUBB/GZMB/IL18/SLAMF6/KLRC3/ARRB2/ITGAM/CTSH/PRF1/FCGR2B/CX3CR1/ARG1/TYROBP/TREM1/MR1/AP1G1/TAP2/RIPK3/HLA-E/HLA-F/PTPRC/PIK3R6/HLA-A/NKG7/HLA-B/PLEKHM2/CD1D/PRDX1/F2RL1/IL12RB1/FCGR1A/HAVCR2/CORO1A/CLEC12…	75
BP	GO:0050852	T cell receptor signaling pathway	77/5019	139/18903	5.2396397296233e-13	5.23472756737678e-11	3.82114515808383e-11	CCR7/LCK/CD28/GATA3/UBASH3A/ITK/NFKBID/FCHO1/TEC/CD3E/CD8B/RBCK1/STOML2/THEMIS/CD160/BTN2A1/ZC3H12A/CD247/RPS3/CD3G/PIK3CD/CD8A/SKAP1/CARD11/PRKD2/BTN2A2/BTN3A1/CEACAM1/ZAP70/LCP2/ABL1/LILRB4/PHPT1/CD226/KHDRBS1/BCL10/CTLA4/PVRIG/DENND1B/THEMIS2/EIF2B3/RELA/BTN3A3/FYN/BTN3A2/CSK/ADA/KCNN4/PLCG1/PTPRJ/MAPK1/NFKBIZ/CD3D/ELF1/GBP1/LGALS3/PTPRC/HLA-A/EZR/PLCG2/CD300A/RC3H1/LAPTM5/WNK1/MALT1/PSEN1/CBL…	77
BP	GO:0046634	regulation of alpha-beta T cell activation	67/5019	115/18903	6.91022791394275e-13	6.79753804334615e-11	4.96193531504812e-11	MYB/ADORA2A/IL4R/IL23A/CD28/GATA3/NFKBID/IFNG/CD3E/XCL1/HFE/CD274/RARA/CD160/JUNB/LILRB1/CRTAM/ZC3H12A/TNFRSF14/CARD11/IRF4/TBX21/SMAD7/SASH3/IRF1/CD55/TGFBR2/TWSG1/ZAP70/LILRB4/RUNX3/PRDM1/BCL6/IL18/CD83/SOCS5/CBFB/ITPKB/BATF/TYK2/ADA/ZBTB7B/HMGB1/NFKBIZ/HLA-E/NLRP3/JAK3/PTPRC/CCR2/HLA-A/LGALS9C/ZBTB16/CD300A/SH3RF1/RC3H1/LGALS9B/IL2RG/MALT1/IL12RB1/HSPH1/CD86/SYK/CBLB/TARM1/HLX/LGALS9/PTPN22	67
BP	GO:0042274	ribosomal small subunit biogenesis	51/5019	78/18903	7.44730973756344e-13	7.2148634033304e-11	5.26656640771233e-11	NPM1/RPS17/RPS19/RPS24/NOB1/TSR1/SRFBP1/WDR43/RPS6/DCAF13/NOL11/HEATR1/PRKDC/RPS21/NOP14/RPS8/RPS25/RPSA/RPP40/WDR3/BMS1/NAT10/LTV1/RPS5/UTP6/RPS7/RPL38/MRPS11/UTP3/IMP4/ERAL1/MRPS7/IMP3/MPHOSPH10/NOL10/DDX52/UTP20/NGDN/DHX37/NOM1/KRI1/RPS16/BYSL/RIOK1/RIOK3/XRCC5/RIOK2/RCL1/RPS14/RRS1/RPS28	51
BP	GO:1990266	neutrophil migration	73/5019	130/18903	8.40854162671645e-13	8.02450972555597e-11	5.85757636651386e-11	CCR7/CD177/C1QBP/IL23A/XCL2/CXCR1/MYD88/XCL1/C5AR2/IL1A/WDR1/VAV1/PPIA/CXCR2/SLAMF8/PIK3CD/CXCL5/ITGB2/PF4/RAC2/EDN1/DPP4/PF4V1/ADAM8/NOD2/C5AR1/RHOG/CD99/CCL20/DNM1L/S100A12/DAPK2/PPBP/PIKFYVE/CCL4/PECAM1/CXCL1/FCER1G/ITGA1/TNFAIP6/IL1B/CCL5/TREM1/PREX1/BST1/IL1R1/MCU/S100A8/CCL4L1/LGALS3/S100A9/CSF3R/JAGN1/ITGA9/IRAK4/PPIB/CCL3/MOSPD2/CKLF/FUT7/CCL3L3/RHOH/SYK/MPP1/PIK3CG/CXCL9/JAM3/MCOLN2/PDE4…	73
BP	GO:0050851	antigen receptor-mediated signaling pathway	119/5019	252/18903	1.23476312058681e-12	1.1610404989753e-10	8.47513881839304e-11	CCR7/BLK/CD22/MS4A1/FCRL3/LCK/CD28/GATA3/UBASH3A/CD79A/ITK/NFKBID/FCHO1/TEC/CD3E/CD8B/RBCK1/STOML2/THEMIS/CD160/BTN2A1/ZC3H12A/SH2B2/CD247/RPS3/PLEKHA1/CD3G/PIK3CD/CD8A/SKAP1/CARD11/PRKD2/BTN2A2/BTN3A1/CEACAM1/SLC39A10/ZAP70/LCP2/ABL1/LILRB4/PHPT1/CD226/KHDRBS1/BCL10/CTLA4/PVRIG/DENND1B/THEMIS2/EIF2B3/PLCL2/RELA/BTN3A3/LYN/FYN/FCGR2B/CD38/BTN3A2/BMX/CSK/CD19/ADA/KCNN4/NFAM1/PLCG1/IGHM/IGHV2-26/PT…	119
BP	GO:1903557	positive regulation of tumor necrosis factor superfamily cytokine production	64/5019	109/18903	1.38172800803615e-12	1.28040128744683e-10	9.34642561042303e-11	IL23A/MYD88/IFNG/IL6/IL1A/RASGRP1/LILRA5/CD2/HDAC2/PTPN11/SASH3/LY96/FCGR3A/TLR1/PF4/ADAM8/NOD2/LILRA2/CD14/BCL10/LRRK2/MIF/DHX9/SPN/CLU/MMP8/CLEC7A/ORM1/HMGB1/PTPRJ/TYROBP/ORM2/OAS1/HLA-E/MAVS/NOD1/PTPRC/CCR2/CYBB/PTAFR/HSPB1/C1QTNF4/PLCG2/STAT3/TMEM106A/CCL3/TLR4/PSEN1/OAS3/IFIH1/HAVCR2/CD86/PIK3R1/ARID5A/IFNGR1/SYK/OAS2/THBS1/APP/CYBA/CD36/TLR2/LGALS9/AZU1	64
BP	GO:0071219	cellular response to molecule of bacterial origin	112/5019	234/18903	1.89199679499453e-12	1.72820392959929e-10	1.26152087052718e-10	CD6/NFKBIB/PPARD/MYD88/CDK4/TNIP1/IL6/IL1A/CD274/RARA/XBP1/LITAF/LILRB1/ZC3H12A/IRAK2/TNF/LILRB2/MAPK3/NR1D1/MAP2K3/CXCL5/LY96/CD55/TLR1/PF4/SIRPA/TNFRSF1B/SPI1/PF4V1/GSTP1/UPF1/NOD2/PAF1/LILRA2/SBNO2/ABL1/CD14/ZFP36/PRPF8/CARD16/BCL10/HCK/PPBP/MIF/IL18/MIR128-1/AKT1/RELA/TSPO/SASH1/CXCL1/LYN/LTF/PDCD1LG2/SCARB1/CCR5/FCGR2B/CX3CR1/ARG1/ADAM9/MAPK8/HMGB1/MAPK14/MAPK1/IL1B/CCL5/SCIMP/PLSCR3/KMO/BCR…	112
BP	GO:0097530	granulocyte migration	83/5019	158/18903	3.10835356703589e-12	2.79926939544049e-10	2.04335651834502e-10	CCR7/CD177/C1QBP/IL23A/XCL2/CXCR1/MYD88/XCL1/C5AR2/IL1A/WDR1/VAV1/SLAMF1/PPIA/CXCR2/SLAMF8/MAPK3/PIK3CD/CMKLR1/CXCL5/ITGB2/PF4/RAC2/EDN1/DPP4/PF4V1/ADAM8/NOD2/C5AR1/RHOG/CD99/CCL20/DNM1L/S100A12/DAPK2/PPBP/PIKFYVE/CCL4/PECAM1/CXCL1/FCER1G/ITGA1/TNFAIP6/MAPK1/IL1B/CCL5/TREM1/PREX1/BST1/IL1R1/MCU/S100A8/CCL4L1/LGALS3/S100A9/IL17RA/CSF3R/JAGN1/CD300A/ITGA9/IRAK4/PPIB/CCL3/MOSPD2/CKLF/CSF1R/FUT7/CCL3…	83
BP	GO:0042113	B cell activation	152/5019	350/18903	4.60465822554892e-12	4.08919231863331e-10	2.98494949884268e-10	FCRL1/FLT3/BLK/CD22/CR2/MS4A1/ZFP36L1/FCRL3/CD28/TNFRSF13C/CD79A/CD40/CD40LG/PAX5/KIT/IL7R/IL6/SLC15A4/CD27/RASGRP1/CXCR5/IKZF3/PRKDC/POU2AF1/XBP1/MSH2/THOC1/TOP2B/BMI1/MSH6/BCL3/SLAMF8/LEF1/PIK3CD/CARD11/TBX21/PHF14/UNG/ID2/SASH3/SLC25A5/SLC39A10/ZAP70/CTPS1/SPI1/ERCC1/TXLNA/NOD2/ABL1/STAT5B/PRKCD/CR1/TP53BP1/LFNG/CTLA4/BCL6/RIF1/MIF/AKIRIN2/THEMIS2/TBC1D10C/PTK2B/PLCL2/MLH1/EXOSC6/ITGA4/LYN/FCG…	152
BP	GO:0016032	viral process	176/5019	421/18903	5.18749248857302e-12	4.54367492766245e-10	3.31670392131691e-10	CR2/N4BP1/CD28/WWP2/PAIP1/INPP5K/TNIP1/ST6GALNAC3/EIF2AK4/RAN/OASL/EIF3D/CHMP7/GSK3A/EIF3B/SLAMF1/PPIA/SMPD1/CCNK/VAMP8/NUCKS1/EIF2D/ZC3H12A/RCC1/VPS37C/RPSA/PCSK5/TOP2B/TNFRSF14/ZNFX1/CXCR6/TNF/PRMT1/EIF3L/LEF1/PPIH/CHMP2A/SSB/DENR/ISG20/SMARCA4/CNOT7/CD55/ST3GAL3/ICAM1/GPR15/IFITM2/IFITM1/DPP4/NPC1/CHMP1A/HSPA1A/APOBEC3A/VPS37A/HSPA1B/ITGB3/FCN1/CHMP4B/ST6GAL1/PCBP1/ZFP36/LDLR/CR1/VCP/SELPLG/TF…	176
BP	GO:0032496	response to lipopolysaccharide	148/5019	339/18903	5.41437703855107e-12	4.67831443033724e-10	3.41498546073051e-10	CCR7/ADM/CD6/NFKBIB/PPARD/ALPL/MYD88/CDK4/TNIP1/SLC11A1/THBD/IL6/IL1A/CD274/RARA/XBP1/LITAF/HDAC2/LILRB1/ZC3H12A/OTUD5/IRAK2/TNF/IL10RA/ADH5/LILRB2/MAPK3/NR1D1/MAP2K3/CXCL5/LY96/CD55/PF4/SIRPA/TNFRSF1B/EDN1/SPI1/PF4V1/GSTP1/UPF1/IL18BP/NOD2/PAF1/LILRA2/SBNO2/ABL1/CD14/ZFP36/FASLG/PRPF8/SOD2/CARD16/BCL10/HCK/PPBP/MIF/IL18/NR4A1/AKIRIN2/GJB6/MIR128-1/CSF2RB/AKT1/HNRNPA0/RELA/TSPO/SASH1/CXCL1/LYN/GC…	148
BP	GO:0006403	RNA localization	99/5019	202/18903	6.27627172457554e-12	5.35073085425814e-10	3.90582299323059e-10	XPO1/NPM1/ZFP36L1/LRPPRC/CCT2/SEH1L/RAN/CCT6A/HNRNPA1L2/CCT4/CCT8/HNRNPA1/POLR2D/CCT7/CCT3/TOMM20/SHQ1/ZNHIT6/NHP2/DKC1/THOC1/XPOT/NUP133/NCBP2/NUP107/CKAP5/PNPT1/PARN/XPO5/NDC1/FYTTD1/IGF2BP2/NXF1/NCBP1/SSB/NUP43/MVP/HNRNPAB/TGFBR2/YBX1/NUP160/NPIPA1/MAGOHB/THOC7/FLOT1/KHSRP/UPF1/EIF4A3/NOP58/ZNF385A/KHDRBS1/ZFP36/RUVBL1/MX2/NUTF2/PRPF6/DHX9/SIDT2/FBL/RBM15B/SIDT1/NSUN2/PHAX/NUP35/CETN3/CCT5/NUP…	99
BP	GO:0002449	lymphocyte mediated immunity	157/5019	367/18903	8.68200022679288e-12	7.21636823180204e-10	5.2676648732875e-10	IL21R/HLA-DOB/CR2/C1QBP/IL4R/IL23A/NCR3/CD28/SLAMF7/GATA3/MYD88/CD40/CD40LG/KIR3DL1/KIR2DL4/SH2D1B/XCL1/IL7R/IL6/SLC15A4/HFE/CD27/GZMM/RASGRP1/VAV1/NCR1/SLAMF1/CD2/CD160/LILRB1/CRTAM/KLRD1/MSH2/THOC1/WAS/TNF/MSH6/BCL3/CD8A/TBX21/SMAD7/UNG/SASH3/KLRC1/CR1L/SERPINB9/KLRB1/FCGR3A/CEACAM1/CD55/C5/ICAM1/TNFRSF1B/RNF19B/ERCC1/TLR8/HPRT1/NOD2/KLRC4/LILRB4/CD226/STAT5B/KLRC2/PRKCD/CR1/TUBB/TP53BP1/BCL10/…	157
BP	GO:0032760	positive regulation of tumor necrosis factor production	61/5019	105/18903	8.69034022284575e-12	7.21636823180204e-10	5.2676648732875e-10	IL23A/MYD88/IFNG/IL6/IL1A/RASGRP1/LILRA5/CD2/HDAC2/PTPN11/SASH3/LY96/FCGR3A/TLR1/PF4/NOD2/LILRA2/CD14/LRRK2/MIF/DHX9/SPN/CLU/MMP8/CLEC7A/ORM1/HMGB1/PTPRJ/TYROBP/ORM2/OAS1/HLA-E/MAVS/NOD1/PTPRC/CCR2/CYBB/PTAFR/HSPB1/C1QTNF4/PLCG2/STAT3/TMEM106A/CCL3/TLR4/PSEN1/OAS3/IFIH1/HAVCR2/PIK3R1/ARID5A/IFNGR1/SYK/OAS2/THBS1/APP/CYBA/CD36/TLR2/LGALS9/AZU1	61
BP	GO:0002705	positive regulation of leukocyte mediated immunity	75/5019	140/18903	9.71735495578202e-12	7.96573943426541e-10	5.81467636625337e-10	CD177/IL23A/NCR3/DDX1/CD28/GATA3/CD40/KIR2DL4/SH2D1B/XCL1/KIT/IL6/RASGRP1/VAV1/SLAMF1/CD160/CRTAM/KLRD1/MSH2/TNF/TBX21/SASH3/ITGB2/CD55/SPI1/NOD2/KLRC4/CD226/STAT5B/KLRC2/TP53BP1/RIF1/IL18/SLAMF6/KLRC3/DENND1B/ITGAM/CLEC7A/MLH1/IL18R1/FCER2/EXOSC6/ARG1/TYROBP/IL1B/SCIMP/MR1/AP1G1/TAP2/IL1R1/HLA-E/HLA-F/MAVS/NLRP3/PTPRC/PTAFR/HLA-A/PLCG2/HLA-B/CD1D/ATAD5/STAT6/MALT1/F2RL1/IL12RB1/FCGR1A/ARID5A/HLA…	75
BP	GO:0035710	CD4-positive, alpha-beta T cell activation	65/5019	115/18903	9.97147691647159e-12	8.07058524100245e-10	5.89120967989807e-10	MYB/IL4R/IL23A/CD28/GATA3/NFKBID/IFNG/CD3E/XCL1/IL6/SEMA4A/CD274/STOML2/RARA/CD160/JUNB/ZC3H12A/LY9/BCL3/LEF1/CARD11/IRF4/TBX21/RORA/SMAD7/SASH3/CD55/TGFBR2/TWSG1/RUNX3/BCL6/IL18/SPN/SLAMF6/CD83/SOCS5/CBFB/IL18R1/BATF/TCIRG1/ZBTB7B/HMGB1/NFKBIZ/NLRP3/JAK3/LGALS9C/NKG7/STAT3/ARMC5/SH3RF1/RC3H1/LGALS9B/STAT6/IL2RG/MALT1/IL12RB1/CD86/FUT7/CBLB/NKX2-3/TARM1/GPR183/HLX/LGALS9/TOX	65
BP	GO:0060326	cell chemotaxis	140/5019	319/18903	1.27621526068023e-11	1.02001504709868e-09	7.44570850770546e-10	CCR7/TNFSF14/C1QBP/IL23A/CCRL2/FPR2/XCL2/CXCR1/FFAR2/CXCR3/GPR18/CXCL16/RPS19/PADI2/CYP19A1/GPSM3/XCL1/C5AR2/KIT/IL6/CXCR5/CALR/VAV1/SLAMF1/PPIA/CXCR2/CXCR6/SLAMF8/MAPK3/LEF1/PIK3CD/CMKLR1/S1PR1/NINJ1/PRKD2/CXCL5/CCR3/ALOX5/ITGB2/C5/TMSB4X/PF4/RAC2/IL16/EDN1/SPI1/DPP4/PF4V1/ADAM8/CCR1/NOD2/CREB3/EPHB1/C5AR1/RHOG/NEDD9/CCL20/PRKCD/DNM1L/S100A12/RIN3/DUSP1/DAPK2/PPBP/MIF/PLA2G7/NR4A1/ARRB2/PTK2B/PI…	140
BP	GO:0002237	response to molecule of bacterial origin	154/5019	360/18903	1.37603835004978e-11	1.0862208901504e-09	7.92898511256753e-10	CCR7/ADM/CD6/NFKBIB/PPARD/ALPL/MYD88/CDK4/TNIP1/SLC11A1/THBD/IL6/IL1A/CD274/RARA/XBP1/LITAF/HDAC2/LILRB1/ZC3H12A/OTUD5/IRAK2/TNF/IL10RA/ADH5/LILRB2/MAPK3/NR1D1/MAP2K3/CXCL5/LY96/CD55/TLR1/PF4/SIRPA/TNFRSF1B/EDN1/SPI1/PF4V1/GSTP1/UPF1/IL18BP/NOD2/PAF1/LILRA2/SBNO2/C5AR1/ABL1/CD14/ZFP36/FASLG/PRPF8/SOD2/CARD16/BCL10/HCK/PPBP/MIF/IL18/NR4A1/AKIRIN2/GJB6/MIR128-1/CSF2RB/AKT1/HNRNPA0/RELA/TSPO/SASH1/C…	154
BP	GO:0002833	positive regulation of response to biotic stimulus	93/5019	188/18903	1.40050899956523e-11	1.09205543210001e-09	7.97157497313506e-10	NCR3/FPR2/FFAR2/ZBP1/RPS19/MATR3/KIR2DL4/SH2D1B/KIR2DS2/OASL/SLC15A4/CD274/RASGRP1/UBE2K/VAV1/MIAT/PRKDC/CD160/CRTAM/KLRD1/POLR3D/CLEC6A/ZNFX1/NLRC4/NLRC5/LY96/RNF185/POLR3C/SPI1/CASP6/ADAM8/TLR8/NOD2/LILRA2/KLRC4/FCN1/CD14/CD226/STAT5B/KLRC2/ANKRD17/HCK/MIF/DHX9/SLAMF6/AKIRIN2/KLRC3/XRCC6/GRN/CLEC7A/PUM2/SASH1/LYN/FYN/SFPQ/POLR3G/ARG1/HMGB1/FCN2/TYROBP/CCL5/SCIMP/PLSCR1/MR1/CREBBP/AP1G1/PARP9/HL…	93
BP	GO:0001906	cell killing	93/5019	189/18903	2.04338899718126e-11	1.5741481021659e-09	1.14906617799641e-09	IL23A/NCR3/SLAMF7/MYD88/IFNG/RPS19/KIR3DL1/KIR2DL4/XCL1/IL7R/GZMM/RASGRP1/VAV1/NCR1/STXBP2/CD2/CD160/LILRB1/CRTAM/KLRD1/RPL30/GNLY/KLRC1/CR1L/SERPINB9/KLRB1/FCGR3A/CEACAM1/CD55/ICAM1/RNF19B/SPI1/HPRT1/KLRC4/CD226/STAT5B/KLRC2/S100A12/TUBB/HSP90AB1/GZMB/IL18/SLAMF6/PGLYRP1/KLRC3/ARRB2/ITGAM/CLEC7A/CTSH/FCER2/PRF1/LTF/FCGR2B/CX3CR1/ARG1/MAPK8/TYROBP/TREM1/MR1/AP1G1/TAP2/RIPK3/HLA-E/HLA-F/PTPRC/PIK3…	93
BP	GO:0046632	alpha-beta T cell differentiation	65/5019	117/18903	2.80749410262373e-11	2.13703777287811e-09	1.55995349010446e-09	MYB/IL4R/IL23A/GATA3/ITK/NFKBID/IFNG/GPR18/RPL22/EOMES/BCL11B/IL6/SEMA4A/RARA/JUNB/ZC3H12A/LY9/BCL3/LEF1/IRF4/TBX21/RORA/SMAD7/SASH3/IRF1/TGFBR2/ZAP70/ABL1/LILRB4/RUNX3/PRDM1/BCL6/IL18/SPN/SLAMF6/CD83/SOCS5/CBFB/TNFSF8/ITPKB/IL18R1/BATF/ADA/ZBTB7B/HMGB1/NFKBIZ/NLRP3/JAK3/ZBTB16/STAT3/ARMC5/SH3RF1/RC3H1/STAT6/IL2RG/MALT1/IL12RB1/CD86/FUT7/SYK/NKX2-3/GPR183/HLX/LGALS9/TOX	65
BP	GO:0050777	negative regulation of immune response	93/5019	190/18903	2.96628896949803e-11	2.23134725540828e-09	1.62879570164139e-09	CR2/IL4R/RPS19/KIR2DL4/WDR41/XCL1/IL7R/HFE/SLAMF1/NR1H2/CD160/LILRB1/KLRD1/ZC3H12A/THOC1/ZDHHC18/FGR/TNFRSF14/TRAFD1/SLAMF8/RHBDF2/HMOX1/TBX21/SMAD7/NLRC5/KLRC1/CR1L/SERPINB9/YTHDF2/CNOT7/PSMA1/CEACAM1/CD55/SPI1/NOD2/LILRB4/CR1/PARP1/RABGEF1/CTLA4/BCL6/HCK/PGLYRP1/ARRB2/SOCS5/GRN/SMCR8/LYN/FYN/FCGR2B/METTL3/MIR181B1/FER/ARG1/ZBTB7B/PLCG1/MAPK14/TRIM21/OAS1/PLK2/HLA-E/HLA-F/BCR/LGALS3/JAK3/PTPRC/C…	93
BP	GO:0002460	adaptive immune response based on somatic recombination of immune receptors built from immunoglobulin superfamily domains	158/5019	375/18903	3.09826864460394e-11	2.30352671088344e-09	1.68148386415837e-09	IL21R/HLA-DOB/CR2/C1QBP/IL4R/IL23A/CD28/GATA3/NFKBID/MYD88/CD40/CD40LG/NFKB2/SLC11A1/BACH2/XCL1/IL7R/IL6/SEMA4A/SLC15A4/HFE/CD27/GZMM/CD274/SLAMF1/JUNB/LILRB1/KLRD1/ZC3H12A/MSH2/THOC1/CLEC6A/WAS/LY9/TNF/MSH6/BCL3/LEF1/CD8A/IRF4/TBX21/RORA/SMAD7/UNG/SASH3/KLRC1/CR1L/FCGR3A/CEACAM1/CD55/C5/ICAM1/TNFRSF1B/ERCC1/TLR8/IL18BP/HPRT1/NOD2/LILRB4/CD226/PRKCD/CR1/TP53BP1/BCL10/BCL6/RIF1/IL18/SPN/CLU/SLAMF6…	158
BP	GO:0043299	leukocyte degranulation	49/5019	79/18903	3.6510850187811e-11	2.68333765633177e-09	1.95873091025716e-09	BLK/CD177/IL4R/KIT/RASGRP1/STXBP2/VAMP8/FGR/VAMP2/HMOX1/PIK3CD/ITGB2/FCGR3A/CEACAM1/RAC2/PTGDR/SPI1/LAT/KLRC2/RABGEF1/HCK/ITGAM/ANXA3/LYN/FCGR2B/FER/C12orf4/AP1G1/SNX4/HLA-F/BCR/GATA2/CCR2/PTAFR/NKG7/CD300A/RAB44/CCL3/F2RL1/CORO1A/SYK/CBL/SNAP23/PIK3CG/UNC13D/PRAM1/LGALS9/MILR1/NR4A3	49
BP	GO:0070665	positive regulation of leukocyte proliferation	84/5019	167/18903	4.50470849700281e-11	3.27308024202681e-09	2.38921979374527e-09	CD6/IL23A/FCRL3/CD28/TNFRSF13C/MYD88/CD40/CD40LG/CD3E/XCL1/KIT/IL6/IL1A/CD274/ZNF335/SLAMF1/HES1/RPS3/BMI1/LILRB2/MAPK3/CARD11/SASH3/FCGR3A/CD55/SLC39A10/TGFBR2/RAC2/ZAP70/IL15/ST6GAL1/STAT5B/BCL6/MIF/IL18/DHPS/CSF2RB/GPAM/LYN/PDCD1LG2/CSF2RA/CD38/MIR181B1/TYK2/ADA/HMGB1/MAPK1/IL1B/CCL5/NCK2/IL6ST/BST1/HLA-E/SLC7A1/JAK3/PTPRC/CCR2/HLA-A/CD1D/ATAD5/TLR4/CD24/IL12RB1/PELI1/CSF1R/HAVCR2/CD86/CORO1A/…	84
BP	GO:0071674	mononuclear cell migration	98/5019	206/18903	6.9394515898321e-11	4.98548915341421e-09	3.63921092245009e-09	CCR7/TNFSF14/C1QBP/EXT1/GATA3/FPR2/XCL2/CXCR1/CXCL16/RPS19/PADI2/XCL1/IL6/CALR/SLAMF1/CRTAM/STK10/CXCR2/TNFRSF14/TNF/SLAMF8/MAPK3/PIK3CD/CMKLR1/S1PR1/TBX21/NLRP12/ALOX5/ICAM1/SIRPA/ZAP70/GPR15/SPI1/ADAM8/CCR1/CREB3/C5AR1/ITGB3/ABL1/NEDD9/CD99/CCL20/S100A12/DUSP1/PLCB1/SPN/ITGAL/PLA2G7/AKT1/PTK2B/SPNS2/CCL4/ITGA4/PECAM1/LYN/CCR5/CX3CR1/HMGB1/OXSR1/MAPK1/CCR6/CCL5/MSN/SLC12A2/RIPK3/CCL4L1/LGALS3/CC…	98
BP	GO:0042129	regulation of T cell proliferation	89/5019	182/18903	8.35155545187263e-11	5.84885808552962e-09	4.26943627269617e-09	CD6/IL23A/CD28/TNFRSF13C/CD40LG/CD3E/XCL1/IL6/IL1A/CD274/GLMN/SLAMF1/HES1/LILRB1/CRTAM/TNFRSF9/RPS3/TNFRSF14/PDE5A/BMI1/LILRB2/CARD11/BTN2A2/SASH3/IRF1/CD55/TGFBR2/TWSG1/RAC2/TNFRSF1B/ZAP70/IL15/LILRB4/STAT5B/CR1/CTLA4/BCL6/IL18/SPN/DHPS/TNFSF8/GPAM/PDCD1LG2/TYK2/ARG1/ZBTB7B/HMGB1/IL1B/CCL5/NCK2/IL6ST/RIPK3/HLA-E/DLG1/PRKAR1A/SLC7A1/LGALS3/JAK3/PTPRC/CCR2/HLA-A/LGALS9C/IL10/CASP3/BID/SH3RF1/CD1D/…	89
BP	GO:0009615	response to virus	168/5019	409/18903	8.40153763787820e-11	5.84885808552962e-09	4.26943627269617e-09	C1QBP/IL23A/DDX1/EXT1/CDK6/GATA3/MYD88/CD40/ZBP1/IFNG/G3BP1/EIF2AK4/OASL/XCL1/IL6/ABCF3/SAP30BP/CALR/MAP3K14/POU2AF1/SMPD1/VAMP8/LILRB1/RPS15A/ZC3H12A/MICB/POLR3D/FGR/EEF1G/ZNFX1/URI1/TNF/BCL3/NCBP1/TBX21/NLRC5/NLRP1/IRF1/ISG20/ZMYND11/CNOT7/PRKRA/RNF185/DHX15/POLR3C/ITGAX/IL15/IFITM2/IFITM1/IRF2/TLR8/APOBEC3A/BIRC3/EXOSC5/ANKRD17/MX2/DHX9/CLU/IFNGR2/IRF9/STMN1/ATAD3A/NDUFAF4/TRIM26/IL10RB/POU2F2…	168
BP	GO:0006913	nucleocytoplasmic transport	141/5019	329/18903	8.50709730926266e-11	5.84885808552962e-09	4.26943627269617e-09	XPO1/IPO7/NPM1/DUSP16/BAG3/ABCE1/IPO5/SEH1L/IFNG/BACH2/RAN/SIRT7/XPO6/HNRNPA1/POLR2D/XPO4/CALR/APPL1/ZC3H12A/THOC1/PTPN11/XPOT/NUP133/RANBP1/NCBP2/LTV1/BCL3/CTDSPL2/NUP107/XPO5/NDC1/FYTTD1/NXF1/NCBP1/RSRC1/SSB/FBXO22/NUP43/CSE1L/PRKACA/NUP160/MAGOHB/THOC7/NMD3/UPF1/EIF4A3/RGS14/HCLS1/MDN1/KHDRBS1/PRKCD/MX2/NUTF2/HSP90AB1/LRRK2/DHX9/RBM15B/ELAVL1/AKIRIN2/NSUN2/PHAX/NUP35/NUP54/TARDBP/AKT1/RPAIN/PK…	141
BP	GO:0051169	nuclear transport	141/5019	329/18903	8.50709730926266e-11	5.84885808552962e-09	4.26943627269617e-09	XPO1/IPO7/NPM1/DUSP16/BAG3/ABCE1/IPO5/SEH1L/IFNG/BACH2/RAN/SIRT7/XPO6/HNRNPA1/POLR2D/XPO4/CALR/APPL1/ZC3H12A/THOC1/PTPN11/XPOT/NUP133/RANBP1/NCBP2/LTV1/BCL3/CTDSPL2/NUP107/XPO5/NDC1/FYTTD1/NXF1/NCBP1/RSRC1/SSB/FBXO22/NUP43/CSE1L/PRKACA/NUP160/MAGOHB/THOC7/NMD3/UPF1/EIF4A3/RGS14/HCLS1/MDN1/KHDRBS1/PRKCD/MX2/NUTF2/HSP90AB1/LRRK2/DHX9/RBM15B/ELAVL1/AKIRIN2/NSUN2/PHAX/NUP35/NUP54/TARDBP/AKT1/RPAIN/PK…	141
BP	GO:0045089	positive regulation of innate immune response	75/5019	145/18903	8.96314468268404e-11	6.09684543628529e-09	4.45045728141333e-09	NCR3/FPR2/FFAR2/ZBP1/RPS19/MATR3/KIR2DL4/SH2D1B/KIR2DS2/SLC15A4/RASGRP1/UBE2K/VAV1/PRKDC/CD160/CRTAM/KLRD1/POLR3D/CLEC6A/ZNFX1/NLRC4/NLRC5/RNF185/POLR3C/SPI1/CASP6/ADAM8/TLR8/NOD2/LILRA2/KLRC4/FCN1/CD226/STAT5B/KLRC2/HCK/DHX9/SLAMF6/AKIRIN2/KLRC3/XRCC6/CLEC7A/LYN/FYN/SFPQ/POLR3G/HMGB1/FCN2/TYROBP/CCL5/PLSCR1/CREBBP/AP1G1/PARP9/HLA-E/HLA-F/HEXIM1/IFI35/MAVS/RIOK3/XRCC5/AIM2/GBP5/PLCG2/POLR3B/MNDA/…	75
BP	GO:0002698	negative regulation of immune effector process	66/5019	122/18903	9.52657939191263e-11	6.40867209926165e-09	4.67807847622379e-09	CD22/CR2/IL4R/FCRL3/RPS19/KIR2DL4/XCL1/IL7R/HFE/APPL1/SLAMF1/LILRB1/KLRD1/ZC3H12A/THOC1/TNF/SLAMF8/HMOX1/TBX21/SMAD7/KLRC1/CR1L/SERPINB9/CEACAM1/CD55/SPI1/NOD2/LILRB4/CR1/RABGEF1/BCL6/PGLYRP1/ARRB2/SOCS5/GRN/FCGR2B/CX3CR1/FER/ARG1/ZBTB7B/ANGPT1/HLA-E/HLA-F/BCR/LGALS3/JAK3/PTPRC/CCR2/TMBIM6/HLA-A/IL10/CD300A/HLA-B/RC3H1/CD59/HAVCR2/CLEC12B/FGL2/TGFB1/CD47/HLX/LGALS9/DUSP10/PTPN6/DUSP22/EPX	66
BP	GO:0002444	myeloid leukocyte mediated immunity	60/5019	107/18903	9.62202880089331e-11	6.40867209926165e-09	4.67807847622379e-09	BLK/CD177/IL4R/DDX1/MYD88/KIT/IL6/WDR1/RASGRP1/STXBP2/VAMP8/FGR/VAMP2/HMOX1/PIK3CD/SERPINB9/ITGB2/FCGR3A/RAC2/PTGDR/SPI1/LAT/RABGEF1/ITGAM/ANXA3/LYN/FCGR2B/CX3CR1/FER/ARG1/TYROBP/C12orf4/TREM1/SNX4/HLA-E/BCR/MAVS/GATA2/CCR2/PTAFR/JAGN1/CD300A/IRAK4/RAB44/TRAF3IP2/CCL3/F2RL1/FCGR1A/NDST2/SYK/CBL/SNAP23/PIK3CG/UNC13D/PRAM1/LGALS9/MILR1/NR4A3/AZU1/STAP1	60
BP	GO:2001233	regulation of apoptotic signaling pathway	156/5019	374/18903	1.02349463169339e-10	6.74662337633766e-09	4.92476961142538e-09	TRAF1/DEDD2/ADORA2A/MAL/LCK/RPL26/GRINA/TRIM39/KDM1A/RPL11/IL1A/RBCK1/PPIA/XBP1/ITPRIP/TAF9/MAPK7/PTPMT1/RPS3/URI1/FAF1/BMI1/TNF/MMP9/TMBIM1/HMOX1/RPS7/ARMC10/SNAI1/SLC25A5/ZMYND11/PRKRA/MAZ/BCL2L11/PF4/ICAM1/CSNK2A2/TRIAP1/GSTP1/HSPA1A/CAAP1/VDAC2/CREB3/HSPA1B/NDUFS3/ZNF385A/DEPTOR/PRKCD/DNM1L/FAIM/SOD2/PARP1/BCL10/LRRK2/FXN/DAPK2/MIF/CLU/RAD9A/TNFSF12/HERPUD1/MAP2K5/PPIF/G0S2/ARRB2/PINK1/AKT1/C…	156
BP	GO:0032732	positive regulation of interleukin-1 production	46/5019	74/18903	1.29894578822597e-10	8.47495854073146e-09	6.18638627818897e-09	MYD88/IFNG/IL6/LILRA5/HDAC2/TNF/MEFV/NLRC4/NLRP12/NLRP1/IL16/TLR8/NOD2/LILRA2/CLEC7A/ORM1/HMGB1/TYROBP/ORM2/CASP1/NOD1/AIM2/NAIP/NLRP3/GBP5/HSPB1/HK1/STAT3/MNDA/TMEM106A/TLR6/CCL3/TLR4/MALT1/F2RL1/SMAD3/HAVCR2/PYHIN1/APP/TMED10/CD36/TRIM16/LGALS9/P2RX7/AZU1/EGR1	46
BP	GO:0071706	tumor necrosis factor superfamily cytokine production	91/5019	189/18903	1.47554032672125e-10	9.43460484905566e-09	6.88689032492843e-09	LILRA4/IL23A/MYD88/IFNG/GPR18/C5AR2/IL6/IL1A/CD274/RASGRP1/SLAMF1/RARA/LILRA5/CD2/HDAC2/LILRB1/ZC3H12A/PTPN11/BCL3/CLEC4A/SASH3/LY96/FCGR3A/TLR1/PF4/SIRPA/GSTP1/ADAM8/NOD2/LILRA2/LILRB4/CD14/ZFP36/BCL10/LRRK2/MIF/DHX9/SPN/CLU/ARRB2/MMP8/CLEC7A/TSPO/LTF/ORM1/CX3CR1/HMGB1/PTPRJ/TYROBP/ANGPT1/ORM2/OAS1/HLA-E/MAVS/NOD1/PTPRC/CCR2/CYBB/PTAFR/HSPB1/TNFAIP3/IL10/C1QTNF4/PLCG2/STAT3/TMEM106A/CD34/CCL3/TL…	91
BP	GO:1903555	regulation of tumor necrosis factor superfamily cytokine production	91/5019	189/18903	1.47554032672125e-10	9.43460484905566e-09	6.88689032492843e-09	LILRA4/IL23A/MYD88/IFNG/GPR18/C5AR2/IL6/IL1A/CD274/RASGRP1/SLAMF1/RARA/LILRA5/CD2/HDAC2/LILRB1/ZC3H12A/PTPN11/BCL3/CLEC4A/SASH3/LY96/FCGR3A/TLR1/PF4/SIRPA/GSTP1/ADAM8/NOD2/LILRA2/LILRB4/CD14/ZFP36/BCL10/LRRK2/MIF/DHX9/SPN/CLU/ARRB2/MMP8/CLEC7A/TSPO/LTF/ORM1/CX3CR1/HMGB1/PTPRJ/TYROBP/ANGPT1/ORM2/OAS1/HLA-E/MAVS/NOD1/PTPRC/CCR2/CYBB/PTAFR/HSPB1/TNFAIP3/IL10/C1QTNF4/PLCG2/STAT3/TMEM106A/CD34/CCL3/TL…	91
BP	GO:0032731	positive regulation of interleukin-1 beta production	41/5019	63/18903	1.64724909430779e-10	1.04282284247565e-08	7.61219643997994e-09	MYD88/IFNG/IL6/LILRA5/TNF/MEFV/NLRC4/NLRP12/NLRP1/TLR8/NOD2/LILRA2/CLEC7A/ORM1/TYROBP/ORM2/CASP1/NOD1/AIM2/NAIP/NLRP3/GBP5/HSPB1/HK1/STAT3/MNDA/TMEM106A/TLR6/CCL3/TLR4/MALT1/F2RL1/SMAD3/PYHIN1/APP/CD36/TRIM16/LGALS9/P2RX7/AZU1/EGR1	41
BP	GO:1902107	positive regulation of leukocyte differentiation	89/5019	184/18903	1.73011297426948e-10	1.07401382111447e-08	7.83987831161049e-09	MYB/IL4R/IL23A/ZFP36L1/GATA3/NFKBID/IFNG/IL7R/CD27/RASGRP1/SMARCC1/PRKDC/RARA/XBP1/SART1/TNF/LILRB2/CD101/LEF1/BTN2A2/ID2/SASH3/ACTL6A/SMARCA4/TGFBR2/PF4/ZAP70/IL15/ADAM8/CCR1/HCLS1/LILRB4/PHF10/NEDD9/SMARCE1/STAT5B/CR1/RUNX3/BCL6/SOX4/IL18/EVI2B/PBRM1/CD83/SOCS5/XRCC6/CBFB/ITPKB/SMARCA2/SMARCD3/EGR3/BRD7/ARID1B/ADA/SMARCB1/ZBTB7B/HMGB1/TYROBP/CD4/FOXO3/NFKBIZ/HAX1/PCID2/NLRP3/PTPRC/PIK3R6/SLC9B2…	89
BP	GO:1903708	positive regulation of hemopoiesis	89/5019	184/18903	1.73011297426948e-10	1.07401382111447e-08	7.83987831161049e-09	MYB/IL4R/IL23A/ZFP36L1/GATA3/NFKBID/IFNG/IL7R/CD27/RASGRP1/SMARCC1/PRKDC/RARA/XBP1/SART1/TNF/LILRB2/CD101/LEF1/BTN2A2/ID2/SASH3/ACTL6A/SMARCA4/TGFBR2/PF4/ZAP70/IL15/ADAM8/CCR1/HCLS1/LILRB4/PHF10/NEDD9/SMARCE1/STAT5B/CR1/RUNX3/BCL6/SOX4/IL18/EVI2B/PBRM1/CD83/SOCS5/XRCC6/CBFB/ITPKB/SMARCA2/SMARCD3/EGR3/BRD7/ARID1B/ADA/SMARCB1/ZBTB7B/HMGB1/TYROBP/CD4/FOXO3/NFKBIZ/HAX1/PCID2/NLRP3/PTPRC/PIK3R6/SLC9B2…	89
BP	GO:0002275	myeloid cell activation involved in immune response	55/5019	96/18903	1.89987679910282e-10	1.15189742835012e-08	8.4083980002707e-09	BLK/CD177/IL4R/MYD88/IFNG/KIT/RASGRP1/SLAMF1/STXBP2/VAMP8/FGR/VAMP2/HMOX1/PIK3CD/ITGB2/RAC2/PTGDR/SPI1/LILRA2/SBNO2/LAT/DYSF/RABGEF1/ITGAM/GRN/ANXA3/LYN/SUCNR1/CX3CR1/FER/FCER1G/TYROBP/C12orf4/SNX4/IFI35/BCR/GATA2/CCR2/PTAFR/PLCG2/CD300A/RAB44/CCL3/F2RL1/HAVCR2/SYK/CBL/SNAP23/PIK3CG/UNC13D/PRAM1/LGALS9/MILR1/PTPN6/NR4A3	55
BP	GO:0002221	pattern recognition receptor signaling pathway	90/5019	187/18903	1.90962038481565e-10	1.15189742835012e-08	8.4083980002707e-09	C1QBP/LILRA4/FCRL3/MYD88/FFAR2/TNIP1/CD40/OASL/SLC15A4/APPL1/TLR10/SLC15A3/SLC46A2/OTUD4/IRAK2/GPR108/TNF/NR1D1/MEFV/NLRC4/IRF4/NINJ1/NLRP1/IRF1/LY96/TLR5/TLR1/CLEC4E/MAP2K6/FLOT1/HSPA1A/TLR8/NOD2/LILRA2/HSPA1B/FCN1/CD14/TIFA/BIRC3/ANKRD17/BCL10/ARRB2/PUM2/RELA/LYN/LTF/TRAF3/PHB2/HMGB1/GRAMD4/FCN2/CD300LF/SCIMP/OAS1/IFI35/PIK3AP1/RIOK3/CASP1/RNF125/NOD1/NFKBIA/AIM2/UNC93B1/NAIP/NLRP3/CTSS/TNFAIP3…	90
BP	GO:0002700	regulation of production of molecular mediator of immune response	90/5019	187/18903	1.90962038481565e-10	1.15189742835012e-08	8.4083980002707e-09	CD22/IL4R/FCRL3/DDX1/CD28/GATA3/MYD88/FFAR2/CD40/CD40LG/KIR2DL4/XCL1/KIT/IL6/SLC15A4/HFE/SLAMF1/XBP1/CD160/LITAF/LILRB1/MSH2/THOC1/TNFRSF14/TNF/HMOX1/TBX21/SMAD7/SASH3/CD55/TNFRSF1B/NOD2/LILRB4/CD226/CR1/TP53BP1/BCL10/RABGEF1/BCL6/RIF1/MIF/IL18/DENND1B/CLEC7A/MLH1/IL18R1/EXOSC6/FCGR2B/PHB2/ARG1/IL1B/ANGPT1/SCIMP/APLF/IL1R1/HLA-E/HLA-F/MAVS/NOD1/NLRP3/JAK3/PTPRC/CCR2/TMBIM6/HLA-A/IL10/HK1/PLCG2/LA…	90
BP	GO:0002695	negative regulation of leukocyte activation	94/5019	198/18903	1.93867630974615e-10	1.15849498359971e-08	8.45655755771217e-09	BLK/ADORA2A/IL4R/SOCS6/XCL1/HFE/CD274/GLMN/LILRB1/RASSF5/CRTAM/ZC3H12A/THOC1/PIBF1/FGR/TNFRSF14/PDE5A/LILRB2/HMOX1/NR1D1/TBX21/SMAD7/BTN2A2/ID2/IRF1/CEACAM1/TWSG1/SPI1/LILRB4/LDLR/CR1/RABGEF1/CTLA4/RUNX3/BCL6/SPN/PGLYRP1/ZC3H8/SOCS5/CBFB/TBC1D10C/GRN/PAG1/LYN/PDCD1LG2/FCGR2B/FER/ARG1/ZBTB7B/HMGB1/TYROBP/CD300LF/HLA-F/DLG1/PRKAR1A/LST1/BCR/LGALS3/JAK3/PTPRC/CCR2/TNFAIP3/LGALS9C/IL10/CASP3/MNDA/CD3…	94
BP	GO:0050856	regulation of T cell receptor signaling pathway	32/5019	44/18903	2.10446696682023e-10	1.24592238757857e-08	9.09474320748626e-09	CCR7/LCK/UBASH3A/CD160/RPS3/CARD11/PRKD2/BTN2A2/CEACAM1/LILRB4/PHPT1/CD226/BCL10/PVRIG/RELA/ADA/KCNN4/PTPRJ/ELF1/GBP1/LGALS3/EZR/CD300A/RC3H1/LAPTM5/MALT1/CBLB/PRNP/TRAT1/PTPN6/DUSP22/PTPN22	32
BP	GO:0050866	negative regulation of cell activation	102/5019	221/18903	2.52324717977644e-10	1.46025706469009e-08	1.06593020180693e-08	BLK/ADORA2A/IL4R/SOCS6/THBD/XCL1/HFE/ABAT/CD274/GLMN/LILRB1/RASSF5/CRTAM/ZC3H12A/THOC1/PIBF1/FGR/TNFRSF14/PDE5A/LILRB2/HMOX1/NR1D1/TBX21/SMAD7/BTN2A2/ID2/IRF1/CEACAM1/TWSG1/SPI1/LILRB4/LDLR/PRKCD/CR1/RABGEF1/CTLA4/RUNX3/BCL6/SPN/PGLYRP1/ZC3H8/SOCS5/CBFB/TBC1D10C/GRN/PAG1/LYN/PDCD1LG2/FCGR2B/MIR181B1/FER/ARG1/ZBTB7B/HMGB1/TYROBP/CD300LF/HLA-F/DLG1/PRKAR1A/LST1/BCR/LGALS3/JAK3/PTPRC/CCR2/TNFAIP3/LG…	102
BP	GO:0032609	interferon-gamma production	64/5019	119/18903	2.53500991837034e-10	1.46025706469009e-08	1.06593020180693e-08	CCR7/C1QBP/IL23A/GATA3/SLC11A1/CD3E/XCL1/CD274/RASGRP1/SLAMF1/RARA/CD2/CD160/LILRB1/CRTAM/ZC3H12A/TNF/BCL3/SASH3/BTN3A1/SIRPA/TLR8/NOD2/ABL1/LILRB4/CD14/CD226/CR1/IL18/SLAMF6/PGLYRP1/CLEC7A/IL18R1/PDCD1LG2/BTN3A2/TYK2/HMGB1/IL1B/RIPK3/IL1R1/CCR2/HLA-A/LGALS9C/IL10/LAPTM5/TLR7/LGALS9B/DDIT3/TLR4/F2RL1/IL12RB1/HAVCR2/ARID5A/TXK/CD47/CD244/IL27RA/LGALS9/PDE4B/PRNP/IRF8/PTPN22/IL1RL1/INHBA	64
BP	GO:0032649	regulation of interferon-gamma production	64/5019	119/18903	2.53500991837034e-10	1.46025706469009e-08	1.06593020180693e-08	CCR7/C1QBP/IL23A/GATA3/SLC11A1/CD3E/XCL1/CD274/RASGRP1/SLAMF1/RARA/CD2/CD160/LILRB1/CRTAM/ZC3H12A/TNF/BCL3/SASH3/BTN3A1/SIRPA/TLR8/NOD2/ABL1/LILRB4/CD14/CD226/CR1/IL18/SLAMF6/PGLYRP1/CLEC7A/IL18R1/PDCD1LG2/BTN3A2/TYK2/HMGB1/IL1B/RIPK3/IL1R1/CCR2/HLA-A/LGALS9C/IL10/LAPTM5/TLR7/LGALS9B/DDIT3/TLR4/F2RL1/IL12RB1/HAVCR2/ARID5A/TXK/CD47/CD244/IL27RA/LGALS9/PDE4B/PRNP/IRF8/PTPN22/IL1RL1/INHBA	64
BP	GO:0001910	regulation of leukocyte mediated cytotoxicity	51/5019	87/18903	2.77986656790671e-10	1.58700596742817e-08	1.15845191373105e-08	IL23A/NCR3/KIR2DL4/XCL1/IL7R/RASGRP1/VAV1/NCR1/CD160/LILRB1/CRTAM/KLRD1/KLRC1/SERPINB9/KLRB1/CEACAM1/ICAM1/SPI1/KLRC4/CD226/STAT5B/KLRC2/SLAMF6/KLRC3/ARRB2/ITGAM/FCGR2B/CX3CR1/ARG1/TYROBP/MR1/AP1G1/TAP2/RIPK3/HLA-E/HLA-F/PTPRC/PIK3R6/HLA-A/HLA-B/CD1D/F2RL1/IL12RB1/HAVCR2/CLEC12B/HLA-H/STX7/LGALS9/P2RX7/CD1C/STAP1	51
BP	GO:0048872	homeostasis of number of cells	128/5019	296/18903	3.09797410400971e-10	1.75295986026886e-08	1.2795917258667e-08	FLT3/CCR7/TNFSF14/MYB/ZFP36L1/EXT1/CDK6/GATA3/RPS17/RPS19/RPS24/KIT/IL7R/IL6/SLC15A4/RPS6/PRKDC/SLC46A2/TGFBR3/PTPN11/CXCR2/PRMT1/ETS1/JMJD6/UBA5/HMOX1/PIK3CD/CARD11/ID2/SASH3/SLC25A5/BCL2L11/G6PD/MTHFD1/GCNT4/SPI1/HSPA1A/HCLS1/HSPA1B/SMAD5/ABL1/LAT/ZFP36/STAT5B/OCIAD1/ACVR2A/BCL10/TMEM14C/XKR8/BCL6/MIF/SOX4/ZC3H8/HCAR2/AKT1/SPNS2/SKIL/GPAM/FH/ITPKB/CCR4/LYN/ZNF251/CX3CR1/ADA/TCIRG1/MAFB/HMGB1/MA…	128
BP	GO:0045621	positive regulation of lymphocyte differentiation	68/5019	130/18903	3.5392115660584e-10	1.98506304854188e-08	1.44901792095133e-08	MYB/IL4R/IL23A/GATA3/NFKBID/IFNG/IL7R/CD27/RASGRP1/SMARCC1/PRKDC/RARA/XBP1/SART1/LILRB2/LEF1/BTN2A2/SASH3/ACTL6A/SMARCA4/TGFBR2/ZAP70/IL15/ADAM8/LILRB4/PHF10/SMARCE1/STAT5B/CR1/RUNX3/BCL6/SOX4/IL18/PBRM1/CD83/SOCS5/XRCC6/CBFB/ITPKB/SMARCA2/SMARCD3/EGR3/BRD7/ARID1B/ADA/SMARCB1/ZBTB7B/FOXO3/NFKBIZ/PCID2/NLRP3/PTPRC/PIK3R6/IL10/ZBTB16/VNN1/IL2RG/MALT1/IL12RB1/ARID2/CD86/RHOH/SYK/HLX/LGALS9/DUSP10/TO…	68
BP	GO:0030593	neutrophil chemotaxis	58/5019	106/18903	7.15822086699902e-10	3.97997080205146e-08	2.90522208917837e-08	CCR7/C1QBP/IL23A/XCL2/CXCR1/XCL1/C5AR2/VAV1/PPIA/CXCR2/PIK3CD/CXCL5/ITGB2/PF4/RAC2/EDN1/DPP4/PF4V1/NOD2/C5AR1/CCL20/DNM1L/S100A12/DAPK2/PPBP/PIKFYVE/CCL4/CXCL1/FCER1G/ITGA1/TNFAIP6/IL1B/CCL5/TREM1/PREX1/BST1/MCU/S100A8/CCL4L1/LGALS3/S100A9/CSF3R/ITGA9/PPIB/CCL3/MOSPD2/CKLF/CCL3L3/SYK/MPP1/PIK3CG/CXCL9/JAM3/PDE4B/CXCL2/CCL23/VAV3/CCL1	58
BP	GO:0031663	lipopolysaccharide-mediated signaling pathway	40/5019	63/18903	8.3078746249516e-10	4.57935778896039e-08	3.34275100608307e-08	CD6/MYD88/IRAK2/TNF/MAPK3/LY96/CD55/SPI1/LILRA2/CD14/CARD16/BCL10/HCK/MIF/IL18/AKT1/SASH1/LYN/LTF/SCARB1/MAPK14/MAPK1/IL1B/CCL5/SCIMP/NFKBIA/PTAFR/TNFAIP3/PLCG2/TRIB1/CCL3/TLR4/BPI/MALT1/PRKCA/TGFB1/CD36/TLR2/MTDH/PTPN22	40
BP	GO:0045582	positive regulation of T cell differentiation	62/5019	117/18903	1.05976385502047e-09	5.79156417863322e-08	4.22761397495344e-08	MYB/IL4R/IL23A/GATA3/NFKBID/IFNG/IL7R/CD27/RASGRP1/SMARCC1/RARA/XBP1/SART1/LILRB2/LEF1/BTN2A2/SASH3/ACTL6A/SMARCA4/TGFBR2/ZAP70/ADAM8/LILRB4/PHF10/SMARCE1/STAT5B/CR1/RUNX3/BCL6/SOX4/IL18/PBRM1/CD83/SOCS5/CBFB/ITPKB/SMARCA2/SMARCD3/EGR3/BRD7/ARID1B/ADA/SMARCB1/ZBTB7B/FOXO3/NFKBIZ/NLRP3/PTPRC/PIK3R6/ZBTB16/VNN1/IL2RG/MALT1/IL12RB1/ARID2/CD86/RHOH/SYK/HLX/LGALS9/DUSP10/ZMIZ1	62
BP	GO:0050729	positive regulation of inflammatory response	76/5019	154/18903	1.14671412068423e-09	6.21363566750422e-08	4.53570955496332e-08	CCR7/MAPK13/IL23A/CD28/FFAR2/TNIP1/ZBP1/IFNG/RPS19/GPSM3/IL6/TLR10/LILRA5/VAMP8/TNF/ETS1/NLRC4/NINJ1/NLRP12/NLRP1/IL15/IL16/ADAM8/STAT5B/LDLR/S100A12/LRRK2/DHX9/IL18/PLA2G7/MIR128-1/MMP8/GRN/SUCNR1/ALOX5AP/MIR181B1/MGST2/IL1B/NFKBIZ/SNX4/OSM/MIR142/IL6ST/HLA-E/CAMK2N1/ABCC1/S100A8/IFI35/CASP1/NFKBIA/AIM2/NAIP/NLRP3/CDK19/CCR2/S100A9/IL17RA/NKG7/PLCG2/TLR7/CCL3/PTGS2/TLR4/TNFRSF1A/FCGR1A/CEBPA/PIK…	76
BP	GO:0032640	tumor necrosis factor production	87/5019	184/18903	1.16803994480559e-09	6.22370617257245e-08	4.54306062742806e-08	LILRA4/IL23A/MYD88/IFNG/GPR18/C5AR2/IL6/IL1A/RASGRP1/SLAMF1/RARA/LILRA5/CD2/HDAC2/LILRB1/ZC3H12A/PTPN11/BCL3/CLEC4A/SASH3/LY96/FCGR3A/TLR1/PF4/SIRPA/GSTP1/NOD2/LILRA2/LILRB4/CD14/ZFP36/LRRK2/MIF/DHX9/SPN/CLU/ARRB2/MMP8/CLEC7A/TSPO/LTF/ORM1/CX3CR1/HMGB1/PTPRJ/TYROBP/ANGPT1/ORM2/OAS1/HLA-E/MAVS/NOD1/PTPRC/CCR2/CYBB/PTAFR/HSPB1/TNFAIP3/IL10/C1QTNF4/PLCG2/STAT3/TMEM106A/CD34/CCL3/TLR4/BPI/PSEN1/OAS3/…	87
BP	GO:0032680	regulation of tumor necrosis factor production	87/5019	184/18903	1.16803994480559e-09	6.22370617257245e-08	4.54306062742806e-08	LILRA4/IL23A/MYD88/IFNG/GPR18/C5AR2/IL6/IL1A/RASGRP1/SLAMF1/RARA/LILRA5/CD2/HDAC2/LILRB1/ZC3H12A/PTPN11/BCL3/CLEC4A/SASH3/LY96/FCGR3A/TLR1/PF4/SIRPA/GSTP1/NOD2/LILRA2/LILRB4/CD14/ZFP36/LRRK2/MIF/DHX9/SPN/CLU/ARRB2/MMP8/CLEC7A/TSPO/LTF/ORM1/CX3CR1/HMGB1/PTPRJ/TYROBP/ANGPT1/ORM2/OAS1/HLA-E/MAVS/NOD1/PTPRC/CCR2/CYBB/PTAFR/HSPB1/TNFAIP3/IL10/C1QTNF4/PLCG2/STAT3/TMEM106A/CD34/CCL3/TLR4/BPI/PSEN1/OAS3/…	87
BP	GO:0002367	cytokine production involved in immune response	63/5019	120/18903	1.28131342859697e-09	6.7708413739248e-08	4.94244779678029e-08	DDX1/GATA3/MYD88/FFAR2/KIR2DL4/XCL1/KIT/IL6/HFE/SLAMF1/CD160/LITAF/LILRB1/TNFRSF14/TNF/HMOX1/TBX21/SMAD7/SASH3/CD55/TNFRSF1B/NOD2/LILRB4/CD226/BCL10/RABGEF1/BCL6/MIF/IL18/DENND1B/CLEC7A/IL18R1/ARG1/IL1B/ANGPT1/TREM1/SCIMP/IL1R1/HLA-E/HLA-F/MAVS/NOD1/NLRP3/JAK3/CCR2/HLA-A/IL10/HK1/PLCG2/LAPTM5/TLR7/TLR4/MALT1/F2RL1/TRIM6/ARID5A/TGFB1/SYK/CD36/SEMA7A/P2RX7/NR4A3/EPX	63
BP	GO:0032946	positive regulation of mononuclear cell proliferation	74/5019	149/18903	1.31559276555811e-09	6.89500011719554e-08	5.03307879420592e-08	CD6/IL23A/FCRL3/CD28/TNFRSF13C/MYD88/CD40/CD40LG/CD3E/XCL1/IL6/IL1A/CD274/ZNF335/SLAMF1/HES1/RPS3/BMI1/LILRB2/CARD11/SASH3/FCGR3A/CD55/SLC39A10/TGFBR2/ZAP70/IL15/ST6GAL1/STAT5B/BCL6/MIF/IL18/DHPS/GPAM/PDCD1LG2/CD38/TYK2/ADA/HMGB1/IL1B/CCL5/NCK2/IL6ST/BST1/HLA-E/SLC7A1/JAK3/PTPRC/CCR2/HLA-A/CD1D/ATAD5/TLR4/CD24/IL12RB1/PELI1/HAVCR2/CD86/CORO1A/BCL2L1/CDKN1A/SYK/TFRC/IGFBP2/GPR183/IL27RA/LGALS9/CSF…	74
BP	GO:0034655	nucleobase-containing compound catabolic process	170/5019	428/18903	1.38396718787804e-09	7.19239721713597e-08	5.25016697574715e-08	DEDD2/EIF3E/NPM1/ZFP36L1/FASTKD1/LRPPRC/PAIP1/GTPBP1/MYD88/UPP1/AXIN2/SMPDL3A/SLC11A1/SYNCRIP/APEX1/RNASEH2B/IL6/POLR2D/GSK3A/MTPAP/SERBP1/MIAT/FASTKD2/EXOSC2/SUCLA2/NEIL1/ZC3H12A/PATL1/DKC1/FXR1/DIS3/SETMAR/RNASEH2A/HINT1/TTC5/CDA/PDE5A/NCBP2/SND1/DCTPP1/PNPT1/PARN/EXOSC8/MRTO4/IGF2BP2/NCBP1/SSB/UNG/PATL2/ZC3H14/ISG20/YTHDF2/DFFA/TNRC6C/CNOT7/HNRNPAB/DHX34/TNFRSF1B/ZC3H12D/ERN1/DIS3L/YBX1/MAGOHB…	170
BP	GO:0050864	regulation of B cell activation	94/5019	204/18903	1.39483461827473e-09	7.19239721713597e-08	5.25016697574715e-08	BLK/CD22/ZFP36L1/FCRL3/CD28/TNFRSF13C/CD40/IL6/SLC15A4/CD27/IKZF3/XBP1/MSH2/THOC1/BMI1/SLAMF8/CARD11/TBX21/ID2/SASH3/SLC39A10/NOD2/STAT5B/CR1/TP53BP1/CTLA4/BCL6/RIF1/MIF/AKIRIN2/THEMIS2/TBC1D10C/MLH1/EXOSC6/LYN/FCGR2B/CD38/CD19/ADA/NFAM1/IGHM/IGHV2-26/TYROBP/APLF/BST1/PCID2/PTPRC/TNFAIP3/IL10/CASP3/MNDA/CD300A/IGHV4-39/RC3H1/LAPTM5/ATAD5/STAT6/IL2RG/TLR4/SH3KBP1/ZFP36L2/PELI1/BANK1/ATM/TGFB1/CDKN…	94
BP	GO:0006401	RNA catabolic process	127/5019	299/18903	1.43281821891557e-09	7.32915175339694e-08	5.34999240646034e-08	DEDD2/EIF3E/NPM1/ZFP36L1/FASTKD1/LRPPRC/PAIP1/GTPBP1/MYD88/AXIN2/SLC11A1/SYNCRIP/APEX1/RNASEH2B/POLR2D/MTPAP/SERBP1/MIAT/FASTKD2/EXOSC2/ZC3H12A/PATL1/DKC1/FXR1/DIS3/RNASEH2A/TTC5/NCBP2/SND1/PNPT1/PARN/EXOSC8/MRTO4/IGF2BP2/NCBP1/SSB/PATL2/ZC3H14/ISG20/YTHDF2/TNRC6C/CNOT7/HNRNPAB/DHX34/TNFRSF1B/ZC3H12D/ERN1/DIS3L/YBX1/MAGOHB/HSPA1A/KHSRP/UPF1/EIF4A3/TOB1/HSPA1B/ZFP36/EXOSC5/PRKCD/LSM7/DHX9/BTG2/SID…	127
BP	GO:0002718	regulation of cytokine production involved in immune response	62/5019	118/18903	1.65715148809942e-09	8.40938620230768e-08	6.13852105115524e-08	DDX1/GATA3/MYD88/FFAR2/KIR2DL4/XCL1/KIT/IL6/HFE/SLAMF1/CD160/LITAF/LILRB1/TNFRSF14/TNF/HMOX1/TBX21/SMAD7/SASH3/CD55/TNFRSF1B/NOD2/LILRB4/CD226/BCL10/RABGEF1/BCL6/MIF/IL18/DENND1B/CLEC7A/IL18R1/ARG1/IL1B/ANGPT1/SCIMP/IL1R1/HLA-E/HLA-F/MAVS/NOD1/NLRP3/JAK3/CCR2/HLA-A/IL10/HK1/PLCG2/LAPTM5/TLR7/TLR4/MALT1/F2RL1/TRIM6/ARID5A/TGFB1/SYK/CD36/SEMA7A/P2RX7/NR4A3/EPX	62
BP	GO:0030490	maturation of SSU-rRNA	36/5019	55/18903	1.69812133951037e-09	8.5494392478971e-08	6.24075426389473e-08	RPS19/NOB1/TSR1/SRFBP1/WDR43/DCAF13/NOL11/HEATR1/RPS21/NOP14/RPS8/RPP40/WDR3/BMS1/NAT10/UTP6/MRPS11/UTP3/IMP4/IMP3/MPHOSPH10/NOL10/DDX52/UTP20/NGDN/DHX37/KRI1/RPS16/BYSL/RIOK1/RIOK3/RIOK2/RCL1/RPS14/RRS1/RPS28	36
BP	GO:0042273	ribosomal large subunit biogenesis	45/5019	76/18903	1.97313342437903e-09	9.85641805896835e-08	7.19479737146102e-08	RPL7/NPM1/RPL35/RPL26/RPLP0/BRIX1/RPL11/RPL24/RPL10A/RPL7L1/WDR12/FASTKD2/RPL6/RSL1D1/ZNHIT6/NHP2/MRPL1/MAK16/TMA16/MRTO4/GTPBP4/RPF2/RPL14/GTF3A/NOP16/PAK1IP1/RPL38/MDN1/EBNA1BP2/NSA2/URB1/SPATA5/RRP15/NVL/RSL24D1/SDAD1/LAS1L/RPL35A/DDX18/RPF1/NOL9/NLE1/NIP7/SPATA5L1/RRS1	45
BP	GO:0044270	cellular nitrogen compound catabolic process	184/5019	474/18903	2.45366188833874e-09	1.21617938868511e-07	8.87763101827333e-08	DEDD2/EIF3E/NPM1/ZFP36L1/FASTKD1/LRPPRC/PAIP1/GTPBP1/MYD88/UPP1/AXIN2/SMPDL3A/SLC11A1/SYNCRIP/POR/APEX1/RNASEH2B/IL6/POLR2D/GSK3A/MTPAP/SERBP1/MIAT/FASTKD2/EXOSC2/SUCLA2/NEIL1/ZC3H12A/PATL1/DKC1/FXR1/DIS3/SETMAR/RNASEH2A/HINT1/TTC5/CDA/PDE5A/NCBP2/SND1/DCTPP1/HMOX1/PNPT1/PARN/EXOSC8/MRTO4/IGF2BP2/NCBP1/SSB/UNG/PATL2/MTHFS/AASDHPPT/ZC3H14/ISG20/YTHDF2/DFFA/TNRC6C/CNOT7/HNRNPAB/DHX34/TNFRSF1B/ZC3H1…	184
BP	GO:0042267	natural killer cell mediated cytotoxicity	44/5019	74/18903	2.47542810198534e-09	1.21752979108417e-07	8.88748842445586e-08	NCR3/SLAMF7/KIR3DL1/KIR2DL4/RASGRP1/VAV1/NCR1/CD2/CD160/LILRB1/CRTAM/KLRD1/KLRC1/SERPINB9/KLRB1/FCGR3A/CEACAM1/RNF19B/KLRC4/CD226/STAT5B/KLRC2/TUBB/GZMB/IL18/SLAMF6/KLRC3/ARRB2/AP1G1/HLA-E/HLA-F/PIK3R6/HLA-A/NKG7/HLA-B/PLEKHM2/PRDX1/HAVCR2/CORO1A/CLEC12B/ARL8B/UNC13D/LGALS9/PTPN6	44
BP	GO:0046700	heterocycle catabolic process	182/5019	468/18903	2.54649565344383e-09	1.242923145658e-07	9.07284992155076e-08	DEDD2/EIF3E/NPM1/ZFP36L1/FASTKD1/LRPPRC/PAIP1/GTPBP1/MYD88/UPP1/AXIN2/SMPDL3A/SLC11A1/SYNCRIP/APEX1/RNASEH2B/IL6/POLR2D/GSK3A/MTPAP/SERBP1/MIAT/FASTKD2/EXOSC2/SUCLA2/NEIL1/ZC3H12A/PATL1/DKC1/FXR1/DIS3/SETMAR/RNASEH2A/HINT1/TTC5/CDA/PDE5A/NCBP2/SND1/DCTPP1/HMOX1/PNPT1/PARN/EXOSC8/MRTO4/IGF2BP2/NCBP1/SSB/UNG/PATL2/MTHFS/AASDHPPT/ZC3H14/ISG20/YTHDF2/DFFA/TNRC6C/CNOT7/HNRNPAB/DHX34/TNFRSF1B/ZC3H12D/E…	182
BP	GO:0002720	positive regulation of cytokine production involved in immune response	46/5019	79/18903	2.79335934107275e-09	1.34291275389618e-07	9.8027347196807e-08	DDX1/GATA3/MYD88/FFAR2/KIR2DL4/XCL1/KIT/IL6/SLAMF1/CD160/LILRB1/TNFRSF14/TBX21/SASH3/CD55/NOD2/CD226/BCL10/MIF/IL18/DENND1B/CLEC7A/IL18R1/IL1B/SCIMP/IL1R1/HLA-E/HLA-F/MAVS/NOD1/NLRP3/HLA-A/HK1/PLCG2/LAPTM5/TLR7/TLR4/MALT1/F2RL1/TRIM6/ARID5A/SYK/CD36/SEMA7A/P2RX7/NR4A3	46
BP	GO:2000514	regulation of CD4-positive, alpha-beta T cell activation	46/5019	79/18903	2.79335934107275e-09	1.34291275389618e-07	9.8027347196807e-08	MYB/IL4R/IL23A/CD28/GATA3/NFKBID/IFNG/CD3E/XCL1/CD274/RARA/CD160/JUNB/ZC3H12A/CARD11/IRF4/TBX21/SMAD7/SASH3/CD55/TGFBR2/TWSG1/RUNX3/BCL6/IL18/CD83/SOCS5/CBFB/BATF/ZBTB7B/HMGB1/NFKBIZ/NLRP3/JAK3/LGALS9C/SH3RF1/RC3H1/LGALS9B/IL2RG/MALT1/IL12RB1/CD86/CBLB/TARM1/HLX/LGALS9	46
BP	GO:0071621	granulocyte chemotaxis	66/5019	130/18903	3.20784037681382e-09	1.53066652010056e-07	1.11732633391928e-07	CCR7/C1QBP/IL23A/XCL2/CXCR1/XCL1/C5AR2/VAV1/SLAMF1/PPIA/CXCR2/MAPK3/PIK3CD/CMKLR1/CXCL5/ITGB2/PF4/RAC2/EDN1/DPP4/PF4V1/NOD2/C5AR1/CCL20/DNM1L/S100A12/DAPK2/PPBP/PIKFYVE/CCL4/CXCL1/FCER1G/ITGA1/TNFAIP6/MAPK1/IL1B/CCL5/TREM1/PREX1/BST1/MCU/S100A8/CCL4L1/LGALS3/S100A9/IL17RA/CSF3R/ITGA9/PPIB/CCL3/MOSPD2/CKLF/CSF1R/CCL3L3/SYK/THBS1/MPP1/PIK3CG/CXCL9/JAM3/PDE4B/CXCL2/CSF1/CCL23/VAV3/CCL1	66
BP	GO:0031295	T cell costimulation	31/5019	45/18903	3.51026225716887e-09	1.65902449810462e-07	1.21102260747672e-07	CCR7/TNFSF14/CD5/LCK/CD28/TNFRSF13C/CD40LG/CD3E/CD274/VAV1/CD160/PTPN11/ICOS/TNFRSF14/LILRB2/CARD11/DPP4/LILRB4/AKT1/LYN/FYN/PDCD1LG2/CSK/CD24/CD86/YES1/PTPN6/TNFSF13B/TMIGD2/CAV1/MAP3K8	31
BP	GO:0002228	natural killer cell mediated immunity	45/5019	77/18903	3.52873524776709e-09	1.65902449810462e-07	1.21102260747672e-07	NCR3/SLAMF7/KIR3DL1/KIR2DL4/SH2D1B/RASGRP1/VAV1/NCR1/CD2/CD160/LILRB1/CRTAM/KLRD1/KLRC1/SERPINB9/KLRB1/FCGR3A/CEACAM1/RNF19B/KLRC4/CD226/STAT5B/KLRC2/TUBB/GZMB/IL18/SLAMF6/KLRC3/ARRB2/AP1G1/HLA-E/HLA-F/PIK3R6/HLA-A/NKG7/HLA-B/PLEKHM2/PRDX1/HAVCR2/CORO1A/CLEC12B/ARL8B/UNC13D/LGALS9/PTPN6	45
BP	GO:0002821	positive regulation of adaptive immune response	62/5019	120/18903	3.94240585225903e-09	1.8399812422879e-07	1.34311391078882e-07	IL23A/CD28/GATA3/NFKBID/CD40/SLC11A1/EIF2AK4/XCL1/IL6/CD274/SLAMF1/MSH2/CLEC6A/TNF/SKAP1/TBX21/SASH3/CD55/NOD2/CD226/TP53BP1/RIF1/IL18/AKIRIN2/DENND1B/CLEC7A/MLH1/IL18R1/FCER2/EXOSC6/TYK2/ADA/CD4/IL1B/NFKBIZ/MR1/TAP2/IL6ST/IL1R1/HLA-E/HLA-F/NLRP3/PTPRC/CCR2/HLA-A/HLA-B/CD1D/ATAD5/STAT6/MALT1/IL12RB1/FCGR1A/ARID5A/HLA-H/TGFB1/TFRC/STX7/IL27RA/P2RX7/CD1C/TNFSF13B/TNFSF13	62
BP	GO:0140053	mitochondrial gene expression	78/5019	163/18903	4.20776366869205e-09	1.94959716649398e-07	1.42312922250042e-07	C1QBP/FASTKD1/LRPPRC/MRPL45/MRPS30/MRPL3/TRMT61B/TFB2M/MRPS35/FASTKD2/MRPL9/MRPL19/GFM1/MRPL46/MRPS22/MRPS27/MRPL1/METTL8/MRPS21/YARS2/PNPT1/MRPL39/MRPL15/MRPL22/MRPS31/TRUB2/MRPL42/MRPL27/MRPS11/MRPS17/TFAM/MRPS34/MRPS7/TUFM/NOA1/MRPS18B/PTCD3/MRPL32/MRPS14/GFM2/MRPL48/EARS2/MTIF2/TRNT1/MRPL13/MRPS16/IARS2/MRPS9/RMND1/MRPL16/MRPS25/MRPS23/TRIT1/MRPL47/MRPL17/WARS2/QRSL1/TFB1M/MRPS10/TRMT10C/MRPL…	78
BP	GO:0072594	establishment of protein localization to organelle	175/5019	449/18903	4.24335694461582e-09	1.95194419452328e-07	1.42484246061542e-07	ZFAND2A/WBP2/IPO7/BAG3/CCT2/IPO5/IFNG/HSPA1L/MFN2/RAN/CCT6A/CCT4/CCT8/VPS36/GSK3A/CCT7/CCT3/APPL1/TIMM23/TOMM20/GNPTAB/MTX2/ZC3H12A/DKC1/TIMM50/SRP72/VPS37C/LMAN1/SGTB/MTX1/NUP133/POT1/BCL3/IL10RA/NUP107/RAB8B/SRPRB/CSE1L/TIMM13/HUWE1/TIMM9/SAMM50/TOMM40L/RAC2/TOMM5/TOMM40/CSNK2A2/UBAP1/SRP68/SRP9/BCS1L/HCLS1/HSPA4/VPS37A/PEX3/PDCD5/CHMP4B/AIFM1/PRKCD/PMPCA/NUTF2/IMMP2L/HSP90AB1/LRRK2/GZMB/CLU/EL…	175
BP	GO:0051250	negative regulation of lymphocyte activation	79/5019	166/18903	4.60183348332289e-09	2.10172309231189e-07	1.53417516278599e-07	BLK/ADORA2A/IL4R/SOCS6/XCL1/HFE/CD274/GLMN/LILRB1/RASSF5/CRTAM/ZC3H12A/THOC1/PIBF1/FGR/TNFRSF14/PDE5A/LILRB2/TBX21/SMAD7/BTN2A2/ID2/IRF1/CEACAM1/TWSG1/LILRB4/CR1/CTLA4/RUNX3/BCL6/SPN/PGLYRP1/ZC3H8/SOCS5/CBFB/TBC1D10C/PAG1/LYN/PDCD1LG2/FCGR2B/ARG1/ZBTB7B/HMGB1/TYROBP/HLA-F/DLG1/PRKAR1A/LST1/LGALS3/JAK3/TNFAIP3/LGALS9C/IL10/CASP3/MNDA/CD300A/RC3H1/LAPTM5/LGALS9B/PELI1/HAVCR2/CD86/BANK1/ATM/FGL2/CBL…	79
BP	GO:0002704	negative regulation of leukocyte mediated immunity	41/5019	68/18903	4.83333810918432e-09	2.1917988560372e-07	1.59992692617568e-07	CR2/KIR2DL4/XCL1/IL7R/HFE/SLAMF1/LILRB1/KLRD1/THOC1/HMOX1/TBX21/SMAD7/KLRC1/CR1L/SERPINB9/CEACAM1/CD55/SPI1/NOD2/LILRB4/CR1/RABGEF1/BCL6/ARRB2/FCGR2B/CX3CR1/ARG1/HLA-E/HLA-F/BCR/JAK3/PTPRC/CCR2/HLA-A/CD300A/HLA-B/HAVCR2/CLEC12B/LGALS9/PTPN6/DUSP22	41
BP	GO:0002431	Fc receptor mediated stimulatory signaling pathway	25/5019	33/18903	5.10233964566563e-09	2.28142375485217e-07	1.66534957592061e-07	BLK/VAV1/APPL1/PLD2/FGR/ABL1/CD226/PRKCD/RABGEF1/HCK/LYN/FYN/FCGR2B/CSK/FCER1G/PTPRJ/PLSCR1/PTPRC/PAK1/SYK/MYO1G/YES1/CD47/NR4A3/VAV3	25
BP	GO:0038094	Fc-gamma receptor signaling pathway	25/5019	33/18903	5.10233964566563e-09	2.28142375485217e-07	1.66534957592061e-07	LCK/VAV1/APPL1/CD247/PLD2/FGR/FCGR3A/CLEC4E/CLEC4D/ABL1/PRKCD/HCK/LYN/FYN/FCGR2B/FCER1G/PTPRJ/PTPRC/FCGR1A/PAK1/SYK/MYO1G/YES1/CD47/VAV3	25
BP	GO:0031331	positive regulation of cellular catabolic process	168/5019	429/18903	5.8030121198527e-09	2.5766985759957e-07	1.88088857744348e-07	DNAJB2/ZFAND2A/ZFP36L1/BAG3/PAIP1/GTPBP1/AXIN2/IFNG/WDR45/SYNCRIP/SUMO2/SESN2/IL6/POLR2D/GSK3A/CPT1A/MIAT/PIP4K2C/EXOSC2/ZC3H12A/PATL1/DIS3/SNX18/TTC5/TNF/WIPI1/MAPK3/ABCD2/HMOX1/PNPT1/PARN/EXOSC8/MEFV/KEAP1/SMAD7/PATL2/PLK3/FBXO22/TFEB/YTHDF2/SLC25A5/TNRC6C/CNOT7/TOM1/BCL2L11/TNFRSF1B/HECTD1/ZC3H12D/RNF19B/YBX1/ADAM8/HSPA1A/KHSRP/UPF1/NOD2/GPSM1/TOB1/HSPA1B/PIP4K2B/FOXO1/ZFP36/EXOSC5/VDAC1/MLST8…	168
BP	GO:0031343	positive regulation of cell killing	40/5019	66/18903	6.01492629627634e-09	2.65237508540627e-07	1.93612945173788e-07	IL23A/NCR3/IFNG/XCL1/RASGRP1/VAV1/CD160/CRTAM/KLRD1/SPI1/KLRC4/CD226/STAT5B/KLRC2/SLAMF6/KLRC3/ITGAM/CLEC7A/FCER2/PRF1/ARG1/MAPK8/TYROBP/MR1/AP1G1/TAP2/HLA-E/HLA-F/PTPRC/HLA-A/HLA-B/CD1D/F2RL1/IL12RB1/HLA-H/SYK/STX7/P2RX7/CD1C/STAP1	40
BP	GO:0050727	regulation of inflammatory response	163/5019	414/18903	6.2671831192879e-09	2.74468279895389e-07	2.00351045067935e-07	CCR7/MAPK13/ADORA2A/PPARD/IL23A/CD28/GATA3/FPR2/MYD88/FFAR2/TNIP1/ZBP1/IFNG/RPS19/CYP19A1/GPSM3/XCL1/IL6/TLR10/LILRA5/DROSHA/VAMP8/SIGLEC10/MAPK7/CASP5/FGR/TNF/MMP9/ETS1/SLAMF8/RHBDF2/NR1D1/MEFV/NLRC4/RORA/NINJ1/NLRP12/NLRP1/ALOX5/ZYX/PSMA1/TMSB4X/SIRPA/TNFRSF1B/IL15/IL16/GSTP1/SOCS3/ADAM8/GPX4/NOD2/AREL1/AKNA/SBNO2/C1QTNF3/BIRC3/ZFP36/STAT5B/LDLR/PRKCD/S100A12/RABGEF1/PSMA6/LRRK2/BCL6/HCK/DHX9/I…	163
BP	GO:0043367	CD4-positive, alpha-beta T cell differentiation	49/5019	88/18903	6.77472817976234e-09	2.94677632526534e-07	2.15103077329511e-07	MYB/IL4R/IL23A/GATA3/NFKBID/IFNG/IL6/SEMA4A/RARA/JUNB/ZC3H12A/LY9/BCL3/LEF1/IRF4/TBX21/RORA/SMAD7/SASH3/RUNX3/BCL6/IL18/SPN/SLAMF6/CD83/SOCS5/CBFB/IL18R1/BATF/ZBTB7B/HMGB1/NFKBIZ/NLRP3/JAK3/STAT3/ARMC5/SH3RF1/RC3H1/STAT6/IL2RG/MALT1/IL12RB1/CD86/FUT7/NKX2-3/GPR183/HLX/LGALS9/TOX	49
BP	GO:0032069	regulation of nuclease activity	19/5019	22/18903	7.19685016431992e-09	3.1092337804501e-07	2.26961832351312e-07	NPM1/ABCE1/OASL/NEIL1/RPS3/DFFA/HSPA1A/PRKCD/GZMA/AKT1/HMGB1/TERF2/OAS1/TERF1/TMBIM6/DDX11/OAS3/PCNA/OAS2	19
BP	GO:0050671	positive regulation of lymphocyte proliferation	71/5019	146/18903	8.80002413460346e-09	3.77633250447346e-07	2.75657414431874e-07	CD6/IL23A/FCRL3/CD28/TNFRSF13C/MYD88/CD40/CD40LG/CD3E/XCL1/IL6/IL1A/CD274/ZNF335/SLAMF1/HES1/RPS3/BMI1/LILRB2/CARD11/SASH3/FCGR3A/CD55/SLC39A10/TGFBR2/ZAP70/IL15/STAT5B/BCL6/MIF/IL18/DHPS/GPAM/PDCD1LG2/CD38/TYK2/ADA/HMGB1/IL1B/CCL5/NCK2/IL6ST/BST1/HLA-E/SLC7A1/JAK3/PTPRC/CCR2/HLA-A/CD1D/ATAD5/TLR4/CD24/IL12RB1/PELI1/HAVCR2/CD86/CORO1A/CDKN1A/SYK/TFRC/IGFBP2/GPR183/IL27RA/LGALS9/TNFSF13B/TMIGD2/IR…	71
BP	GO:0006260	DNA replication	120/5019	286/18903	9.52589993943867e-09	4.06057361418472e-07	2.96405897062955e-07	ID3/SET/PDS5A/NAP1L1/SIRT7/RAD17/RBBP4/STOML2/NUCKS1/CDK2AP1/THOC1/S100A11/SETMAR/RNASEH2A/SSRP1/BLM/ZRANB3/FAF1/RFC3/PRIM2/TSPYL2/GTPBP4/FANCM/POLA1/SSBP1/WRNIP1/WDR18/ACTL6A/TFPT/RBBP7/POLG2/CTC1/MEAF6/POLE3/ETAA1/UPF1/UCHL5/SUPT16H/REV1/REV3L/WRN/RUVBL1/ANKRD17/PARP1/MCM3/BCL6/DHX9/LIG3/POLD2/MCM4/PRIM1/ACTR5/POLD4/RAD50/DUT/POLI/RPAIN/MCM6/NOC3L/NASP/WDHD1/DSCC1/SRPK2/TOP1MT/ATR/USP37/CHEK1/G…	120
BP	GO:0002702	positive regulation of production of molecular mediator of immune response	66/5019	133/18903	1.04869513365592e-08	4.44063356595759e-07	3.24148778154782e-07	IL4R/DDX1/CD28/GATA3/MYD88/FFAR2/CD40/KIR2DL4/XCL1/KIT/IL6/SLAMF1/XBP1/CD160/LILRB1/MSH2/TNFRSF14/TBX21/SASH3/CD55/NOD2/CD226/TP53BP1/BCL10/RIF1/MIF/IL18/DENND1B/CLEC7A/MLH1/IL18R1/EXOSC6/PHB2/IL1B/SCIMP/IL1R1/HLA-E/HLA-F/MAVS/NOD1/NLRP3/PTPRC/HLA-A/IL10/HK1/PLCG2/LAPTM5/ATAD5/TLR7/STAT6/TLR4/MALT1/F2RL1/TRIM6/CD86/ARID5A/TGFB1/SYK/TFRC/CD36/CD244/SEMA7A/P2RX7/NR4A3/PTPN22/TNFSF13	66
BP	GO:0019439	aromatic compound catabolic process	186/5019	489/18903	1.23369341047382e-08	5.1896287280063e-07	3.78822477980672e-07	DEDD2/EIF3E/NPM1/ZFP36L1/FASTKD1/LRPPRC/PAIP1/GTPBP1/MYD88/UPP1/AXIN2/SMPDL3A/SLC11A1/SYNCRIP/APEX1/RNASEH2B/IL6/POLR2D/GSK3A/MTPAP/SERBP1/MIAT/FASTKD2/EPHX2/EXOSC2/SUCLA2/QDPR/ACAA1/NEIL1/ZC3H12A/PATL1/DKC1/FXR1/DIS3/SETMAR/RNASEH2A/HINT1/TTC5/CDA/PDE5A/NCBP2/SND1/DCTPP1/HMOX1/PNPT1/PARN/EXOSC8/MRTO4/IGF2BP2/NCBP1/SSB/UNG/PATL2/FAH/MTHFS/AASDHPPT/ZC3H14/ISG20/YTHDF2/DFFA/TNRC6C/CNOT7/HNRNPAB/DHX…	186
BP	GO:0006909	phagocytosis	129/5019	314/18903	1.25779296727097e-08	5.25642368152324e-07	3.83698246775333e-07	SIRPG/ADORA2A/FPR2/IL2RB/MYD88/IFNG/SLC11A1/DNM2/CNN2/CALR/VAV1/APPL1/SLAMF1/RARA/PLD2/FGR/TNF/JMJD6/SIRPB1/ITGB2/RAC2/MARCO/SIRPA/IL15/NOD2/ITGB3/FCN1/ABL1/CD14/RHOG/DYSF/NCF2/CDC42SE1/LDLR/PRKCD/TMEM175/XKR8/TM9SF4/HCK/ITGAL/LETMD1/MYH9/ITGAM/CLEC7A/RAB20/ABCA7/PIKFYVE/CD93/ANXA3/PECAM1/LYN/FYN/SCARB1/FCGR2B/ANXA11/MIR181B1/CSK/FCER1G/CFP/HMGB1/LRP1/FCN2/IGHM/IGHV2-26/PTPRJ/TYROBP/CD300LF/IL1B/…	129
BP	GO:0071675	regulation of mononuclear cell migration	62/5019	123/18903	1.35545047350483e-08	5.62775995298046e-07	4.10804333528396e-07	CCR7/TNFSF14/C1QBP/FPR2/XCL2/PADI2/XCL1/CALR/SLAMF1/STK10/TNFRSF14/TNF/SLAMF8/MAPK3/CMKLR1/SPI1/ADAM8/CCR1/CREB3/C5AR1/ITGB3/ABL1/NEDD9/CCL20/DUSP1/PLCB1/SPN/PLA2G7/AKT1/PTK2B/SPNS2/CCL4/ITGA4/LYN/CX3CR1/HMGB1/OXSR1/MAPK1/CCR6/CCL5/MSN/RIPK3/LGALS3/CCR2/LRCH1/GCSAML/LGMN/CCL3/MOSPD2/WNK1/CSF1R/CORO1A/THBS1/APP/CD47/DOCK8/IL27RA/CD200/LGALS9/CSF1/CD200R1/CCL1	62
BP	GO:0002286	T cell activation involved in immune response	60/5019	118/18903	1.52210092068076e-08	6.27891179795665e-07	4.5833585618326e-07	MYB/IL4R/IL23A/GATA3/NFKBID/IFNG/SLC11A1/EOMES/EIF2AK4/IL6/SEMA4A/RPS6/RARA/JUNB/LILRB1/ZC3H12A/LY9/BCL3/LEF1/IRF4/TBX21/RORA/SMAD7/CEACAM1/CLEC4E/ICAM1/CLEC4D/APBB1IP/BCL6/IL18/SPN/ITGAL/SLAMF6/SOCS5/IL18R1/FCGR2B/BATF/FCER1G/ZBTB7B/HMGB1/NFKBIZ/LCP1/LGALS3/NLRP3/JAK3/STAT3/RC3H1/STAT6/MALT1/F2RL1/IL12RB1/PSEN1/HAVCR2/CD86/FGL2/GPR183/HLX/LGALS9/TP53/CD1C	60
BP	GO:0007249	I-kappaB kinase/NF-kappaB signaling	120/5019	288/18903	1.54099112544553e-08	6.31608798467869e-07	4.61049571540182e-07	TRAF1/CCR7/SHISA5/NFKBIB/DDX1/MYD88/TNIP1/CD40/TRIM39/SLC44A2/IL1A/WLS/MAP3K14/RBCK1/LITAF/ZC3H12A/ATP2C1/CLEC6A/IRAK2/TNF/BCL3/SECTM1/HMOX1/NR1D1/CARD11/RORA/NLRP12/ZMYND11/MAP3K3/DHX15/SIRPA/EDN1/ZNF675/GSTP1/TLR8/PPP5C/NOD2/CLEC4D/ABL1/LILRB4/TIFA/BIRC3/FASLG/S100A12/ANKRD17/FAIM/CARD16/BCL10/ERC1/IRAK1BP1/APOL3/USP10/PINK1/AKT1/CLEC7A/CANT1/RELA/PIM2/CFLAR/FYN/LTF/PPM1N/TRAF3/CX3CR1/S100A4/TR…	120
BP	GO:0001776	leukocyte homeostasis	53/5019	100/18903	1.67488541078771e-08	6.82115752648194e-07	4.97917660840277e-07	FLT3/TNFSF14/IL7R/IL6/SLC15A4/RPS6/SLC46A2/CXCR2/PIK3CD/SASH3/BCL2L11/MTHFD1/GCNT4/ABL1/LAT/STAT5B/BCL10/XKR8/MIF/ZC3H8/HCAR2/AKT1/SPNS2/SKIL/GPAM/ITPKB/LYN/ADA/TCIRG1/HMGB1/RIPK3/SLC39A3/JAK3/TNFAIP3/CASP3/HIF1A/TRAF3IP2/RC3H1/FAS/SH2B3/CORO1A/NKX2-3/JAM3/GPR183/NF1/LGALS9/PDE4B/P2RX7/SOS2/CSF1/TNFSF13B/LGALS2/GAPT	53
BP	GO:0032615	interleukin-12 production	38/5019	63/18903	1.73327854860018e-08	6.883591950155e-07	5.02475128113318e-07	LTB/CCR7/C1QBP/IL23A/CD40/CD40LG/IFNG/SLAMF1/LILRA5/LILRB1/PIBF1/MEFV/CMKLR1/IRF1/IL16/TLR8/NOD2/PLCB1/ARRB2/CLEC7A/RELA/HMGB1/MAPK14/SCIMP/JAK3/IL10/PLCG2/NFKB1/HLA-B/LAPTM5/TLR4/SYK/THBS1/CD47/CD36/TLR2/LGALS9/IRF8	38
BP	GO:0032623	interleukin-2 production	38/5019	63/18903	1.73327854860018e-08	6.883591950155e-07	5.02475128113318e-07	CD28/GATA3/CD3E/XCL1/IL1A/GLMN/STOML2/RPS3/CARD11/IRF4/TBX21/PRKD2/SASH3/NOD2/ABL1/LILRB4/ZFP36/STAT5B/CR1/CD83/CLEC7A/CD4/IL1B/GBP1/PTPRC/CCR2/EZR/TNFAIP3/PLCG2/CD34/LAPTM5/HOMER3/MALT1/HAVCR2/CD86/HOMER2/PDE4B/PRNP	38
BP	GO:0032655	regulation of interleukin-12 production	38/5019	63/18903	1.73327854860018e-08	6.883591950155e-07	5.02475128113318e-07	LTB/CCR7/C1QBP/IL23A/CD40/CD40LG/IFNG/SLAMF1/LILRA5/LILRB1/PIBF1/MEFV/CMKLR1/IRF1/IL16/TLR8/NOD2/PLCB1/ARRB2/CLEC7A/RELA/HMGB1/MAPK14/SCIMP/JAK3/IL10/PLCG2/NFKB1/HLA-B/LAPTM5/TLR4/SYK/THBS1/CD47/CD36/TLR2/LGALS9/IRF8	38
BP	GO:0032663	regulation of interleukin-2 production	38/5019	63/18903	1.73327854860018e-08	6.883591950155e-07	5.02475128113318e-07	CD28/GATA3/CD3E/XCL1/IL1A/GLMN/STOML2/RPS3/CARD11/IRF4/TBX21/PRKD2/SASH3/NOD2/ABL1/LILRB4/ZFP36/STAT5B/CR1/CD83/CLEC7A/CD4/IL1B/GBP1/PTPRC/CCR2/EZR/TNFAIP3/PLCG2/CD34/LAPTM5/HOMER3/MALT1/HAVCR2/CD86/HOMER2/PDE4B/PRNP	38
BP	GO:0031294	lymphocyte costimulation	31/5019	47/18903	1.75602201474054e-08	6.930867137192e-07	5.05926030757607e-07	CCR7/TNFSF14/CD5/LCK/CD28/TNFRSF13C/CD40LG/CD3E/CD274/VAV1/CD160/PTPN11/ICOS/TNFRSF14/LILRB2/CARD11/DPP4/LILRB4/AKT1/LYN/FYN/PDCD1LG2/CSK/CD24/CD86/YES1/PTPN6/TNFSF13B/TMIGD2/CAV1/MAP3K8	31
BP	GO:0030099	myeloid cell differentiation	159/5019	407/18903	1.78774683691394e-08	7.0127934203851e-07	5.11906327082751e-07	CCR7/MYB/IL23A/ZFP36L1/CDK6/GATA3/IFNG/RPS19/KIT/GPR137B/WDR1/LILRB3/RPS6/CAMK4/PRKDC/RARA/JUNB/LILRB1/TGFBR3/PTPN11/TNF/MMP9/PRMT1/ETS1/JMJD6/UBA5/CD101/LEF1/GLO1/PIK3CD/IRF4/ID2/SLC25A5/CEACAM1/TGFBR2/G6PD/PF4/OSCAR/IL15/ZNF675/SPI1/HSPA1A/CCR1/PAF1/HCLS1/HSPA1B/SBNO2/SMAD5/LILRB4/ZNF385A/NEDD9/ZFP36/STAT5B/ACVR2A/NCOA6/PARP1/TMEM14C/BCL6/EVI2B/MAF/TFE3/GP5/MYH9/GPR171/CBFB/GP1BA/PTK2B/ITPKB/NB…	159
BP	GO:0006605	protein targeting	132/5019	325/18903	1.95885459565583e-08	7.63714407598987e-07	5.57481468365722e-07	ZFAND2A/BAG3/ZDHHC19/INPP5K/HSPA1L/MFN2/RPL11/GSK3A/TIMM23/TOMM20/GNPTAB/MTX2/YIF1B/TIMM50/SRP72/VPS37C/LMAN1/SGTB/ZDHHC18/ZDHHC21/MTX1/RAB8B/PRKCI/SRPRB/TIMM13/ITGB2/HUWE1/TIMM9/SAMM50/ZDHHC7/TOMM40L/RAC2/TOMM5/TOMM40/CSNK2A2/SRP68/SRP9/YWHAQ/GDI1/YWHAG/HSPA4/VPS37A/PEX3/PDCD5/CHMP4B/STXBP4/AIFM1/PMPCA/IMMP2L/RABGEF1/LRRK2/CLU/ANK3/HERPUD1/GABARAP/ITGAM/NUP54/PINK1/NACA/TOMM34/TSPO/PIKFYVE/AP3M1…	132
BP	GO:0050764	regulation of phagocytosis	54/5019	103/18903	2.02257511354872e-08	7.83778501577608e-07	5.72127467526318e-07	SIRPG/FPR2/IL2RB/IFNG/SLC11A1/DNM2/CNN2/CALR/APPL1/FGR/TNF/SIRPB1/SIRPA/IL15/NOD2/FCN1/DYSF/HCK/LETMD1/CLEC7A/ABCA7/SCARB1/FCGR2B/MIR181B1/CSK/FCER1G/CFP/HMGB1/FCN2/PTPRJ/CD300LF/IL1B/PLSCR1/RAB31/BCR/GATA2/PTPRC/PLCG2/CD300A/PTX3/MFGE8/IL2RG/F2RL1/FCGR1A/MIR20A/SYK/CD47/CYBA/CD36/TLR2/SOD1/ATG3/AZU1/STAP1	54
BP	GO:0071826	ribonucleoprotein complex subunit organization	104/5019	242/18903	2.05581030445214e-08	7.91858499196806e-07	5.78025547871959e-07	EIF3E/DDX1/RPLP0/EIF3M/CLNS1A/RPS19/BRIX1/EIF3D/EIF3J/RPL11/RPL24/POLR2D/FASTKD2/EIF3B/RPL6/PRKDC/SHQ1/TAF9/EIF2D/ZNHIT6/RPSA/SRSF10/SART1/RPS5/EIF3L/MRTO4/ZFAND1/EIF3CL/NCBP1/EIF3C/NUDT21/SNRPD1/RPF2/DENR/SF3A3/SRSF6/EIF4B/RPL38/SNRPD2/MRPS11/EIF3H/ERAL1/PRMT5/COIL/MDN1/MRPS7/RUVBL1/PRPF8/SF3B4/EIF3I/VCP/HSP90AB1/PRPF6/DHX9/SNRPE/SNRPF/RBMX/GEMIN8/LSM4/DDX20/EIF2S2/EIF2S3/HTATSF1/PTGES3/NAF1/SF3…	104
BP	GO:0072678	T cell migration	42/5019	73/18903	2.20498448707803e-08	8.4423178505251e-07	6.16255985862211e-07	TNFSF14/XCL2/CXCL16/XCL1/TNFRSF14/PIK3CD/S1PR1/ICAM1/ZAP70/GPR15/ADAM8/ITGB3/ABL1/CD99/CCL20/SPN/ITGAL/SPNS2/ITGA4/OXSR1/CCR6/CCL5/MSN/SLC12A2/RIPK3/CCR2/LRCH1/DEFA1B/CCL3/WNK1/CORO1A/FUT7/MYO1G/PIK3CG/APP/PLEC/GPR183/ITGB7/DOCK8/IL27RA/CD200/CD200R1	42
BP	GO:0002708	positive regulation of lymphocyte mediated immunity	60/5019	119/18903	2.27917175520775e-08	8.67441916833235e-07	6.33198468834032e-07	IL23A/NCR3/CD28/GATA3/CD40/KIR2DL4/SH2D1B/XCL1/IL6/RASGRP1/VAV1/SLAMF1/CD160/CRTAM/KLRD1/MSH2/TNF/TBX21/SASH3/CD55/NOD2/KLRC4/CD226/STAT5B/KLRC2/TP53BP1/RIF1/IL18/SLAMF6/KLRC3/DENND1B/MLH1/IL18R1/FCER2/EXOSC6/IL1B/MR1/AP1G1/TAP2/IL1R1/HLA-E/HLA-F/NLRP3/PTPRC/HLA-A/HLA-B/CD1D/ATAD5/STAT6/MALT1/IL12RB1/FCGR1A/ARID5A/HLA-H/TGFB1/TFRC/STX7/P2RX7/CD1C/TNFSF13	60
BP	GO:0002312	B cell activation involved in immune response	48/5019	88/18903	2.35242055490252e-08	8.90022309351878e-07	6.49681266922316e-07	CD28/CD40/CD40LG/IL6/SLC15A4/POU2AF1/XBP1/MSH2/THOC1/MSH6/BCL3/TBX21/PHF14/UNG/SPI1/ERCC1/ABL1/CR1/TP53BP1/LFNG/BCL6/RIF1/PTK2B/PLCL2/MLH1/EXOSC6/FCGR2B/BATF/CD19/ADA/CCR6/APLF/PTPRC/IL10/PLCG2/NOTCH2/ATAD5/STAT6/TLR4/ITM2A/TGFB1/TFRC/NKX2-3/GPR183/IL27RA/IRF8/TNFSF13/GAPT	48
BP	GO:0016236	macroautophagy	129/5019	317/18903	2.46900454425049e-08	9.28636179761038e-07	6.77867873015894e-07	ATP6V0C/BAG3/MFN2/WDR45/SESN2/CHMP7/VPS36/PIP4K2C/ATP6V0D1/VAMP8/SNX18/VPS37C/PLEKHM1/WIPI1/UBA5/MAPK3/HMOX1/UBXN2A/TBC1D5/CHMP2A/ATG9A/RAB19/PRKACA/SLC25A5/ATP6V0A2/SNX14/MTMR3/HUWE1/TOM1/MTMR14/TBC1D25/ERN1/NPC1/CHMP1A/ULK3/NOD2/QSOX1/GPSM1/VPS37A/CHMP4B/PIP4K2B/UFC1/VDAC1/VCP/LRRK2/CAPNS1/EI24/GABARAP/ATP6V0B/MAP1LC3B/PINK1/GABARAPL1/AKT1/SMCR8/PGAM5/PIKFYVE/ATG16L1/CHMP6/MAP1LC3B2/CHMP3/ATG2A…	129
BP	GO:0006968	cellular defense response	33/5019	52/18903	2.54757049840819e-08	9.51201608137371e-07	6.94339747869072e-07	ADORA2A/KIR3DL2/ITK/LSP1/KIR2DL4/NCR1/KIR2DS3/CXCR2/GNLY/LILRB2/LY96/CCR3/C5AR1/NCF2/KLRC2/BCL10/SPN/KLRC3/CD300C/PTK2B/RELA/PRF1/CCR5/CX3CR1/TCIRG1/NCF1/TYROBP/CCR6/KLRG1/CCR2/MNDA/CXCL9/TRAT1	33
BP	GO:0002824	positive regulation of adaptive immune response based on somatic recombination of immune receptors built from immunoglobulin superfamily domains	58/5019	114/18903	2.55875315295007e-08	9.51201608137371e-07	6.94339747869072e-07	IL23A/CD28/GATA3/NFKBID/CD40/SLC11A1/XCL1/IL6/CD274/SLAMF1/MSH2/CLEC6A/TNF/TBX21/SASH3/CD55/NOD2/CD226/TP53BP1/RIF1/IL18/DENND1B/CLEC7A/MLH1/IL18R1/FCER2/EXOSC6/TYK2/ADA/CD4/IL1B/NFKBIZ/MR1/TAP2/IL1R1/HLA-E/HLA-F/NLRP3/PTPRC/CCR2/HLA-A/HLA-B/CD1D/ATAD5/STAT6/MALT1/IL12RB1/FCGR1A/ARID5A/HLA-H/TGFB1/TFRC/STX7/IL27RA/P2RX7/CD1C/TNFSF13B/TNFSF13	58
BP	GO:0001732	formation of cytoplasmic translation initiation complex	15/5019	16/18903	2.72106191524854e-08	1.00569190093059e-06	7.34115517627746e-07	EIF3E/EIF3M/EIF3D/EIF3J/EIF3B/EIF3L/EIF3CL/EIF3C/EIF3H/EIF3I/EIF2S2/EIF3A/EIF3K/EIF3F/EIF3G	15
BP	GO:0032543	mitochondrial translation	64/5019	131/18903	3.7401726289665e-08	1.37440596492022e-06	1.00326227688067e-06	C1QBP/LRPPRC/MRPL45/MRPS30/MRPL3/MRPS35/FASTKD2/MRPL9/MRPL19/GFM1/MRPL46/MRPS22/MRPS27/MRPL1/METTL8/MRPS21/YARS2/MRPL39/MRPL15/MRPL22/MRPS31/TRUB2/MRPL42/MRPL27/MRPS11/MRPS17/MRPS34/MRPS7/TUFM/NOA1/MRPS18B/PTCD3/MRPL32/MRPS14/GFM2/MRPL48/EARS2/MTIF2/MRPL13/MRPS16/IARS2/MRPS9/RMND1/MRPL16/MRPS25/MRPS23/MRPL47/MRPL17/WARS2/QRSL1/MRPS10/TRMT10C/MRPL21/MRPL35/MRPS33/MRPL24/MRPL37/GATC/GADD45GIP1/DARS…	64
BP	GO:0002292	T cell differentiation involved in immune response	44/5019	79/18903	3.90349750218878e-08	1.42622645879972e-06	1.0410891984785e-06	MYB/IL4R/IL23A/GATA3/NFKBID/IFNG/EOMES/IL6/SEMA4A/RARA/JUNB/ZC3H12A/LY9/BCL3/LEF1/IRF4/TBX21/RORA/SMAD7/CLEC4E/CLEC4D/BCL6/IL18/SPN/SLAMF6/SOCS5/IL18R1/BATF/FCER1G/ZBTB7B/HMGB1/NFKBIZ/NLRP3/JAK3/STAT3/RC3H1/STAT6/MALT1/IL12RB1/CD86/FGL2/GPR183/HLX/LGALS9	44
BP	GO:0051168	nuclear export	76/5019	165/18903	5.16181919085429e-08	1.86775038477998e-06	1.36338429220066e-06	XPO1/NPM1/DUSP16/BAG3/ABCE1/RAN/SIRT7/XPO6/HNRNPA1/POLR2D/XPO4/CALR/THOC1/PTPN11/XPOT/NUP133/NCBP2/LTV1/CTDSPL2/NUP107/XPO5/FYTTD1/NXF1/NCBP1/SSB/CSE1L/PRKACA/NUP160/MAGOHB/THOC7/NMD3/UPF1/EIF4A3/MDN1/KHDRBS1/NUTF2/DHX9/RBM15B/NSUN2/PHAX/PKD1/CASC3/SDAD1/ATXN1/TCF7L2/NUP155/TXN/THOC2/IL1B/STRADA/EGR2/NUP188/ANP32B/CPSF6/UPF2/SP100/RIOK2/PCID2/AGFG1/LSG1/FRAT1/YWHAE/HHEX/RBM8A/AKAP13/CHP1/IWS1/RRS…	76
BP	GO:1904872	regulation of telomerase RNA localization to Cajal body	16/5019	18/18903	5.17034435574064e-08	1.86775038477998e-06	1.36338429220066e-06	CCT2/CCT6A/CCT4/CCT8/CCT7/CCT3/SHQ1/NHP2/DKC1/PARN/RUVBL1/CCT5/NAF1/EXOSC10/NOP10/RUVBL2	16
BP	GO:0019080	viral gene expression	52/5019	100/18903	5.24462319886672e-08	1.88393936705358e-06	1.37520161228711e-06	INPP5K/ST6GALNAC3/EIF2AK4/EIF3D/GSK3A/EIF3B/NUCKS1/EIF2D/PRMT1/EIF3L/LEF1/SSB/DENR/SMARCA4/ST3GAL3/ST6GAL1/ZFP36/TFAP4/ST6GALNAC2/DHX9/REST/PSMC3/MGAT4A/IFITM3/GALNT1/TARDBP/CANX/RRP1B/CCL4/USF1/ZNF639/SMARCB1/MON1B/CSDE1/EIF3A/TRIM21/ST3GAL2/CCL5/PARP9/HEXIM1/MGAT2/SPCS3/TRIM8/FUT8/CCL3/EIF3F/JUN/CCNT2/MID2/CCNT1/EIF3G/ST3GAL4	52
BP	GO:0022618	ribonucleoprotein complex assembly	100/5019	234/18903	5.34948251106196e-08	1.91087101540392e-06	1.39486065592759e-06	EIF3E/DDX1/RPLP0/EIF3M/CLNS1A/RPS19/BRIX1/EIF3D/EIF3J/RPL11/RPL24/POLR2D/FASTKD2/EIF3B/RPL6/PRKDC/SHQ1/TAF9/EIF2D/ZNHIT6/RPSA/SRSF10/SART1/RPS5/EIF3L/MRTO4/EIF3CL/NCBP1/EIF3C/NUDT21/SNRPD1/RPF2/DENR/SF3A3/SRSF6/EIF4B/RPL38/SNRPD2/MRPS11/EIF3H/ERAL1/PRMT5/COIL/MDN1/MRPS7/RUVBL1/PRPF8/SF3B4/EIF3I/HSP90AB1/PRPF6/DHX9/SNRPE/SNRPF/RBMX/GEMIN8/LSM4/DDX20/EIF2S2/EIF2S3/HTATSF1/PTGES3/NAF1/SF3B3/SNRPB2/N…	100
BP	GO:0051092	positive regulation of NF-kappaB transcription factor activity	72/5019	154/18903	5.43117898761289e-08	1.92927546926649e-06	1.40829518310383e-06	TRAF1/NPM1/MYD88/CD40/CD40LG/FLOT2/RBCK1/PPIA/IRAK2/RPS3/IL18RAP/TNF/CARD11/NLRC4/PRKD2/PRKCI/FLOT1/ADAM8/HSPA1A/NOD2/SLCO3A1/HSPA1B/S100A12/CARD16/BCL10/ERC1/PSMA6/DHX9/IL18/CLU/NTSR1/CLEC7A/RELA/IL18R1/CFLAR/LTF/CX3CR1/FER/TRIM21/IL1B/RIPK3/CAT/S100A8/PRKCH/DHX33/NOD1/AIM2/TRIM38/NLRP3/CAPN3/S100A9/TRIM25/PLCG2/TRIM8/STAT3/PRDX3/TLR6/TLR4/EDA2R/MALT1/TRIM6/PRKCB/IL1RAP/MID2/TFRC/APP/CD36/TLR2/M…	72
BP	GO:0033044	regulation of chromosome organization	106/5019	252/18903	5.82768482630524e-08	2.05868600991136e-06	1.50275978597484e-06	CCT2/AXIN2/GNL3/CCT6A/CCT4/CCT8/HNRNPA1/CCT7/CCT3/SMARCC1/ANAPC5/MAPKAPK5/DKC1/SETMAR/NAT10/POT1/MAPK3/PARN/CDC23/SSBP1/ANAPC7/ACTL6A/ANAPC1/TFPT/SMARCA4/CTC1/ERCC1/CDC16/UPF1/SETDB2/UCHL5/YLPM1/HDAC8/PPHLN1/PHF10/ZWILCH/SMARCE1/RUVBL1/TINF2/PARP1/ZW10/DUSP1/ACTR5/HNRNPC/PBRM1/NSMCE4A/RAD50/CCT5/HNRNPD/KNTC1/CENPV/NSMCE1/NAF1/SMARCA2/SMARCD3/SMC2/SFPQ/BRD7/ARID1B/SMARCB1/ATR/TERF2/EXOSC10/SMC5/PT…	106
BP	GO:0034504	protein localization to nucleus	124/5019	306/18903	6.07354232203466e-08	2.13374887951042e-06	1.55755272735117e-06	NUAK2/XPO1/IPO7/NPM1/BAG3/CCT2/IPO5/IFNG/RAN/CCT6A/SYNE1/CCT4/CCT8/SESN2/RPL11/CCT7/CALR/CCT3/APPL1/RASSF5/ZC3H12A/DKC1/ARL2/NUP133/NOL8/BCL3/LIMK2/NUP107/RPF2/LMNB2/CSE1L/POLR1A/NMD3/NF2/PAF1/HCLS1/WRN/LILRB4/PRKCD/NUTF2/PARP1/HSP90AB1/LRRK2/ELAVL1/NVL/AKIRIN2/NUP35/CCT5/NUP54/TARDBP/AKT1/RPAIN/RAP1GDS1/EIF2AK3/ABCA7/PIKFYVE/STK4/NUP155/FYN/NOLC1/TXN/TOR1B/PHB2/TXNIP/BYSL/MAPK14/ANGPT1/EFCAB7/RA…	124
BP	GO:0002688	regulation of leukocyte chemotaxis	62/5019	127/18903	6.28334088461984e-08	2.19539243804695e-06	1.60255009964937e-06	CCR7/TNFSF14/C1QBP/IL23A/FPR2/XCL2/GPR18/PADI2/CYP19A1/GPSM3/XCL1/C5AR2/IL6/CALR/SLAMF1/CXCR2/SLAMF8/MAPK3/CMKLR1/C5/RAC2/EDN1/SPI1/DPP4/CCR1/NOD2/CREB3/C5AR1/NEDD9/DNM1L/RIN3/DUSP1/DAPK2/MIF/PLA2G7/PTK2B/CCL4/LYN/CX3CR1/HMGB1/TNFAIP6/OXSR1/MAPK1/CCR6/CCL5/BST1/MCU/CCR2/VEGFA/LGMN/CCL3/MOSPD2/WNK1/F2RL1/CSF1R/THBS1/MPP1/JAM3/LGALS9/CSF1/STAP1/CCL1	62
BP	GO:0043300	regulation of leukocyte degranulation	31/5019	49/18903	7.49954096923901e-08	2.60609048681056e-06	1.90234351588134e-06	BLK/CD177/IL4R/STXBP2/VAMP8/FGR/HMOX1/ITGB2/CEACAM1/RAC2/SPI1/KLRC2/RABGEF1/ITGAM/LYN/FCGR2B/FER/C12orf4/AP1G1/SNX4/HLA-F/BCR/GATA2/CCR2/PTAFR/CD300A/F2RL1/SYK/UNC13D/PRAM1/LGALS9	31
BP	GO:0097193	intrinsic apoptotic signaling pathway	121/5019	298/18903	7.66121159001846e-08	2.64788037332854e-06	1.93284848877052e-06	SHISA5/LCK/RPL26/GRINA/KDM1A/RPL11/CYP1B1/CUL5/PRKDC/PPIA/XBP1/TAF9/MAPK7/MSH2/PTPMT1/PPP1R15A/HINT1/RPS3/URI1/TNF/MSH6/MMP9/BCL3/HMOX1/RPS7/ARMC10/SNAI1/PRKRA/BCL2L11/TNFRSF1B/TRIAP1/ERN1/E2F2/CASP6/HSPA1A/VDAC2/CREB3/PPP1R13B/NDUFS3/ABL1/ZNF385A/AIFM1/PRKCD/DNM1L/SOD2/MYBBP1A/PARP1/STK24/LRRK2/DAPK2/MIF/CLU/RAD9A/HERPUD1/PPIF/PINK1/AKT1/EIF2AK3/SKIL/DNAJC10/MLH1/PTPN1/PLAUR/SFPQ/CASP2/SGPP1/PLA…	121
BP	GO:0046635	positive regulation of alpha-beta T cell activation	41/5019	73/18903	8.21020816777345e-08	2.7923442034438e-06	2.03830140066671e-06	MYB/IL4R/IL23A/CD28/NFKBID/IFNG/CD3E/XCL1/RARA/CD160/CARD11/SASH3/CD55/TGFBR2/ZAP70/LILRB4/RUNX3/IL18/CD83/SOCS5/CBFB/ITPKB/TYK2/ADA/ZBTB7B/NFKBIZ/HLA-E/NLRP3/PTPRC/CCR2/HLA-A/ZBTB16/IL2RG/MALT1/IL12RB1/HSPH1/CD86/SYK/HLX/LGALS9/PTPN22	41
BP	GO:0046637	regulation of alpha-beta T cell differentiation	41/5019	73/18903	8.21020816777345e-08	2.7923442034438e-06	2.03830140066671e-06	MYB/IL4R/IL23A/GATA3/NFKBID/IFNG/RARA/JUNB/ZC3H12A/IRF4/TBX21/SMAD7/SASH3/TGFBR2/ZAP70/LILRB4/RUNX3/PRDM1/BCL6/IL18/CD83/SOCS5/CBFB/ITPKB/BATF/ADA/ZBTB7B/HMGB1/NFKBIZ/NLRP3/JAK3/ZBTB16/SH3RF1/RC3H1/IL2RG/MALT1/IL12RB1/CD86/SYK/HLX/LGALS9	41
BP	GO:0071677	positive regulation of mononuclear cell migration	41/5019	73/18903	8.21020816777345e-08	2.7923442034438e-06	2.03830140066671e-06	CCR7/TNFSF14/C1QBP/FPR2/XCL2/XCL1/CALR/SLAMF1/TNFRSF14/TNF/SPI1/ADAM8/CCR1/CREB3/ITGB3/ABL1/NEDD9/CCL20/SPN/PLA2G7/PTK2B/CCL4/ITGA4/CX3CR1/HMGB1/OXSR1/CCR6/CCL5/LGALS3/CCR2/LGMN/CCL3/MOSPD2/WNK1/CORO1A/APP/CD47/DOCK8/LGALS9/CSF1/CCL1	41
BP	GO:0042116	macrophage activation	55/5019	109/18903	8.36617848391507e-08	2.83033572625148e-06	2.06603371749816e-06	IL4R/IFNG/SLC11A1/IL6/GPR137B/ZC3H12A/TNF/JMJD6/NR1D1/RORA/ITGB2/FCGR3A/TLR1/CRTC3/SBNO2/C5AR1/DYSF/LDLR/LRRK2/MIF/CLU/IFNGR2/MIR128-1/ITGAM/MMP8/GRN/CD93/SUCNR1/FCGR2B/CX3CR1/TYROBP/MIR142/IFI35/PTPRC/IL10/PLCG2/TMEM106A/TLR6/CCL3/TLR4/JUN/BPI/HAVCR2/ATM/IFNGR1/SYK/CEBPA/THBS1/APP/TLR2/CD200/CST7/AZU1/STAP1/IL1RL1	55
BP	GO:0006979	response to oxidative stress	165/5019	434/18903	8.42835480106155e-08	2.83636318936777e-06	2.0704335284159e-06	MAPK13/RBM11/PXN/SESN2/APEX1/IL6/IL1A/CYP1B1/PKD2/PPIA/HDAC2/UBE3A/NEIL1/ZC3H12A/MAPK7/MICB/RPS3/PLEKHA1/TNF/MMP9/MSRB3/MAPK3/HMOX1/PNPT1/MTF1/KEAP1/LANCL1/IPCEF1/PLK3/ALOX5/PRKRA/ERMP1/G6PD/IMPACT/SIRPA/EDN1/ERN1/GSTP1/ATRN/ERCC1/HSPA1A/HP/GPX4/IL18BP/RGS14/TBC1D24/KDM6B/WRN/HSPA1B/ABL1/FOXO1/THG1L/AIFM1/CHD6/ERCC8/EIF2S1/PRKCD/SOD2/PARP1/STK24/LRRK2/FXN/PSMB5/NDUFB4/PPIF/REST/ANKZF1/PINK1/SLC8A…	165
BP	GO:0043161	proteasome-mediated ubiquitin-dependent protein catabolic process	170/5019	450/18903	8.8907822017863e-08	2.97631735069223e-06	2.17259455953268e-06	DNAJB2/ZFAND2A/N4BP1/XPO1/WWP2/AXIN2/FBXL14/TRIM39/SUMO2/RPL11/GSK3A/HFE/UBE2K/CALR/CUL5/SMARCC1/ANAPC5/RBCK1/GLMN/TMUB2/TAF9/PSMD14/KLHL42/STT3B/SGTB/ARAF/FAF1/UBE2G2/PSMA3/ERLIN1/CDC23/UBXN2A/RHBDD2/KEAP1/MTA1/TBX21/SMAD7/PLK3/ZNRF1/FBXO22/ANAPC7/ANAPC1/HUWE1/PSMA1/RNF185/HECTD1/RNF19B/ASCC3/EIF3H/HSP90B1/CDC16/HSPA1A/COMMD1/AREL1/UCHL5/PSMA5/TBL1XR1/HSPA1B/CRBN/KLHDC2/ERCC8/VCP/HERC2/PSMA6/CSN…	170
BP	GO:0036230	granulocyte activation	30/5019	47/18903	9.08670622594932e-08	3.02606247962083e-06	2.20890654637386e-06	CD177/MYD88/STXBP2/CXCR2/TNF/VAMP2/ITGB2/IL15/SPI1/LILRA2/PRKCD/IL18/ITGAM/GRN/ANXA3/FCGR2B/FCER1G/TYROBP/CCL5/PREX1/BCR/CCR2/PTAFR/CD300A/TRAF3IP2/CCL3/F2RL1/SYK/PRAM1/CAMP	30
BP	GO:1904874	positive regulation of telomerase RNA localization to Cajal body	14/5019	15/18903	9.64119764186914e-08	3.19408381979851e-06	2.33155551371954e-06	CCT2/CCT6A/CCT4/CCT8/CCT7/CCT3/SHQ1/NHP2/DKC1/RUVBL1/CCT5/NAF1/NOP10/RUVBL2	14
BP	GO:0062197	cellular response to chemical stress	136/5019	345/18903	1.01433082929451e-07	3.3431089291284e-06	2.44033797997388e-06	MAPK13/ZFP36L1/RBM11/PXN/SESN2/APEX1/IL6/CYP1B1/PKD2/PPIA/HDAC2/LETM1/ZC3H12A/MAPK7/RPS3/PLEKHA1/TNF/MMP9/MAPK3/HMOX1/PNPT1/KEAP1/LANCL1/ALOX5/PRKRA/ERMP1/G6PD/IMPACT/SIRPA/EDN1/ERN1/HSPA1A/IL18BP/TBC1D24/KDM6B/HSPA1B/MICU1/ABL1/FOXO1/AIFM1/CHD6/EIF2S1/MLST8/PRKCD/SOD2/PARP1/STK24/LRRK2/FXN/PPIF/REST/ANKZF1/PINK1/AKT1/EIF2AK3/RELA/TSPO/MGST1/PNPLA8/GCH1/FYN/SFPQ/TXN/FER/ARG1/MAPK8/NCF1/TRIM21/OXS…	136
BP	GO:0009156	ribonucleoside monophosphate biosynthetic process	24/5019	34/18903	1.02128210851015e-07	3.34875784708404e-06	2.44446146781862e-06	UPP1/UCK2/PAICS/IMPDH2/GMPS/ATIC/CDA/PPAT/UMPS/GART/PFAS/APRT/HPRT1/PRPS2/ADSL/DHODH/IMPDH1/AMPD3/AMPD2/CMPK1/ADA/CAD/DCK/ADK	24
BP	GO:0002287	alpha-beta T cell activation involved in immune response	40/5019	71/18903	1.05068351263974e-07	3.41018801006014e-06	2.48930306975399e-06	MYB/IL4R/IL23A/GATA3/NFKBID/IFNG/EOMES/IL6/SEMA4A/RARA/JUNB/ZC3H12A/LY9/BCL3/LEF1/IRF4/TBX21/RORA/SMAD7/BCL6/IL18/SPN/SLAMF6/SOCS5/IL18R1/BATF/ZBTB7B/HMGB1/NFKBIZ/NLRP3/JAK3/STAT3/RC3H1/STAT6/MALT1/IL12RB1/CD86/GPR183/HLX/LGALS9	40
BP	GO:0002293	alpha-beta T cell differentiation involved in immune response	40/5019	71/18903	1.05068351263974e-07	3.41018801006014e-06	2.48930306975399e-06	MYB/IL4R/IL23A/GATA3/NFKBID/IFNG/EOMES/IL6/SEMA4A/RARA/JUNB/ZC3H12A/LY9/BCL3/LEF1/IRF4/TBX21/RORA/SMAD7/BCL6/IL18/SPN/SLAMF6/SOCS5/IL18R1/BATF/ZBTB7B/HMGB1/NFKBIZ/NLRP3/JAK3/STAT3/RC3H1/STAT6/MALT1/IL12RB1/CD86/GPR183/HLX/LGALS9	40
BP	GO:0002709	regulation of T cell mediated immunity	47/5019	89/18903	1.23077278672646e-07	3.97452585774192e-06	2.90124749406971e-06	IL23A/GATA3/XCL1/IL7R/IL6/HFE/SLAMF1/LILRB1/KLRD1/WAS/TBX21/SMAD7/SASH3/KLRC1/CEACAM1/CD55/TNFRSF1B/NOD2/LILRB4/IL18/DENND1B/IL18R1/FCGR2B/ARG1/HMGB1/IL1B/MR1/TAP2/RIPK3/IL1R1/HLA-E/HLA-F/NLRP3/PTPRC/CCR2/HLA-A/HLA-B/CD1D/MALT1/IL12RB1/ARID5A/HLA-H/FUT7/STX7/P2RX7/DUSP22/CD1C	47
BP	GO:0002456	T cell mediated immunity	56/5019	113/18903	1.41084880846965e-07	4.53314938761554e-06	3.30902069122159e-06	IL23A/GATA3/XCL1/IL7R/IL6/HFE/GZMM/SLAMF1/LILRB1/KLRD1/WAS/CD8A/TBX21/SMAD7/SASH3/KLRC1/CEACAM1/CD55/ICAM1/TNFRSF1B/HPRT1/NOD2/LILRB4/IL18/DENND1B/CTSH/BTN3A3/IL18R1/PRF1/FCGR2B/BTN3A2/ARG1/HMGB1/IL1B/MR1/TAP2/RIPK3/IL1R1/HLA-E/HLA-F/NLRP3/PTPRC/CCR2/HLA-A/HLA-B/CD1D/MALT1/IL12RB1/ARID5A/HLA-H/FUT7/MYO1G/STX7/P2RX7/DUSP22/CD1C	56
BP	GO:0051054	positive regulation of DNA metabolic process	121/5019	301/18903	1.46796354574804e-07	4.6930794557565e-06	3.42576334834044e-06	CD28/CCT2/CD40/GNL3/CCT6A/CCT4/CCT8/HNRNPA1/IL6/CYP1B1/CCT7/CCT3/SMARCC1/STOML2/MAPKAPK5/PRKDC/MECP2/DKC1/MSH2/OTUD4/SETMAR/RPS3/WAS/FAF1/TNF/POT1/RFC3/MAPK3/PARN/PRIM2/TBX21/PRKD2/SSBP1/UBE2V2/ACTL6A/TFPT/SMARCA4/HNRNPAB/POLG2/CTC1/MEAF6/ERCC1/UCHL5/WRN/PHF10/SMARCE1/RUVBL1/PRKCD/TINF2/PARP1/TP53BP1/HSP90AB1/MBTD1/RIF1/DHX9/MORF4L2/NVL/PBRM1/RAD50/ARRB2/CCT5/HNRNPD/AKT1/PTK2B/PTGES3/MLH1/EXOSC6/…	121
BP	GO:0072676	lymphocyte migration	60/5019	124/18903	1.51904265570038e-07	4.83221827887972e-06	3.52732921465069e-06	CCR7/TNFSF14/EXT1/GATA3/XCL2/CXCL16/PADI2/XCL1/CRTAM/STK10/TNFRSF14/PIK3CD/S1PR1/TBX21/ICAM1/ZAP70/GPR15/ADAM8/ITGB3/ABL1/NEDD9/CD99/CCL20/SPN/ITGAL/AKT1/PTK2B/SPNS2/CCL4/ITGA4/OXSR1/CCR6/CCL5/MSN/SLC12A2/RIPK3/CCL4L1/CCR2/LRCH1/GCSAML/DEFA1B/CCL3/WNK1/CYP7B1/CKLF/CORO1A/FUT7/CCL3L3/MYO1G/PIK3CG/APP/PLEC/GPR183/ITGB7/DOCK8/IL27RA/CD200/CCL23/CD200R1/CCL1	60
BP	GO:0042119	neutrophil activation	27/5019	41/18903	1.55185856494693e-07	4.91217013082707e-06	3.58569092077889e-06	CD177/MYD88/STXBP2/CXCR2/TNF/ITGB2/IL15/SPI1/LILRA2/PRKCD/IL18/ITGAM/GRN/ANXA3/FCGR2B/FCER1G/TYROBP/CCL5/PREX1/BCR/PTAFR/CD300A/TRAF3IP2/F2RL1/SYK/PRAM1/CAMP	27
BP	GO:0030888	regulation of B cell proliferation	38/5019	67/18903	1.71706458119252e-07	5.4083305084458e-06	3.94786847446598e-06	BLK/CD22/FCRL3/TNFRSF13C/CD40/IKZF3/BMI1/CARD11/SASH3/SLC39A10/CTLA4/BCL6/MIF/LYN/FCGR2B/CD38/ADA/TYROBP/BST1/PTPRC/IL10/CASP3/MNDA/CD300A/RC3H1/ATAD5/TLR4/PELI1/ATM/CDKN1A/TFRC/PTEN/TNFRSF21/GPR183/TNFSF13B/IRS2/VAV3/NFATC2	38
BP	GO:0038093	Fc receptor signaling pathway	33/5019	55/18903	1.79552291883025e-07	5.62773212892187e-06	4.10802302481596e-06	LILRA4/LCK/KIT/VAV1/APPL1/CD247/PLD2/FGR/FCGR3A/CLEC4E/CLEC4D/ABL1/PRKCD/HCK/LYN/FYN/FCGR2B/FER/FCER1G/MAPK8/PLCG1/PTPRJ/PTPRC/PLCG2/FCGR1A/PAK1/SYK/MYO1G/YES1/CD47/NR4A3/CD200R1/VAV3	33
BP	GO:2001242	regulation of intrinsic apoptotic signaling pathway	77/5019	172/18903	1.83795659429103e-07	5.73263144580335e-06	4.18459539876069e-06	LCK/RPL26/GRINA/KDM1A/RPL11/PPIA/XBP1/TAF9/MAPK7/PTPMT1/RPS3/URI1/MMP9/RPS7/ARMC10/SNAI1/PRKRA/BCL2L11/TRIAP1/HSPA1A/VDAC2/CREB3/NDUFS3/ZNF385A/DNM1L/SOD2/PARP1/LRRK2/DAPK2/MIF/CLU/RAD9A/HERPUD1/PPIF/PINK1/AKT1/EIF2AK3/SKIL/PTPN1/PLAUR/SFPQ/PLAGL2/OPA1/NCK2/STYXL1/RIPK3/RRN3/FBXW7/ENO1/S100A8/TAF9B/MYC/NACC2/S100A9/HSPB1/TMBIM6/FIGNL1/SLC9A3R1/BID/IVNS1ABP/HIF1A/HELLS/CYLD/VNN1/ATAD5/MIR186/PTGS2…	77
BP	GO:0006402	mRNA catabolic process	103/5019	248/18903	1.89409502762879e-07	5.8790502944944e-06	4.29147539729486e-06	EIF3E/NPM1/ZFP36L1/FASTKD1/PAIP1/GTPBP1/MYD88/AXIN2/SLC11A1/SYNCRIP/APEX1/POLR2D/MTPAP/SERBP1/FASTKD2/EXOSC2/ZC3H12A/PATL1/FXR1/DIS3/TTC5/NCBP2/SND1/PNPT1/PARN/EXOSC8/MRTO4/IGF2BP2/NCBP1/SSB/PATL2/ZC3H14/YTHDF2/TNRC6C/CNOT7/HNRNPAB/DHX34/ZC3H12D/ERN1/YBX1/MAGOHB/HSPA1A/KHSRP/UPF1/EIF4A3/TOB1/HSPA1B/ZFP36/EXOSC5/PRKCD/LSM7/DHX9/BTG2/PAN3/ELAVL1/HNRNPC/LSM4/HNRNPD/TARDBP/AKT1/RBM38/HNRNPA0/PUM2/CPE…	103
BP	GO:0002886	regulation of myeloid leukocyte mediated immunity	35/5019	60/18903	2.03914046291847e-07	6.2986783187926e-06	4.59778734430739e-06	BLK/CD177/IL4R/DDX1/STXBP2/VAMP8/FGR/HMOX1/ITGB2/RAC2/SPI1/RABGEF1/ITGAM/LYN/FCGR2B/CX3CR1/FER/ARG1/TYROBP/C12orf4/SNX4/HLA-E/BCR/MAVS/GATA2/CCR2/PTAFR/CD300A/F2RL1/FCGR1A/SYK/UNC13D/PRAM1/LGALS9/STAP1	35
BP	GO:0002294	CD4-positive, alpha-beta T cell differentiation involved in immune response	39/5019	70/18903	2.25851867736032e-07	6.94277328030861e-06	5.06795132359093e-06	MYB/IL4R/IL23A/GATA3/NFKBID/IFNG/IL6/SEMA4A/RARA/JUNB/ZC3H12A/LY9/BCL3/LEF1/IRF4/TBX21/RORA/SMAD7/BCL6/IL18/SPN/SLAMF6/SOCS5/IL18R1/BATF/ZBTB7B/HMGB1/NFKBIZ/NLRP3/JAK3/STAT3/RC3H1/STAT6/MALT1/IL12RB1/CD86/GPR183/HLX/LGALS9	39
BP	GO:0071887	leukocyte apoptotic process	57/5019	117/18903	2.30058026991711e-07	7.03823456739233e-06	5.13763430713294e-06	CCR7/BLK/PLEKHO2/BCL11B/IL7R/IL6/CD27/CD274/RPS6/MIAT/LILRB1/SLC46A2/CXCR2/CD3G/BCL3/PIK3CD/PRKD2/DFFA/SLC39A10/BCL2L11/ADAM8/NOD2/HCLS1/ST6GAL1/FASLG/BCL10/BCL6/MIF/ZC3H8/GIMAP8/HCAR2/AKT1/GPAM/ITPKB/LYN/ADA/CCL5/RIPK3/LGALS3/LMBR1L/JAK3/IL10/KIFAP3/CASP3/HIF1A/TRAF3IP2/FAS/PRELID1/BCL2L1/PTEN/TNFRSF21/NF1/DOCK8/LGALS9/P2RX7/TP53/IRS2	57
BP	GO:0034250	positive regulation of cellular amide metabolic process	76/5019	170/18903	2.35711523934018e-07	7.17685468587673e-06	5.23882153946585e-06	EIF3E/C1QBP/NPM1/CD28/RPL26/PAIP1/IFNG/EIF2AK4/EPHA4/SYNCRIP/EIF3D/IL6/POLR2D/GSK3A/CYP1B1/FASTKD2/METTL5/EEF2/PCIF1/PRKDC/MRPS27/FXR1/PPP1R15A/LARP4/METTL8/NAT10/TNF/BCL3/EIF3C/TRUB2/LARP1B/YTHDF2/GUF1/IMPACT/YBX1/EIF4A3/NOD2/TOB1/KHDRBS1/PRKCD/DHX9/SOX4/CLU/ELAVL1/ZCCHC4/RPS4X/PINK1/HNRNPD/RMND1/PTK2B/EIF2S3/CPEB3/METTL14/GSAP/RELA/UPF3A/CDC123/METTL3/CSDE1/POLR2G/TRMT10C/CCL5/PICALM/NCK2/PLD1/…	76
BP	GO:1903320	regulation of protein modification by small protein conjugation or removal	104/5019	252/18903	2.40200772851973e-07	7.27888029201666e-06	5.31329621763856e-06	DNAJB2/N4BP1/NPM1/TNIP1/GNL3/UBA2/SIRT7/KDM1A/RPL11/GSK3A/GLMN/PPIA/RASSF5/RPS20/UBE3A/ZC3H12A/OTUD4/RPS3/BMI1/UBXN2A/MTA1/GTPBP4/RPS7/SMAD7/FANCM/DCUN1D5/RPS2/UBE2V2/COPS7A/RNF111/HUWE1/DCUN1D4/HSPA1A/HMG20A/COMMD1/NOD2/HDAC8/HSPA1B/ABL1/BIRC3/PRMT3/VCP/BCL10/HSP90AB1/LRRK2/MTBP/SOX4/RPL37/HERPUD1/GABARAP/AMER1/ARRB2/PIAS1/PINK1/AKT1/UBE2D1/ARRB1/RELA/TSPO/SASH1/TBC1D7/FYN/SKP2/MYCBP2/CDC14B/TRI…	104
BP	GO:0032930	positive regulation of superoxide anion generation	16/5019	19/18903	2.46000839596083e-07	7.28208040915443e-06	5.31563217723701e-06	CD177/FPR2/ITGB2/GSTP1/PRKCD/ITGAM/GNAI2/CLEC7A/TYROBP/HVCN1/F2RL1/GNAI3/TGFB1/SYK/CYBA/SOD1	16
BP	GO:0090670	RNA localization to Cajal body	16/5019	19/18903	2.46000839596083e-07	7.28208040915443e-06	5.31563217723701e-06	CCT2/CCT6A/CCT4/CCT8/CCT7/CCT3/SHQ1/NHP2/DKC1/PARN/RUVBL1/CCT5/NAF1/EXOSC10/NOP10/RUVBL2	16
BP	GO:0090671	telomerase RNA localization to Cajal body	16/5019	19/18903	2.46000839596083e-07	7.28208040915443e-06	5.31563217723701e-06	CCT2/CCT6A/CCT4/CCT8/CCT7/CCT3/SHQ1/NHP2/DKC1/PARN/RUVBL1/CCT5/NAF1/EXOSC10/NOP10/RUVBL2	16
BP	GO:0090672	telomerase RNA localization	16/5019	19/18903	2.46000839596083e-07	7.28208040915443e-06	5.31563217723701e-06	CCT2/CCT6A/CCT4/CCT8/CCT7/CCT3/SHQ1/NHP2/DKC1/PARN/RUVBL1/CCT5/NAF1/EXOSC10/NOP10/RUVBL2	16
BP	GO:0090685	RNA localization to nucleus	16/5019	19/18903	2.46000839596083e-07	7.28208040915443e-06	5.31563217723701e-06	CCT2/CCT6A/CCT4/CCT8/CCT7/CCT3/SHQ1/NHP2/DKC1/PARN/RUVBL1/CCT5/NAF1/EXOSC10/NOP10/RUVBL2	16
BP	GO:0032635	interleukin-6 production	78/5019	176/18903	2.55536839463865e-07	7.49496583271538e-06	5.47103016022586e-06	MAPK13/MYD88/IFNG/C5AR2/IL6/IL1A/SLAMF1/POU2AF1/LILRA5/XBP1/ZC3H12A/PTPN11/TNF/LILRB2/NLRP12/MBP/TLR1/SIRPA/IL16/TLR8/NOD2/LILRA2/C1QTNF3/LILRB4/BCL10/RABGEF1/DHX9/AKIRIN2/ARRB2/SOCS5/POU2F2/MMP8/CLEC7A/ARRB1/ORM1/CSK/HMGB1/TYROBP/IL1B/SCIMP/MAVS/NOD1/SIGLEC16/KLF2/IL17RA/PTAFR/TNFAIP3/IL10/C1QTNF4/PLCG2/STAT3/TMEM106A/HLA-B/TLR6/TLR7/TLR4/BPI/F2RL1/IFIH1/IL1RAP/HAVCR2/BANK1/ARID5A/SYK/APP/CD47/C…	78
BP	GO:0032675	regulation of interleukin-6 production	78/5019	176/18903	2.55536839463865e-07	7.49496583271538e-06	5.47103016022586e-06	MAPK13/MYD88/IFNG/C5AR2/IL6/IL1A/SLAMF1/POU2AF1/LILRA5/XBP1/ZC3H12A/PTPN11/TNF/LILRB2/NLRP12/MBP/TLR1/SIRPA/IL16/TLR8/NOD2/LILRA2/C1QTNF3/LILRB4/BCL10/RABGEF1/DHX9/AKIRIN2/ARRB2/SOCS5/POU2F2/MMP8/CLEC7A/ARRB1/ORM1/CSK/HMGB1/TYROBP/IL1B/SCIMP/MAVS/NOD1/SIGLEC16/KLF2/IL17RA/PTAFR/TNFAIP3/IL10/C1QTNF4/PLCG2/STAT3/TMEM106A/HLA-B/TLR6/TLR7/TLR4/BPI/F2RL1/IFIH1/IL1RAP/HAVCR2/BANK1/ARID5A/SYK/APP/CD47/C…	78
BP	GO:0050858	negative regulation of antigen receptor-mediated signaling pathway	23/5019	33/18903	2.74113067302517e-07	7.96672251060135e-06	5.81539397329838e-06	CD22/FCRL3/UBASH3A/CD160/BTN2A2/CEACAM1/LILRB4/PHPT1/PVRIG/PLCL2/FCGR2B/PTPRJ/ELF1/GBP1/LGALS3/EZR/CD300A/LAPTM5/CBLB/PRNP/PTPN6/DUSP22/PTPN22	23
BP	GO:0071353	cellular response to interleukin-4	23/5019	33/18903	2.74113067302517e-07	7.96672251060135e-06	5.81539397329838e-06	TCF7/IL4R/RPLP0/GATA3/CDK4/XCL1/IMPDH2/XBP1/LEF1/KEAP1/HSP90AB1/FASN/ARG1/CD300LF/JAK3/STAT6/TUBA1B/IL2RG/MCM2/CORO1A/ALAD/NFIL3/HSPA5	23
BP	GO:0051607	defense response to virus	121/5019	304/18903	2.75738349833402e-07	7.97769687255553e-06	5.82340482572663e-06	C1QBP/IL23A/DDX1/MYD88/CD40/ZBP1/IFNG/G3BP1/EIF2AK4/OASL/IL6/ABCF3/MAP3K14/VAMP8/LILRB1/ZC3H12A/MICB/POLR3D/ZNFX1/NCBP1/NLRC5/NLRP1/IRF1/ISG20/ZMYND11/CNOT7/RNF185/DHX15/POLR3C/ITGAX/IL15/IFITM2/IFITM1/IRF2/TLR8/APOBEC3A/BIRC3/EXOSC5/ANKRD17/MX2/DHX9/IFNGR2/IRF9/ATAD3A/NDUFAF4/TRIM26/IL10RB/IFITM3/PUM2/POLR3K/GPAM/RELA/IFIT2/ATG16L1/MLKL/PRF1/CHMP3/POLR3G/TRAF3/APOBEC3B/SKP2/PHB2/DDX17/TRIM21/IL1…	121
BP	GO:0006413	translational initiation	59/5019	123/18903	2.80981739510884e-07	8.092780371318e-06	5.90741125173666e-06	EIF3E/NPM1/BZW2/DDX1/EIF3M/ABCE1/PAIP1/EIF1AD/RPS17/EIF2AK4/EIF3D/EIF3J/POLR2D/EIF3B/EIF2D/PPP1R15A/RPS3/NCBP2/TNF/RPS5/EIF3L/EIF2A/EIF3CL/NCBP1/EIF3C/DENR/EIF1AX/YTHDF2/EIF4B/IMPACT/EIF3H/KHDRBS1/EIF5B/EIF2S1/EIF3I/MTIF2/EIF4A1/EIF2B3/EIF2S2/EIF2S3/EIF2AK3/CDC123/METTL3/TMED2/CSDE1/EIF3A/POLR2G/CCL5/NCK2/EIF3K/DHX33/PPP1R15B/LARP1/HSPB1/MTIF3/EIF4E3/EIF3F/BANK1/EIF3G	59
BP	GO:0010563	negative regulation of phosphorus metabolic process	165/5019	441/18903	2.82496864299383e-07	8.09993251269174e-06	5.91263203353064e-06	ADORA2A/IPO7/NPM1/DUSP16/IPO5/INPP5K/IFNG/GSK3A/IBTK/PRKDC/PPIA/PIP4K2C/SNX25/SMPD1/PIK3IP1/ZC3H12A/PPP1R15A/PIBF1/PWP1/CDA/SH3BP5/URI1/TNF/TIPRL/SMAD7/NLRP12/SH3BP5L/HEG1/GADD45B/SMYD3/MVP/CEACAM1/IMPACT/SIRPA/ZNF675/SEMA4D/GSTP1/SOCS3/NF2/RGS14/YWHAG/LPCAT1/ABL1/LILRB4/CEP85/PIP4K2B/DEPTOR/PRKCD/PARP1/RABGEF1/TFAP4/DUSP1/LRRK2/RGS2/LRP5/ARRB2/SOCS5/SLC8A1/TARDBP/AKT1/GNAI2/SMCR8/DNAJC10/TSPO/CH…	165
BP	GO:0006457	protein folding	94/5019	223/18903	2.84811970992311e-07	8.12985599341444e-06	5.93447499708602e-06	DNAJB2/HSPA6/BAG3/ST13/CCT2/DNAJB1/DNAJA4/SACS/HSPA1L/CCT6A/CCT4/CCT8/HSPA7/RIC3/CCT7/CALR/CCT3/PPIA/ERP27/TOR2A/ARL2/LMAN1/PDCL3/TBCE/HSPA2/PPIH/PFDN2/LYRM7/DFFA/WIPF1/PPIAL4D/HSP90AB3P/TXNDC5/DNAJC21/HSP90B1/HSPA1A/KHSRP/QSOX1/HSPA4/PPIAL4E/HSPA1B/PDCD5/PPIAL4G/HSP90AB1/DNAJC5/CLU/PPIL1/HYPK/PPIF/CLPX/CCT5/PFDN4/CSNK2A1/GRN/CANX/PTGES3/DNAJC10/DNAJC19/PDIA6/PPIL3/TOR1B/CWC27/STIP1/DNAJC2/SDF2/D…	94
BP	GO:0002687	positive regulation of leukocyte migration	68/5019	148/18903	2.86125767164391e-07	8.13105846777384e-06	5.93535275605571e-06	CCR7/TNFSF14/C1QBP/IL23A/FPR2/XCL2/GPSM3/XCL1/IL6/IL1A/CALR/SLAMF1/CXCR2/TNFRSF14/TNF/MAPK3/CMKLR1/RAC2/ICAM1/EDN1/SPI1/ADAM8/CCR1/CREB3/C5AR1/ITGB3/ABL1/NEDD9/CD99/CCL20/DNM1L/DAPK2/SPN/PLA2G7/PTK2B/CCL4/ITGA4/CX3CR1/HMGB1/OXSR1/MAPK1/CCR6/CCL5/SELP/IL1R1/MCU/LGALS3/CCR2/PTAFR/VEGFA/LGMN/P2RY12/CCL3/MOSPD2/WNK1/F2RL1/CSF1R/CORO1A/PIK3R1/FUT7/THBS1/APP/CD47/JAM3/DOCK8/LGALS9/CSF1/CCL1	68
BP	GO:0150076	neuroinflammatory response	40/5019	73/18903	2.89674412462466e-07	8.19547873134959e-06	5.98237701378004e-06	ADORA2A/IFNG/IL6/TNF/MMP9/NR1D1/ITGB2/TNFRSF1B/C5AR1/LDLR/LRRK2/IL18/CLU/IFNGR2/MIR128-1/ITGAM/MMP8/GRN/MIR181B1/CX3CR1/LRP1/TYROBP/IL1B/MIR142/PTPRC/PLCG2/CCL3/PTGS2/JUN/PSEN1/ATM/IFNGR1/APP/TLR2/CD200/CST7/BPGM/CD200R1/AZU1/STAP1	40
BP	GO:0032755	positive regulation of interleukin-6 production	50/5019	99/18903	3.07765280458449e-07	8.66894803194416e-06	6.32799097404481e-06	MAPK13/MYD88/IFNG/IL6/IL1A/POU2AF1/LILRA5/XBP1/PTPN11/TNF/LILRB2/MBP/TLR1/IL16/TLR8/NOD2/LILRA2/BCL10/DHX9/AKIRIN2/POU2F2/MMP8/CLEC7A/HMGB1/TYROBP/IL1B/SCIMP/MAVS/NOD1/SIGLEC16/IL17RA/PTAFR/C1QTNF4/PLCG2/STAT3/TMEM106A/TLR6/TLR7/TLR4/F2RL1/IFIH1/IL1RAP/ARID5A/SYK/APP/CYBA/CD36/TLR2/LGALS9/P2RX7	50
BP	GO:0002707	negative regulation of lymphocyte mediated immunity	33/5019	56/18903	3.25839992315579e-07	9.09790790771096e-06	6.64111480545748e-06	CR2/KIR2DL4/XCL1/IL7R/HFE/SLAMF1/LILRB1/KLRD1/THOC1/TBX21/SMAD7/KLRC1/CR1L/SERPINB9/CEACAM1/CD55/NOD2/LILRB4/CR1/BCL6/ARRB2/FCGR2B/ARG1/HLA-E/HLA-F/PTPRC/HLA-A/HLA-B/HAVCR2/CLEC12B/LGALS9/PTPN6/DUSP22	33
BP	GO:0043370	regulation of CD4-positive, alpha-beta T cell differentiation	33/5019	56/18903	3.25839992315579e-07	9.09790790771096e-06	6.64111480545748e-06	MYB/IL4R/IL23A/GATA3/NFKBID/IFNG/RARA/JUNB/ZC3H12A/IRF4/TBX21/SMAD7/SASH3/RUNX3/BCL6/IL18/CD83/SOCS5/CBFB/BATF/ZBTB7B/HMGB1/NFKBIZ/NLRP3/JAK3/SH3RF1/RC3H1/IL2RG/MALT1/IL12RB1/CD86/HLX/LGALS9	33
BP	GO:0140546	defense response to symbiont	121/5019	305/18903	3.38749602023278e-07	9.4140417563719e-06	6.87188007634674e-06	C1QBP/IL23A/DDX1/MYD88/CD40/ZBP1/IFNG/G3BP1/EIF2AK4/OASL/IL6/ABCF3/MAP3K14/VAMP8/LILRB1/ZC3H12A/MICB/POLR3D/ZNFX1/NCBP1/NLRC5/NLRP1/IRF1/ISG20/ZMYND11/CNOT7/RNF185/DHX15/POLR3C/ITGAX/IL15/IFITM2/IFITM1/IRF2/TLR8/APOBEC3A/BIRC3/EXOSC5/ANKRD17/MX2/DHX9/IFNGR2/IRF9/ATAD3A/NDUFAF4/TRIM26/IL10RB/IFITM3/PUM2/POLR3K/GPAM/RELA/IFIT2/ATG16L1/MLKL/PRF1/CHMP3/POLR3G/TRAF3/APOBEC3B/SKP2/PHB2/DDX17/TRIM21/IL1…	121
BP	GO:0006177	GMP biosynthetic process	13/5019	14/18903	3.40106919881437e-07	9.4140417563719e-06	6.87188007634674e-06	PAICS/IMPDH2/GMPS/ATIC/PPAT/GART/PFAS/APRT/HPRT1/ADSL/IMPDH1/ADA/ADK	13
BP	GO:0036037	CD8-positive, alpha-beta T cell activation	20/5019	27/18903	3.44478965128565e-07	9.49395906479329e-06	6.93021656706015e-06	GPR18/EOMES/XCL1/HFE/CD274/LILRB1/CRTAM/CLEC4A/IRF1/LILRB4/RUNX3/CBFB/TNFSF8/ZBTB7B/HLA-E/HLA-A/SH3RF1/WDFY4/TOX/PTPN22	20
BP	GO:0006261	DNA-templated DNA replication	74/5019	166/18903	3.87430036080593e-07	1.05864429517065e-05	7.72768681952924e-06	SIRT7/STOML2/NUCKS1/CDK2AP1/THOC1/SETMAR/BLM/ZRANB3/RFC3/PRIM2/FANCM/POLA1/SSBP1/WRNIP1/WDR18/POLG2/POLE3/ETAA1/UPF1/REV3L/WRN/PARP1/MCM3/BCL6/LIG3/POLD2/MCM4/PRIM1/POLD4/RAD50/RPAIN/MCM6/NOC3L/WDHD1/DSCC1/SRPK2/ATR/GINS2/TERF2/RFC4/GINS1/RFC5/ORC2/MCM7/BRCA2/ORC4/TERF1/TIPIN/MMS22L/ORC3/RBBP8/GEN1/BRCA1/ORC5/ATAD5/DDX11/GMNN/CDC7/FEN1/CDC45/MCM2/PCNA/POLE2/RPA1/BOD1L1/TOPBP1/MCM10/RRM1/CDC6/SAMH…	74
BP	GO:0051236	establishment of RNA localization	74/5019	166/18903	3.87430036080593e-07	1.05864429517065e-05	7.72768681952924e-06	XPO1/NPM1/ZFP36L1/LRPPRC/SEH1L/RAN/HNRNPA1L2/HNRNPA1/POLR2D/TOMM20/THOC1/XPOT/NUP133/NCBP2/NUP107/CKAP5/PNPT1/XPO5/NDC1/FYTTD1/IGF2BP2/NXF1/NCBP1/SSB/NUP43/MVP/TGFBR2/YBX1/NUP160/NPIPA1/MAGOHB/THOC7/FLOT1/KHSRP/UPF1/EIF4A3/KHDRBS1/ZFP36/MX2/NUTF2/DHX9/SIDT2/RBM15B/SIDT1/NSUN2/PHAX/NUP35/CETN3/NUP54/CASC3/UPF3A/NUP155/NUP37/ATR/THOC2/NUP205/NUP188/CPSF6/UPF2/PCID2/TERF1/SRSF1/AGFG1/HHEX/KPNB1/RBM8…	74
BP	GO:0002262	myeloid cell homeostasis	75/5019	169/18903	4.03213941915476e-07	1.09708508281172e-05	8.00828944435932e-06	MYB/ZFP36L1/CDK6/GATA3/RPS17/RPS19/RPS24/KIT/IL6/SLC15A4/RPS6/PRKDC/TGFBR3/CXCR2/PRMT1/ETS1/JMJD6/UBA5/HMOX1/PIK3CD/ID2/SLC25A5/BCL2L11/G6PD/MTHFD1/GCNT4/SPI1/HSPA1A/HCLS1/HSPA1B/SMAD5/ZFP36/STAT5B/ACVR2A/TMEM14C/XKR8/BCL6/HCAR2/ITPKB/LYN/MAFB/HMGB1/MAPK14/FOXO3/IREB2/IKZF1/KLF2/GATA2/JAK3/CDK5RAP3/ALAS1/RPS14/STAT3/CASP3/HIF1A/VEGFA/TRAF3IP2/PRDX1/NCSTN/KCNQ1/SH2B3/ACVR1B/UFL1/HOXA5/SLC25A40/JAM…	75
BP	GO:0045936	negative regulation of phosphate metabolic process	164/5019	440/18903	4.05399787593437e-07	1.09835857706459e-05	8.01758545133497e-06	ADORA2A/IPO7/NPM1/DUSP16/IPO5/INPP5K/IFNG/IBTK/PRKDC/PPIA/PIP4K2C/SNX25/SMPD1/PIK3IP1/ZC3H12A/PPP1R15A/PIBF1/PWP1/CDA/SH3BP5/URI1/TNF/TIPRL/SMAD7/NLRP12/SH3BP5L/HEG1/GADD45B/SMYD3/MVP/CEACAM1/IMPACT/SIRPA/ZNF675/SEMA4D/GSTP1/SOCS3/NF2/RGS14/YWHAG/LPCAT1/ABL1/LILRB4/CEP85/PIP4K2B/DEPTOR/PRKCD/PARP1/RABGEF1/TFAP4/DUSP1/LRRK2/RGS2/LRP5/ARRB2/SOCS5/SLC8A1/TARDBP/AKT1/GNAI2/SMCR8/DNAJC10/TSPO/CHMP6/PT…	164
BP	GO:0061900	glial cell activation	32/5019	54/18903	4.10758166386972e-07	1.10818047083473e-05	8.08928141132504e-06	ADORA2A/IFNG/IL6/TNF/NR1D1/ITGB2/C5AR1/LDLR/LRRK2/CLU/IFNGR2/MIR128-1/ITGAM/MMP8/GRN/MIR181B1/CX3CR1/LRP1/TYROBP/IL1B/MIR142/PTPRC/CCL3/JUN/PSEN1/ATM/IFNGR1/APP/TLR2/CST7/AZU1/STAP1	32
BP	GO:0042269	regulation of natural killer cell mediated cytotoxicity	29/5019	47/18903	4.30394777546173e-07	1.15627907883623e-05	8.44038232481084e-06	NCR3/KIR2DL4/RASGRP1/VAV1/NCR1/CD160/LILRB1/CRTAM/KLRD1/KLRC1/SERPINB9/KLRB1/CEACAM1/KLRC4/CD226/STAT5B/KLRC2/SLAMF6/KLRC3/ARRB2/AP1G1/HLA-E/HLA-F/PIK3R6/HLA-A/HLA-B/HAVCR2/CLEC12B/LGALS9	29
BP	GO:0001912	positive regulation of leukocyte mediated cytotoxicity	34/5019	59/18903	4.53728695359139e-07	1.20880886588597e-05	8.82382910185272e-06	IL23A/NCR3/XCL1/RASGRP1/VAV1/CD160/CRTAM/KLRD1/SPI1/KLRC4/CD226/STAT5B/KLRC2/SLAMF6/KLRC3/ITGAM/ARG1/TYROBP/MR1/AP1G1/TAP2/HLA-E/HLA-F/PTPRC/HLA-A/HLA-B/CD1D/F2RL1/IL12RB1/HLA-H/STX7/P2RX7/CD1C/STAP1	34
BP	GO:0009161	ribonucleoside monophosphate metabolic process	34/5019	59/18903	4.53728695359139e-07	1.20880886588597e-05	8.82382910185272e-06	UPP1/UCK2/PAICS/IMPDH2/GMPS/ATIC/CDA/PPAT/UMPS/CARD11/GART/AK3/PFAS/APRT/HPRT1/PRPS2/ADSL/DHODH/IMPDH1/UPB1/AMPD3/AMPD2/CMPK1/AK2/NT5C/ADA/CAD/AK4/DCK/DLG1/ADK/DPYD/MPP1/CASK	34
BP	GO:0032612	interleukin-1 production	61/5019	130/18903	4.68454498497918e-07	1.23772647247756e-05	9.03491625202161e-06	CCR7/MYD88/IFNG/IL6/LILRA5/HDAC2/ZC3H12A/TNF/MEFV/NLRC4/NLRP12/NLRP1/CEACAM1/SIRPA/IL16/GSTP1/S1PR3/TLR8/NOD2/LILRA2/LILRB4/CARD16/ARRB2/CLEC7A/ORM1/CX3CR1/HMGB1/TYROBP/ORM2/MIR142/CASP1/NOD1/AIM2/NAIP/NLRP3/GBP5/HSPB1/TNFAIP3/IL10/HK1/STAT3/MNDA/TMEM106A/TLR6/CCL3/TLR4/MALT1/F2RL1/SMAD3/HAVCR2/PYHIN1/IL1R2/APP/TMED10/CD36/TRIM16/SERPINB1/LGALS9/P2RX7/AZU1/EGR1	61
BP	GO:0032652	regulation of interleukin-1 production	61/5019	130/18903	4.68454498497918e-07	1.23772647247756e-05	9.03491625202161e-06	CCR7/MYD88/IFNG/IL6/LILRA5/HDAC2/ZC3H12A/TNF/MEFV/NLRC4/NLRP12/NLRP1/CEACAM1/SIRPA/IL16/GSTP1/S1PR3/TLR8/NOD2/LILRA2/LILRB4/CARD16/ARRB2/CLEC7A/ORM1/CX3CR1/HMGB1/TYROBP/ORM2/MIR142/CASP1/NOD1/AIM2/NAIP/NLRP3/GBP5/HSPB1/TNFAIP3/IL10/HK1/STAT3/MNDA/TMEM106A/TLR6/CCL3/TLR4/MALT1/F2RL1/SMAD3/HAVCR2/PYHIN1/IL1R2/APP/TMED10/CD36/TRIM16/SERPINB1/LGALS9/P2RX7/AZU1/EGR1	61
BP	GO:0034614	cellular response to reactive oxygen species	68/5019	150/18903	5.30577108731879e-07	1.39609466388133e-05	1.01909417375662e-05	MAPK13/PXN/APEX1/IL6/CYP1B1/PKD2/HDAC2/MAPK7/RPS3/PLEKHA1/MMP9/MAPK3/IMPACT/SIRPA/EDN1/ERN1/IL18BP/KDM6B/ABL1/AIFM1/PRKCD/SOD2/LRRK2/FXN/PPIF/ANKZF1/PINK1/AKT1/RELA/GCH1/FYN/TXN/FER/ARG1/MAPK8/NCF1/NET1/MAPK1/FOXO3/RIPK3/CAT/OSER1/RHOB/KLF2/AKR1C3/NQO1/TNFAIP3/IL10/BNIP3/PRDX3/NME8/ZNF277/PRDX1/STAT6/FOS/JUN/CAMKK2/PRKAA1/PCNA/MMP2/PRDX5/HGF/CD36/SOD1/EZH2/NR4A3/MPO/MAP3K5	68
BP	GO:0022408	negative regulation of cell-cell adhesion	86/5019	202/18903	5.39826464210233e-07	1.41007456182957e-05	1.02929894920441e-05	ADORA2A/IL4R/SOCS6/ZNF703/IL1RN/XCL1/HFE/ABAT/CD274/GLMN/LILRB1/CRTAM/ZC3H12A/MAPK7/TNFRSF14/PDE5A/LILRB2/TBX21/GTPBP4/SMAD7/BTN2A2/IRF1/YTHDF2/MBP/CEACAM1/TWSG1/SPI1/NF2/AKNA/ABL1/LILRB4/PRKCD/CR1/CTLA4/RUNX3/BCL6/SPN/ZC3H8/MAP2K5/SOCS5/CBFB/AKT1/PAG1/PDCD1LG2/FCGR2B/METTL3/ARG1/ZBTB7B/HMGB1/DLG1/PRKAR1A/LGALS3/JAK3/LGALS9C/IL10/CASP3/CD300A/VEGFA/RDX/RC3H1/LAPTM5/FXYD5/LGALS9B/KLF4/WNK1/PELI1/S…	86
BP	GO:0046209	nitric oxide metabolic process	43/5019	82/18903	5.40300700106733e-07	1.41007456182957e-05	1.02929894920441e-05	IFNG/POR/DNM2/CYP1B1/PKD2/ZC3H12A/TNF/RORA/CYB5R3/SIRPA/EDN1/KHSRP/SOD2/HSP90AB1/CLU/MMP8/AKT1/CLEC7A/PTK2B/TSPO/GCH1/MIR181B1/CX3CR1/IL1B/KLF2/CYB5B/NQO1/ROCK2/IL10/TMEM106A/TLR6/CD34/PTX3/KLF4/PTGS2/TLR4/INSR/SMAD3/CD47/CD36/TLR2/ASS1/CAV1	43
BP	GO:0050869	negative regulation of B cell activation	24/5019	36/18903	5.44721858145825e-07	1.41010184655239e-05	1.02931886597852e-05	BLK/THOC1/ID2/CR1/CTLA4/BCL6/TBC1D10C/LYN/FCGR2B/TYROBP/TNFAIP3/IL10/CASP3/MNDA/CD300A/RC3H1/LAPTM5/BANK1/ATM/PTEN/HMGB3/TNFRSF21/SAMSN1/INHBA	24
BP	GO:0070670	response to interleukin-4	24/5019	36/18903	5.44721858145825e-07	1.41010184655239e-05	1.02931886597852e-05	TCF7/IL4R/RPLP0/GATA3/CDK4/XCL1/IMPDH2/XBP1/LEF1/KEAP1/STAT5B/HSP90AB1/FASN/ARG1/CD300LF/JAK3/STAT6/TUBA1B/IL2RG/MCM2/CORO1A/ALAD/NFIL3/HSPA5	24
BP	GO:0042102	positive regulation of T cell proliferation	52/5019	106/18903	5.83469086692402e-07	1.5043150565771e-05	1.09809080237441e-05	CD6/IL23A/CD28/TNFRSF13C/CD40LG/CD3E/XCL1/IL6/IL1A/CD274/SLAMF1/HES1/RPS3/BMI1/LILRB2/CARD11/SASH3/CD55/TGFBR2/ZAP70/IL15/STAT5B/IL18/DHPS/GPAM/PDCD1LG2/TYK2/HMGB1/IL1B/CCL5/NCK2/IL6ST/HLA-E/SLC7A1/JAK3/PTPRC/CCR2/HLA-A/CD1D/CD24/IL12RB1/HAVCR2/CD86/CORO1A/SYK/TFRC/IGFBP2/IL27RA/LGALS9/TNFSF13B/TMIGD2/PTPN22	52
BP	GO:0050868	negative regulation of T cell activation	60/5019	128/18903	6.05460199725499e-07	1.55474398274893e-05	1.1349019342984e-05	ADORA2A/IL4R/SOCS6/XCL1/HFE/CD274/GLMN/LILRB1/CRTAM/ZC3H12A/TNFRSF14/PDE5A/LILRB2/TBX21/SMAD7/BTN2A2/IRF1/CEACAM1/TWSG1/LILRB4/CR1/CTLA4/RUNX3/BCL6/SPN/ZC3H8/SOCS5/CBFB/PAG1/PDCD1LG2/FCGR2B/ARG1/ZBTB7B/HMGB1/DLG1/PRKAR1A/LGALS3/JAK3/LGALS9C/IL10/CASP3/CD300A/RC3H1/LAPTM5/LGALS9B/PELI1/HAVCR2/CD86/FGL2/CBLB/PTEN/TARM1/TNFRSF21/HLX/LGALS9/PRNP/PTPN6/DUSP22/PTPN22/MIR27A	60
BP	GO:0002820	negative regulation of adaptive immune response	35/5019	62/18903	6.0985410734663e-07	1.55976286494974e-05	1.13856552083156e-05	CR2/IL4R/XCL1/IL7R/HFE/SLAMF1/CD160/LILRB1/KLRD1/ZC3H12A/THOC1/TNFRSF14/TBX21/SMAD7/KLRC1/CR1L/CEACAM1/CD55/NOD2/LILRB4/CR1/BCL6/FCGR2B/ARG1/ZBTB7B/HLA-F/JAK3/PTPRC/RC3H1/HAVCR2/SAMSN1/IL27RA/PTPN6/DUSP22/IL1RL1	35
BP	GO:0009124	nucleoside monophosphate biosynthetic process	27/5019	43/18903	6.51080730447531e-07	1.65856979700459e-05	1.21069069356442e-05	UPP1/UCK2/PAICS/IMPDH2/GMPS/ATIC/CDA/PPAT/UMPS/DCTD/GART/PFAS/APRT/HPRT1/PRPS2/ADSL/DHODH/IMPDH1/AMPD3/AMPD2/DUT/CMPK1/ADA/TYMS/CAD/DCK/ADK	27
BP	GO:0042176	regulation of protein catabolic process	138/5019	361/18903	6.57894405243875e-07	1.66927651870212e-05	1.2185061791359e-05	DNAJB2/ZFAND2A/N4BP1/XPO1/EGLN2/DEDD/NRG1/AXIN2/IFNG/TRIM39/SUMO2/RPL11/GSK3A/HFE/UBE2K/SMARCC1/GLMN/TAF9/PSMD14/ARAF/FAF1/TNF/UBXN2A/KEAP1/SMAD7/PLK3/FBXO22/PRKACA/RNF185/TNFRSF1B/HECTD1/RNF19B/OAZ2/EIF3H/ADAM8/HSPA1A/COMMD1/UCHL5/F8A2/HSPA1B/LPCAT1/FOXO1/LDLR/VCP/CSNK1D/HSP90AB1/LRRK2/CLU/TNFSF12/HERPUD1/GABARAP/ATXN3/AMER1/FBXL5/RNF144B/PSMC3/PIAS1/SOCS5/PINK1/AKT1/CSNK2A1/USP14/PKD1/RELA/CHMP…	138
BP	GO:0070227	lymphocyte apoptotic process	42/5019	80/18903	7.00315883269278e-07	1.76988923226236e-05	1.29194950131724e-05	BLK/BCL11B/IL7R/CD27/CD274/RPS6/SLC46A2/CD3G/BCL3/PRKD2/DFFA/SLC39A10/BCL2L11/ADAM8/FASLG/BCL10/BCL6/MIF/ZC3H8/GIMAP8/AKT1/GPAM/LYN/ADA/CCL5/RIPK3/LGALS3/LMBR1L/JAK3/IL10/KIFAP3/HIF1A/TRAF3IP2/FAS/PRELID1/PTEN/TNFRSF21/DOCK8/LGALS9/P2RX7/TP53/IRS2	42
BP	GO:0042100	B cell proliferation	51/5019	104/18903	7.57113934950865e-07	1.90590019688025e-05	1.39123215398762e-05	BLK/CD22/CR2/MS4A1/FCRL3/TNFRSF13C/CD79A/CD40/CD40LG/IL7R/RASGRP1/IKZF3/BMI1/LEF1/CARD11/SASH3/SLC39A10/CTPS1/ABL1/PRKCD/CTLA4/BCL6/MIF/PLCL2/LYN/FCGR2B/CD38/CD19/ADA/TYROBP/BST1/PTPRC/IL10/CASP3/MNDA/CD300A/RC3H1/ATAD5/TLR4/PELI1/ATM/CDKN1A/TFRC/PTEN/TNFRSF21/GPR183/TNFSF13B/IRS2/VAV3/GAPT/NFATC2	51
BP	GO:0002474	antigen processing and presentation of peptide antigen via MHC class I	21/5019	30/18903	8.19058508799777e-07	2.05374906088854e-05	1.49915600743786e-05	TAPBP/HFE/CALR/CLEC4A/TAP1/FCER1G/MR1/TAP2/HLA-E/HLA-F/IFI30/HLA-A/HLA-B/HLA-C/FCGR1A/IDE/HLA-H/TAPBPL/ERAP1/MFSD6/PDIA3	21
BP	GO:2001057	reactive nitrogen species metabolic process	43/5019	83/18903	8.34264363533974e-07	2.07677454794299e-05	1.51596370702455e-05	IFNG/POR/DNM2/CYP1B1/PKD2/ZC3H12A/TNF/RORA/CYB5R3/SIRPA/EDN1/KHSRP/SOD2/HSP90AB1/CLU/MMP8/AKT1/CLEC7A/PTK2B/TSPO/GCH1/MIR181B1/CX3CR1/IL1B/KLF2/CYB5B/NQO1/ROCK2/IL10/TMEM106A/TLR6/CD34/PTX3/KLF4/PTGS2/TLR4/INSR/SMAD3/CD47/CD36/TLR2/ASS1/CAV1	43
BP	GO:0006417	regulation of translation	177/5019	486/18903	8.34737345669921e-07	2.07677454794299e-05	1.51596370702455e-05	CAPRIN1/EIF3E/C1QBP/NPM1/BZW2/ZFP36L1/DDX1/CD28/RPL26/ABCE1/LRPPRC/PAIP1/RPL22/EIF2AK4/NCL/SYNCRIP/EIF3D/METAP1/SESN2/IL6/POLR2D/CYP1B1/CALR/FASTKD2/METTL5/EIF3B/EEF2/PCIF1/MAPKAPK5/PRKDC/RARA/EXOSC2/ZC3H12A/PATL1/MRPS27/FXR1/DIS3/PA2G4/PPP1R15A/LARP4/RPS3/METTL8/NAT10/NCBP2/PUS7/TNF/BCL3/PNPT1/PARN/EXOSC8/IGF2BP2/EIF2A/NCBP1/EIF3C/PATL2/TRUB2/LARP1B/YTHDF2/TNRC6C/CNOT7/EIF4B/GUF1/IMPACT/ELP4/RPL…	177
BP	GO:1902115	regulation of organelle assembly	87/5019	207/18903	9.00931136274314e-07	2.23277274625502e-05	1.62983625387201e-05	NPM1/DRG1/MPHOSPH9/G3BP1/WDR45/DNM2/CHMP7/PIP4K2C/KAT2A/SNX18/ABI3/TNF/WIPI1/LIMK2/SDCCAG8/VDAC3/SYNE2/CHMP2A/PATL2/CENPJ/MNS1/IFT140/WDPCP/MTMR3/CHMP1A/HSPA1A/CEP76/MAK/HSPA1B/ODF2/CHMP4B/PIP4K2B/ALMS1/ASAP1/SPICE1/LRRK2/HCK/PAN3/LRFN4/PINK1/SMCR8/GDI2/PIKFYVE/DYNC2LI1/TBC1D7/CHMP6/CDKL5/CHMP3/ATG2A/CNOT2/RNF5/RALB/FSCN1/ULK1/CCDC88A/ARHGAP35/SNX4/ODF2L/MSN/PLK2/STYXL1/GPSM2/C9orf72/SDCBP/LCP1/S…	87
BP	GO:0007033	vacuole organization	89/5019	213/18903	9.17392646578432e-07	2.26461075899541e-05	1.65307675047095e-05	ATP6V0C/EXT1/BAG3/MFN2/WDR45/CHMP7/AKTIP/PIP4K2C/GNPTAB/SNX18/WIPI1/UBXN2A/CHMP2A/ATG9A/TFEB/RAB19/MTMR3/TOM1/CHMP1A/ULK3/CHMP4B/PIP4K2B/LRRK2/TMEM175/GABARAP/ATP6V0B/MAP1LC3B/PINK1/GABARAPL1/GRN/SMCR8/RAB20/HOOK1/PIKFYVE/ATG16L1/CHMP6/MAP1LC3B2/TPP1/CHMP3/ATG2A/RNF5/TCIRG1/ZKSCAN3/RALB/RNASEK/ATP6V0A1/ULK1/SNX4/ACP2/C9orf72/CTSD/GABARAPL2/MBTPS1/PPT1/VPS18/IFT88/LRBA/RAB1B/UBXN2B/PIP4K2A/CHMP2B/…	89
BP	GO:0043122	regulation of I-kappaB kinase/NF-kappaB signaling	103/5019	255/18903	9.23563313063328e-07	2.26461075899541e-05	1.65307675047095e-05	TRAF1/CCR7/SHISA5/NFKBIB/DDX1/MYD88/TNIP1/CD40/TRIM39/SLC44A2/IL1A/WLS/MAP3K14/RBCK1/LITAF/ZC3H12A/ATP2C1/CLEC6A/TNF/SECTM1/HMOX1/NR1D1/CARD11/RORA/NLRP12/ZMYND11/MAP3K3/DHX15/GSTP1/PPP5C/NOD2/CLEC4D/ABL1/LILRB4/TIFA/BIRC3/FASLG/S100A12/ANKRD17/CARD16/BCL10/APOL3/USP10/PINK1/CLEC7A/CANT1/RELA/PIM2/CFLAR/FYN/LTF/PPM1N/TRAF3/S100A4/TRIM21/CD4/IL1B/ANGPT1/TNFSF10/SUMO4/PLK2/FKBP1A/MAVS/RIOK3/CASP1/N…	103
BP	GO:0009168	purine ribonucleoside monophosphate biosynthetic process	16/5019	20/18903	9.24403203155776e-07	2.26461075899541e-05	1.65307675047095e-05	PAICS/IMPDH2/GMPS/ATIC/PPAT/GART/PFAS/APRT/HPRT1/PRPS2/ADSL/IMPDH1/AMPD3/AMPD2/ADA/ADK	16
BP	GO:1900180	regulation of protein localization to nucleus	62/5019	135/18903	9.57238299418865e-07	2.33609988033749e-05	1.70526099623272e-05	NPM1/BAG3/CCT2/IPO5/IFNG/RAN/CCT6A/CCT4/CCT8/SESN2/CCT7/CCT3/RASSF5/ZC3H12A/DKC1/LIMK2/POLR1A/NMD3/NF2/HCLS1/LILRB4/PRKCD/PARP1/HSP90AB1/NVL/CCT5/NUP54/TARDBP/AKT1/EIF2AK3/FYN/NOLC1/BYSL/MAPK14/ANGPT1/EFCAB7/SUMO4/PARP9/UFM1/LATS2/MAVS/TRIM28/JUP/CDK5RAP3/TRIM8/CHP1/PTGS2/CD2AP/PSEN1/SMAD3/PIK3R1/CTNNA1/TGFB1/PYHIN1/TFRC/CACNB4/LMNA/NF1/CD36/MAGED1/GLUL/FERMT1	62
BP	GO:0030183	B cell differentiation	68/5019	152/18903	9.62743314684139e-07	2.34060104718265e-05	1.70854667092634e-05	FLT3/CR2/MS4A1/ZFP36L1/FCRL3/CD79A/CD40LG/PAX5/KIT/IL6/CD27/IKZF3/PRKDC/POU2AF1/XBP1/MSH2/TOP2B/BCL3/SLAMF8/PIK3CD/CARD11/PHF14/ID2/SLC25A5/SPI1/ABL1/STAT5B/CR1/LFNG/BCL6/PTK2B/PLCL2/ITGA4/FCGR2B/CD19/ADA/TCF3/TCIRG1/NFAM1/LYL1/PTPRJ/PCID2/JAK3/PTPRC/IL10/PLCG2/HHEX/NOTCH2/TRAF3IP2/DCLRE1C/IL2RG/ITM2A/MALT1/ZFP36L2/BLNK/PIK3R1/ATM/SYK/HMGB3/NKX2-3/CD79B/GPR183/EZH2/TP53/IRF8/PTPN6/TNFSF13B/INHBA	68
BP	GO:0009127	purine nucleoside monophosphate biosynthetic process	17/5019	22/18903	9.94737923937684e-07	2.40922510820362e-05	1.75863953538265e-05	PAICS/IMPDH2/GMPS/ATIC/PPAT/GART/PFAS/APRT/HPRT1/PRPS2/ADSL/IMPDH1/AMPD3/AMPD2/ADA/DCK/ADK	17
BP	GO:0042093	T-helper cell differentiation	37/5019	68/18903	1.01001216984989e-06	2.43698785434723e-05	1.77890524771178e-05	MYB/IL4R/IL23A/GATA3/NFKBID/IL6/SEMA4A/RARA/JUNB/ZC3H12A/LY9/BCL3/LEF1/IRF4/TBX21/RORA/SMAD7/BCL6/IL18/SPN/SLAMF6/SOCS5/IL18R1/BATF/ZBTB7B/HMGB1/NFKBIZ/NLRP3/JAK3/STAT3/RC3H1/STAT6/MALT1/IL12RB1/CD86/GPR183/HLX	37
BP	GO:0002335	mature B cell differentiation	24/5019	37/18903	1.15929939358115e-06	2.77792492124937e-05	2.02777589200726e-05	IL6/POU2AF1/XBP1/BCL3/SLAMF8/PHF14/SPI1/CR1/LFNG/BCL6/PTK2B/PLCL2/FCGR2B/CD19/ADA/IL10/PLCG2/NOTCH2/IL2RG/ITM2A/MALT1/NKX2-3/GPR183/IRF8	24
BP	GO:0042542	response to hydrogen peroxide	60/5019	130/18903	1.16000305594868e-06	2.77792492124937e-05	2.02777589200726e-05	MAPK13/APEX1/IL6/CYP1B1/HDAC2/UBE3A/MAPK7/RPS3/PLEKHA1/HMOX1/IMPACT/SIRPA/EDN1/ERN1/HP/IL18BP/KDM6B/ABL1/AIFM1/PRKCD/SOD2/STK24/LRRK2/FXN/PPIF/ANKZF1/PINK1/SLC8A1/PTK2B/RELA/FYN/TXN/ARG1/ADAM9/TXNIP/NET1/FOXO3/RIPK3/CAT/OSER1/RHOB/KLF2/PPP1R15B/NQO1/TNFAIP3/IL10/CASP3/BNIP3/PRDX3/ZNF277/STAT6/PRKAA1/PCNA/MMP2/HGF/SOD1/EZH2/CAPN2/NR4A3/MAP3K5	60
BP	GO:0002715	regulation of natural killer cell mediated immunity	30/5019	51/18903	1.17500959422075e-06	2.79710862994334e-05	2.04177924454979e-05	NCR3/KIR2DL4/SH2D1B/RASGRP1/VAV1/NCR1/CD160/LILRB1/CRTAM/KLRD1/KLRC1/SERPINB9/KLRB1/CEACAM1/KLRC4/CD226/STAT5B/KLRC2/SLAMF6/KLRC3/ARRB2/AP1G1/HLA-E/HLA-F/PIK3R6/HLA-A/HLA-B/HAVCR2/CLEC12B/LGALS9	30
BP	GO:0006809	nitric oxide biosynthetic process	40/5019	76/18903	1.17676293627582e-06	2.79710862994334e-05	2.04177924454979e-05	IFNG/DNM2/CYP1B1/PKD2/ZC3H12A/TNF/RORA/CYB5R3/SIRPA/EDN1/KHSRP/SOD2/HSP90AB1/CLU/MMP8/AKT1/CLEC7A/PTK2B/TSPO/GCH1/MIR181B1/CX3CR1/IL1B/KLF2/CYB5B/NQO1/ROCK2/IL10/TLR6/CD34/PTX3/KLF4/PTGS2/TLR4/INSR/SMAD3/CD47/CD36/ASS1/CAV1	40
BP	GO:0046777	protein autophosphorylation	93/5019	226/18903	1.18153694517497e-06	2.79805452868472e-05	2.04246971341357e-05	FLT3/LCK/EIF2AK4/EPHA4/KIT/MINK1/CAMK4/MAPKAPK5/LMTK2/STK10/FGR/EEF2K/TRIM24/PIM3/MAPK3/GRK5/PRKD2/NLRP12/PRKACA/MVP/MAP3K3/IMPACT/ZAP70/ERN1/TRPM7/ULK3/EPHB1/MAK/ABL1/CLK3/EIF2S1/STK24/LRRK2/DAPK2/HCK/MAP3K11/RAD50/PINK1/AKT1/PTK2B/EIF2AK3/PIKFYVE/PIM2/STK4/LYN/FYN/MKNK2/CDKL5/BMX/CSK/FER/ATR/CALM3/CLK1/OXSR1/CAD/ULK1/CAMK2D/PPP2R5B/RIPK3/CALM1/TRIM28/RIOK2/MEX3B/MKNK1/PTPRC/RASSF2/VEGFA/CHP1/RA…	93
BP	GO:0061077	chaperone-mediated protein folding	38/5019	71/18903	1.25382705113614e-06	2.94741550182518e-05	2.1514973470347e-05	DNAJB2/HSPA6/ST13/CCT2/DNAJB1/HSPA1L/CCT6A/CCT4/CCT8/HSPA7/CCT7/CCT3/TOR2A/PDCL3/HSPA2/DFFA/HSPA1A/HSPA1B/PDCD5/DNAJC5/CLU/CCT5/CSNK2A1/PTGES3/TOR1B/SDF2/FKBP1A/DNAJB12/HSPB1/HSPA13/PDIA4/PPIB/HSPE1/TOR1A/CRTAP/HSPH1/CHORDC1/HSPA5	38
BP	GO:2000379	positive regulation of reactive oxygen species metabolic process	38/5019	71/18903	1.25382705113614e-06	2.94741550182518e-05	2.1514973470347e-05	CD177/FPR2/CYP1B1/ZC3H12A/ITGB2/TGFBR2/GRB2/GSTP1/PRKCD/SOD2/ITGAM/MMP8/GNAI2/CLEC7A/PTK2B/TSPO/MAPK14/TYROBP/FOXO3/DCXR/RIPK3/HVCN1/AKR1C3/PLCG2/TLR6/TLR4/F2RL1/GNAI3/GADD45A/TGFB1/CDKN1A/SYK/THBS1/CYBA/CD36/CLCN3/SOD1/TP53	38
BP	GO:0050766	positive regulation of phagocytosis	39/5019	74/18903	1.52555234654692e-06	3.57303359114321e-05	2.60817393660653e-05	SIRPG/FPR2/IL2RB/IFNG/SLC11A1/DNM2/CALR/TNF/SIRPB1/SIRPA/IL15/NOD2/FCN1/CLEC7A/ABCA7/FCGR2B/FCER1G/CFP/FCN2/PTPRJ/CD300LF/IL1B/RAB31/BCR/GATA2/PTPRC/PLCG2/PTX3/MFGE8/IL2RG/F2RL1/FCGR1A/MIR20A/CD47/CYBA/CD36/SOD1/AZU1/STAP1	39
BP	GO:0034599	cellular response to oxidative stress	113/5019	288/18903	1.54377337992647e-06	3.60251350045615e-05	2.62969311048558e-05	MAPK13/RBM11/PXN/SESN2/APEX1/IL6/CYP1B1/PKD2/PPIA/HDAC2/ZC3H12A/MAPK7/RPS3/PLEKHA1/TNF/MMP9/MAPK3/HMOX1/PNPT1/KEAP1/LANCL1/ALOX5/PRKRA/ERMP1/G6PD/IMPACT/SIRPA/EDN1/ERN1/HSPA1A/IL18BP/TBC1D24/KDM6B/HSPA1B/ABL1/FOXO1/AIFM1/CHD6/EIF2S1/PRKCD/SOD2/PARP1/STK24/LRRK2/FXN/PPIF/REST/ANKZF1/PINK1/AKT1/RELA/MGST1/PNPLA8/GCH1/FYN/SFPQ/TXN/FER/ARG1/MAPK8/NCF1/NET1/MAPK1/FOXO3/VKORC1L1/SUMO4/RIPK3/FBXW7/ABCC1…	113
BP	GO:0071103	DNA conformation change	51/5019	106/18903	1.56832261350658e-06	3.64649265118584e-05	2.66179616011031e-05	CHD1L/DDX1/G3BP1/SMARCAD1/CHD9/TOP2B/BLM/ZRANB3/POT1/RFC3/FANCM/SSBP1/WRNIP1/ASCC3/UPF1/WRN/ABL1/RUVBL1/CHD6/MCM3/DHX9/MCM4/RAD50/TOP3A/XRCC6/MCM6/DSCC1/TOP1MT/HMGB1/GINS2/RFC4/GINS1/RFC5/MCM7/CHD4/XRCC5/MNAT1/GTF2H2/CHD2/HHEX/BRIP1/DDX11/DDX12P/CDC45/MCM2/RUVBL2/RPA1/HMGB3/MCM5/CHD7/TOP2A	51
BP	GO:0002218	activation of innate immune response	35/5019	64/18903	1.68196845264297e-06	3.89656024862289e-05	2.84433566705528e-05	FFAR2/ZBP1/MATR3/KIR2DS2/PRKDC/KLRD1/CLEC6A/ZNFX1/NLRC4/CASP6/LILRA2/KLRC4/FCN1/KLRC2/HCK/KLRC3/XRCC6/CLEC7A/LYN/FYN/SFPQ/HMGB1/FCN2/TYROBP/CREBBP/HEXIM1/MAVS/XRCC5/AIM2/PLCG2/MNDA/TLR4/PAK1/SYK/PYHIN1	35
BP	GO:0046822	regulation of nucleocytoplasmic transport	52/5019	109/18903	1.71977886724274e-06	3.9697711469856e-05	2.89777674229691e-05	XPO1/BAG3/IPO5/IFNG/RAN/SIRT7/XPO4/ZC3H12A/PTPN11/NCBP2/CTDSPL2/PRKACA/HCLS1/MDN1/KHDRBS1/PRKCD/MX2/HSP90AB1/DHX9/NSUN2/NUP54/TARDBP/TCF7L2/NOLC1/TXN/THOC2/MAPK14/IL1B/ANGPT1/EFCAB7/ANP32B/UFM1/CPSF6/MAVS/SP100/TRIM28/RIOK2/FRAT1/YWHAE/JUP/CHP1/IWS1/PTGS2/PSEN1/SMAD3/PIK3R1/PTPN14/TGFB1/NF1/CD36/NEDD4/FERMT1	52
BP	GO:0034976	response to endoplasmic reticulum stress	104/5019	261/18903	1.7326103526515e-06	3.98500381109845e-05	2.90889598775341e-05	DNAJB2/RASGRF2/TMX1/GRINA/EIF2AK4/SESN2/CALR/TMUB2/NR1H2/XBP1/ERP27/PPP1R15A/STT3B/SGTB/FAF1/UBE2G2/UBA5/ERLIN1/RHBDD2/MBTPS2/ALOX5/ERMP1/RNF185/BCL2L11/ERN1/FLOT1/HSP90B1/HSPA1A/CREB3/NRBF2/TMTC4/ABL1/UFC1/AIFM1/EIF2S1/CREB3L4/VCP/LRRK2/CLU/RCN3/HERPUD1/ERLEC1/ATXN3/ANKZF1/CANX/USP14/EIF2AK3/DNAJC10/ABCA7/PTPN1/PDIA6/FCGR2B/RNF5/TMED2/MARCKS/TMEM67/FAM8A1/OPA1/UBXN8/ITPR1/NCK2/USP13/UFM1/TMTC3/A…	104
BP	GO:0071900	regulation of protein serine/threonine kinase activity	147/5019	395/18903	1.75645604987058e-06	4.02536916948836e-05	2.93836111115871e-05	FLT3/FAM20A/TCL1A/IPO7/DUSP16/IPO5/INPP5K/CD40/SERTAD1/CD40LG/IFNG/EPHA4/CCNJL/SESN2/KIT/RASGRP1/PKD2/SMPD1/CCNK/RPS3/BLM/PDE5A/CCNG1/TNF/GTPBP4/PIK3R5/HEG1/EDN1/ZNF675/ERN1/MAP2K6/GSTP1/ETAA1/ADAM8/BCCIP/RGS14/NOD2/ABL1/CCND3/MLST8/PRKCD/S100A12/DAZAP2/TFAP4/HSP90AB1/DUSP1/LRRK2/CNPPD1/RGS2/MIF/LRP5/MAP3K11/MAP2K5/CCNJ/SLC8A1/AKT1/PTK2B/PKD1/SASH1/SPDYE3/STK4/PTPN1/LYN/LTF/CSK/PAQR3/ADAM9/ALS2/R…	147
BP	GO:0002224	toll-like receptor signaling pathway	57/5019	123/18903	1.80997796016212e-06	4.1332139561702e-05	3.01708356216497e-05	LILRA4/FCRL3/MYD88/TNIP1/CD40/SLC15A4/APPL1/TLR10/OTUD4/IRAK2/GPR108/TNF/NR1D1/IRF4/NINJ1/IRF1/LY96/TLR5/TLR1/FLOT1/TLR8/NOD2/LILRA2/CD14/BIRC3/BCL10/ARRB2/LYN/LTF/TRAF3/HMGB1/GRAMD4/CD300LF/SCIMP/OAS1/IFI35/PIK3AP1/NFKBIA/UNC93B1/CTSS/TNFAIP3/PLCG2/CD300A/SMPDL3B/IRAK4/TLR6/GFI1/TLR7/TLR4/F2RL1/PELI1/HAVCR2/CYBA/CD36/TLR2/PTPN22/CAV1	57
BP	GO:0032729	positive regulation of interferon-gamma production	40/5019	77/18903	1.82354553587786e-06	4.14857930294262e-05	3.0282996607424e-05	IL23A/SLC11A1/CD3E/RASGRP1/SLAMF1/CD2/CD160/LILRB1/CRTAM/TNF/BCL3/SASH3/BTN3A1/TLR8/ABL1/CD14/CD226/IL18/SLAMF6/CLEC7A/IL18R1/BTN3A2/TYK2/IL1B/IL1R1/CCR2/HLA-A/TLR7/TLR4/F2RL1/IL12RB1/HAVCR2/ARID5A/TXK/CD244/IL27RA/LGALS9/PDE4B/IRF8/PTPN22	40
BP	GO:0000302	response to reactive oxygen species	85/5019	204/18903	1.82968308324964e-06	4.14857930294262e-05	3.0282996607424e-05	MAPK13/PXN/SESN2/APEX1/IL6/IL1A/CYP1B1/PKD2/HDAC2/UBE3A/MAPK7/RPS3/PLEKHA1/MMP9/MAPK3/HMOX1/PLK3/IMPACT/SIRPA/EDN1/ERN1/GSTP1/HP/IL18BP/KDM6B/ABL1/AIFM1/PRKCD/SOD2/STK24/LRRK2/FXN/PPIF/ANKZF1/PINK1/SLC8A1/AKT1/PTK2B/RELA/GCH1/FYN/TXN/FER/ARG1/ADAM9/MAPK8/TXNIP/NCF1/NET1/MAPK1/FOXO3/RIPK3/CAT/OSER1/RHOB/KLF2/PPP1R15B/AKR1C3/NQO1/TNFAIP3/IL10/UCP2/CASP3/BNIP3/HIF1A/PRDX3/NME8/ZNF277/PRDX1/STAT6/FOS…	85
BP	GO:0031396	regulation of protein ubiquitination	87/5019	210/18903	1.84930549821487e-06	4.17825418925297e-05	3.04996116015799e-05	DNAJB2/N4BP1/NPM1/SIRT7/KDM1A/RPL11/GSK3A/GLMN/PPIA/RASSF5/RPS20/UBE3A/RPS3/BMI1/UBXN2A/MTA1/GTPBP4/RPS7/SMAD7/FANCM/DCUN1D5/RPS2/UBE2V2/RNF111/HUWE1/DCUN1D4/HSPA1A/COMMD1/NOD2/HDAC8/HSPA1B/ABL1/BIRC3/PRMT3/BCL10/HSP90AB1/LRRK2/MTBP/SOX4/RPL37/HERPUD1/GABARAP/AMER1/ARRB2/PINK1/AKT1/UBE2D1/ARRB1/TSPO/SASH1/TBC1D7/FYN/SKP2/MYCBP2/CDC14B/ANGPT1/USP4/FBXW7/MAD2L1/FKBP1A/SPRY2/DERL1/OGT/TOPORS/FBXO33/…	87
BP	GO:1902622	regulation of neutrophil migration	28/5019	47/18903	1.87013206998613e-06	4.20618705967735e-05	3.07035105651834e-05	CCR7/C1QBP/IL23A/MYD88/XCL1/C5AR2/IL1A/CXCR2/SLAMF8/RAC2/EDN1/DPP4/ADAM8/NOD2/C5AR1/RHOG/CD99/DNM1L/DAPK2/TNFAIP6/BST1/IL1R1/MCU/MOSPD2/FUT7/RHOH/MPP1/JAM3	28
BP	GO:0050657	nucleic acid transport	71/5019	163/18903	1.8814036582229e-06	4.20618705967735e-05	3.07035105651834e-05	XPO1/NPM1/ZFP36L1/LRPPRC/SEH1L/RAN/HNRNPA1L2/HNRNPA1/POLR2D/TOMM20/THOC1/XPOT/NUP133/NCBP2/NUP107/CKAP5/PNPT1/XPO5/NDC1/FYTTD1/IGF2BP2/NXF1/NCBP1/SSB/NUP43/MVP/TGFBR2/YBX1/NUP160/NPIPA1/MAGOHB/THOC7/FLOT1/KHSRP/UPF1/EIF4A3/KHDRBS1/ZFP36/MX2/NUTF2/DHX9/SIDT2/RBM15B/SIDT1/NSUN2/PHAX/NUP35/CETN3/NUP54/CASC3/UPF3A/NUP155/NUP37/THOC2/NUP205/NUP188/CPSF6/UPF2/PCID2/SRSF1/AGFG1/HHEX/KPNB1/RBM8A/TNKS/IWS…	71
BP	GO:0050658	RNA transport	71/5019	163/18903	1.8814036582229e-06	4.20618705967735e-05	3.07035105651834e-05	XPO1/NPM1/ZFP36L1/LRPPRC/SEH1L/RAN/HNRNPA1L2/HNRNPA1/POLR2D/TOMM20/THOC1/XPOT/NUP133/NCBP2/NUP107/CKAP5/PNPT1/XPO5/NDC1/FYTTD1/IGF2BP2/NXF1/NCBP1/SSB/NUP43/MVP/TGFBR2/YBX1/NUP160/NPIPA1/MAGOHB/THOC7/FLOT1/KHSRP/UPF1/EIF4A3/KHDRBS1/ZFP36/MX2/NUTF2/DHX9/SIDT2/RBM15B/SIDT1/NSUN2/PHAX/NUP35/CETN3/NUP54/CASC3/UPF3A/NUP155/NUP37/THOC2/NUP205/NUP188/CPSF6/UPF2/PCID2/SRSF1/AGFG1/HHEX/KPNB1/RBM8A/TNKS/IWS…	71
BP	GO:2000106	regulation of leukocyte apoptotic process	46/5019	93/18903	1.91495078935757e-06	4.26355203590368e-05	3.11222523207562e-05	CCR7/BLK/BCL11B/IL7R/CD27/CD274/MIAT/LILRB1/SLC46A2/CXCR2/CD3G/BCL3/PIK3CD/PRKD2/SLC39A10/BCL2L11/ADAM8/NOD2/HCLS1/ST6GAL1/BCL10/BCL6/MIF/ZC3H8/GIMAP8/HCAR2/GPAM/ITPKB/LYN/ADA/CCL5/RIPK3/LGALS3/JAK3/IL10/KIFAP3/HIF1A/PRELID1/BCL2L1/PTEN/NF1/DOCK8/LGALS9/P2RX7/TP53/IRS2	46
BP	GO:0002183	cytoplasmic translational initiation	25/5019	40/18903	1.9203987900223e-06	4.26355203590368e-05	3.11222523207562e-05	EIF3E/EIF3M/EIF3D/EIF3J/EIF3B/EIF2D/NCBP2/EIF3L/EIF3CL/NCBP1/EIF3C/DENR/YTHDF2/EIF4B/EIF3H/EIF3I/EIF4A1/EIF2B3/EIF2S2/EIF2S3/METTL3/EIF3A/EIF3K/EIF3F/EIF3G	25
BP	GO:0045576	mast cell activation	36/5019	67/18903	2.09948925098896e-06	4.64502915945447e-05	3.3906885226316e-05	BLK/IL4R/KIT/RASGRP1/STXBP2/VAMP8/FGR/HMOX1/PIK3CD/RAC2/PTGDR/LCP2/LAT/CD226/S100A12/RABGEF1/LYN/FER/CD300LF/C12orf4/PLSCR1/SNX4/GATA2/CD300A/RAB44/CRLF2/RHOH/SYK/CBL/SNAP23/PIK3CG/UNC13D/LGALS9/MILR1/PTPN6/NR4A3	36
BP	GO:0002823	negative regulation of adaptive immune response based on somatic recombination of immune receptors built from immunoglobulin superfamily domains	32/5019	57/18903	2.16760348242999e-06	4.75110020079162e-05	3.46811620932618e-05	CR2/IL4R/XCL1/IL7R/HFE/SLAMF1/LILRB1/KLRD1/ZC3H12A/THOC1/TBX21/SMAD7/KLRC1/CR1L/CEACAM1/CD55/NOD2/LILRB4/CR1/BCL6/FCGR2B/ARG1/ZBTB7B/HLA-F/JAK3/PTPRC/RC3H1/HAVCR2/IL27RA/PTPN6/DUSP22/IL1RL1	32
BP	GO:0045428	regulation of nitric oxide biosynthetic process	34/5019	62/18903	2.16972358246974e-06	4.75110020079162e-05	3.46811620932618e-05	IFNG/DNM2/PKD2/ZC3H12A/TNF/SIRPA/EDN1/KHSRP/SOD2/HSP90AB1/CLU/MMP8/AKT1/CLEC7A/PTK2B/TSPO/MIR181B1/CX3CR1/IL1B/KLF2/ROCK2/IL10/TLR6/CD34/PTX3/KLF4/PTGS2/TLR4/INSR/SMAD3/CD47/CD36/ASS1/CAV1	34
BP	GO:0070228	regulation of lymphocyte apoptotic process	34/5019	62/18903	2.16972358246974e-06	4.75110020079162e-05	3.46811620932618e-05	BLK/BCL11B/IL7R/CD27/CD274/SLC46A2/CD3G/BCL3/PRKD2/SLC39A10/BCL2L11/ADAM8/BCL10/BCL6/MIF/ZC3H8/GIMAP8/GPAM/LYN/ADA/CCL5/RIPK3/LGALS3/JAK3/IL10/KIFAP3/HIF1A/PRELID1/PTEN/DOCK8/LGALS9/P2RX7/TP53/IRS2	34
BP	GO:0015931	nucleobase-containing compound transport	91/5019	223/18903	2.3356334163034e-06	5.09694200131193e-05	3.72056711618081e-05	XPO1/NPM1/ZFP36L1/LRPPRC/SEH1L/RAN/HNRNPA1L2/HNRNPA1/POLR2D/TOMM20/THOC1/XPOT/NUP133/NCBP2/SLC35A4/NUP107/CKAP5/PNPT1/XPO5/NDC1/FYTTD1/IGF2BP2/NXF1/NCBP1/SSB/NUP43/SLC25A5/MVP/TGFBR2/YBX1/NUP160/NPIPA1/MAGOHB/THOC7/FLOT1/SLC25A32/KHSRP/UPF1/EIF4A3/SLC17A9/KHDRBS1/ZFP36/SLC25A36/MX2/NUTF2/CR1/DHX9/SIDT2/RBM15B/SIDT1/SLC35B4/NSUN2/PHAX/NUP35/CETN3/NUP54/CASC3/UPF3A/NUP155/SLC25A17/SLC35A3/NUP37/THO…	91
BP	GO:0042326	negative regulation of phosphorylation	142/5019	381/18903	2.38166166405584e-06	5.17970907482077e-05	3.78098382328092e-05	ADORA2A/IPO7/NPM1/DUSP16/IPO5/INPP5K/IFNG/IBTK/PRKDC/PPIA/PIP4K2C/SNX25/SMPD1/PIK3IP1/ZC3H12A/PIBF1/PWP1/SH3BP5/SMAD7/NLRP12/SH3BP5L/HEG1/GADD45B/SMYD3/MVP/CEACAM1/IMPACT/SIRPA/ZNF675/SEMA4D/GSTP1/SOCS3/NF2/RGS14/YWHAG/ABL1/LILRB4/CEP85/PIP4K2B/DEPTOR/PRKCD/RABGEF1/TFAP4/DUSP1/LRRK2/RGS2/LRP5/ARRB2/SOCS5/SLC8A1/TARDBP/AKT1/SMCR8/DNAJC10/CHMP6/PTPN1/LYN/CSK/PAQR3/TMED2/LRP1/CALM3/PTPRJ/IL1B/ANGPT1…	142
BP	GO:1901216	positive regulation of neuron death	45/5019	91/18903	2.48735712278625e-06	5.39124116715095e-05	3.93539392771963e-05	IFNG/GSK3A/TNF/ITGB2/BCL2L11/ABL1/AIFM1/FASLG/EIF2S1/PARP1/CLU/MAP3K11/REST/ITGAM/GRN/BACE1/FYN/CASP2/FCGR2B/GRIK5/SRPK2/ITGA1/TYROBP/FOXO3/PICALM/KMO/FBXW7/NQO1/CASP3/TLR6/CCL3/DDIT3/TLR4/FOS/ATM/AIMP2/NF1/PRNP/TP53/CAPN2/MCL1/DDIT4/EGR1/MYBL2/MAP3K5	45
BP	GO:0070555	response to interleukin-1	63/5019	141/18903	2.49977496131279e-06	5.39985172386283e-05	3.94167929532749e-05	MAPK13/XCL2/MYD88/CD40/ZBP1/IL1RN/XCL1/IL6/HES1/SMPD1/TAF9/ZC3H12A/OTUD4/IRAK2/BMI1/MAPK3/NR1D1/MTHFR/RORA/PRKCI/SIRPA/EDN1/ZNF675/UPF1/CHI3L1/CCL20/PLCB1/RBMX/USP10/RELA/CCL4/CD38/IL1B/CCL5/KMO/MIR142/IL1R1/IGBP1/GBP1/CCL4L1/GBP2/KLF2/HYAL3/NFKB1/TANK/HIF1A/IRAK4/RC3H1/CCL3/GCLC/PRKCA/MMP2/CCL3L3/IL1R2/APP/CD47/CYBA/LGALS9/CCL23/CAMP/EGR1/MIR27A/CCL1	63
BP	GO:2000058	regulation of ubiquitin-dependent protein catabolic process	73/5019	170/18903	2.57714240411046e-06	5.53427220086595e-05	4.03980095461858e-05	DNAJB2/ZFAND2A/N4BP1/XPO1/AXIN2/TRIM39/SUMO2/RPL11/GSK3A/HFE/UBE2K/SMARCC1/GLMN/TAF9/UBE3A/PDCL3/ARAF/KEAP1/RPS7/SMAD7/PLK3/FBXO22/CSNK2A2/HECTD1/RNF19B/EIF3H/HSPA1A/COMMD1/UCHL5/HSPA1B/VCP/CSNK1D/HSP90AB1/LRRK2/CLU/HERPUD1/GABARAP/RNF144B/PIAS1/SOCS5/AKT1/CSNK2A1/USP14/PTK2B/UBQLN4/SDCBP/FBXW7/SOCS4/OGT/DET1/CSNK1E/TRIB1/DDA1/RNF144A/SH3RF1/LAPTM5/PSEN1/GCLC/RAD23B/UBQLN2/FBXW8/TRIB2/CBFA2T3/DES…	73
BP	GO:0051091	positive regulation of DNA-binding transcription factor activity	105/5019	266/18903	2.57931360002824e-06	5.53427220086595e-05	4.03980095461858e-05	TRAF1/NPM1/MYD88/CD40/CD40LG/FLOT2/KDM1A/KIT/IL6/RBCK1/PPIA/RNF220/IRAK2/RPS3/CRTC2/IL18RAP/TNF/CARD11/NLRC4/PRKD2/MBTPS2/PRKCI/SMARCA4/EDN1/FLOT1/ADAM8/HSPA1A/NOD2/SLCO3A1/CRTC3/HCLS1/HSPA1B/S100A12/CARD16/TP53BP1/BCL10/ERC1/PSMA6/DHX9/IL18/CLU/LRP5/TRIM26/NTSR1/PINK1/AKT1/CLEC7A/RELA/IL18R1/ANXA3/CFLAR/LTF/CX3CR1/FER/PHB2/TCF3/SMARCB1/NFAM1/TRIM21/IL1B/PPP2R5B/RIPK3/CAT/S100A8/PRKCH/DHX33/MAVS/…	105
BP	GO:0002269	leukocyte activation involved in inflammatory response	29/5019	50/18903	2.63798298697808e-06	5.64122515676851e-05	4.11787240424602e-05	MYD88/IFNG/IL6/TNF/NR1D1/ITGB2/C5AR1/LDLR/LRRK2/CLU/IFNGR2/MIR128-1/ITGAM/MMP8/GRN/CX3CR1/TYROBP/MIR142/PTPRC/TRAF3IP2/CCL3/JUN/ATM/IFNGR1/APP/TLR2/CST7/AZU1/STAP1	29
BP	GO:0001911	negative regulation of leukocyte mediated cytotoxicity	18/5019	25/18903	2.69404177636172e-06	5.69881958417648e-05	4.15991407013788e-05	KIR2DL4/IL7R/LILRB1/KLRD1/KLRC1/SERPINB9/CEACAM1/ARRB2/FCGR2B/CX3CR1/HLA-E/HLA-F/PTPRC/HLA-A/HLA-B/HAVCR2/CLEC12B/LGALS9	18
BP	GO:0050860	negative regulation of T cell receptor signaling pathway	18/5019	25/18903	2.69404177636172e-06	5.69881958417648e-05	4.15991407013788e-05	UBASH3A/CD160/BTN2A2/CEACAM1/LILRB4/PHPT1/PVRIG/PTPRJ/ELF1/GBP1/LGALS3/EZR/LAPTM5/CBLB/PRNP/PTPN6/DUSP22/PTPN22	18
BP	GO:0032613	interleukin-10 production	35/5019	65/18903	2.71653016943171e-06	5.69881958417648e-05	4.15991407013788e-05	IL23A/CD28/CD40LG/XCL1/IL6/CD274/LILRA5/LILRB1/PIBF1/BCL3/IRF4/SASH3/NOD2/LILRB4/CD83/MMP8/CLEC7A/PDCD1LG2/FCGR2B/HMGB1/TYROBP/JAK3/PLCG2/STAT3/CD34/TLR4/F2RL1/TRIB2/SYK/TNFRSF21/CD47/HGF/TLR2/LGALS9/EPX	35
BP	GO:0032653	regulation of interleukin-10 production	35/5019	65/18903	2.71653016943171e-06	5.69881958417648e-05	4.15991407013788e-05	IL23A/CD28/CD40LG/XCL1/IL6/CD274/LILRA5/LILRB1/PIBF1/BCL3/IRF4/SASH3/NOD2/LILRB4/CD83/MMP8/CLEC7A/PDCD1LG2/FCGR2B/HMGB1/TYROBP/JAK3/PLCG2/STAT3/CD34/TLR4/F2RL1/TRIB2/SYK/TNFRSF21/CD47/HGF/TLR2/LGALS9/EPX	35
BP	GO:0080164	regulation of nitric oxide metabolic process	35/5019	65/18903	2.71653016943171e-06	5.69881958417648e-05	4.15991407013788e-05	IFNG/DNM2/PKD2/ZC3H12A/TNF/SIRPA/EDN1/KHSRP/SOD2/HSP90AB1/CLU/MMP8/AKT1/CLEC7A/PTK2B/TSPO/MIR181B1/CX3CR1/IL1B/KLF2/ROCK2/IL10/TMEM106A/TLR6/CD34/PTX3/KLF4/PTGS2/TLR4/INSR/SMAD3/CD47/CD36/ASS1/CAV1	35
BP	GO:0045860	positive regulation of protein kinase activity	154/5019	420/18903	2.71839220077233e-06	5.69881958417648e-05	4.15991407013788e-05	FLT3/CCR7/FAM20A/TCL1A/NPM1/IL23A/NRG1/AXIN2/CD40/CD40LG/IFNG/MOB3A/SLC11A1/EPHA4/KIT/RASGRP1/PKD2/PPIA/LILRA5/CCNK/PIBF1/RPS3/PDE5A/TNF/MAP2K3/UNC119/PIK3R5/RPLP1/TGFBR2/EDN1/ERN1/MAP2K6/MOB3C/ETAA1/ADAM8/NOD2/LCP2/ITGB3/CHI3L1/ABL1/LAT/NEDD9/CCND3/MLST8/PRKCD/S100A12/DAZAP2/HSP90AB1/LRRK2/MIF/IL18/CLU/MAP3K11/MAP2K5/RAP1A/ANG/PINK1/XRCC6/AKT1/PTK2B/PKD1/SASH1/SPDYE3/MMD/STK4/PTPN1/LTF/CSK/CDC25…	154
BP	GO:0032695	negative regulation of interleukin-12 production	15/5019	19/18903	2.8061427727418e-06	5.86355453885983e-05	4.28016410537914e-05	CCR7/C1QBP/SLAMF1/LILRA5/LILRB1/PIBF1/MEFV/CMKLR1/TLR8/NOD2/ARRB2/JAK3/IL10/NFKB1/THBS1	15
BP	GO:0061136	regulation of proteasomal protein catabolic process	81/5019	194/18903	2.87279209334953e-06	5.97077296575371e-05	4.35842933838499e-05	DNAJB2/ZFAND2A/N4BP1/XPO1/AXIN2/TRIM39/SUMO2/RPL11/GSK3A/HFE/UBE2K/SMARCC1/GLMN/TAF9/PSMD14/ARAF/KEAP1/SMAD7/PLK3/FBXO22/PRKACA/RNF185/HECTD1/RNF19B/EIF3H/HSPA1A/COMMD1/UCHL5/F8A2/HSPA1B/VCP/CSNK1D/HSP90AB1/LRRK2/CLU/HERPUD1/GABARAP/ATXN3/RNF144B/PSMC3/PIAS1/SOCS5/PINK1/AKT1/USP14/PKD1/UBQLN4/USP13/SDCBP/FBXW7/PSMC2/SOCS4/TMTC3/GABARAPL2/OGT/PSMF1/DET1/CSNK1E/TRIB1/PSMC6/DDA1/RNF144A/SH3RF1/PSEN1…	81
BP	GO:2001234	negative regulation of apoptotic signaling pathway	94/5019	233/18903	2.87613086245252e-06	5.97077296575371e-05	4.35842933838499e-05	GRINA/KDM1A/IL1A/PPIA/XBP1/ITPRIP/TAF9/MAPK7/URI1/BMI1/TNF/MMP9/TMBIM1/HMOX1/ARMC10/SNAI1/SLC25A5/ZMYND11/MAZ/PF4/ICAM1/CSNK2A2/TRIAP1/GSTP1/HSPA1A/CAAP1/VDAC2/CREB3/HSPA1B/NDUFS3/ZNF385A/FAIM/SOD2/LRRK2/FXN/MIF/CLU/HERPUD1/MAP2K5/PPIF/ARRB2/PINK1/AKT1/CSNK2A1/GNAI2/RELA/RAF1/TCF7L2/CFLAR/PTPN1/PLAUR/CX3CR1/SLC35F6/IL1B/CTTN/OPA1/RRN3/ENO1/TAF9B/LGALS3/SLC25A6/BIRC6/PEA15/HSPB1/TMBIM6/NLE1/TNFAIP…	94
BP	GO:1903050	regulation of proteolysis involved in protein catabolic process	92/5019	227/18903	2.90649442430438e-06	6.01428004822078e-05	4.39018779675204e-05	DNAJB2/ZFAND2A/N4BP1/XPO1/AXIN2/TRIM39/EPHA4/SUMO2/RPL11/GSK3A/HFE/UBE2K/SMARCC1/GLMN/TAF9/UBE3A/PSMD14/PDCL3/ARAF/KEAP1/RPS7/SMAD7/PLK3/FBXO22/PRKACA/RNF185/CSNK2A2/HECTD1/RNF19B/EIF3H/HSPA1A/COMMD1/UCHL5/F8A2/HSPA1B/VCP/CSNK1D/HSP90AB1/LRRK2/CLU/HERPUD1/GABARAP/ATXN3/RNF144B/PSMC3/PIAS1/SOCS5/PINK1/AKT1/CSNK2A1/USP14/PTK2B/PKD1/UBQLN4/USP13/SDCBP/FBXW7/PSMC2/SOCS4/TMTC3/GABARAPL2/OGT/PSMF1/DET1…	92
BP	GO:0097191	extrinsic apoptotic signaling pathway	91/5019	224/18903	2.91809517568434e-06	6.01880663010505e-05	4.39349202342423e-05	TRAF1/DEDD2/MAL/DEDD/BAG3/IFNG/IL1A/GSK3A/CD27/RBCK1/ITPRIP/PARP2/MAPK7/FAF1/TNF/TMBIM1/HMOX1/ZMYND11/BCL2L11/PF4/ICAM1/TNFRSF1B/SPI1/GSTP1/HSPA1A/HSPA1B/FASLG/DEPTOR/FAIM/BCL10/TNFSF12/MAP2K5/GABARAP/G0S2/AKT1/SKIL/RELA/RAF1/TCF7L2/CFLAR/STK4/MKNK2/CASP2/ITM2C/DDX47/SGPP1/BCL2A1/FOXO3/IL1B/CTTN/TNFSF10/BLOC1S2/ZDHHC3/SORT1/LGALS3/SP100/BIRC6/PEA15/PTPRC/TNFAIP3/TNFRSF10A/TNFRSF10B/BID/TMC8/BRCA1…	91
BP	GO:0042554	superoxide anion generation	26/5019	43/18903	2.94600840380612e-06	6.05684171509207e-05	4.42125613893259e-05	CD177/FPR2/ITGB2/EDN1/GSTP1/NCF2/PRKCD/SOD2/ITGAM/GNAI2/CLEC7A/NCF1/TYROBP/NCF1B/NCF1C/SH3PXD2B/HVCN1/CYBB/NCF4/F2RL1/GNAI3/TGFB1/SYK/CYBA/SOD1/ALOX12	26
BP	GO:0051348	negative regulation of transferase activity	108/5019	276/18903	3.01215364121676e-06	6.17298409677564e-05	4.50603550781212e-05	ADORA2A/IPO7/NPM1/DUSP16/IPO5/INPP5K/IFNG/RPL11/GSK3A/IBTK/PPIA/PIP4K2C/SMPD1/RPS20/PIK3IP1/SH3BP5/POT1/RPS7/SMAD7/SH3BP5L/HEG1/GADD45B/SMYD3/MVP/CEACAM1/ZNF675/GSTP1/NF2/RGS14/YWHAG/ABL1/LILRB4/CEP85/PHPT1/PIP4K2B/ZFP36/DEPTOR/PRKCD/TFAP4/DUSP1/RGS2/LRP5/RPL37/SOCS5/SLC8A1/AKT1/SMCR8/CHMP6/PTPN1/LYN/CSK/PAQR3/PTPRJ/IL1B/CDKN1B/MAD2L1/MIDN/CAMK2N1/SOCS4/SPRY2/HEXIM1/PRKAR1A/LATS2/STK38/TERF1/PPP2…	108
BP	GO:0071260	cellular response to mechanical stimulus	38/5019	73/18903	3.07330020702238e-06	6.27817301076713e-05	4.58281927625265e-05	TNFSF14/BAG3/MYD88/CD40/SLC9A1/CNN2/MAP3K14/CASP5/KCNJ2/MAPK3/IRF1/TLR5/PIEZO1/TLR8/ITGB3/BCL10/MAP3K2/CASP2/MAPK8/CHEK1/IL1B/CASP1/TNFRSF10A/TNFRSF10B/NFKB1/BNIP3/TLR7/PTGS2/TLR4/TNFRSF1A/FAS/GCLC/GADD45A/SLC38A2/PLEC/CYBA/PIEZO2/IGF1R	38
BP	GO:0032611	interleukin-1 beta production	52/5019	111/18903	3.39244126726328e-06	6.88181659573787e-05	5.02345534226194e-05	CCR7/MYD88/IFNG/IL6/LILRA5/ZC3H12A/TNF/MEFV/NLRC4/NLRP12/NLRP1/SIRPA/GSTP1/S1PR3/TLR8/NOD2/LILRA2/LILRB4/CARD16/ARRB2/CLEC7A/ORM1/CX3CR1/TYROBP/ORM2/CASP1/NOD1/AIM2/NAIP/NLRP3/GBP5/HSPB1/TNFAIP3/HK1/STAT3/MNDA/TMEM106A/TLR6/CCL3/TLR4/MALT1/F2RL1/SMAD3/PYHIN1/APP/CD36/TRIM16/SERPINB1/LGALS9/P2RX7/AZU1/EGR1	52
BP	GO:0032651	regulation of interleukin-1 beta production	52/5019	111/18903	3.39244126726328e-06	6.88181659573787e-05	5.02345534226194e-05	CCR7/MYD88/IFNG/IL6/LILRA5/ZC3H12A/TNF/MEFV/NLRC4/NLRP12/NLRP1/SIRPA/GSTP1/S1PR3/TLR8/NOD2/LILRA2/LILRB4/CARD16/ARRB2/CLEC7A/ORM1/CX3CR1/TYROBP/ORM2/CASP1/NOD1/AIM2/NAIP/NLRP3/GBP5/HSPB1/TNFAIP3/HK1/STAT3/MNDA/TMEM106A/TLR6/CCL3/TLR4/MALT1/F2RL1/SMAD3/PYHIN1/APP/CD36/TRIM16/SERPINB1/LGALS9/P2RX7/AZU1/EGR1	52
BP	GO:0000956	nuclear-transcribed mRNA catabolic process	57/5019	125/18903	3.40108546176598e-06	6.88181659573787e-05	5.02345534226194e-05	EIF3E/ZFP36L1/PAIP1/SYNCRIP/POLR2D/MTPAP/EXOSC2/ZC3H12A/PATL1/DIS3/NCBP2/PARN/EXOSC8/MRTO4/NCBP1/SSB/PATL2/TNRC6C/CNOT7/HNRNPAB/DHX34/YBX1/MAGOHB/UPF1/EIF4A3/TOB1/ZFP36/EXOSC5/LSM7/DHX9/BTG2/PAN3/LSM4/HNRNPD/CPEB3/MLH1/CASC3/UPF3A/DCP1B/EXOSC6/CNOT2/GSPT2/NBAS/CSDE1/EXOSC10/GSPT1/POLR2G/PNRC2/UPF2/ZCCHC7/EXOSC9/PELO/RBM8A/RC3H1/UPF3B/ZFP36L2/ATM	57
BP	GO:0031098	stress-activated protein kinase signaling cascade	98/5019	246/18903	3.43983586920944e-06	6.93826831158522e-05	5.06466287367579e-05	TRAF1/CCR7/MAPK13/GADD45G/ZFP36L1/DUSP16/MYD88/IL1A/MINK1/CD27/RASGRP1/SLAMF1/PPIA/ZC3H12A/TNF/PRMT1/MAPK3/MAP2K3/FKTN/MBIP/GADD45B/ZMYND11/MAP3K3/SIRPA/ZNF675/SPI1/MAP2K6/GSTP1/CCM2/NOD2/EPHB1/PHLPP1/FOXO1/ZFP36/MAP4K3/DUSP1/LRRK2/PLCB1/RNF13/SH2D3C/MAP3K11/KLHDC10/PINK1/MMP8/PTK2B/SASH1/LYN/FCGR2B/TRAF3/MIR181B1/MAPK8/HMGB1/NCF1/MAPK14/MAPK1/IL1B/SCIMP/MAP2K1/SDCBP/IGBP1/DLG1/NOD1/NBR1/MYC/NAIP…	98
BP	GO:0032743	positive regulation of interleukin-2 production	22/5019	34/18903	3.46239937672357e-06	6.93999423660517e-05	5.06592273103194e-05	CD28/CD3E/IL1A/GLMN/STOML2/RPS3/CARD11/IRF4/PRKD2/SASH3/ABL1/STAT5B/CD83/CLEC7A/CD4/IL1B/PTPRC/CCR2/PLCG2/MALT1/CD86/PDE4B	22
BP	GO:0036336	dendritic cell migration	22/5019	34/18903	3.46239937672357e-06	6.93999423660517e-05	5.06592273103194e-05	CCR7/C1QBP/EXT1/CXCR1/CALR/SLAMF1/CXCR2/SLAMF8/NLRP12/ALOX5/SPI1/CCR1/CCR5/HMGB1/CCR6/CCL5/CCR2/CXCR4/PIK3CG/GPR183/DOCK8/LGALS9	22
BP	GO:0070585	protein localization to mitochondrion	58/5019	128/18903	3.58750814714176e-06	7.16175226895367e-05	5.22779736933319e-05	BAG3/HSPA1L/MFN2/GSK3A/TIMM23/TOMM20/MTX2/TIMM50/LMAN1/MTX1/TIMM13/HUWE1/TIMM9/SAMM50/TOMM40L/RAC2/TOMM5/TOMM40/CSNK2A2/BCS1L/HSPA4/PDCD5/AIFM1/DNM1L/PMPCA/IMMP2L/LRRK2/GZMB/PINK1/AKT1/TOMM34/TSPO/DNAJC19/MIPEP/MAPK8/TIMM10B/CALM3/PMPCB/RALA/FBXW7/IMMP1L/AGK/HAX1/UBE2D3/TIMM21/HK1/BID/GRPEL1/DDIT3/AIP/TIMM8B/PITRM1/HPS4/MTCH2/PRKAA1/HK2/BNIP3L/RHOU	58
BP	GO:0022411	cellular component disassembly	173/5019	483/18903	3.59543709467333e-06	7.16175226895367e-05	5.22779736933319e-05	DEDD2/SET/ABCE1/MFN2/EPHA4/WDR45/IQSEC1/CHMP7/IL6/GSK3A/WDR1/SMARCC1/VAMP8/CAPZB/EIF2D/SSRP1/TNF/MMP9/WIPI1/CKAP5/UBA5/HSPA2/ZFAND1/CHMP2A/ATG9A/DENR/PLK3/SLC25A5/DFFA/SMARCA4/SNX14/HUWE1/TOM1/TBC1D25/CSNK2A2/STMN3/DPP4/FLOT1/CHMP1A/ASCC3/ADAM8/UPF1/SUPT16H/CHMP4B/NEDD9/SMARCE1/UFC1/AIFM1/VDAC1/DNM1L/VCP/SYNJ1/NAPA/GFM2/STMN1/GABARAP/MTIF2/MAP1LC3B/NDEL1/ITGAM/PINK1/MMP8/FLII/PNPLA2/GABARAPL1/SMC…	173
BP	GO:0051090	regulation of DNA-binding transcription factor activity	164/5019	454/18903	3.63235004678059e-06	7.19549506425225e-05	5.25242828225383e-05	TRAF1/ID3/NFKBIB/NPM1/NFKBIE/WWP2/MYD88/CD40/CD40LG/EOMES/EIF2AK4/FLOT2/KDM1A/XCL1/KIT/IL6/CYP1B1/PKD2/RBCK1/PPIA/HES1/HDAC2/RNF220/ZC3H12A/IRAK2/RPS3/CRTC2/IL18RAP/ZNF431/FAF1/TNF/BCL3/COMMD7/MAPK3/HMOX1/CMKLR1/CARD11/KEAP1/NLRC4/PRKD2/SMAD7/MBTPS2/NLRC5/ID2/NLRP12/PRKCI/SMARCA4/SGK1/TMSB4X/EDN1/ZNF675/SPI1/FLOT1/ADAM8/HSPA1A/COMMD1/NOD2/SLCO3A1/CRTC3/HCLS1/HSPA1B/S100A12/CARD16/TP53BP1/BCL10/ER…	164
BP	GO:0033157	regulation of intracellular protein transport	91/5019	225/18903	3.63488411910146e-06	7.19549506425225e-05	5.25242828225383e-05	XPO1/BAG3/IPO5/INPP5K/IFNG/HSPA1L/RAN/SIRT7/GSK3A/XPO4/ZC3H12A/PTPN11/LMAN1/UBE2G2/CTDSPL2/VAMP2/ZFAND1/PCM1/CEP290/PLK3/PRKACA/ITGB2/HUWE1/RAC2/CSNK2A2/OAZ2/GDI1/HCLS1/PDCD5/PRKCD/HSP90AB1/LRRK2/GZMB/TM9SF4/ANK3/PCNT/ERLEC1/NDEL1/ITGAM/NUP54/PINK1/TARDBP/TCF7L2/PTPN1/OAZ1/FYN/NOLC1/TXN/KCNE1/MAPK8/MAPK14/IL1B/ANGPT1/EFCAB7/ANP32B/UFM1/BCAS3/FBXW7/LCP1/MAVS/HAX1/SP100/TRIM28/UBE2D3/FRAT1/YWHAE/JU…	91
BP	GO:0042088	T-helper 1 type immune response	27/5019	46/18903	4.25238968928779e-06	8.39190730657596e-05	6.12576214499742e-05	IL4R/IL23A/SLC11A1/XCL1/SEMA4A/SLAMF1/BCL3/LEF1/TBX21/IL18BP/IL18/SPN/SOCS5/IL18R1/HMGB1/IL1B/IL1R1/JAK3/CCR2/STAT6/TLR4/IL12RB1/HAVCR2/ARID5A/HLX/IL27RA/IL1RL1	27
BP	GO:0045862	positive regulation of proteolysis	138/5019	372/18903	4.3657761923237e-06	8.58916091499007e-05	6.26974951798001e-05	DNAJB2/ZFAND2A/LCK/TNIP1/AXIN2/IFNG/EPHA4/SUMO2/GSK3A/HDAC2/ZC3H12A/PSMD14/RPS3/TNF/PDCD2/MEFV/KEAP1/NLRC4/SMAD7/PLK3/NLRP12/NLRP1/FBXO22/MBP/FAM162A/RNF185/BCL2L11/TNFRSF1B/HECTD1/RNF19B/ADAM8/HSPA1A/HSPA1B/PDCD5/AIFM1/FASLG/CR1/VCP/BCL10/TFAP4/CSNK1D/LRRK2/CLU/RCN3/HERPUD1/AKIRIN2/GABARAP/MYH9/CLPX/REST/ATXN3/RNF144B/PSMC3/PIAS1/SOCS5/PINK1/AKT1/GRN/CLEC7A/PTK2B/EIF2AK3/CTSH/CFLAR/LYN/FYN/CASP2…	138
BP	GO:0072655	establishment of protein localization to mitochondrion	56/5019	123/18903	4.3810861667192e-06	8.59284200920325e-05	6.27243657191894e-05	BAG3/HSPA1L/MFN2/GSK3A/TIMM23/TOMM20/MTX2/TIMM50/LMAN1/MTX1/TIMM13/HUWE1/TIMM9/SAMM50/TOMM40L/RAC2/TOMM5/TOMM40/CSNK2A2/BCS1L/HSPA4/PDCD5/AIFM1/PMPCA/IMMP2L/LRRK2/GZMB/PINK1/AKT1/TOMM34/TSPO/DNAJC19/MIPEP/MAPK8/TIMM10B/CALM3/PMPCB/RALA/FBXW7/IMMP1L/AGK/HAX1/UBE2D3/TIMM21/HK1/BID/GRPEL1/DDIT3/AIP/TIMM8B/PITRM1/HPS4/PRKAA1/HK2/BNIP3L/RHOU	56
BP	GO:1990868	response to chemokine	47/5019	98/18903	4.43456942843891e-06	8.64470637970683e-05	6.31029552172597e-05	CCR7/CCRL2/XCL2/CXCR1/CXCR3/PADI2/XCL1/CXCR5/ZC3H12A/CXCR2/CXCR6/CMKLR1/CXCL5/CCR3/PF4/EDN1/PF4V1/CCR1/CCL20/DUSP1/PPBP/PTK2B/CCL4/CCR4/CXCL1/LYN/CCR5/CX3CR1/OXSR1/CCR6/CCL5/SLC12A2/CCL4L1/CCR2/LRCH1/CXCR4/HIF1A/CCL3/WNK1/SH2B3/CCL3L3/CXCL9/DOCK8/CXCL2/CCL23/FOXC1/CCL1	47
BP	GO:1990869	cellular response to chemokine	47/5019	98/18903	4.43456942843891e-06	8.64470637970683e-05	6.31029552172597e-05	CCR7/CCRL2/XCL2/CXCR1/CXCR3/PADI2/XCL1/CXCR5/ZC3H12A/CXCR2/CXCR6/CMKLR1/CXCL5/CCR3/PF4/EDN1/PF4V1/CCR1/CCL20/DUSP1/PPBP/PTK2B/CCL4/CCR4/CXCL1/LYN/CCR5/CX3CR1/OXSR1/CCR6/CCL5/SLC12A2/CCL4L1/CCR2/LRCH1/CXCR4/HIF1A/CCL3/WNK1/SH2B3/CCL3L3/CXCL9/DOCK8/CXCL2/CCL23/FOXC1/CCL1	47
BP	GO:0034113	heterotypic cell-cell adhesion	33/5019	61/18903	4.54689821728072e-06	8.83673775115286e-05	6.45047086719651e-05	LCK/IL1RN/CD2/MAPK7/TNF/LILRB2/SKAP1/NINJ1/ITGB2/MBP/SIRPA/ITGAX/FLOT1/ITGB3/MAP2K5/ITGA4/IL1B/PTPRC/ITGA7/JUP/IL10/CEACAM6/CD1D/GCNT2/KLF4/WNK1/MYADM/CD47/JAM3/ITGB7/CD200/CD200R1/ITGA5	33
BP	GO:0045730	respiratory burst	24/5019	39/18903	4.57778713768991e-06	8.86980938133009e-05	6.4746118559863e-05	SLC11A1/RPS19/SLAMF8/PIK3CD/CD55/RAC2/NCF2/HCK/GRN/CLEC7A/CD52/NCF1/NCF1B/NCF1C/BCR/CYBB/NCF4/CD24/INSR/PIK3CG/CYBA/DUSP10/MPO/PGAM1	24
BP	GO:0010586	miRNA metabolic process	44/5019	90/18903	4.70605914046721e-06	9.06529390904187e-05	6.61730786966262e-05	MYB/PPARD/GATA3/GNL3/MIAT/RARA/DROSHA/NR1H2/ZC3H12A/SND1/TNF/ETS1/PNPT1/PARN/XPO5/ZNF512B/SMARCA4/SPI1/KHSRP/KLF5/LILRB4/REST/RELA/DDX17/WT1/ZSWIM8/FOXO3/MYC/GATA2/IL10/STAT3/NFKB1/HIF1A/RC3H1/TRIM71/KLF4/FOS/JUN/SMAD1/SMAD3/TGFB1/AGO4/TP53/EGR1	44
BP	GO:2000573	positive regulation of DNA biosynthetic process	38/5019	74/18903	4.70703405974649e-06	9.06529390904187e-05	6.61730786966262e-05	CCT2/CCT6A/CCT4/CCT8/HNRNPA1/CYP1B1/CCT7/CCT3/MAPKAPK5/DKC1/TNF/POT1/RFC3/MAPK3/PARN/PRKD2/POLG2/HSP90AB1/NVL/ARRB2/CCT5/PTK2B/PTGES3/NAF1/DSCC1/ATR/GINS2/RFC4/GINS1/MAPK1/RFC5/XRCC5/MYC/TNKS/KLF4/PCNA/ATM/HGF	38
BP	GO:0019058	viral life cycle	121/5019	319/18903	4.87120997630238e-06	9.35330828482805e-05	6.82754703174482e-05	CR2/N4BP1/CD28/WWP2/INPP5K/TNIP1/EIF2AK4/OASL/CHMP7/SLAMF1/PPIA/SMPD1/CCNK/VAMP8/NUCKS1/ZC3H12A/VPS37C/RPSA/PCSK5/TOP2B/TNFRSF14/ZNFX1/CXCR6/TNF/PPIH/CHMP2A/ISG20/CNOT7/CD55/ICAM1/GPR15/IFITM2/IFITM1/DPP4/NPC1/CHMP1A/HSPA1A/APOBEC3A/VPS37A/HSPA1B/ITGB3/FCN1/CHMP4B/PCBP1/LDLR/CR1/VCP/SELPLG/HSP90AB1/TRIM26/IFITM3/HTATSF1/PIKFYVE/ATG16L1/ANPEP/CHMP6/ZNF639/LTF/SCARB1/CCR5/CHMP3/APOBEC3B/SRPK2/SMARC…	121
BP	GO:0034612	response to tumor necrosis factor	100/5019	254/18903	5.04829067661064e-06	9.66430257073306e-05	7.05456062404398e-05	TRAF1/TCL1A/ZFP36L1/EXT1/TNFRSF13C/GATA3/XCL2/INPP5K/CD40/CXCL16/XCL1/CYP1B1/UBE2K/HES1/SMPD1/ZC3H12A/KAT2A/RPS3/TNFRSF14/TNF/COMMD7/MAPK3/NR1D1/RORA/MBP/TMSB4X/TNFRSF1B/EDN1/ZNF675/GSTP1/HSPA1A/IL18BP/ILK/HSPA1B/CHI3L1/CD14/BIRC3/ZFP36/CCL20/PRPF8/MAP4K3/CARD16/DHX9/AKT1/PTK2B/RELA/CCL4/GCH1/TRAF3/MIR181B1/ADAM9/MAPK14/MAPK1/FOXO3/CCL5/MIR142/IGBP1/GBP1/CCL4L1/CASP1/NFKBIA/AIM2/GBP2/NAIP/KLF2/SP…	100
BP	GO:1901653	cellular response to peptide	138/5019	373/18903	5.13573501073146e-06	9.8023551219752e-05	7.15533355462161e-05	ZFP36L1/FPR2/PXN/INPP5K/CDK4/SLC9A1/EPHA4/NCL/POR/APEX1/GSK3A/CYP1B1/APPL1/SMARCC1/PRKDC/PIP4K2C/XBP1/NUCKS1/FOXO4/SH2B2/PTPN11/EEF2K/TNF/VAMP2/SOGA1/PRKCI/CEACAM1/ZDHHC7/BCL2L11/ICAM1/EDN1/APRT/GRB2/SOCS3/NOD2/YWHAG/ITGB3/ADIPOR1/PIP4K2B/FOXO1/STXBP4/CCND3/STAT5B/PRKCD/PARP1/PLCB1/AGTRAP/USO1/NR4A1/WDTC1/PTPRE/NDEL1/AKT1/GNAI2/RAP1GDS1/NCOA1/RELA/USF1/ITGA4/BACE1/CFLAR/PTPN1/LYN/FYN/FCGR2B/TYK2/…	138
BP	GO:0070301	cellular response to hydrogen peroxide	45/5019	93/18903	5.22510106087623e-06	9.94324291167935e-05	7.25817609772093e-05	MAPK13/APEX1/IL6/CYP1B1/HDAC2/MAPK7/RPS3/PLEKHA1/IMPACT/SIRPA/EDN1/ERN1/IL18BP/KDM6B/ABL1/AIFM1/PRKCD/LRRK2/FXN/PPIF/ANKZF1/PINK1/RELA/FYN/TXN/ARG1/NET1/FOXO3/RIPK3/CAT/OSER1/RHOB/KLF2/NQO1/TNFAIP3/IL10/BNIP3/ZNF277/STAT6/PRKAA1/PCNA/HGF/EZH2/NR4A3/MAP3K5	45
BP	GO:0051403	stress-activated MAPK cascade	95/5019	239/18903	5.37713985739455e-06	0.000101837083959674	7.43370643987281e-05	TRAF1/CCR7/MAPK13/GADD45G/ZFP36L1/DUSP16/MYD88/IL1A/MINK1/CD27/RASGRP1/SLAMF1/PPIA/ZC3H12A/TNF/PRMT1/MAPK3/MAP2K3/FKTN/MBIP/GADD45B/ZMYND11/MAP3K3/SIRPA/ZNF675/SPI1/MAP2K6/GSTP1/CCM2/NOD2/EPHB1/PHLPP1/FOXO1/ZFP36/MAP4K3/DUSP1/LRRK2/PLCB1/SH2D3C/MAP3K11/KLHDC10/PINK1/MMP8/PTK2B/SASH1/FCGR2B/TRAF3/MIR181B1/MAPK8/HMGB1/NCF1/MAPK14/MAPK1/IL1B/SCIMP/MAP2K1/SDCBP/IGBP1/DLG1/NOD1/NBR1/MYC/NAIP/RASSF2/EZ…	95
BP	GO:0046640	regulation of alpha-beta T cell proliferation	26/5019	44/18903	5.38331785711132e-06	0.000101837083959674	7.43370643987281e-05	IL23A/CD28/CD3E/XCL1/CD274/TNFRSF14/CARD11/IRF1/CD55/TGFBR2/TWSG1/ZAP70/IL18/TYK2/ZBTB7B/HLA-E/PTPRC/CCR2/HLA-A/LGALS9C/SH3RF1/LGALS9B/SYK/CBLB/LGALS9/PTPN22	26
BP	GO:0022616	DNA strand elongation	23/5019	37/18903	5.66887540837678e-06	0.0001066650700465	7.78613042796998e-05	NUCKS1/POT1/RFC3/POLA1/ACTL6A/TFPT/POLE3/UCHL5/RUVBL1/MCM3/LIG3/POLD2/MCM4/ACTR5/RAD50/RFC4/GINS1/MCM7/ACTR8/INO80C/PCNA/RUVBL2/POLE	23
BP	GO:0032434	regulation of proteasomal ubiquitin-dependent protein catabolic process	62/5019	141/18903	5.67189925176884e-06	0.0001066650700465	7.78613042796998e-05	DNAJB2/ZFAND2A/N4BP1/XPO1/AXIN2/TRIM39/SUMO2/RPL11/GSK3A/HFE/UBE2K/SMARCC1/GLMN/TAF9/ARAF/KEAP1/SMAD7/PLK3/FBXO22/HECTD1/RNF19B/EIF3H/HSPA1A/COMMD1/UCHL5/HSPA1B/VCP/CSNK1D/HSP90AB1/LRRK2/CLU/HERPUD1/GABARAP/RNF144B/PIAS1/SOCS5/AKT1/USP14/UBQLN4/SDCBP/SOCS4/OGT/DET1/CSNK1E/TRIB1/DDA1/RNF144A/SH3RF1/PSEN1/GCLC/RAD23B/UBQLN2/FBXW8/TRIB2/CBFA2T3/DESI1/CEBPA/UFL1/MAP1A/SVIP/MDM2/CAV1	62
BP	GO:0000470	maturation of LSU-rRNA	19/5019	28/18903	5.72870334082315e-06	0.000107103301641003	7.81811961009844e-05	RPL7/RPL35/RPL10A/RPL7L1/WDR12/RSL1D1/ZNHIT6/NHP2/MRPL1/MAK16/GTPBP4/RPF2/NSA2/URB1/RRP15/LAS1L/DDX18/RPF1/NOL9	19
BP	GO:0031342	negative regulation of cell killing	19/5019	28/18903	5.72870334082315e-06	0.000107103301641003	7.81811961009844e-05	KIR2DL4/IL7R/LILRB1/KLRD1/KLRC1/SERPINB9/CEACAM1/HSP90AB1/ARRB2/FCGR2B/CX3CR1/HLA-E/HLA-F/PTPRC/HLA-A/HLA-B/HAVCR2/CLEC12B/LGALS9	19
BP	GO:0070664	negative regulation of leukocyte proliferation	46/5019	96/18903	5.75183830822805e-06	0.000107222315285161	7.82680713784967e-05	BLK/XCL1/CD274/GLMN/LILRB1/RASSF5/CRTAM/TNFRSF14/PDE5A/LILRB2/BTN2A2/TWSG1/GSTP1/LILRB4/CR1/CTLA4/BCL6/SPN/LYN/PDCD1LG2/FCGR2B/ARG1/ZBTB7B/TYROBP/DLG1/PRKAR1A/LST1/TNFAIP3/LGALS9C/IL10/CASP3/MNDA/CD300A/RC3H1/LGALS9B/PELI1/HAVCR2/CD86/ATM/CBLB/PTEN/TNFRSF21/NF1/LGALS9/PRNP/PTPN6	46
BP	GO:0045732	positive regulation of protein catabolic process	85/5019	209/18903	5.78854803980343e-06	0.000107592953972393	7.85386230369902e-05	DNAJB2/ZFAND2A/EGLN2/AXIN2/IFNG/SUMO2/GSK3A/FAF1/TNF/KEAP1/SMAD7/PLK3/FBXO22/RNF185/TNFRSF1B/HECTD1/RNF19B/OAZ2/ADAM8/HSPA1A/HSPA1B/LPCAT1/FOXO1/LDLR/VCP/CSNK1D/LRRK2/CLU/TNFSF12/HERPUD1/GABARAP/ATXN3/AMER1/FBXL5/RNF144B/PSMC3/PIAS1/SOCS5/AKT1/CSNK2A1/OAZ1/MIR181B1/GGA3/ADAM9/LRP1/IL1B/CDKN1B/MSN/PLK2/USP13/FBXW7/PSMC2/SOCS4/TMTC3/DET1/EZR/TNFAIP3/CSNK1E/TRIB1/SNX9/ATG7/PSMC6/DDA1/RNF144A/SH3RF1/…	85
BP	GO:0050798	activated T cell proliferation	28/5019	49/18903	5.84319911134577e-06	0.000108293956863608	7.90503275658494e-05	IL23A/CD274/SLAMF1/CRTAM/RPS3/BTN2A2/BTN3A1/ABL1/LILRB4/STAT5B/IL18/GPAM/FYN/PDCD1LG2/ARG1/HMGB1/RIPK3/PRKAR1A/JAK3/CASP3/RC3H1/CD24/IL12RB1/IGFBP2/IL27RA/LGALS9/PRNP/TMIGD2	28
BP	GO:1903038	negative regulation of leukocyte cell-cell adhesion	64/5019	147/18903	6.02645483843819e-06	0.000111367492014375	8.12938872942955e-05	ADORA2A/IL4R/SOCS6/XCL1/HFE/CD274/GLMN/LILRB1/CRTAM/ZC3H12A/TNFRSF14/PDE5A/LILRB2/TBX21/SMAD7/BTN2A2/IRF1/CEACAM1/TWSG1/LILRB4/CR1/CTLA4/RUNX3/BCL6/SPN/ZC3H8/SOCS5/CBFB/AKT1/PAG1/PDCD1LG2/FCGR2B/ARG1/ZBTB7B/HMGB1/DLG1/PRKAR1A/LGALS3/JAK3/LGALS9C/IL10/CASP3/CD300A/RC3H1/LAPTM5/LGALS9B/KLF4/WNK1/PELI1/HAVCR2/CD86/FGL2/CBLB/PTEN/TARM1/TNFRSF21/HLX/ASS1/LGALS9/PRNP/PTPN6/DUSP22/PTPN22/MIR27A	64
BP	GO:0002433	immune response-regulating cell surface receptor signaling pathway involved in phagocytosis	18/5019	26/18903	6.57396910186311e-06	0.00012078723688883	8.81699304224471e-05	VAV1/APPL1/PLD2/FGR/ABL1/PRKCD/HCK/LYN/FYN/FCGR2B/PTPRJ/PTPRC/PAK1/SYK/MYO1G/YES1/CD47/VAV3	18
BP	GO:0038096	Fc-gamma receptor signaling pathway involved in phagocytosis	18/5019	26/18903	6.57396910186311e-06	0.00012078723688883	8.81699304224471e-05	VAV1/APPL1/PLD2/FGR/ABL1/PRKCD/HCK/LYN/FYN/FCGR2B/PTPRJ/PTPRC/PAK1/SYK/MYO1G/YES1/CD47/VAV3	18
BP	GO:1901224	positive regulation of NIK/NF-kappaB signaling	35/5019	67/18903	6.73162490264982e-06	0.000123329540480066	9.00257120143245e-05	TNFSF14/IL23A/NR3C2/CD27/CALR/RBCK1/RPS3/TNF/NLRP12/EDN1/NOD2/ILK/CD14/IL18/MMP8/RELA/SASH1/IL18R1/PHB2/IL1B/IFI35/NOD1/C1QTNF4/AGO3/RC3H1/LAPTM5/TLR7/TLR4/TRIM44/HAVCR2/CD86/APP/TLR2/LGALS9/PDCD4	35
BP	GO:0043405	regulation of MAP kinase activity	77/5019	186/18903	7.26360398023957e-06	0.000132695668141862	9.68626166868639e-05	FLT3/DUSP16/INPP5K/CD40/EPHA4/KIT/RASGRP1/SMPD1/RPS3/PDE5A/TNF/PIK3R5/EDN1/ZNF675/ERN1/MAP2K6/GSTP1/ADAM8/RGS14/NOD2/PRKCD/S100A12/DUSP1/LRRK2/RGS2/MIF/MAP3K11/MAP2K5/PTK2B/SASH1/PTPN1/LYN/CSK/PAQR3/ADAM9/FGD2/DVL3/PTPRJ/IL1B/TGFA/SPRY2/STK38/PTPRC/PIK3R6/CDK5RAP3/CD300A/TRIB1/VEGFA/SPRY3/AKAP13/TLR6/TAOK3/TLR4/CD24/INSR/KSR1/PSEN1/SH2B3/EPGN/TRIB2/PAK1/TGFB1/SYK/THBS1/PIK3CG/NF1/PDCD4/EZH2/P2RX7…	77
BP	GO:0043123	positive regulation of I-kappaB kinase/NF-kappaB signaling	78/5019	189/18903	7.28656997442333e-06	0.000132735978394481	9.68920415852243e-05	CCR7/SHISA5/DDX1/MYD88/CD40/SLC44A2/IL1A/WLS/MAP3K14/RBCK1/LITAF/ATP2C1/CLEC6A/TNF/SECTM1/HMOX1/CARD11/MAP3K3/DHX15/PPP5C/NOD2/CLEC4D/ABL1/TIFA/BIRC3/FASLG/S100A12/ANKRD17/CARD16/BCL10/APOL3/PINK1/CLEC7A/CANT1/RELA/PIM2/CFLAR/FYN/LTF/S100A4/TRIM21/CD4/IL1B/TNFSF10/PLK2/FKBP1A/MAVS/CASP1/NOD1/TRIM38/TRIM25/ALPK1/GOLT1B/TNFRSF10B/TRIM8/TMEM106A/IRAK4/AKAP13/TLR6/TRAF3IP2/SLC20A1/TLR4/TNFRSF1A/EDA2R…	78
BP	GO:0001774	microglial cell activation	27/5019	47/18903	7.46843747534508e-06	0.000135278156423106	9.87477315213362e-05	IFNG/IL6/TNF/NR1D1/ITGB2/C5AR1/LDLR/LRRK2/CLU/IFNGR2/MIR128-1/ITGAM/MMP8/GRN/CX3CR1/TYROBP/MIR142/PTPRC/CCL3/JUN/ATM/IFNGR1/APP/TLR2/CST7/AZU1/STAP1	27
BP	GO:0046633	alpha-beta T cell proliferation	27/5019	47/18903	7.46843747534508e-06	0.000135278156423106	9.87477315213362e-05	IL23A/CD28/CD3E/XCL1/CD274/TNFRSF14/CARD11/IRF1/CD55/TGFBR2/TWSG1/ZAP70/IL15/IL18/TYK2/ZBTB7B/HLA-E/PTPRC/CCR2/HLA-A/LGALS9C/SH3RF1/LGALS9B/SYK/CBLB/LGALS9/PTPN22	27
BP	GO:0070231	T cell apoptotic process	31/5019	57/18903	7.60733819953462e-06	0.000137404860022103	0.000100300141471117	BCL11B/IL7R/CD27/CD274/RPS6/SLC46A2/BCL3/PRKD2/DFFA/BCL2L11/ADAM8/FASLG/BCL10/ZC3H8/GIMAP8/AKT1/GPAM/ADA/CCL5/RIPK3/LGALS3/LMBR1L/JAK3/KIFAP3/HIF1A/FAS/PRELID1/DOCK8/LGALS9/P2RX7/TP53	31
BP	GO:0032928	regulation of superoxide anion generation	16/5019	22/18903	8.05054571605052e-06	0.000145000533263175	0.000105844684076999	CD177/FPR2/ITGB2/GSTP1/PRKCD/ITGAM/GNAI2/CLEC7A/TYROBP/HVCN1/F2RL1/GNAI3/TGFB1/SYK/CYBA/SOD1	16
BP	GO:0043087	regulation of GTPase activity	138/5019	376/18903	8.28320526060742e-06	0.000148645852554211	0.000108505623730368	CCR7/RASGRF2/XCL2/CD40/DOCK9/EPHA4/IQSEC1/WDR41/XCL1/GPR137B/FGD3/RASGRP1/VAV1/MYO9A/RGL1/DOCK7/TBC1D22A/SNX18/ARL2/GMIP/TBC1D5/S1PR1/TIAM1/GPR65/RALGPS1/TBC1D8/TBC1D25/STMN3/SEMA4D/ARHGAP27/RGS14/ARHGAP9/RCC2/GPSM1/AGAP5/RHOG/RASA3/AGAP11/NEDD9/CCL20/OCRL/EIF2S1/MLST8/ASAP1/LRRK2/TBC1D13/BCL6/ARAP3/AGAP9/ZC3H15/RAPGEF1/STMN1/RAP1A/ARRB2/DENND1B/NDEL1/TBCK/RAP1GAP2/TBC1D10C/SMCR8/RAP1GDS1/PTK2B/R…	138
BP	GO:0072593	reactive oxygen species metabolic process	93/5019	235/18903	8.29943218045878e-06	0.000148645852554211	0.000108505623730368	CD177/FPR2/SESN2/CYP1B1/VAV1/ZC3H12A/NDUFS4/TNF/ABCD2/ALOX5/ITGB2/NNT/TGFBR2/G6PD/RAC2/EDN1/GRB2/GSTP1/ABCB7/HP/NDUFS1/NDUFS3/FOXO1/NCF2/VDAC1/PRKCD/SOD2/IMMP2L/LRRK2/ITGAM/PINK1/MMP8/GNAI2/CLEC7A/PTK2B/TSPO/PIKFYVE/CFLAR/GCH1/FYN/PRCP/NCF1/MAPK14/TYROBP/FOXO3/DCXR/PREX1/STK17A/NCF1B/RIPK3/BST1/CAT/NCF1C/BCR/SH3PXD2B/HVCN1/AKR1C3/NQO1/PDK4/CYBB/PLCG2/BNIP3/HIF1A/NCF4/PRDX3/BRCA1/TLR6/PRDX1/TLR4/F…	93
BP	GO:0140467	integrated stress response signaling	24/5019	40/18903	8.56386965919132e-06	0.000152953582683992	0.000111650097232738	EIF2AK4/JUNB/PPP1R15A/IMPACT/CREB3/EIF2S1/MAF/EIF2AK3/ABCA7/PTPN1/BATF/TMED2/MAFB/OMA1/NCK2/PPP1R15B/DDIT3/FOS/JUN/CREBZF/CEBPD/CEBPA/CEBPE/HSPA5	24
BP	GO:0046636	negative regulation of alpha-beta T cell activation	26/5019	45/18903	9.53326231110462e-06	0.000169319899325969	0.000123596864430691	ADORA2A/IL4R/XCL1/HFE/CD274/LILRB1/ZC3H12A/TNFRSF14/TBX21/SMAD7/TWSG1/RUNX3/BCL6/SOCS5/CBFB/ZBTB7B/HMGB1/JAK3/LGALS9C/CD300A/RC3H1/LGALS9B/CBLB/TARM1/HLX/LGALS9	26
BP	GO:2000516	positive regulation of CD4-positive, alpha-beta T cell activation	26/5019	45/18903	9.53326231110462e-06	0.000169319899325969	0.000123596864430691	MYB/IL4R/IL23A/CD28/NFKBID/IFNG/CD3E/XCL1/RARA/CD160/CARD11/SASH3/CD55/TGFBR2/IL18/CD83/SOCS5/ZBTB7B/NFKBIZ/NLRP3/IL2RG/MALT1/IL12RB1/CD86/HLX/LGALS9	26
BP	GO:1903829	positive regulation of protein localization	161/5019	451/18903	9.55966275518842e-06	0.000169319899325969	0.000123596864430691	BLK/ADORA2A/NPM1/PPARD/BAG3/CCT2/IPO5/IFNG/GNL3/HSPA1L/RAN/CCT6A/CCT4/CCT8/SESN2/GPR137B/IL1A/GSK3A/XPO4/RIC3/ABAT/WLS/CCT7/CCT3/PFKFB2/PPIA/NR1H2/ZC3H12A/DKC1/ATP2C1/ABHD17B/APBB3/CD247/TM7SF3/TNF/CTDSPL2/LIMK2/IER3IP1/VAMP2/ZFAND1/PCM1/CEP290/CENPJ/PLK3/PRKCI/PRKACA/ITGB2/HUWE1/RAC2/CSNK2A2/OAZ2/NMD3/ADAM8/HCLS1/C1QTNF3/PDCD5/RHOG/NEDD9/PRKCD/DNM1L/PARP1/HSP90AB1/GZMB/STX3/TM9SF4/SOX4/ANK3/PCNT…	161
BP	GO:0045727	positive regulation of translation	62/5019	143/18903	9.81402788844856e-06	0.000172810593683935	0.000126144933966806	EIF3E/C1QBP/NPM1/CD28/RPL26/PAIP1/EIF2AK4/SYNCRIP/EIF3D/IL6/POLR2D/CYP1B1/FASTKD2/METTL5/EEF2/PCIF1/PRKDC/MRPS27/FXR1/PPP1R15A/LARP4/METTL8/NAT10/TNF/BCL3/EIF3C/TRUB2/LARP1B/YTHDF2/GUF1/IMPACT/YBX1/EIF4A3/TOB1/KHDRBS1/DHX9/SOX4/ELAVL1/ZCCHC4/RPS4X/PINK1/HNRNPD/RMND1/PTK2B/EIF2S3/CPEB3/METTL14/UPF3A/CDC123/METTL3/CSDE1/POLR2G/TRMT10C/CCL5/NCK2/PLD1/PTAFR/LARP1/PKM/UPF3B/BACE1-AS/THBS1	62
BP	GO:0007006	mitochondrial membrane organization	54/5019	120/18903	9.82493610956434e-06	0.000172810593683935	0.000126144933966806	SLC9A1/MFN2/APOOL/GSK3A/TOMM20/AFG3L2/LETM1/MTX2/TIMM50/MTX1/CHCHD3/SLC25A5/TIMM13/TIMM9/SAMM50/BCL2L11/TOMM5/TOMM40/HSPA1A/BCS1L/VDAC2/HSPA4/IMMT/PDCD5/GZMB/PPIF/PINK1/MIR29A/OMA1/SLC25A46/MAPK8/SLC35F6/ALKBH7/TIMM10B/CALM3/OPA1/BLOC1S2/AGK/SLC25A6/DNAJC11/APOO/ACAA2/BID/BNIP3/RHOT1/TIMM8B/GCLC/BCL2L1/ARHGAP11B/TMEM14A/HK2/MTX3/TP53/BNIP3L	54
BP	GO:0002448	mast cell mediated immunity	30/5019	55/18903	9.83782547715863e-06	0.000172810593683935	0.000126144933966806	BLK/IL4R/KIT/RASGRP1/STXBP2/VAMP8/FGR/HMOX1/PIK3CD/SERPINB9/RAC2/PTGDR/LAT/RABGEF1/LYN/FER/C12orf4/SNX4/GATA2/CD300A/RAB44/NDST2/SYK/CBL/SNAP23/PIK3CG/UNC13D/LGALS9/MILR1/NR4A3	30
BP	GO:0002369	T cell cytokine production	23/5019	38/18903	1.07524467164793e-05	0.0001878446565715	0.000137119208343024	GATA3/XCL1/IL6/HFE/SLAMF1/TBX21/SMAD7/SASH3/CD55/TNFRSF1B/LILRB4/IL18/DENND1B/IL18R1/ARG1/IL1B/IL1R1/HLA-F/NLRP3/CCR2/HLA-A/MALT1/ARID5A	23
BP	GO:0002724	regulation of T cell cytokine production	23/5019	38/18903	1.07524467164793e-05	0.0001878446565715	0.000137119208343024	GATA3/XCL1/IL6/HFE/SLAMF1/TBX21/SMAD7/SASH3/CD55/TNFRSF1B/LILRB4/IL18/DENND1B/IL18R1/ARG1/IL1B/IL1R1/HLA-F/NLRP3/CCR2/HLA-A/MALT1/ARID5A	23
BP	GO:0002573	myeloid leukocyte differentiation	87/5019	218/18903	1.09124167953806e-05	0.000190119871906441	0.000138780026016686	CCR7/IL23A/ZFP36L1/CDK6/GATA3/IFNG/KIT/GPR137B/LILRB3/CAMK4/RARA/JUNB/LILRB1/TNF/MMP9/CD101/LEF1/GLO1/PIK3CD/IRF4/ID2/CEACAM1/TGFBR2/PF4/OSCAR/IL15/ZNF675/SPI1/CCR1/HCLS1/SBNO2/LILRB4/NEDD9/PARP1/EVI2B/TFE3/MYH9/FASN/LYN/LTF/BATF/TCIRG1/MAFB/MAPK14/TNFAIP6/TYROBP/CD4/SNX10/FBXW7/HAX1/MYC/IREB2/GATA2/RASSF2/SLC9B2/PDE1B/JAGN1/NOTCH2/TRIB1/VEGFA/CCL3/TLR4/FOS/JUN/F2RL1/PSEN1/PRKCA/CSF1R/PIK3R1/HOXA…	87
BP	GO:0007162	negative regulation of cell adhesion	116/5019	308/18903	1.10806364080717e-05	0.000192526057590246	0.000140536446891847	ADORA2A/IL4R/SOCS6/ZNF703/EPHA4/IL1RN/TGFBI/XCL1/HFE/ABAT/CYP1B1/CD274/GLMN/LILRB1/CRTAM/ZC3H12A/MAPK7/PTPN11/TNFRSF14/PDE5A/LILRB2/TBX21/GTPBP4/SMAD7/BTN2A2/IRF1/YTHDF2/MBP/CEACAM1/TWSG1/SEMA4D/SPI1/NF2/RCC2/AKNA/ABL1/LILRB4/PRKCD/CR1/DUSP1/CTLA4/RUNX3/BCL6/SPN/ZC3H8/MAP2K5/SOCS5/CBFB/AKT1/PAG1/PLXNC1/PDCD1LG2/PLXND1/FCGR2B/METTL3/ARG1/ZBTB7B/HMGB1/CLASP2/ANGPT1/BCAS3/GBP1/DLG1/PRKAR1A/LGALS3/JA…	116
BP	GO:0032757	positive regulation of interleukin-8 production	33/5019	63/18903	1.13629833179535e-05	0.000196896789525731	0.000143726909233507	MYD88/FFAR2/IL6/CD2/TNF/PRKD2/TLR5/TLR1/HSPA1A/TLR8/NOD2/LILRA2/HSPA1B/FCN1/CHI3L1/CD14/BCL10/CLEC7A/RELA/HMGB1/IL1B/MAVS/NOD1/STAT3/TLR7/DDIT3/TLR4/F2RL1/RAB1A/SYK/TLR2/CD244/LGALS9	33
BP	GO:0050672	negative regulation of lymphocyte proliferation	42/5019	87/18903	1.14365310433439e-05	0.000197102909679624	0.000143877368835825	BLK/XCL1/CD274/GLMN/LILRB1/RASSF5/CRTAM/TNFRSF14/PDE5A/LILRB2/BTN2A2/TWSG1/LILRB4/CR1/CTLA4/SPN/LYN/PDCD1LG2/FCGR2B/ARG1/ZBTB7B/TYROBP/DLG1/PRKAR1A/LST1/LGALS9C/IL10/CASP3/MNDA/CD300A/RC3H1/LGALS9B/PELI1/HAVCR2/CD86/ATM/CBLB/PTEN/TNFRSF21/LGALS9/PRNP/PTPN6	42
BP	GO:1900182	positive regulation of protein localization to nucleus	42/5019	87/18903	1.14365310433439e-05	0.000197102909679624	0.000143877368835825	NPM1/BAG3/CCT2/IPO5/IFNG/RAN/CCT6A/CCT4/CCT8/SESN2/CCT7/CCT3/ZC3H12A/DKC1/LIMK2/NMD3/HCLS1/PRKCD/PARP1/HSP90AB1/CCT5/TARDBP/AKT1/EIF2AK3/FYN/MAPK14/EFCAB7/PARP9/MAVS/TRIM28/JUP/CDK5RAP3/TRIM8/PTGS2/CD2AP/PSEN1/SMAD3/PIK3R1/TGFB1/PYHIN1/TFRC/CACNB4	42
BP	GO:2001235	positive regulation of apoptotic signaling pathway	59/5019	135/18903	1.18624314125412e-05	0.000203893511967173	0.000148834241322036	DEDD2/ADORA2A/MAL/LCK/RPL26/TRIM39/RPL11/RBCK1/RPS3/FAF1/TNF/RPS7/PRKRA/BCL2L11/PRKCD/DNM1L/BCL10/RAD9A/TNFSF12/G0S2/SKIL/CTSH/EEF1E1/STK4/SFPQ/CASP2/ITM2C/PLAGL2/TNFSF10/NCK2/STYXL1/RIPK3/FBXW7/S100A8/MYC/NACC2/PEA15/PTPRC/S100A9/SLC9A3R1/BID/CYLD/VNN1/MIR186/DDIT3/FAS/CTNNA1/PTEN/THBS1/NF1/BCLAF1/SOD1/TP53/MAGED1/PDIA3/MCL1/CAV1/INHBA/APAF1	59
BP	GO:0033673	negative regulation of kinase activity	94/5019	240/18903	1.22204041874044e-05	0.000209483282504729	0.000152914553878796	ADORA2A/IPO7/NPM1/DUSP16/IPO5/INPP5K/IFNG/IBTK/PPIA/PIP4K2C/SMPD1/PIK3IP1/SH3BP5/SH3BP5L/HEG1/GADD45B/SMYD3/MVP/CEACAM1/ZNF675/GSTP1/NF2/RGS14/YWHAG/ABL1/LILRB4/CEP85/PIP4K2B/DEPTOR/PRKCD/TFAP4/DUSP1/RGS2/LRP5/SOCS5/SLC8A1/AKT1/SMCR8/CHMP6/PTPN1/LYN/CSK/PAQR3/PTPRJ/IL1B/CDKN1B/MIDN/CAMK2N1/SOCS4/SPRY2/HEXIM1/PRKAR1A/LATS2/STK38/PPP2R5A/PTPRC/COX11/HSPB1/TNFAIP3/KAT2B/CDK5RAP3/PIP4K2A/HHEX/CASP3/C…	94
BP	GO:0045123	cellular extravasation	37/5019	74/18903	1.37893088058418e-05	0.000235116908012141	0.000171626091916078	CD177/EXT1/TNF/PIK3CD/ICAM1/SIRPA/ADAM8/CD99/SELPLG/PLCB1/SPN/ITGAL/CHST2/GP1BA/ITGA4/PECAM1/CX3CR1/FER/ITGA1/SELP/RIPK3/BST1/IL1R1/BCR/CCR2/PTAFR/GCNT1/GOLPH3/SELL/FUT7/PIK3CG/CD47/JAM3/ITGB7/IL27RA/AZU1/ST3GAL4	37
BP	GO:2000628	regulation of miRNA metabolic process	37/5019	74/18903	1.37893088058418e-05	0.000235116908012141	0.000171626091916078	MYB/PPARD/GATA3/GNL3/MIAT/RARA/DROSHA/NR1H2/ZC3H12A/TNF/ETS1/PNPT1/ZNF512B/SMARCA4/SPI1/KLF5/LILRB4/REST/RELA/WT1/ZSWIM8/FOXO3/MYC/GATA2/IL10/STAT3/NFKB1/HIF1A/RC3H1/KLF4/FOS/JUN/SMAD1/SMAD3/TGFB1/TP53/EGR1	37
BP	GO:0062207	regulation of pattern recognition receptor signaling pathway	49/5019	107/18903	1.39426997086989e-05	0.000237100058344204	0.000173073713629258	C1QBP/LILRA4/FCRL3/OASL/SLC15A4/APPL1/SLC15A3/SLC46A2/OTUD4/GPR108/NR1D1/IRF4/NINJ1/IRF1/TLR5/TLR1/FLOT1/HSPA1A/NOD2/LILRA2/HSPA1B/CD14/BIRC3/ANKRD17/ARRB2/PUM2/LYN/LTF/HMGB1/GRAMD4/CD300LF/IFI35/RIOK3/RNF125/TNFAIP3/SLC15A2/CD300A/SMPDL3B/TLR6/GFI1/TLR4/F2RL1/USP15/PELI1/CYBA/CD36/TLR2/PTPN22/CAV1	49
BP	GO:0006188	IMP biosynthetic process	10/5019	11/18903	1.44418883511495e-05	0.000244310558170445	0.000178337094797385	PAICS/ATIC/PPAT/GART/PFAS/APRT/HPRT1/ADSL/AMPD3/AMPD2	10
BP	GO:0006839	mitochondrial transport	77/5019	189/18903	1.44431327789222e-05	0.000244310558170445	0.000178337094797385	BAG3/SLC9A1/HSPA1L/MFN2/GSK3A/CPT1A/TIMM23/TOMM20/MTX2/TIMM50/LMAN1/MTX1/SLC25A5/TIMM13/HUWE1/TIMM9/SAMM50/BCL2L11/TOMM40L/RAC2/TOMM5/TOMM40/CSNK2A2/SLC25A32/HSPA1A/BCS1L/VDAC2/HSPA4/PDCD5/AIFM1/PMPCA/IMMP2L/TMEM14C/LRRK2/GZMB/PPIF/PINK1/TOMM34/TSPO/DNAJC19/MIPEP/MIR29A/SLC25A46/MAPK8/SLC35F6/ALKBH7/TIMM10B/PMPCB/BLOC1S2/FBXW7/IMMP1L/AGK/HAX1/SLC25A6/UBE2D3/TIMM21/UCP2/ACAA2/BID/BNIP3/GRPEL1/SLC2…	77
BP	GO:0002407	dendritic cell chemotaxis	18/5019	27/18903	1.48131823760128e-05	0.000249251284505857	0.000181943630623935	CCR7/C1QBP/CXCR1/CALR/SLAMF1/CXCR2/SLAMF8/SPI1/CCR1/CCR5/HMGB1/CCR6/CCL5/CCR2/CXCR4/PIK3CG/GPR183/LGALS9	18
BP	GO:0009081	branched-chain amino acid metabolic process	18/5019	27/18903	1.48131823760128e-05	0.000249251284505857	0.000181943630623935	SLC25A44/HIBADH/ECHS1/MCCC1/HIBCH/MCCC2/ALDH6A1/BCKDHB/IVD/PCCB/DBT/DLD/BCKDK/AUH/SDSL/ACADSB/ACAT1/BCAT1	18
BP	GO:0032733	positive regulation of interleukin-10 production	24/5019	41/18903	1.54592848864095e-05	0.000258760909852624	0.000188885282960429	IL23A/CD28/CD40LG/XCL1/IL6/CD274/LILRA5/PIBF1/BCL3/IRF4/SASH3/NOD2/CD83/CLEC7A/HMGB1/PLCG2/STAT3/CD34/TLR4/F2RL1/SYK/HGF/TLR2/LGALS9	24
BP	GO:0070232	regulation of T cell apoptotic process	24/5019	41/18903	1.54592848864095e-05	0.000258760909852624	0.000188885282960429	BCL11B/IL7R/CD27/CD274/SLC46A2/BCL3/PRKD2/BCL2L11/ADAM8/ZC3H8/GIMAP8/GPAM/ADA/CCL5/RIPK3/LGALS3/JAK3/KIFAP3/HIF1A/PRELID1/DOCK8/LGALS9/P2RX7/TP53	24
BP	GO:0006275	regulation of DNA replication	59/5019	136/18903	1.55751283689604e-05	0.000259038850422244	0.000189088168640375	ID3/PDS5A/RAD17/STOML2/NUCKS1/S100A11/BLM/ZRANB3/FAF1/RFC3/TSPYL2/GTPBP4/SSBP1/WRNIP1/ACTL6A/TFPT/POLG2/CTC1/MEAF6/POLE3/UCHL5/RUVBL1/ANKRD17/MCM3/BCL6/DHX9/LIG3/MCM4/ACTR5/MCM6/DSCC1/ATR/USP37/GINS2/RFC4/GINS1/CCDC88A/SMC3/RFC5/MCM7/SMARCA5/ACTR8/BRCA2/TTF1/TERF1/TIPIN/INO80C/ORC3/ORC5/ATAD5/GMNN/CDC7/MCM2/PCNA/RUVBL2/CDC6/TP53/MCM5/TICRR	59
BP	GO:1904951	positive regulation of establishment of protein localization	116/5019	310/18903	1.55867652188186e-05	0.000259038850422244	0.000189088168640375	BLK/ADORA2A/PPARD/BAG3/CCT2/IPO5/IFNG/HSPA1L/RAN/CCT6A/CCT4/CCT8/IL1A/GSK3A/XPO4/ABAT/WLS/CCT7/CCT3/PFKFB2/PPIA/NR1H2/ZC3H12A/DKC1/ATP2C1/APBB3/TM7SF3/TNF/CTDSPL2/IER3IP1/VAMP2/ZFAND1/PCM1/CEP290/CENPJ/PLK3/PRKACA/ITGB2/HUWE1/RAC2/CSNK2A2/OAZ2/ADAM8/HCLS1/C1QTNF3/PDCD5/PRKCD/DNM1L/HSP90AB1/GZMB/TM9SF4/SOX4/ANK3/PCNT/C2CD2L/HCAR2/ANG/ITGAM/CCT5/PINK1/TARDBP/TCF7L2/OAZ1/FYN/ARF6/CD38/KCNN4/GOLPH3L/…	116
BP	GO:0009123	nucleoside monophosphate metabolic process	38/5019	77/18903	1.55974284348708e-05	0.000259038850422244	0.000189088168640375	UPP1/UCK2/PAICS/IMPDH2/GMPS/ATIC/CDA/PPAT/UMPS/CARD11/DCTD/GART/AK3/PFAS/APRT/HPRT1/PRPS2/ADSL/DHODH/IMPDH1/UPB1/AMPD3/AMPD2/DUT/CMPK1/AK2/TYMP/NT5C/ADA/TYMS/CAD/AK4/DCK/DLG1/ADK/DPYD/MPP1/CASK	38
BP	GO:0002260	lymphocyte homeostasis	35/5019	69/18903	1.56583453273529e-05	0.000259376839438068	0.000189334887323378	TNFSF14/IL7R/RPS6/SLC46A2/SASH3/BCL2L11/ABL1/LAT/STAT5B/BCL10/MIF/ZC3H8/AKT1/SPNS2/SKIL/GPAM/LYN/ADA/TCIRG1/RIPK3/SLC39A3/JAK3/TNFAIP3/CASP3/HIF1A/TRAF3IP2/RC3H1/FAS/CORO1A/LGALS9/P2RX7/SOS2/TNFSF13B/LGALS2/GAPT	35
BP	GO:2000630	positive regulation of miRNA metabolic process	30/5019	56/18903	1.5825063352762e-05	0.000261461124231422	0.000190856333214054	MYB/GATA3/GNL3/MIAT/NR1H2/ZC3H12A/TNF/ETS1/PNPT1/SMARCA4/SPI1/KLF5/RELA/WT1/ZSWIM8/FOXO3/MYC/GATA2/IL10/STAT3/NFKB1/HIF1A/KLF4/FOS/JUN/SMAD1/SMAD3/TGFB1/TP53/EGR1	30
BP	GO:0032392	DNA geometric change	46/5019	99/18903	1.58827789710596e-05	0.000261738373043698	0.000191058713938356	CHD1L/DDX1/G3BP1/SMARCAD1/CHD9/BLM/ZRANB3/POT1/RFC3/FANCM/SSBP1/WRNIP1/ASCC3/UPF1/WRN/RUVBL1/CHD6/MCM3/DHX9/MCM4/RAD50/XRCC6/MCM6/DSCC1/HMGB1/GINS2/RFC4/GINS1/RFC5/MCM7/CHD4/XRCC5/MNAT1/GTF2H2/CHD2/BRIP1/DDX11/DDX12P/CDC45/MCM2/RUVBL2/RPA1/HMGB3/MCM5/CHD7/TOP2A	46
BP	GO:0044403	biological process involved in symbiotic interaction	115/5019	307/18903	1.6008274328392e-05	0.000263128293202413	0.000192073300966284	CR2/WWP2/PAIP1/MYD88/INPP5K/EIF2AK4/CHMP7/SAP30BP/SLAMF1/PPIA/SMPD1/CCNK/VAMP8/NUCKS1/ZC3H12A/THOC1/RPSA/TNFRSF14/LEF1/CHMP2A/SMARCA4/CD55/PF4/ICAM1/GPR15/IFITM2/IFITM1/DPP4/THOC7/NPC1/CHMP1A/HSPA1A/HSPA1B/ITGB3/FCN1/CHMP4B/LDLR/CR1/SELPLG/TFAP4/HSP90AB1/PGLYRP1/TRIM26/REST/PSMC3/IFITM3/TARDBP/RRP1B/PIKFYVE/CCL4/ANPEP/IGF2R/FASN/CHMP6/ZNF639/LTF/ZDHHC9/SCARB1/CCR5/CHMP3/CX3CR1/SMARCB1/ARG1/HMGB1/…	115
BP	GO:0032945	negative regulation of mononuclear cell proliferation	42/5019	88/18903	1.62969789375254e-05	0.000266712626505222	0.000194689723247807	BLK/XCL1/CD274/GLMN/LILRB1/RASSF5/CRTAM/TNFRSF14/PDE5A/LILRB2/BTN2A2/TWSG1/LILRB4/CR1/CTLA4/SPN/LYN/PDCD1LG2/FCGR2B/ARG1/ZBTB7B/TYROBP/DLG1/PRKAR1A/LST1/LGALS9C/IL10/CASP3/MNDA/CD300A/RC3H1/LGALS9B/PELI1/HAVCR2/CD86/ATM/CBLB/PTEN/TNFRSF21/LGALS9/PRNP/PTPN6	42
BP	GO:0038061	NIK/NF-kappaB signaling	61/5019	142/18903	1.63097649301755e-05	0.000266712626505222	0.000194689723247807	TNFSF14/PPP4C/IL23A/NR3C2/NFKB2/CD27/CALR/MAP3K14/RBCK1/LITAF/ZC3H12A/RPS3/TNF/BCL3/NLRP12/TMSB4X/EDN1/SPI1/NOD2/ILK/C1QTNF3/CHI3L1/ADIPOR1/CD14/BIRC3/IL18/MMP8/AKT1/RELA/SASH1/IL18R1/PHB2/IL1B/RIPK3/IFI35/NOD1/NFKBIA/NLRP3/RASSF2/TNFRSF10A/C1QTNF4/TNFRSF10B/AGO3/TLR6/CYLD/RC3H1/LAPTM5/PRDX1/TLR7/TLR4/MALT1/TRIM44/HAVCR2/CD86/REL/APP/TLR2/LGALS9/PDCD4/PTPN22/MIR27A	61
BP	GO:0045058	T cell selection	28/5019	51/18903	1.64430555605329e-05	0.000268206370546039	0.000195780097624605	CCR7/IL23A/CD28/GATA3/BCL11B/CD3E/IL6/THEMIS/LY9/CD3G/CARD11/IRF4/TBX21/ZAP70/IL15/SPN/SLAMF6/ITPKB/BATF/CD4/CD3D/PTPRC/STAT3/CD1D/STAT6/IL12RB1/SYK/TOX	28
BP	GO:0009112	nucleobase metabolic process	21/5019	34/18903	1.67487657437993e-05	0.000272497730701915	0.000198912621690119	KDM1A/PAICS/CTPS2/GMPS/CDA/PPAT/UMPS/GART/CTPS1/APRT/ALDH6A1/HPRT1/DHODH/CMPK1/TYMP/ADA/TYMS/CAD/MAPK1/ADK/DPYD	21
BP	GO:0046641	positive regulation of alpha-beta T cell proliferation	17/5019	25/18903	1.73372381079922e-05	0.000281356092544422	0.000205378877293181	IL23A/CD28/CD3E/XCL1/CARD11/CD55/TGFBR2/ZAP70/IL18/TYK2/HLA-E/PTPRC/CCR2/HLA-A/SYK/LGALS9/PTPN22	17
BP	GO:0002712	regulation of B cell mediated immunity	33/5019	64/18903	1.75065869054427e-05	0.000282669486548991	0.000206337603239588	CR2/CD28/CD40/XCL1/SLC15A4/MSH2/THOC1/TNF/TBX21/CR1L/CD55/NOD2/CD226/CR1/TP53BP1/BCL6/RIF1/MLH1/FCER2/EXOSC6/FCGR2B/APLF/HLA-E/PTPRC/IL10/ATAD5/STAT6/FCGR1A/TGFB1/TFRC/IL27RA/PTPN6/TNFSF13	33
BP	GO:0002889	regulation of immunoglobulin mediated immune response	33/5019	64/18903	1.75065869054427e-05	0.000282669486548991	0.000206337603239588	CR2/CD28/CD40/XCL1/SLC15A4/MSH2/THOC1/TNF/TBX21/CR1L/CD55/NOD2/CD226/CR1/TP53BP1/BCL6/RIF1/MLH1/FCER2/EXOSC6/FCGR2B/APLF/HLA-E/PTPRC/IL10/ATAD5/STAT6/FCGR1A/TGFB1/TFRC/IL27RA/PTPN6/TNFSF13	33
BP	GO:0019882	antigen processing and presentation	49/5019	108/18903	1.89933127334582e-05	0.000305902371833077	0.000223296695373601	CCR7/HLA-DOB/EXT1/SLC11A1/DNM2/TAPBP/HFE/CALR/RAB4A/WAS/CLEC4A/LILRB2/RAB8B/TAP1/CD8A/RAB35/ICAM1/NOD2/CTSH/PIKFYVE/FCGR2B/FCER1G/MR1/TAP2/HLA-E/HLA-F/CTSD/NOD1/CTSS/IFI30/HLA-A/PSMB8/HLA-B/HLA-C/LGMN/CD1D/CD68/FCGR1A/IDE/HLA-H/FGL2/THBS1/ARL8B/TAPBPL/ERAP1/MFSD6/WDFY4/PDIA3/CD1C	49
BP	GO:0000462	maturation of SSU-rRNA from tricistronic rRNA transcript (SSU-rRNA, 5.8S rRNA, LSU-rRNA)	23/5019	39/18903	1.96285198609892e-05	0.000315338582892374	0.000230184758168807	RPS19/TSR1/WDR43/DCAF13/HEATR1/RPS21/NOP14/RPS8/RPP40/BMS1/UTP6/MRPS11/UTP3/NOL10/UTP20/NGDN/DHX37/KRI1/RPS16/BYSL/RCL1/RPS14/RRS1	23
BP	GO:0071347	cellular response to interleukin-1	50/5019	111/18903	1.9956789776081e-05	0.000319808806587122	0.000233447845580116	MAPK13/XCL2/MYD88/CD40/ZBP1/IL1RN/XCL1/IL6/HES1/ZC3H12A/OTUD4/IRAK2/BMI1/MAPK3/NR1D1/RORA/SIRPA/EDN1/ZNF675/UPF1/CCL20/PLCB1/RBMX/USP10/RELA/CCL4/IL1B/CCL5/KMO/IL1R1/GBP1/CCL4L1/GBP2/KLF2/HYAL3/NFKB1/TANK/HIF1A/IRAK4/RC3H1/CCL3/MMP2/CCL3L3/IL1R2/CD47/CCL23/CAMP/EGR1/MIR27A/CCL1	50
BP	GO:0002279	mast cell activation involved in immune response	29/5019	54/18903	2.05284210190194e-05	0.000327556172720351	0.00023910311802875	BLK/IL4R/KIT/RASGRP1/STXBP2/VAMP8/FGR/HMOX1/PIK3CD/RAC2/PTGDR/LAT/RABGEF1/LYN/FER/C12orf4/SNX4/GATA2/CD300A/RAB44/SYK/CBL/SNAP23/PIK3CG/UNC13D/LGALS9/MILR1/PTPN6/NR4A3	29
BP	GO:0002690	positive regulation of leukocyte chemotaxis	45/5019	97/18903	2.05427002284737e-05	0.000327556172720351	0.00023910311802875	CCR7/TNFSF14/C1QBP/IL23A/FPR2/XCL2/GPSM3/XCL1/IL6/CALR/SLAMF1/CXCR2/MAPK3/CMKLR1/RAC2/EDN1/SPI1/CCR1/CREB3/C5AR1/NEDD9/DNM1L/DAPK2/PLA2G7/PTK2B/CCL4/CX3CR1/HMGB1/OXSR1/MAPK1/CCR6/CCL5/MCU/CCR2/VEGFA/LGMN/CCL3/MOSPD2/WNK1/F2RL1/CSF1R/THBS1/LGALS9/CSF1/CCL1	45
BP	GO:0009126	purine nucleoside monophosphate metabolic process	25/5019	44/18903	2.10548842283285e-05	0.000332407233965266	0.000242644201867209	PAICS/IMPDH2/GMPS/ATIC/PPAT/CARD11/GART/AK3/PFAS/APRT/HPRT1/PRPS2/ADSL/IMPDH1/AMPD3/AMPD2/AK2/NT5C/ADA/AK4/DCK/DLG1/ADK/MPP1/CASK	25
BP	GO:0032689	negative regulation of interferon-gamma production	25/5019	44/18903	2.10548842283285e-05	0.000332407233965266	0.000242644201867209	C1QBP/GATA3/XCL1/CD274/SLAMF1/RARA/LILRB1/ZC3H12A/NOD2/LILRB4/CR1/PGLYRP1/PDCD1LG2/HMGB1/LGALS9C/IL10/LAPTM5/LGALS9B/DDIT3/TLR4/HAVCR2/LGALS9/PRNP/IL1RL1/INHBA	25
BP	GO:0072538	T-helper 17 type immune response	25/5019	44/18903	2.10548842283285e-05	0.000332407233965266	0.000242644201867209	IL23A/NFKBID/IL6/JUNB/ZC3H12A/CLEC6A/LY9/IRF4/TBX21/RORA/SMAD7/SLAMF6/CLEC7A/BATF/TYK2/ZBTB7B/NFKBIZ/IL17RA/STAT3/TRAF3IP2/RC3H1/MALT1/IL12RB1/ARID5A/IL27RA	25
BP	GO:1904407	positive regulation of nitric oxide metabolic process	25/5019	44/18903	2.10548842283285e-05	0.000332407233965266	0.000242644201867209	IFNG/DNM2/PKD2/TNF/EDN1/SOD2/HSP90AB1/CLU/MMP8/AKT1/CLEC7A/PTK2B/MIR181B1/IL1B/KLF2/TMEM106A/TLR6/PTX3/KLF4/PTGS2/TLR4/INSR/SMAD3/CD36/ASS1	25
BP	GO:0033077	T cell differentiation in thymus	41/5019	86/18903	2.11502891157321e-05	0.000333091006418698	0.000243143328854437	CCR7/ZFP36L1/CDK6/CD28/GATA3/BCL11B/CD3E/IL7R/IL1A/RASGRP1/RPS6/CAMK4/PRKDC/TNFRSF9/CD3G/CLPTM1/BMI1/JMJD6/CARD11/ZAP70/ADAM8/ABL1/STAT5B/ZC3H8/ITPKB/EGR3/ADA/MAFB/CCR6/IL1B/CD3D/MR1/RIPK3/PTPRC/VNN1/IL2RG/ZFP36L2/SOD1/SOS2/TP53/TOX	41
BP	GO:0009083	branched-chain amino acid catabolic process	15/5019	21/18903	2.22821423353285e-05	0.000350054098506365	0.000255525718646959	SLC25A44/HIBADH/ECHS1/MCCC1/HIBCH/MCCC2/ALDH6A1/BCKDHB/IVD/DBT/DLD/BCKDK/AUH/ACADSB/ACAT1	15
BP	GO:0046824	positive regulation of nucleocytoplasmic transport	32/5019	62/18903	2.27835028249804e-05	0.000357053228095404	0.000260634807858522	BAG3/IPO5/IFNG/RAN/XPO4/ZC3H12A/NCBP2/CTDSPL2/PRKACA/HCLS1/KHDRBS1/PRKCD/HSP90AB1/DHX9/TARDBP/TCF7L2/MAPK14/IL1B/EFCAB7/ANP32B/CPSF6/MAVS/TRIM28/RIOK2/YWHAE/JUP/PTGS2/PSEN1/SMAD3/PIK3R1/TGFB1/NEDD4	32
BP	GO:0001933	negative regulation of protein phosphorylation	124/5019	338/18903	2.37517890924009e-05	0.000368855154858261	0.000269249750035647	ADORA2A/IPO7/NPM1/DUSP16/IPO5/INPP5K/IFNG/IBTK/PRKDC/PPIA/SNX25/SMPD1/ZC3H12A/PIBF1/PWP1/SH3BP5/SMAD7/NLRP12/SH3BP5L/HEG1/GADD45B/SMYD3/MVP/CEACAM1/IMPACT/SIRPA/ZNF675/SEMA4D/GSTP1/SOCS3/NF2/RGS14/YWHAG/ABL1/LILRB4/CEP85/DEPTOR/PRKCD/RABGEF1/TFAP4/DUSP1/LRRK2/RGS2/LRP5/ARRB2/SOCS5/SLC8A1/TARDBP/AKT1/SMCR8/DNAJC10/CHMP6/PTPN1/LYN/PAQR3/TMED2/LRP1/CALM3/PTPRJ/IL1B/ANGPT1/CDKN1B/NCK2/C9orf72/CAMK2N1…	124
BP	GO:0000054	ribosomal subunit export from nucleus	12/5019	15/18903	2.38827078685205e-05	0.000368855154858261	0.000269249750035647	XPO1/NPM1/ABCE1/RAN/LTV1/NMD3/MDN1/SDAD1/RIOK2/LSG1/RRS1/NUP88	12
BP	GO:0006206	pyrimidine nucleobase metabolic process	12/5019	15/18903	2.38827078685205e-05	0.000368855154858261	0.000269249750035647	CTPS2/CDA/UMPS/CTPS1/ALDH6A1/DHODH/CMPK1/TYMP/TYMS/CAD/MAPK1/DPYD	12
BP	GO:0006271	DNA strand elongation involved in DNA replication	12/5019	15/18903	2.38827078685205e-05	0.000368855154858261	0.000269249750035647	RFC3/POLA1/POLE3/MCM3/LIG3/POLD2/MCM4/RFC4/GINS1/MCM7/PCNA/POLE	12
BP	GO:0033750	ribosome localization	12/5019	15/18903	2.38827078685205e-05	0.000368855154858261	0.000269249750035647	XPO1/NPM1/ABCE1/RAN/LTV1/NMD3/MDN1/SDAD1/RIOK2/LSG1/RRS1/NUP88	12
BP	GO:1902563	regulation of neutrophil activation	12/5019	15/18903	2.38827078685205e-05	0.000368855154858261	0.000269249750035647	CD177/TNF/ITGB2/SPI1/ITGAM/GRN/FCGR2B/BCR/PTAFR/CD300A/SYK/PRAM1	12
BP	GO:0002283	neutrophil activation involved in immune response	14/5019	19/18903	2.41057052295226e-05	0.000369620813519346	0.000269808650732558	CD177/MYD88/STXBP2/ITGB2/SPI1/LILRA2/ITGAM/ANXA3/FCER1G/TYROBP/BCR/PTAFR/SYK/PRAM1	14
BP	GO:0045953	negative regulation of natural killer cell mediated cytotoxicity	14/5019	19/18903	2.41057052295226e-05	0.000369620813519346	0.000269808650732558	KIR2DL4/LILRB1/KLRD1/KLRC1/SERPINB9/CEACAM1/ARRB2/HLA-E/HLA-F/HLA-A/HLA-B/HAVCR2/CLEC12B/LGALS9	14
BP	GO:2001185	regulation of CD8-positive, alpha-beta T cell activation	14/5019	19/18903	2.41057052295226e-05	0.000369620813519346	0.000269808650732558	XCL1/HFE/CD274/LILRB1/CRTAM/IRF1/LILRB4/RUNX3/CBFB/ZBTB7B/HLA-E/HLA-A/SH3RF1/PTPN22	14
BP	GO:0090305	nucleic acid phosphodiester bond hydrolysis	97/5019	253/18903	2.47517014506592e-05	0.000378618131759606	0.000276376339038587	N4BP1/DDX1/G3BP1/APEX1/NOB1/TSR1/TSN/USB1/RPS21/POP5/EXOSC2/DROSHA/NOP14/ZC3H12A/NHP2/CPSF3/DIS3/SETMAR/RNASEH2A/RPP40/FAN1/BMS1/NCBP2/ZRANB3/SND1/PNPT1/PARN/EXOSC8/NCBP1/FANCM/NUDT21/RAD1/ISG20/CNOT7/RPP30/ERI2/ZC3H12D/ERN1/DIS3L/HORMAD1/ERCC1/ISG20L2/WRN/TSEN2/ZFP36/EXOSC5/UTP20/RAD9A/PAN3/POLR2I/TATDN1/RAD50/ANG/CSTF3/POLR3K/DCP1B/KRI1/N4BP2/LAS1L/CNOT2/EXOSC10/TDP1/RNASEK/RMRP/PMS2/NOL9/PLSCR…	97
BP	GO:0038066	p38MAPK cascade	30/5019	57/18903	2.49558690785704e-05	0.000379923397353284	0.000277329131564866	GADD45G/ZFP36L1/MINK1/ZC3H12A/PRMT1/MAP2K3/GADD45B/MAP3K3/SPI1/MAP2K6/PHLPP1/ZFP36/DUSP1/SASH1/MIR181B1/NCF1/MAPK14/IL1B/DLG1/EZR/ULK4/VEGFA/CYLD/MIR20A/GADD45A/HGF/LGALS9/DUSP10/PTPN22/MAP3K5	30
BP	GO:0045071	negative regulation of viral genome replication	30/5019	57/18903	2.49558690785704e-05	0.000379923397353284	0.000277329131564866	N4BP1/INPP5K/TNIP1/OASL/ZNFX1/TNF/ISG20/IFITM2/IFITM1/APOBEC3A/IFITM3/LTF/APOBEC3B/SRPK2/CCL5/PLSCR1/OAS1/ILF3/APOBEC3G/MAVS/TRIM28/RNASEL/SLPI/MX1/TRIM6/IFIT1/OAS3/IFIH1/OAS2/SRPK1	30
BP	GO:0002825	regulation of T-helper 1 type immune response	19/5019	30/18903	2.55290444667396e-05	0.000387726152779889	0.000283024836018311	IL4R/IL23A/SLC11A1/XCL1/SLAMF1/TBX21/IL18/SOCS5/IL18R1/IL1B/IL1R1/JAK3/CCR2/IL12RB1/HAVCR2/ARID5A/HLX/IL27RA/IL1RL1	19
BP	GO:0031348	negative regulation of defense response	103/5019	272/18903	2.58304646988767e-05	0.000391374386930374	0.000285687903404388	C1QBP/ADORA2A/PPARD/GATA3/FPR2/RPS19/KIR2DL4/CYP19A1/NR1H2/LILRB1/SIGLEC10/KLRD1/MAPK7/MICB/ZDHHC18/FGR/TRAFD1/SLAMF8/RHBDF2/NR1D1/MEFV/RORA/NLRC5/NLRP12/KLRC1/SERPINB9/YTHDF2/ALOX5/CNOT7/PSMA1/CEACAM1/SIRPA/TNFRSF1B/GSTP1/SOCS3/NOD2/C1QTNF3/ZFP36/LDLR/PRKCD/CR1/PARP1/RABGEF1/HCK/PGLYRP1/ARRB2/SOCS5/GRN/LYN/FYN/FCGR2B/METTL3/MIR181B1/ADA/ARG1/PLCG1/MAPK14/TRIM21/TNFAIP6/AOAH/OAS1/PLK2/MIR142/HLA-…	103
BP	GO:0043303	mast cell degranulation	28/5019	52/18903	2.66307598725428e-05	0.000402546285165576	0.000293842949545489	BLK/IL4R/KIT/RASGRP1/STXBP2/VAMP8/FGR/HMOX1/PIK3CD/RAC2/PTGDR/LAT/RABGEF1/LYN/FER/C12orf4/SNX4/GATA2/CD300A/RAB44/SYK/CBL/SNAP23/PIK3CG/UNC13D/LGALS9/MILR1/NR4A3	28
BP	GO:0009167	purine ribonucleoside monophosphate metabolic process	24/5019	42/18903	2.70062153438524e-05	0.000406300566843747	0.000296583427454221	PAICS/IMPDH2/GMPS/ATIC/PPAT/CARD11/GART/AK3/PFAS/APRT/HPRT1/PRPS2/ADSL/IMPDH1/AMPD3/AMPD2/AK2/NT5C/ADA/AK4/DLG1/ADK/MPP1/CASK	24
BP	GO:0045429	positive regulation of nitric oxide biosynthetic process	24/5019	42/18903	2.70062153438524e-05	0.000406300566843747	0.000296583427454221	IFNG/DNM2/PKD2/TNF/EDN1/SOD2/HSP90AB1/CLU/MMP8/AKT1/CLEC7A/PTK2B/MIR181B1/IL1B/KLF2/TLR6/PTX3/KLF4/PTGS2/TLR4/INSR/SMAD3/CD36/ASS1	24
BP	GO:0070302	regulation of stress-activated protein kinase signaling cascade	79/5019	198/18903	2.73126497374614e-05	0.000409946202866968	0.000299244598309622	TRAF1/CCR7/GADD45G/DUSP16/MYD88/IL1A/MINK1/CD27/RASGRP1/SLAMF1/PPIA/ZC3H12A/TNF/PRMT1/MAPK3/FKTN/MBIP/GADD45B/ZMYND11/MAP3K3/SIRPA/ZNF675/SPI1/GSTP1/NOD2/EPHB1/PHLPP1/FOXO1/DUSP1/PLCB1/RNF13/MAP3K11/KLHDC10/PINK1/MMP8/PTK2B/SASH1/LYN/FCGR2B/TRAF3/MIR181B1/HMGB1/NCF1/MAPK1/IL1B/SCIMP/MAP2K1/SDCBP/IGBP1/DLG1/NOD1/NBR1/MYC/NAIP/RASSF2/EZR/ULK4/VEGFA/SH3RF1/CYLD/PRDX1/TAOK3/TLR4/FAS/EDA2R/F2RL1/MIR20…	79
BP	GO:0032418	lysosome localization	40/5019	84/18903	2.74527206594613e-05	0.000410123121253727	0.000299373741770908	BLK/IL4R/KIT/RASGRP1/STXBP2/VAMP8/DEF8/PLEKHM1/FGR/RAB3A/KXD1/HMOX1/PIK3CD/TFEB/RAC2/PTGDR/LAT/RABGEF1/MYH9/FAM98A/NDEL1/LYN/FER/C12orf4/SNX4/BLOC1S2/BLOC1S1/GATA2/CD300A/RAB44/PLEKHM2/SYK/CBL/SNAP23/PIK3CG/ARL8B/UNC13D/LGALS9/MILR1/NR4A3	40
BP	GO:1990849	vacuolar localization	40/5019	84/18903	2.74527206594613e-05	0.000410123121253727	0.000299373741770908	BLK/IL4R/KIT/RASGRP1/STXBP2/VAMP8/DEF8/PLEKHM1/FGR/RAB3A/KXD1/HMOX1/PIK3CD/TFEB/RAC2/PTGDR/LAT/RABGEF1/MYH9/FAM98A/NDEL1/LYN/FER/C12orf4/SNX4/BLOC1S2/BLOC1S1/GATA2/CD300A/RAB44/PLEKHM2/SYK/CBL/SNAP23/PIK3CG/ARL8B/UNC13D/LGALS9/MILR1/NR4A3	40
BP	GO:0010821	regulation of mitochondrion organization	63/5019	150/18903	2.79156539177033e-05	0.000416066879137051	0.000303712451162057	SIRT7/GSK3A/STOML2/MMP9/TMEM135/SSBP1/SLC25A5/HUWE1/FAM162A/BCL2L11/CSNK2A2/TRIAP1/HSPA1A/PDCD5/VDAC1/DNM1L/LRRK2/GZMB/FXN/DDHD2/CLU/PPIF/ARRB2/PINK1/AKT1/RAP1GDS1/PGAM5/TSPO/PLAUR/OMA1/MAPK8/SLC35F6/CTTN/OPA1/RALA/PLSCR3/TNFSF10/FBXW7/MCU/HAX1/SLC25A6/CIDEB/VPS13C/ACAA2/GOLPH3/BID/BNIP3/HIF1A/RHOT1/MLLT11/CAMKK2/MTCH2/GCLC/PRELID1/STAT2/BCL2L1/TFRC/TMEM14A/LMNA/HGF/TP53/BNIP3L/VAT1	63
BP	GO:0046686	response to cadmium ion	31/5019	60/18903	2.96596288950286e-05	0.000440008508479844	0.000321188898572614	KIT/MMP9/MAPK3/HMOX1/MTF1/NPC1/ERCC1/SOD2/AKT1/SORD/ARG1/MAPK8/NCF1/MAPK1/SLC30A1/CDKN1B/CAT/AKR1C3/CYBB/GSS/HESX1/FOS/JUN/GCLC/PCNA/ALAD/MT1B/MT1F/SOD1/PRNP/MT1X	31
BP	GO:1905517	macrophage migration	31/5019	60/18903	2.96596288950286e-05	0.000440008508479844	0.000321188898572614	CYP19A1/CNN2/SLAMF1/SLAMF8/MAPK3/CMKLR1/C5/C5AR1/B4GALT1/MIF/MIR128-1/PTK2B/CX3CR1/MAPK1/CCL5/BCR/LGALS3/CCR2/P2RY12/CCL3/CKLF/MMP2/CSF1R/THBS1/MCOLN2/CD200/CSF1/CD200R1/AZU1/STAP1/CD9	31
BP	GO:1990823	response to leukemia inhibitory factor	46/5019	101/18903	2.99423537971437e-05	0.000443174560599391	0.000323499992048088	EXT1/SPOCK2/PADI2/NCL/PRDM5/UBXN2A/MRPL15/SMAD7/ICAM1/SOCS3/KLF5/SBNO2/MSC/RIF1/MTF2/MAT2A/NUP35/KDM5B/BSPRY/PFKP/EEF1E1/WDR35/NFYB/RPS16/SRM/SNX10/SPRY2/SMARCA5/XRCC5/RNF125/CACYBP/TRIM25/SYNGR1/ARID5B/HELLS/KLF4/PCOLCE2/GCLM/TLE4/PIGA/TFRC/SRSF3/CACNB4/BCLAF1/HK2/MYBL2	46
BP	GO:2000515	negative regulation of CD4-positive, alpha-beta T cell activation	21/5019	35/18903	3.13993980940329e-05	0.000463666862386251	0.000338458566060391	IL4R/XCL1/CD274/ZC3H12A/TBX21/SMAD7/TWSG1/RUNX3/BCL6/SOCS5/CBFB/ZBTB7B/HMGB1/JAK3/LGALS9C/RC3H1/LGALS9B/CBLB/TARM1/HLX/LGALS9	21
BP	GO:0006626	protein targeting to mitochondrion	47/5019	104/18903	3.15288678151161e-05	0.00046450594656648	0.000339071064497271	BAG3/HSPA1L/MFN2/GSK3A/TIMM23/TOMM20/MTX2/TIMM50/LMAN1/MTX1/TIMM13/HUWE1/TIMM9/SAMM50/TOMM40L/RAC2/TOMM5/TOMM40/CSNK2A2/HSPA4/PDCD5/AIFM1/PMPCA/IMMP2L/LRRK2/PINK1/TOMM34/TSPO/DNAJC19/MIPEP/TIMM10B/PMPCB/FBXW7/IMMP1L/AGK/HAX1/UBE2D3/TIMM21/BID/GRPEL1/AIP/TIMM8B/PITRM1/HPS4/PRKAA1/BNIP3L/RHOU	47
BP	GO:0070098	chemokine-mediated signaling pathway	42/5019	90/18903	3.21173700728087e-05	0.000472088423552963	0.000344605974356525	CCR7/CCRL2/XCL2/CXCR1/CXCR3/PADI2/XCL1/CXCR5/CXCR2/CXCR6/CMKLR1/CXCL5/CCR3/PF4/EDN1/PF4V1/CCR1/CCL20/PPBP/PTK2B/CCL4/CCR4/CXCL1/LYN/CCR5/CX3CR1/OXSR1/CCR6/CCL5/CCL4L1/CCR2/CXCR4/HIF1A/CCL3/WNK1/SH2B3/CCL3L3/CXCL9/CXCL2/CCL23/FOXC1/CCL1	42
BP	GO:1903008	organelle disassembly	59/5019	139/18903	3.41247025313071e-05	0.000500443458681599	0.000365304034340453	MFN2/WDR45/GSK3A/EIF2D/WIPI1/UBA5/ZFAND1/ATG9A/DENR/PLK3/SLC25A5/HUWE1/CSNK2A2/ASCC3/NEDD9/UFC1/VDAC1/DNM1L/VCP/GFM2/GABARAP/MTIF2/MAP1LC3B/PINK1/PNPLA2/GABARAPL1/TSPO/MAP1LC3B2/ATG2A/MRRF/PHB2/SLC25A46/CTTN/ULK1/CISD2/FUNDC1/UFM1/FBXW7/HAX1/GABARAPL2/OGT/VPS13C/LRBA/MTIF3/PELO/BNIP3/HIF1A/OPTN/ATG7/CAMKK2/ATG14/PRKAA1/UFL1/PLIN3/ATG3/HK2/TP53/BNIP3L/ULK2	59
BP	GO:0032508	DNA duplex unwinding	43/5019	93/18903	3.43648377321403e-05	0.000502811836291316	0.000367032856809129	CHD1L/DDX1/G3BP1/SMARCAD1/CHD9/BLM/POT1/RFC3/FANCM/SSBP1/WRNIP1/ASCC3/UPF1/WRN/RUVBL1/CHD6/MCM3/DHX9/MCM4/RAD50/XRCC6/MCM6/DSCC1/GINS2/RFC4/GINS1/RFC5/MCM7/CHD4/XRCC5/MNAT1/GTF2H2/CHD2/BRIP1/DDX11/DDX12P/CDC45/MCM2/RUVBL2/RPA1/MCM5/CHD7/TOP2A	43
BP	GO:0000045	autophagosome assembly	49/5019	110/18903	3.44696620914678e-05	0.000503194108248505	0.000367311900296968	BAG3/MFN2/WDR45/PIP4K2C/SNX18/WIPI1/UBXN2A/ATG9A/RAB19/MTMR3/TOM1/CHMP4B/PIP4K2B/LRRK2/GABARAP/MAP1LC3B/PINK1/GABARAPL1/SMCR8/PIKFYVE/ATG16L1/MAP1LC3B2/ATG2A/RNF5/TCIRG1/RALB/ULK1/SNX4/C9orf72/CTSD/GABARAPL2/IFT88/LRBA/RAB1B/UBXN2B/PIP4K2A/ATG7/IRGM/RAB7A/PSEN1/ATG14/RAB1A/STX12/UBQLN2/ATG16L2/ATG3/TBC1D12/TP53INP2/ULK2	49
BP	GO:0050920	regulation of chemotaxis	89/5019	230/18903	3.50780121950243e-05	0.000510908450968075	0.000372943066952973	CCR7/SEMA4B/TNFSF14/C1QBP/IL23A/FPR2/XCL2/GPR18/PADI2/CYP19A1/GPSM3/XCL1/C5AR2/IL6/SEMA4A/CALR/SLAMF1/SEMA6B/CXCR2/SLAMF8/MAPK3/CMKLR1/S1PR1/PRKD2/C5/TMSB4X/RAC2/IL16/EDN1/SEMA4D/SPI1/DPP4/CCR1/NOD2/CREB3/C5AR1/ST6GAL1/NEDD9/DNM1L/RIN3/DUSP1/DAPK2/STX3/MIF/PLA2G7/USP14/PTK2B/CCL4/CCR4/LYN/SUCNR1/CX3CR1/MYCBP2/HMGB1/SEMA3C/TNFAIP6/OXSR1/MAPK1/CCR6/CCL5/BST1/MCU/CCR2/HSPB1/CXCR4/VEGFA/LGMN/P2RY12/C…	89
BP	GO:0007229	integrin-mediated signaling pathway	50/5019	113/18903	3.58145529566124e-05	0.000518205785243331	0.000378269833852284	CD177/CD40LG/TEC/VAV1/NME2/PTPN11/FGR/ITGB2/ZYX/CEACAM1/FERMT3/ITGAX/CCM2/ILK/RCC2/ITGB3/ABL1/LAT/NEDD9/MIR92B/HCK/ITGAL/MYH9/ITGAM/PTK2B/ITGA4/ITGA1/ADAM9/TIMP1/BST1/ITGA7/FUT8/ITGA9/TLN1/PLEK/ITGA2B/CD63/CTNNA1/SYK/TXK/CD47/ITGB7/PRAM1/SEMA7A/LAMB2/ITGB8/ITGAE/FERMT1/VAV3/ITGA5	50
BP	GO:0000723	telomere maintenance	64/5019	154/18903	3.58221703280501e-05	0.000518205785243331	0.000378269833852284	CCT2/GNL3/CCT6A/CCT4/CCT8/APEX1/HNRNPA1/CCT7/CCT3/MAPKAPK5/PRKDC/NHP2/DKC1/BLM/NAT10/POT1/MAPK3/PARN/ACTL6A/TFPT/CTC1/ERCC1/UPF1/UCHL5/YLPM1/WRN/HDAC8/RUVBL1/TINF2/PARP1/HSP90AB1/RIF1/HNRNPC/NSMCE4A/RAD50/CCT5/XRCC6/HNRNPD/PTGES3/NSMCE1/NAF1/ATR/TERF2/EXOSC10/SMC5/MAPK1/DCLRE1A/XRCC5/SP100/ACTR8/MYC/BRCA2/TERF1/TFIP11/TNKS/NOP10/RAD51C/DCLRE1C/FEN1/PCNA/RUVBL2/ATM/RPA1/CCNE2	64
BP	GO:0008360	regulation of cell shape	64/5019	154/18903	3.58221703280501e-05	0.000518205785243331	0.000378269833852284	KIT/SEMA4A/FGD3/WDR1/RHOF/MYO10/FGR/TBCCD1/WDPCP/ITGB2/CDC42EP3/RAC2/SEMA4D/RHOG/CDC42SE1/CFDP1/HCK/ARAP3/MYH9/PTK2B/PLXNC1/BRWD1/FYN/PLXND1/MYL12B/ARAP1/RHOBTB3/FGD2/ARHGAP35/MSN/DLG1/LST1/LIMD1/RHOB/RHOQ/PRPF40A/ITGA7/EZR/SLC9A3R1/EPB41L3/FMNL1/VEGFA/FGD4/RDX/DNMBP/FMNL3/CCL3/DLC1/PHIP/SH3KBP1/LPAR1/CSF1R/MYL12A/ERMN/CORO1A/RHOH/P2RY1/RHOBTB1/FGD6/ARHGAP18/EPB42/EPB41/RHOU/HEXB	64
BP	GO:0050857	positive regulation of antigen receptor-mediated signaling pathway	17/5019	26/18903	3.76678573417915e-05	0.000543675575267302	0.000396861778432941	CCR7/LCK/RPS3/CARD11/PRKD2/SLC39A10/CD226/BCL10/RELA/ADA/KCNN4/NFAM1/PRKCH/PTPRC/PRKCB/TRAT1/STAP1	17
BP	GO:0045577	regulation of B cell differentiation	20/5019	33/18903	3.95191959794456e-05	0.000569112024983277	0.000415429385900573	ZFP36L1/FCRL3/CD27/IKZF3/XBP1/SLAMF8/CARD11/ID2/STAT5B/CR1/BCL6/NFAM1/PCID2/IL10/IL2RG/ZFP36L2/SYK/HMGB3/PTPN6/INHBA	20
BP	GO:0071214	cellular response to abiotic stimulus	122/5019	335/18903	4.02332750284925e-05	0.000576797220924173	0.000421039276554958	TNFSF14/MAPK13/N4BP1/NPM1/ZFP36L1/BAG3/RPL26/GATA3/MYD88/CD40/SLC9A1/EIF2AK4/KDM1A/DNM2/SLC24A4/CNN2/CALR/MAP3K14/PKD2/SMPD1/LETM1/NUCKS1/CASP5/BLM/KCNJ2/MMP9/MAPK3/RAD1/IRF1/TLR5/INTS7/IMPACT/TRIAP1/GRB2/ERCC1/PIEZO1/TLR8/WRN/ITGB3/MICU1/EIF2S1/MLST8/PRKCD/CARD16/PARP1/TP53BP1/BCL10/MME/RAD9A/ACTR5/REST/XRCC6/MAP3K2/TSPO/CASP2/METTL3/ATR/KCNE1/MAPK8/CHEK1/MAPK14/OXSR1/NET1/IL1B/CREBBP/TIMP1/CASP…	122
BP	GO:0104004	cellular response to environmental stimulus	122/5019	335/18903	4.02332750284925e-05	0.000576797220924173	0.000421039276554958	TNFSF14/MAPK13/N4BP1/NPM1/ZFP36L1/BAG3/RPL26/GATA3/MYD88/CD40/SLC9A1/EIF2AK4/KDM1A/DNM2/SLC24A4/CNN2/CALR/MAP3K14/PKD2/SMPD1/LETM1/NUCKS1/CASP5/BLM/KCNJ2/MMP9/MAPK3/RAD1/IRF1/TLR5/INTS7/IMPACT/TRIAP1/GRB2/ERCC1/PIEZO1/TLR8/WRN/ITGB3/MICU1/EIF2S1/MLST8/PRKCD/CARD16/PARP1/TP53BP1/BCL10/MME/RAD9A/ACTR5/REST/XRCC6/MAP3K2/TSPO/CASP2/METTL3/ATR/KCNE1/MAPK8/CHEK1/MAPK14/OXSR1/NET1/IL1B/CREBBP/TIMP1/CASP…	122
BP	GO:0046638	positive regulation of alpha-beta T cell differentiation	28/5019	53/18903	4.22107975400447e-05	0.000603793824320012	0.000440745734822932	MYB/IL4R/IL23A/NFKBID/IFNG/RARA/SASH3/TGFBR2/ZAP70/LILRB4/RUNX3/IL18/CD83/SOCS5/CBFB/ITPKB/ADA/ZBTB7B/NFKBIZ/NLRP3/ZBTB16/IL2RG/MALT1/IL12RB1/CD86/SYK/HLX/LGALS9	28
BP	GO:0045824	negative regulation of innate immune response	37/5019	77/18903	4.23405706155591e-05	0.000604298233294386	0.0004411139335277	RPS19/KIR2DL4/NR1H2/LILRB1/KLRD1/ZDHHC18/TRAFD1/SLAMF8/NLRC5/KLRC1/SERPINB9/YTHDF2/CNOT7/CEACAM1/CR1/PARP1/ARRB2/GRN/METTL3/MIR181B1/ARG1/TRIM21/OAS1/HLA-E/HLA-F/HLA-A/TNFAIP3/HLA-B/TTLL12/OAS3/USP15/HAVCR2/CLEC12B/STAT2/LGALS9/DUSP10/SAMHD1	37
BP	GO:0006270	DNA replication initiation	22/5019	38/18903	4.42619764085302e-05	0.00062773000468181	0.000458218204691758	PRIM2/POLA1/WRNIP1/MCM3/MCM4/PRIM1/MCM6/NOC3L/ORC2/MCM7/ORC4/ORC3/ORC5/GMNN/CDC45/MCM2/TOPBP1/MCM10/CDC6/MCM5/TICRR/CCNE2	22
BP	GO:0042092	type 2 immune response	22/5019	38/18903	4.42619764085302e-05	0.00062773000468181	0.000458218204691758	IL4R/GATA3/XCL1/IL6/RARA/BCL3/TBX21/NOD2/BCL6/IL18/SOCS5/DENND1B/BATF/ARG1/NLRP3/CCR2/IL10/TRAF3IP2/STAT6/CD86/HLX/IL27RA	22
BP	GO:0008637	apoptotic mitochondrial changes	48/5019	108/18903	4.42768583220983e-05	0.00062773000468181	0.000458218204691758	GSK3A/TIMM50/MMP9/SLC25A5/FAM162A/BCL2L11/TRIAP1/HSPA1A/VDAC2/NDUFS1/PDCD5/GGCT/DNM1L/SOD2/GZMB/FXN/CLU/PPIF/ARRB2/PINK1/AKT1/IFIT2/PLAUR/MIR29A/MAPK8/SLC35F6/OPA1/PLSCR3/TNFSF10/BLOC1S2/SLC25A6/CIDEB/ACAA2/BID/BNIP3/RHOT1/MLLT11/GCLC/PRELID1/GCLM/BCL2L1/TMEM14A/LMNA/HGF/ATG3/HK2/TP53/BNIP3L	48
BP	GO:0009451	RNA modification	71/5019	176/18903	4.46876968385467e-05	0.000632152950410769	0.000461446781048244	DTWD1/TARBP1/TRMT61B/TFB2M/TYW3/METTL5/PCIF1/THADA/DIMT1/NHP2/DKC1/METTL8/NAT10/PUS7/JMJD6/PARN/THUMPD2/METTL2A/TRMT11/SSB/SNRPD1/TRUB2/PUS7L/HNRNPAB/ELP4/SNRPD2/METTL2B/METTL15/APOBEC3A/ELP2/THG1L/METTL1/ALKBH3/TRMT13/ADAT2/FBL/RBM47/ELP3/OSGEPL1/RBM15B/SNRPE/SNRPF/NSUN2/ZCCHC4/DUS3L/PUS10/METTL14/NAF1/TRIT1/OSGEP/NSUN4/METTL3/APOBEC3B/DTWD2/TFB1M/ANKRD16/ELP5/TRMT10C/CDKAL1/TYW5/APOBEC3G/TRUB1/…	71
BP	GO:2000377	regulation of reactive oxygen species metabolic process	62/5019	149/18903	4.4982629517439e-05	0.000634920382195375	0.000463466897363366	CD177/FPR2/CYP1B1/ZC3H12A/TNF/ABCD2/ALOX5/ITGB2/TGFBR2/G6PD/RAC2/GRB2/GSTP1/ABCB7/HP/FOXO1/VDAC1/PRKCD/SOD2/ITGAM/PINK1/MMP8/GNAI2/CLEC7A/PTK2B/TSPO/PIKFYVE/CFLAR/GCH1/FYN/PRCP/MAPK14/TYROBP/FOXO3/DCXR/STK17A/RIPK3/BST1/BCR/HVCN1/AKR1C3/PLCG2/BNIP3/HIF1A/BRCA1/TLR6/TLR4/F2RL1/PDK3/GNAI3/GADD45A/TGFB1/CDKN1A/SYK/THBS1/SLC25A33/CYBA/CD36/CLCN3/SOD1/HK2/TP53	62
BP	GO:0090501	RNA phosphodiester bond hydrolysis	65/5019	158/18903	4.54360089793506e-05	0.000639907139678344	0.000467107034116487	N4BP1/APEX1/NOB1/TSR1/USB1/RPS21/POP5/EXOSC2/DROSHA/NOP14/ZC3H12A/NHP2/CPSF3/DIS3/RNASEH2A/RPP40/BMS1/NCBP2/SND1/PNPT1/PARN/EXOSC8/NCBP1/NUDT21/ISG20/CNOT7/RPP30/ERI2/ZC3H12D/ERN1/DIS3L/ISG20L2/TSEN2/EXOSC5/UTP20/PAN3/POLR2I/ANG/CSTF3/POLR3K/KRI1/CNOT2/EXOSC10/RNASEK/RMRP/NOL9/CPSF6/CSTF2T/ELAC2/NYNRIN/RCL1/NUDT12/EXOSC9/RNASEL/AGO3/RRS1/FEN1/RNASET2/ZC3H12C/SLFN14/CPSF2/RNASE6/AGO4/REXO2/SAMHD1	65
BP	GO:0045622	regulation of T-helper cell differentiation	24/5019	43/18903	4.57712218997417e-05	0.00064321141280648	0.000469519023489773	MYB/IL4R/IL23A/GATA3/NFKBID/RARA/JUNB/ZC3H12A/IRF4/TBX21/SMAD7/BCL6/IL18/SOCS5/BATF/ZBTB7B/NFKBIZ/NLRP3/JAK3/RC3H1/MALT1/IL12RB1/CD86/HLX	24
BP	GO:0006469	negative regulation of protein kinase activity	84/5019	216/18903	4.65699970466589e-05	0.000653001230518282	0.000476665205228267	ADORA2A/IPO7/NPM1/DUSP16/IPO5/INPP5K/IFNG/IBTK/PPIA/SMPD1/SH3BP5/SH3BP5L/HEG1/GADD45B/SMYD3/MVP/CEACAM1/ZNF675/GSTP1/NF2/RGS14/YWHAG/ABL1/LILRB4/CEP85/DEPTOR/PRKCD/TFAP4/DUSP1/RGS2/LRP5/SOCS5/SLC8A1/AKT1/SMCR8/CHMP6/PTPN1/LYN/PAQR3/PTPRJ/IL1B/CDKN1B/CAMK2N1/SOCS4/SPRY2/HEXIM1/PRKAR1A/LATS2/STK38/PTPRC/HSPB1/TNFAIP3/KAT2B/CDK5RAP3/HHEX/CASP3/CD300A/TRIB1/SPRY3/CHP1/PSEN1/MIR20A/SH2B3/TRIB2/GNAQ/GA…	84
BP	GO:0002313	mature B cell differentiation involved in immune response	19/5019	31/18903	4.95306591739824e-05	0.00069038172214487	0.000503951493339209	IL6/POU2AF1/XBP1/BCL3/PHF14/SPI1/CR1/LFNG/BCL6/PTK2B/FCGR2B/ADA/IL10/PLCG2/NOTCH2/ITM2A/NKX2-3/GPR183/IRF8	19
BP	GO:0009218	pyrimidine ribonucleotide metabolic process	19/5019	31/18903	4.95306591739824e-05	0.00069038172214487	0.000503951493339209	UPP1/UCK2/NME2/CTPS2/CDA/UMPS/NME7/NME1/AK3/CTPS1/DHODH/UPB1/CMPK1/NT5C/ENTPD4/CAD/DCK/NME4/DPYD	19
BP	GO:0032070	regulation of deoxyribonuclease activity	9/5019	10/18903	4.9667749794595e-05	0.00069038172214487	0.000503951493339209	NPM1/RPS3/DFFA/PRKCD/GZMA/AKT1/HMGB1/DDX11/PCNA	9
BP	GO:0060368	regulation of Fc receptor mediated stimulatory signaling pathway	9/5019	10/18903	4.9667749794595e-05	0.00069038172214487	0.000503951493339209	APPL1/CD226/RABGEF1/LYN/CSK/PTPRJ/PLSCR1/PTPRC/CD47	9
BP	GO:0032872	regulation of stress-activated MAPK cascade	77/5019	195/18903	5.19426243629111e-05	0.000720436312747188	0.000525890161948049	TRAF1/CCR7/GADD45G/DUSP16/MYD88/IL1A/MINK1/CD27/RASGRP1/SLAMF1/PPIA/ZC3H12A/TNF/PRMT1/MAPK3/FKTN/MBIP/GADD45B/ZMYND11/MAP3K3/SIRPA/ZNF675/SPI1/GSTP1/NOD2/EPHB1/PHLPP1/FOXO1/DUSP1/PLCB1/MAP3K11/KLHDC10/PINK1/MMP8/PTK2B/SASH1/FCGR2B/TRAF3/MIR181B1/HMGB1/NCF1/MAPK1/IL1B/SCIMP/MAP2K1/SDCBP/IGBP1/DLG1/NOD1/NBR1/MYC/NAIP/RASSF2/EZR/ULK4/VEGFA/SH3RF1/CYLD/PRDX1/TAOK3/TLR4/FAS/EDA2R/F2RL1/MIR20A/GADD45A/…	77
BP	GO:1990830	cellular response to leukemia inhibitory factor	45/5019	100/18903	5.2307568211908e-05	0.000723927686465238	0.000528438727390294	SPOCK2/PADI2/NCL/PRDM5/UBXN2A/MRPL15/SMAD7/ICAM1/SOCS3/KLF5/SBNO2/MSC/RIF1/MTF2/MAT2A/NUP35/KDM5B/BSPRY/PFKP/EEF1E1/WDR35/NFYB/RPS16/SRM/SNX10/SPRY2/SMARCA5/XRCC5/RNF125/CACYBP/TRIM25/SYNGR1/ARID5B/HELLS/KLF4/PCOLCE2/GCLM/TLE4/PIGA/TFRC/SRSF3/CACNB4/BCLAF1/HK2/MYBL2	45
BP	GO:0031334	positive regulation of protein-containing complex assembly	76/5019	192/18903	5.26174343629722e-05	0.000726643359215647	0.000530421061646968	CCR7/TRABD2A/TCL1A/NRG1/MYD88/DRG1/IFNG/CAND1/NR1H2/MECP2/ARL2/RPS3/FAF1/TNF/CKAP5/SKAP1/CDC42EP3/BCL2L11/GRB2/HSPA1A/PIEZO1/HSPA1B/CRBN/MLST8/VCP/ASAP1/HCK/CLU/FCHSD1/EVL/PINK1/CLEC7A/PTK2B/ARF6/FER/ATR/FSCN1/CTTN/PPP2R5B/VASP/CDKN1B/NCK2/MSN/PFN1/DLG1/LCP1/NCKAP1/DHX33/LGALS3/TERF1/GBP5/PLCG2/FMN1/BID/SNX9/ABCA1/VEGFA/CLIP1/PSMC6/TLR6/P2RY12/AKAP9/TLR4/PLEK/ATM/PAK1/SLAIN1/TGFB1/SYK/TFRC/CD36/O…	76
BP	GO:0009129	pyrimidine nucleoside monophosphate metabolic process	15/5019	22/18903	5.27784208052095e-05	0.000727295738423512	0.000530897272800134	UPP1/UCK2/CDA/UMPS/DCTD/DHODH/UPB1/DUT/CMPK1/TYMP/NT5C/TYMS/CAD/DCK/DPYD	15
BP	GO:0050921	positive regulation of chemotaxis	60/5019	144/18903	5.64891219783666e-05	0.000775634630716775	0.000566182762227447	CCR7/TNFSF14/C1QBP/IL23A/FPR2/XCL2/GPSM3/XCL1/IL6/CALR/SLAMF1/CXCR2/MAPK3/CMKLR1/S1PR1/PRKD2/TMSB4X/RAC2/IL16/EDN1/SPI1/CCR1/CREB3/C5AR1/NEDD9/DNM1L/DAPK2/STX3/PLA2G7/PTK2B/CCL4/CCR4/SUCNR1/CX3CR1/HMGB1/OXSR1/MAPK1/CCR6/CCL5/MCU/CCR2/HSPB1/CXCR4/VEGFA/LGMN/P2RY12/CCL3/MOSPD2/WNK1/F2RL1/LPAR1/SMAD3/CSF1R/TGFB1/THBS1/BMPR2/LGALS9/CSF1/AZU1/CCL1	60
BP	GO:0000460	maturation of 5.8S rRNA	21/5019	36/18903	5.65288923856768e-05	0.000775634630716775	0.000566182762227447	WDR12/PRKDC/RPS21/EXOSC2/NOP14/RPP40/MAK16/EXOSC8/ERI2/NSA2/UTP20/URB1/RRP15/KRI1/LAS1L/RPF1/EXOSC10/NOL9/RCL1/EXOSC9/RRS1	21
BP	GO:0046006	regulation of activated T cell proliferation	25/5019	46/18903	5.81456198455638e-05	0.000796109407478662	0.000581128543661061	IL23A/CD274/SLAMF1/CRTAM/RPS3/BTN2A2/LILRB4/STAT5B/IL18/GPAM/PDCD1LG2/ARG1/HMGB1/RIPK3/PRKAR1A/JAK3/CASP3/RC3H1/CD24/IL12RB1/IGFBP2/IL27RA/LGALS9/PRNP/TMIGD2	25
BP	GO:0150077	regulation of neuroinflammatory response	23/5019	41/18903	5.90538009569238e-05	0.000806816246407202	0.000588944114806568	IL6/TNF/MMP9/NR1D1/TNFRSF1B/LDLR/LRRK2/IL18/MIR128-1/MMP8/GRN/MIR181B1/IL1B/MIR142/PTPRC/PLCG2/CCL3/PTGS2/ATM/CD200/CST7/CD200R1/STAP1	23
BP	GO:0002716	negative regulation of natural killer cell mediated immunity	14/5019	20/18903	6.06325073082421e-05	0.00082486011006149	0.000602115425318579	KIR2DL4/LILRB1/KLRD1/KLRC1/SERPINB9/CEACAM1/ARRB2/HLA-E/HLA-F/HLA-A/HLA-B/HAVCR2/CLEC12B/LGALS9	14
BP	GO:0098543	detection of other organism	14/5019	20/18903	6.06325073082421e-05	0.00082486011006149	0.000602115425318579	CLEC6A/NLRC4/TLR1/NOD2/PGLYRP1/CLEC7A/NOD1/NAIP/HLA-A/HLA-B/TLR6/CD1D/TLR4/TLR2	14
BP	GO:0001701	in utero embryonic development	139/5019	393/18903	6.23927870853266e-05	0.000847005266716727	0.00061828051835141	ADM/ELL/ZFP36L1/GATA3/INPP5K/EOMES/MATR3/MFN2/RNASEH2B/RCN1/RPL7L1/PKD2/ZNF335/HES1/JUNB/MSH2/KAT2A/TTLL1/PALB2/BMI1/PRMT1/LEF1/KEAP1/PSPH/SNAI1/CCNB1IP1/MIB1/TFEB/HEG1/ACTL6A/TGFBR2/C5/BCL2L11/STMN3/HECTD1/POLG2/EDN1/YBX1/HORMAD1/GRB2/CCM2/SOCS3/PHF6/TBL1XR1/OCRL/UPB1/PRDM1/NSDHL/NECAB1/NSUN2/MYH9/TTLL4/WDTC1/TIE1/NDEL1/AKT1/APBA2/EIF2S2/NCOA1/SKIL/PKD1/RPL13/PTPN18/RTCB/STK4/NASP/GABPA/CNOT2/TM…	139
BP	GO:0002200	somatic diversification of immune receptors	38/5019	81/18903	6.50098722287715e-05	0.000880663396251621	0.000642849628595836	TCF7/CD28/CD40/CD40LG/BCL11B/SLC15A4/PRKDC/MSH2/THOC1/MSH6/LEF1/TBX21/UNG/ERCC1/TP53BP1/BCL6/RIF1/MLH1/EXOSC6/BATF/PMS2P1/TCF3/HMGB1/PMS2/PMS2P5/CCR6/APLF/PTPRC/IL10/ATAD5/DCLRE1C/STAT6/ATM/TGFB1/TFRC/IL27RA/SAMHD1/TNFSF13	38
BP	GO:2000278	regulation of DNA biosynthetic process	52/5019	121/18903	6.5538959436681e-05	0.000885953713822702	0.000646711352269374	CCT2/CCT6A/CCT4/CCT8/HNRNPA1/CYP1B1/CCT7/CCT3/MAPKAPK5/DKC1/NAT10/TNF/POT1/RFC3/MAPK3/PARN/PRKD2/POLG2/CTC1/MEAF6/TINF2/HSP90AB1/HNRNPC/NVL/ARRB2/CCT5/HNRNPD/PTK2B/PTGES3/NAF1/DSCC1/ATR/CHEK1/GINS2/TERF2/EXOSC10/RFC4/GINS1/MAPK1/DNAJC2/RFC5/XRCC5/MYC/TERF1/TNKS/KLF4/PCNA/ATM/CDKN1A/HGF/BMPR2/TP53	52
BP	GO:0043312	neutrophil degranulation	10/5019	12/18903	6.58207054204984e-05	0.000887885211938116	0.000648121269896713	CD177/STXBP2/ITGB2/SPI1/ITGAM/ANXA3/BCR/PTAFR/SYK/PRAM1	10
BP	GO:0006360	transcription by RNA polymerase I	31/5019	62/18903	6.73133955806307e-05	0.000906109160721163	0.000661424035467072	DEDD/SIRT7/NCL/WDR43/NOL11/HEATR1/PWP1/SMARCA4/POLR1A/WDR75/UBTF/MYBBP1A/UTP15/POLR1E/POLR1C/EIF2AK3/SMARCB1/RRN3/DHX33/SMARCA5/TTF1/SF3B1/DEK/ACTR6/TAF1B/RRN3P1/BAZ2A/DDX11/BAZ1B/GTF2H1/RRN3P2	31
BP	GO:0002827	positive regulation of T-helper 1 type immune response	13/5019	18/18903	6.76180460282195e-05	0.000906393681979949	0.000661631724791185	IL23A/SLC11A1/XCL1/SLAMF1/TBX21/IL18/IL18R1/IL1B/IL1R1/CCR2/IL12RB1/ARID5A/IL27RA	13
BP	GO:0046112	nucleobase biosynthetic process	13/5019	18/18903	6.76180460282195e-05	0.000906393681979949	0.000661631724791185	PAICS/CTPS2/GMPS/PPAT/UMPS/GART/CTPS1/APRT/HPRT1/DHODH/CMPK1/ADA/CAD	13
BP	GO:0006302	double-strand break repair	110/5019	300/18903	6.81951102303195e-05	0.000912216600026492	0.00066588222585606	PPP4C/DDX1/SIRT7/SMARCAD1/KDM1A/SMARCC1/PRKDC/NUCKS1/PARP2/MSH2/PSMD14/SETMAR/FAN1/WAS/BLM/PALB2/POT1/MTA1/FANCM/POLA1/UBE2V2/ACTL6A/SMARCA4/MEAF6/ERCC1/WDR70/PPP5C/REV3L/WRN/PHF10/SMARCE1/RUVBL1/ERCC8/VCP/PARP1/TP53BP1/MCM3/MBTD1/IFFO1/RIF1/MORF4L2/LIG3/MCM4/ACTR5/PBRM1/NSMCE4A/RAD50/TOP3A/XRCC6/MLH1/NSMCE1/MCM6/PARPBP/SMARCA2/SMARCD3/SFPQ/BRD7/ARID1B/SMARCB1/ATR/HMGB1/CHEK1/GINS2/TDP1/SMC5/YEAT…	110
BP	GO:0051235	maintenance of location	123/5019	342/18903	7.08117659747869e-05	0.000945240984640475	0.000689988727243611	CCR7/NFKBIB/PPARD/LCK/NFKBIE/EHD1/FFAR2/LCN2/SYNE1/SLC30A4/XCL1/IL6/IBTK/CALR/CPT1A/PKD2/NR1H2/DGAT2/LETM1/ZC3H12A/ARL2/LMAN1/TBCCD1/FAF1/TNF/KEAP1/PRKACA/TMSB4X/HSP90B1/ITGB3/ABL1/RASA3/STAT5B/FASLG/TTC39B/DGAT1/ANK3/HILPDA/GP5/NTSR1/PINK1/SLC8A1/PNPLA2/AKT1/GP1BA/PTK2B/PKD1/ITPR3/TSPO/FCER2/GOPC/LYN/FTL/SCARB1/CCR5/FTH1/OSBPL11/TXN/GRIK5/CD19/PLCG1/ALKBH7/CALM3/CD4/IL1B/RNF213/CCDC88A/CAMK2D/IT…	123
BP	GO:0035966	response to topologically incorrect protein	66/5019	163/18903	7.12094907341548e-05	0.000948569757821221	0.000692418600691321	DNAJB2/HSPA6/BAG3/DNAJB1/HSPA1L/MFN2/HSPA7/XBP1/ERP27/PPP1R15A/STT3B/TM7SF3/HSPA2/RHBDD2/MBTPS2/ERMP1/RNF185/BCL2L11/ERN1/HSPA1A/HSPA4/CREB3/HSPA1B/TMTC4/EIF2S1/CREB3L4/VCP/HSP90AB1/CLU/HERPUD1/AKIRIN2/ERLEC1/ATXN3/EIF2AK3/DNAJC10/ABCA7/PTPN1/RNF5/TOR1B/TMED2/NCK2/AUP1/DNAJB12/DERL1/MBTPS1/CREBRF/PPP1R15B/TRAM1/NGLY1/HSPB1/TMBIM6/HSPA13/CDK5RAP3/OPTN/YOD1/HSPE1/DDIT3/MANF/CREBZF/TOR1A/HSPH1/PIK3R…	66
BP	GO:0033674	positive regulation of kinase activity	170/5019	496/18903	7.16256701448223e-05	0.000952130010199571	0.00069501744484548	FLT3/CCR7/FAM20A/TCL1A/NPM1/IL23A/NRG1/AXIN2/CD40/CD40LG/IFNG/MOB3A/SLC11A1/EPHA4/KIT/RASGRP1/PFKFB2/PKD2/PPIA/LILRA5/CCNK/LMTK2/PIBF1/FGR/RPS3/PDE5A/TNF/MAP2K3/UNC119/PIK3R5/RPLP1/TGFBR2/EDN1/ERN1/MAP2K6/MOB3C/ETAA1/ADAM8/NOD2/LCP2/EPHB1/ITGB3/CHI3L1/ABL1/LAT/NEDD9/CCND3/MLST8/PRKCD/S100A12/BCL10/DAZAP2/HSP90AB1/LRRK2/MIF/IL18/CLU/MAP3K11/MAP2K5/RAP1A/RAD50/ANG/TIE1/PINK1/XRCC6/AKT1/PTK2B/PKD1/S…	170
BP	GO:2000232	regulation of rRNA processing	12/5019	16/18903	7.22955258405215e-05	0.000958755704398961	0.000699853940915824	SIRT7/WDR43/HEATR1/SHQ1/DIMT1/YTHDF2/WDR75/UTP15/METTL18/RIOK1/RIOK2/KAT2B	12
BP	GO:0006167	AMP biosynthetic process	11/5019	14/18903	7.25739382122454e-05	0.000958755704398961	0.000699853940915824	PAICS/ATIC/PPAT/GART/PFAS/APRT/HPRT1/PRPS2/ADSL/ADA/ADK	11
BP	GO:0043922	negative regulation by host of viral transcription	11/5019	14/18903	7.25739382122454e-05	0.000958755704398961	0.000699853940915824	INPP5K/NUCKS1/TFAP4/REST/PSMC3/TARDBP/CCL4/ZNF639/CCL5/CCL3/JUN	11
BP	GO:0071356	cellular response to tumor necrosis factor	89/5019	234/18903	7.34008261477546e-05	0.000967680169873696	0.000706368449569493	TRAF1/TCL1A/ZFP36L1/EXT1/TNFRSF13C/GATA3/XCL2/INPP5K/CD40/XCL1/CYP1B1/UBE2K/HES1/ZC3H12A/KAT2A/RPS3/TNFRSF14/TNF/COMMD7/MAPK3/NR1D1/RORA/TMSB4X/TNFRSF1B/EDN1/ZNF675/GSTP1/HSPA1A/IL18BP/ILK/HSPA1B/CHI3L1/BIRC3/ZFP36/CCL20/PRPF8/CARD16/DHX9/AKT1/PTK2B/RELA/CCL4/TRAF3/MIR181B1/MAPK14/MAPK1/FOXO3/CCL5/GBP1/CCL4L1/CASP1/NFKBIA/AIM2/GBP2/NAIP/KLF2/SPPL2A/TNFAIP3/HYAL3/NFKB1/TANK/BRCA1/RFFL/TRAF3IP2/KRT…	89
BP	GO:1905521	regulation of macrophage migration	24/5019	44/18903	7.54308271054379e-05	0.000992396519572366	0.000724410412357617	CYP19A1/CNN2/SLAMF1/SLAMF8/MAPK3/CMKLR1/C5/C5AR1/MIF/MIR128-1/PTK2B/CX3CR1/MAPK1/CCL5/BCR/P2RY12/CCL3/CSF1R/THBS1/CD200/CSF1/CD200R1/STAP1/CD9	24
BP	GO:0032386	regulation of intracellular transport	121/5019	336/18903	7.56787456589186e-05	0.000993613757172742	0.000725298947912342	XPO1/BAG3/EHD1/IPO5/INPP5K/IFNG/HSPA1L/RAN/SIRT7/LDLRAP1/GSK3A/XPO4/MTMR2/ZC3H12A/PTPN11/LMAN1/NCBP2/UBE2G2/CTDSPL2/MAPK3/VAMP2/ZFAND1/PCM1/CEP290/PLK3/PRKACA/ITGB2/HUWE1/RAC2/CSNK2A2/OAZ2/GDI1/HCLS1/MDN1/PDCD5/KHDRBS1/PRKCD/MX2/HSP90AB1/LRRK2/GZMB/TM9SF4/DHX9/ANK3/PCNT/NSUN2/ERLEC1/PREB/NDEL1/ITGAM/NUP54/PINK1/TARDBP/TCF7L2/PTPN1/OAZ1/FYN/NOLC1/CHMP3/TXN/RAB21/KCNE1/MAPK8/THOC2/MAPK14/MAPK1/IL1B…	121
BP	GO:0002710	negative regulation of T cell mediated immunity	17/5019	27/18903	7.6520804783616e-05	0.000998518419972327	0.000728879158776698	XCL1/IL7R/HFE/SLAMF1/LILRB1/KLRD1/TBX21/SMAD7/KLRC1/CEACAM1/NOD2/LILRB4/FCGR2B/ARG1/HLA-F/PTPRC/DUSP22	17
BP	GO:0042832	defense response to protozoan	17/5019	27/18903	7.6520804783616e-05	0.000998518419972327	0.000728879158776698	IL4R/MYD88/CD40/SLC11A1/BCL3/IRF4/PF4/CLEC7A/MIRLET7I/BATF/ARG1/GBP2/NKG7/IL10/DEFA1B/IRF8/BPGM	17
BP	GO:0046037	GMP metabolic process	17/5019	27/18903	7.6520804783616e-05	0.000998518419972327	0.000728879158776698	PAICS/IMPDH2/GMPS/ATIC/PPAT/CARD11/GART/PFAS/APRT/HPRT1/ADSL/IMPDH1/ADA/DLG1/ADK/MPP1/CASK	17
BP	GO:0050730	regulation of peptidyl-tyrosine phosphorylation	99/5019	266/18903	8.00812507245659e-05	0.00104285034039282	0.000761239716395595	FLT3/IL23A/NRG1/CD40/IFNG/EPHA4/SH2D1B/NCL/CD3E/KIT/IL6/IBTK/HES1/LILRA5/HDAC2/PTPN11/CLEC6A/PIBF1/TNFRSF14/SH3BP5/PDCL3/TNF/UNC119/SH3BP5L/EHD4/ITGB2/CNOT7/MVP/IL15/SEMA4D/SOCS3/NF2/NOD2/HCLS1/ITGB3/ABL1/LILRB4/NEDD9/MLST8/PRKCD/MIF/IL18/ARRB2/SOCS5/PTK2B/CHMP6/PECAM1/PTPN1/LYN/FYN/NCF1/PTPRJ/CD4/ANGPT1/CCL5/PPP2R5B/NCK2/OSM/IL6ST/PARP9/BST1/FBXW7/TGFA/SOCS4/HAX1/PTPRC/PLCG2/CD300A/VEGFA/ZNF592/…	99
BP	GO:0007059	chromosome segregation	135/5019	382/18903	8.23424105116772e-05	0.00107011661140582	0.000781143021413728	SEH1L/PDS5A/AXIN2/RAN/SIRT7/SMARCAD1/CHMP7/SMARCC1/ANAPC5/RCC1/PIBF1/RPS3/TOP2B/CDC23/NDC1/CHMP2A/FANCM/CCNB1IP1/RAD18/ANAPC7/ACTL6A/ANAPC1/NUP43/SLC25A5/SMARCA4/CSNK2A2/EML4/HORMAD1/CHMP1A/CDC16/SETDB2/RGS14/RCC2/HDAC8/CHMP4B/CEP85/PHF10/ZWILCH/SMARCE1/ZW10/SPICE1/DUSP1/MAU2/MSH5/PBRM1/TOP3A/NDEL1/ARL8A/KNTC1/CSNK2A1/PUM2/MLH1/CHMP6/SMARCA2/SMARCD3/SMC2/SFPQ/CHMP3/DSCC1/BRD7/ARID1B/PHB2/STAG3L2/…	135
BP	GO:0060759	regulation of response to cytokine stimulus	71/5019	179/18903	8.44055183318642e-05	0.00109470361909521	0.000799090569624183	ZBP1/PADI2/IL1RN/IL6/UBE2K/NR1H2/TAF9/MAPK7/OTUD4/PTPN11/IRAK2/NLRC5/YTHDF2/CNOT7/RNF185/EDN1/ZNF675/LRRC70/GSTP1/HSPA1A/HSPA1B/CARD16/RABGEF1/DHX9/MAP2K5/PTPN1/METTL3/ARG1/CD300LF/ANGPT1/CCL5/OAS1/PARP9/IL1R1/MAVS/CASP1/NAIP/PTPRC/SPPL2A/TNFAIP3/CXCR4/C1QTNF4/HIF1A/RFFL/TTLL12/CYLD/LAPTM5/GFI1/KLF4/TLR4/TNFRSF1A/CD24/IRGM/F2RL1/TRIM6/OAS3/IFIH1/TRIM44/SH2B3/STAT2/SYK/IL1R2/TXK/TLR2/SAMHD1/CSF1/P…	71
BP	GO:0006220	pyrimidine nucleotide metabolic process	27/5019	52/18903	8.54647522744012e-05	0.00110619762356786	0.000807480740644992	UPP1/UCK2/NME2/CTPS2/NEIL1/CDA/DCTPP1/UMPS/NME7/NME1/UNG/DCTD/AK3/CTPS1/TDG/DHODH/UPB1/DUT/CMPK1/TYMP/NT5C/ENTPD4/TYMS/CAD/DCK/NME4/DPYD	27
BP	GO:2000116	regulation of cysteine-type endopeptidase activity	89/5019	235/18903	8.77112587576374e-05	0.00113298139090168	0.000827031836961966	TNFSF14/ADORA2A/LCK/POR/CD27/RPS3/TNF/MMP9/PDCD2/MEFV/NLRC4/NLRP12/NLRP1/SERPINB9/FAM162A/BCL2L11/TRIAP1/CAAP1/PDCD5/BIRC3/AIFM1/FASLG/VCP/CARD16/BCL10/TFAP4/NR4A1/MAP2K5/REST/ARRB2/AKT1/CSNK2A1/CLEC7A/EIF2AK3/CTSH/RAF1/CFLAR/FYN/PLAUR/LTF/CASP2/CYFIP2/HMGB1/GRAMD4/RPS6KA1/TNFSF10/ANP32B/IGBP1/S100A8/MICAL1/CASP1/CAST/CTSD/NOD1/AIM2/MYC/PCID2/NAIP/NLRP3/CIDEB/ASPH/S100A9/NLE1/ARL6IP1/ST20/BID/PRD…	89
BP	GO:0034101	erythrocyte homeostasis	57/5019	137/18903	8.96824114965492e-05	0.00115610753852608	0.000843913014804116	MYB/ZFP36L1/CDK6/GATA3/RPS17/RPS19/RPS24/KIT/RPS6/PRKDC/TGFBR3/PRMT1/ETS1/JMJD6/UBA5/HMOX1/ID2/SLC25A5/G6PD/SPI1/HSPA1A/HCLS1/HSPA1B/SMAD5/ZFP36/STAT5B/ACVR2A/TMEM14C/BCL6/LYN/MAFB/MAPK14/FOXO3/IREB2/IKZF1/KLF2/GATA2/JAK3/CDK5RAP3/ALAS1/RPS14/STAT3/CASP3/HIF1A/VEGFA/PRDX1/KCNQ1/SH2B3/ACVR1B/UFL1/HOXA5/SLC25A40/L3MBTL3/BPGM/SLC25A38/EPB42/INHBA	57
BP	GO:0140694	non-membrane-bounded organelle assembly	136/5019	386/18903	9.09924615690933e-05	0.00117063541101164	0.000854517790103484	C1QBP/NPM1/RPLP0/DRG1/G3BP1/RPS19/BRIX1/RPS23/TUBB1/RPL11/CHMP7/RPL24/WDR1/FASTKD2/RPL6/PRKDC/TUBGCP5/PATL1/KAT2A/RCC1/RPSA/PIBF1/RPS3/PGM5/TNF/RPS5/LSM3/MRTO4/EIF2A/MRPL22/CHMP2A/PATL2/CENPJ/RPF2/YTHDF2/CNOT7/RPL38/EDN1/MRPS11/DBNL/CHMP1A/BCCIP/HSPA1A/CEP76/ERAL1/MDN1/HSPA1B/CHMP4B/MRPS7/TUBGCP4/ALMS1/EIF2S1/TUBB/DAZAP2/ASAP1/CSNK1D/SPICE1/TIA1/HCK/DHX37/PAN3/HAUS6/LSM4/FLII/KNTC1/PUM2/MLH1/CHMP…	136
BP	GO:0002758	innate immune response-activating signal transduction	19/5019	32/18903	9.16013800457054e-05	0.00117610285946233	0.000858508812349731	FFAR2/KIR2DS2/KLRD1/CLEC6A/LILRA2/KLRC4/FCN1/KLRC2/HCK/KLRC3/CLEC7A/LYN/FYN/FCN2/TYROBP/CREBBP/PLCG2/PAK1/SYK	19
BP	GO:0071902	positive regulation of protein serine/threonine kinase activity	87/5019	229/18903	9.2020457824678e-05	0.00117870261822603	0.00086040653395687	FLT3/FAM20A/TCL1A/CD40/CD40LG/IFNG/EPHA4/KIT/RASGRP1/PKD2/CCNK/RPS3/PDE5A/TNF/PIK3R5/EDN1/ERN1/MAP2K6/ETAA1/ADAM8/NOD2/CCND3/MLST8/S100A12/DAZAP2/HSP90AB1/LRRK2/MIF/MAP3K11/MAP2K5/AKT1/PTK2B/PKD1/SASH1/SPDYE3/STK4/PTPN1/LTF/CSK/ADAM9/ALS2/RALB/CALM3/FGD2/DVL3/IL1B/STRADA/CDKN1B/MAP2K1/TGFA/ACSL1/SPRY2/CALM1/MNAT1/CAB39/PTPRC/PIK3R6/CKS1B/VEGFA/IQGAP1/AKAP13/TLR6/CCND2/TAOK3/TLR4/CD24/IRGM/INSR/PS…	87
BP	GO:0002701	negative regulation of production of molecular mediator of immune response	25/5019	47/18903	9.30218506518882e-05	0.00117870261822603	0.00086040653395687	CD22/FCRL3/XCL1/HFE/SLAMF1/LILRB1/THOC1/TNF/HMOX1/TBX21/SMAD7/NOD2/LILRB4/CR1/RABGEF1/BCL6/FCGR2B/ARG1/ANGPT1/HLA-F/JAK3/TMBIM6/IL10/TGFB1/EPX	25
BP	GO:0006984	ER-nucleus signaling pathway	25/5019	47/18903	9.30218506518882e-05	0.00117870261822603	0.00086040653395687	XBP1/PPP1R15A/ERLIN1/EIF2A/MBTPS2/BCL2L11/EIF2S1/EIF2AK3/ABCA7/PTPN1/TMED2/ZBTB7B/NCK2/FBXW7/MBTPS1/PPP1R15B/TMCO1/ERLIN2/CCDC47/DDIT3/CREBZF/INSIG1/LPCAT3/TP53/HSPA5	25
BP	GO:0090199	regulation of release of cytochrome c from mitochondria	25/5019	47/18903	9.30218506518882e-05	0.00117870261822603	0.00086040653395687	MMP9/FAM162A/BCL2L11/TRIAP1/PDCD5/DNM1L/FXN/CLU/PPIF/ARRB2/PINK1/AKT1/PLAUR/OPA1/PLSCR3/TNFSF10/CIDEB/BID/BNIP3/MLLT11/PRELID1/BCL2L1/LMNA/HGF/TP53	25
BP	GO:1902895	positive regulation of miRNA transcription	25/5019	47/18903	9.30218506518882e-05	0.00117870261822603	0.00086040653395687	MYB/GATA3/GNL3/NR1H2/TNF/ETS1/SMARCA4/SPI1/KLF5/RELA/WT1/FOXO3/MYC/GATA2/IL10/STAT3/HIF1A/KLF4/FOS/JUN/SMAD1/SMAD3/TGFB1/TP53/EGR1	25
BP	GO:0002562	somatic diversification of immune receptors via germline recombination within a single locus	34/5019	71/18903	9.30942793562941e-05	0.00117870261822603	0.00086040653395687	TCF7/CD28/CD40/CD40LG/BCL11B/SLC15A4/PRKDC/MSH2/THOC1/MSH6/LEF1/TBX21/UNG/ERCC1/TP53BP1/BCL6/RIF1/MLH1/EXOSC6/BATF/TCF3/HMGB1/CCR6/APLF/PTPRC/IL10/ATAD5/DCLRE1C/STAT6/ATM/TGFB1/TFRC/IL27RA/TNFSF13	34
BP	GO:0016444	somatic cell DNA recombination	34/5019	71/18903	9.30942793562941e-05	0.00117870261822603	0.00086040653395687	TCF7/CD28/CD40/CD40LG/BCL11B/SLC15A4/PRKDC/MSH2/THOC1/MSH6/LEF1/TBX21/UNG/ERCC1/TP53BP1/BCL6/RIF1/MLH1/EXOSC6/BATF/TCF3/HMGB1/CCR6/APLF/PTPRC/IL10/ATAD5/DCLRE1C/STAT6/ATM/TGFB1/TFRC/IL27RA/TNFSF13	34
BP	GO:0046033	AMP metabolic process	16/5019	25/18903	9.40514955326701e-05	0.00118378988668483	0.000864120039767632	PAICS/ATIC/PPAT/GART/AK3/PFAS/APRT/HPRT1/PRPS2/ADSL/AMPD3/AMPD2/AK2/ADA/AK4/ADK	16
BP	GO:0070423	nucleotide-binding oligomerization domain containing signaling pathway	16/5019	25/18903	9.40514955326701e-05	0.00118378988668483	0.000864120039767632	SLC15A4/SLC15A3/SLC46A2/MAP2K6/HSPA1A/NOD2/HSPA1B/BIRC3/RELA/NFKBIA/TNFAIP3/SLC15A2/CYLD/TLR4/IRGM/PTPN22	16
BP	GO:0098581	detection of external biotic stimulus	16/5019	25/18903	9.40514955326701e-05	0.00118378988668483	0.000864120039767632	CLEC6A/NLRC4/LY96/TLR1/NOD2/PGLYRP1/CLEC7A/SCARB1/NOD1/NAIP/HLA-A/HLA-B/TLR6/CD1D/TLR4/TLR2	16
BP	GO:0010506	regulation of autophagy	123/5019	344/18903	9.45190168894075e-05	0.0011873371198249	0.0008667093803901	ATP6V0C/BAG3/IFNG/WDR45/WDR41/SESN2/GPR137B/GSK3A/PIP4K2C/ATP6V0D1/ZC3H12A/SNX18/WIPI1/IL10RA/MAPK3/HMOX1/MEFV/KEAP1/SOGA1/PLK3/TFEB/PRKACA/SLC25A5/ATP6V0A2/MTMR3/TOM1/BCL2L11/TBC1D25/CSNK2A2/ERN1/NPC1/RRAGC/NOD2/QSOX1/GPSM1/CHMP4B/ABL1/PIP4K2B/FOXO1/VDAC1/MLST8/DNM1L/LRRK2/DAPK2/CAPNS1/ATP6V0B/USP10/PINK1/AKT1/SMCR8/TSPO/ATG16L1/PIM2/ATG2A/RNF5/ZKSCAN3/MAPK8/HMGB1/RALB/TRIM21/ATP6V0A1/FOXO3/CTTN…	123
BP	GO:0008625	extrinsic apoptotic signaling pathway via death domain receptors	39/5019	85/18903	9.61598806152337e-05	0.0012055809346153	0.000880026647364183	DEDD2/MAL/DEDD/BAG3/ITPRIP/FAF1/TNF/TMBIM1/HMOX1/ICAM1/SPI1/FASLG/FAIM/GABARAP/SKIL/RAF1/CFLAR/STK4/DDX47/BLOC1S2/ZDHHC3/SORT1/LGALS3/SP100/PEA15/TNFAIP3/TNFRSF10A/TNFRSF10B/BID/TMC8/BRCA1/RFFL/TNFRSF1A/PIK3R1/BCL2L1/PTEN/THBS1/NF1/HGF	39
BP	GO:0032735	positive regulation of interleukin-12 production	23/5019	42/18903	9.78482466990624e-05	0.00122195642459728	0.000891980110739397	LTB/CCR7/IL23A/CD40/CD40LG/IFNG/IRF1/IL16/NOD2/PLCB1/CLEC7A/RELA/HMGB1/MAPK14/SCIMP/PLCG2/LAPTM5/TLR4/SYK/CD36/TLR2/LGALS9/IRF8	23
BP	GO:0032814	regulation of natural killer cell activation	23/5019	42/18903	9.78482466990624e-05	0.00122195642459728	0.000891980110739397	IL23A/RASGRP1/KLRD1/PIBF1/FGR/KLRC1/FCGR3A/IL15/BLOC1S3/STAT5B/KLRC2/PRDM1/IL18/PGLYRP1/KLRC3/TYK2/TYROBP/AP1G1/HLA-E/HLA-F/HAVCR2/TOX/PTPN22	23
BP	GO:1901222	regulation of NIK/NF-kappaB signaling	48/5019	111/18903	0.000102130585071892	0.00127294924161731	0.000929202860795671	TNFSF14/IL23A/NR3C2/CD27/CALR/RBCK1/LITAF/ZC3H12A/RPS3/TNF/BCL3/NLRP12/TMSB4X/EDN1/SPI1/NOD2/ILK/C1QTNF3/ADIPOR1/CD14/IL18/MMP8/RELA/SASH1/IL18R1/PHB2/IL1B/IFI35/NOD1/NFKBIA/NLRP3/RASSF2/C1QTNF4/AGO3/CYLD/RC3H1/LAPTM5/PRDX1/TLR7/TLR4/TRIM44/HAVCR2/CD86/APP/TLR2/LGALS9/PDCD4/PTPN22	48
BP	GO:0050821	protein stabilization	82/5019	214/18903	0.000103058138395679	0.00128201116128788	0.000935817705604016	NPM1/BAG3/CCT2/UXT/FLOT2/TRIM39/EPHA4/CCT6A/CCT4/CCT8/RPL11/CCT7/CALR/CCT3/SUGT1/NAA15/TAF9/URI1/PDCL3/TMEM88/PFDN2/IFT46/GTPBP4/RPS7/SMAD7/PRKRA/HSP90AB3P/FLOT1/HSPA1A/HSPA1B/STXBP4/RUVBL1/PRKCD/HSP90AB1/SOX4/CLU/HYPK/CCT5/PINK1/PFDN4/GRN/ATP1B1/PTGES3/TTI1/PIM2/STK4/PHB2/RAB21/DVL3/TYROBP/USP13/UBE2B/FBXW7/PFN1/DNAAF2/ZBED3/TAF9B/CREBL2/RASSF2/IFI30/CHP1/PPIB/IRGM/HPS4/CTNND1/TBL1X/SMAD3/RUVBL2…	82
BP	GO:0071375	cellular response to peptide hormone stimulus	111/5019	306/18903	0.000104936211924053	0.0013007549411495	0.000949499927408407	ZFP36L1/PXN/INPP5K/CDK4/SLC9A1/NCL/POR/APEX1/GSK3A/CYP1B1/APPL1/SMARCC1/PRKDC/PIP4K2C/XBP1/NUCKS1/FOXO4/SH2B2/PTPN11/EEF2K/VAMP2/SOGA1/PRKCI/CEACAM1/ZDHHC7/EDN1/APRT/GRB2/SOCS3/YWHAG/ITGB3/ADIPOR1/PIP4K2B/FOXO1/STXBP4/CCND3/STAT5B/PRKCD/PARP1/PLCB1/AGTRAP/USO1/NR4A1/WDTC1/PTPRE/NDEL1/AKT1/GNAI2/RAP1GDS1/NCOA1/RELA/USF1/CFLAR/PTPN1/LYN/TYK2/CSK/FER/ARG1/ZBTB7B/IL1B/GOT1/NCOA5/SNX5/RAB31/RHOQ/SRD5A…	111
BP	GO:0051099	positive regulation of binding	70/5019	177/18903	0.000104971778172215	0.0013007549411495	0.000949499927408407	BLK/EIF3E/GATA3/IFNG/RAN/EPHA4/KDM1A/EIF3D/RPL11/HFE/AKTIP/RARA/HES1/ZNF618/EDF1/MMP9/NME1/IRF4/NCBP1/EIF3C/TIAM1/FLOT1/NMD3/GPSM1/ABL1/EIF2S1/PARP1/DAZAP2/LFNG/HSP90AB1/LRRK2/DHX9/STMN1/NVL/MMP8/PKD1/PLCL2/MBD2/TCF7L2/STK4/PLAUR/PLXND1/TXN/HMGB1/ADD1/PLCL1/RALB/LRP1/CALM3/TRIM21/SUMO4/PARP9/FKBP1A/KRIT1/CALM1/DERL1/TRIM28/NPHP3/KLF4/DDX11/GMNN/TRIM6/PSEN1/IDE/TGFB1/PYHIN1/APP/CAV1/EPB41/FOXC1	70
BP	GO:1905037	autophagosome organization	50/5019	117/18903	0.000106402935832448	0.00131593882342876	0.000960583564045754	BAG3/MFN2/WDR45/PIP4K2C/SNX18/WIPI1/UBXN2A/ATG9A/RAB19/MTMR3/TOM1/ULK3/CHMP4B/PIP4K2B/LRRK2/GABARAP/MAP1LC3B/PINK1/GABARAPL1/SMCR8/PIKFYVE/ATG16L1/MAP1LC3B2/ATG2A/RNF5/TCIRG1/RALB/ULK1/SNX4/C9orf72/CTSD/GABARAPL2/IFT88/LRBA/RAB1B/UBXN2B/PIP4K2A/ATG7/IRGM/RAB7A/PSEN1/ATG14/RAB1A/STX12/UBQLN2/ATG16L2/ATG3/TBC1D12/TP53INP2/ULK2	50
BP	GO:0034121	regulation of toll-like receptor signaling pathway	36/5019	77/18903	0.000109390913649825	0.00135028089165441	0.000985651922624111	LILRA4/FCRL3/SLC15A4/APPL1/OTUD4/GPR108/NR1D1/IRF4/NINJ1/IRF1/TLR5/TLR1/FLOT1/NOD2/LILRA2/CD14/BIRC3/ARRB2/LYN/LTF/HMGB1/GRAMD4/CD300LF/IFI35/TNFAIP3/CD300A/SMPDL3B/TLR6/GFI1/F2RL1/PELI1/CYBA/CD36/TLR2/PTPN22/CAV1	36
BP	GO:0010508	positive regulation of autophagy	59/5019	144/18903	0.000113879745155223	0.0014014943352271	0.00102303572138303	BAG3/IFNG/WDR45/SESN2/GSK3A/PIP4K2C/ZC3H12A/SNX18/WIPI1/MAPK3/HMOX1/MEFV/PLK3/TFEB/SLC25A5/TOM1/BCL2L11/NOD2/GPSM1/PIP4K2B/FOXO1/VDAC1/LRRK2/PINK1/SMCR8/ATG16L1/PIM2/ATG2A/HMGB1/RALB/TRIM21/FOXO3/ULK1/SNX4/PLK2/C9orf72/NOD1/TRIM38/LARP1/PIP4K2A/TRIM8/BNIP3/HIF1A/OPTN/SPTLC2/TPCN1/IRGM/TRIM6/CAMKK2/PRKAA1/MID2/GNAI3/UFL1/MTDH/SVIP/TP53INP2/BNIP3L/CALCOCO2/ULK2	59
BP	GO:0032388	positive regulation of intracellular transport	77/5019	199/18903	0.000114143888960499	0.0014014943352271	0.00102303572138303	BAG3/EHD1/IPO5/IFNG/HSPA1L/RAN/LDLRAP1/GSK3A/XPO4/MTMR2/ZC3H12A/NCBP2/CTDSPL2/VAMP2/ZFAND1/PCM1/CEP290/PLK3/PRKACA/ITGB2/HUWE1/RAC2/CSNK2A2/OAZ2/HCLS1/PDCD5/KHDRBS1/PRKCD/HSP90AB1/GZMB/TM9SF4/DHX9/ANK3/PCNT/ITGAM/PINK1/TARDBP/TCF7L2/OAZ1/FYN/RAB21/MAPK8/MAPK14/IL1B/EFCAB7/MSN/ANP32B/BCAS3/FBXW7/CPSF6/MAVS/TRIM28/RIOK2/UBE2D3/YWHAE/EZR/JUP/DYNC1H1/CHP1/RDX/STOM/MLC1/PTGS2/HPS4/PSEN1/PRKAA1/SMAD3/P…	77
BP	GO:0051656	establishment of organelle localization	151/5019	437/18903	0.000114238337673841	0.0014014943352271	0.00102303572138303	BLK/XPO1/IL4R/NPM1/TRAPPC1/ABCE1/LRPPRC/SEH1L/IFNG/UXT/RAN/DNM2/CHMP7/KIT/RASGRP1/STXBP2/VAMP8/DOCK7/PIBF1/FGR/RAB3A/LTV1/WIPI1/LIMK2/STARD3NL/AP3S2/KXD1/SYNE2/HMOX1/CDC23/PIK3CD/PCM1/CHMP2A/LMNB2/TRAPPC11/RAC2/EML4/PTGDR/CHMP1A/NMD3/AP3B2/GPSM1/F8A2/MDN1/CHMP4B/LAT/BLOC1S3/YKT6/COPG2/SYNJ1/MYO1F/ZW10/RABGEF1/CSNK1D/SPICE1/LRRK2/MYH9/PREB/NDEL1/PINK1/MLH1/SDAD1/CHMP6/ITGA4/AP3M1/LYN/EXOC5/CHMP3/B…	151
BP	GO:0048143	astrocyte activation	15/5019	23/18903	0.000114416647323826	0.0014014943352271	0.00102303572138303	ADORA2A/IFNG/IL6/TNF/NR1D1/C5AR1/LDLR/GRN/MIR181B1/LRP1/IL1B/MIR142/PSEN1/IFNGR1/APP	15
BP	GO:0070198	protein localization to chromosome, telomeric region	18/5019	30/18903	0.000116107423664858	0.00141677646357463	0.00103419107378462	CCT2/GNL3/CCT6A/CCT4/CCT8/CCT7/CCT3/DKC1/POT1/TINF2/CCT5/TPP1/ATR/TERF2/XRCC5/BRCA2/TERF1/TNKS	18
BP	GO:0072539	T-helper 17 cell differentiation	18/5019	30/18903	0.000116107423664858	0.00141677646357463	0.00103419107378462	IL23A/NFKBID/IL6/JUNB/ZC3H12A/LY9/IRF4/TBX21/RORA/SMAD7/SLAMF6/BATF/ZBTB7B/NFKBIZ/STAT3/RC3H1/MALT1/IL12RB1	18
BP	GO:0051222	positive regulation of protein transport	107/5019	294/18903	0.000119239351672294	0.00145222174208123	0.00106006473246105	BLK/ADORA2A/PPARD/BAG3/IPO5/IFNG/HSPA1L/RAN/IL1A/GSK3A/XPO4/ABAT/WLS/PFKFB2/PPIA/NR1H2/ZC3H12A/ATP2C1/APBB3/TM7SF3/TNF/CTDSPL2/IER3IP1/VAMP2/ZFAND1/PCM1/CEP290/PLK3/PRKACA/ITGB2/HUWE1/RAC2/CSNK2A2/OAZ2/ADAM8/HCLS1/C1QTNF3/PDCD5/PRKCD/DNM1L/HSP90AB1/GZMB/TM9SF4/SOX4/ANK3/PCNT/C2CD2L/HCAR2/ANG/ITGAM/PINK1/TARDBP/TCF7L2/OAZ1/FYN/ARF6/CD38/KCNN4/GOLPH3L/ADAM9/MAPK8/MAPK14/SEC24A/IL1B/EFCAB7/ANP32B/BC…	107
BP	GO:0061013	regulation of mRNA catabolic process	74/5019	190/18903	0.000120585673964306	0.00146115328416381	0.00106658440676001	NPM1/ZFP36L1/FASTKD1/PAIP1/GTPBP1/MYD88/AXIN2/SLC11A1/SYNCRIP/APEX1/POLR2D/SERBP1/FASTKD2/EXOSC2/ZC3H12A/PATL1/FXR1/DIS3/TTC5/PNPT1/PARN/EXOSC8/IGF2BP2/PATL2/ZC3H14/YTHDF2/TNRC6C/CNOT7/HNRNPAB/DHX34/ZC3H12D/YBX1/KHSRP/UPF1/EIF4A3/TOB1/ZFP36/EXOSC5/PRKCD/DHX9/BTG2/PAN3/ELAVL1/HNRNPC/HNRNPD/TARDBP/AKT1/RBM38/HNRNPA0/PUM2/CPEB3/METTL14/MLH1/CASC3/DCP1B/CNOT2/METTL3/NBAS/CSDE1/MAPK14/POLR2G/PCID2/ROC…	74
BP	GO:2000401	regulation of lymphocyte migration	33/5019	69/18903	0.000121114204733409	0.00146115328416381	0.00106658440676001	TNFSF14/XCL2/PADI2/XCL1/STK10/TNFRSF14/ADAM8/ITGB3/ABL1/NEDD9/CCL20/SPN/AKT1/PTK2B/SPNS2/CCL4/ITGA4/OXSR1/CCR6/CCL5/MSN/RIPK3/CCR2/LRCH1/GCSAML/CCL3/WNK1/CORO1A/APP/DOCK8/IL27RA/CD200/CD200R1	33
BP	GO:0033003	regulation of mast cell activation	24/5019	45/18903	0.000121115301940385	0.00146115328416381	0.00106658440676001	BLK/IL4R/STXBP2/VAMP8/FGR/HMOX1/RAC2/CD226/RABGEF1/LYN/FER/CD300LF/C12orf4/PLSCR1/SNX4/GATA2/CD300A/CRLF2/SYK/UNC13D/LGALS9/MILR1/PTPN6/NR4A3	24
BP	GO:0062208	positive regulation of pattern recognition receptor signaling pathway	24/5019	45/18903	0.000121115301940385	0.00146115328416381	0.00106658440676001	OASL/SLC15A4/SLC15A3/SLC46A2/NINJ1/TLR5/TLR1/FLOT1/HSPA1A/HSPA1B/CD14/ANKRD17/PUM2/LTF/HMGB1/IFI35/TLR4/F2RL1/USP15/PELI1/CYBA/TLR2/PTPN22/CAV1	24
BP	GO:1900744	regulation of p38MAPK cascade	24/5019	45/18903	0.000121115301940385	0.00146115328416381	0.00106658440676001	GADD45G/MINK1/ZC3H12A/PRMT1/GADD45B/MAP3K3/SPI1/PHLPP1/DUSP1/SASH1/MIR181B1/NCF1/IL1B/DLG1/EZR/ULK4/VEGFA/CYLD/MIR20A/GADD45A/HGF/DUSP10/PTPN22/MAP3K5	24
BP	GO:2001252	positive regulation of chromosome organization	46/5019	106/18903	0.000127390585198691	0.00153396497506672	0.00111973407626325	CCT2/GNL3/CCT6A/CCT4/CCT8/HNRNPA1/CCT7/CCT3/MAPKAPK5/DKC1/POT1/MAPK3/PARN/SSBP1/ACTL6A/TFPT/ERCC1/SETDB2/UCHL5/PPHLN1/RUVBL1/TINF2/RAD50/CCT5/HNRNPD/NAF1/SMC2/SFPQ/ATR/TERF2/SMC5/MAPK1/DNMT1/XRCC5/TRIM28/ACTR8/TERF1/SMC4/GTF2H2/TNKS/DDX11/FEN1/RUVBL2/ATM/ATF7IP2/NCAPG	46
BP	GO:1902893	regulation of miRNA transcription	30/5019	61/18903	0.000129136667212623	0.00155206738751412	0.00113294812509056	MYB/PPARD/GATA3/GNL3/RARA/NR1H2/TNF/ETS1/ZNF512B/SMARCA4/SPI1/KLF5/LILRB4/REST/RELA/WT1/FOXO3/MYC/GATA2/IL10/STAT3/HIF1A/KLF4/FOS/JUN/SMAD1/SMAD3/TGFB1/TP53/EGR1	30
BP	GO:0071622	regulation of granulocyte chemotaxis	27/5019	53/18903	0.000130382320652386	0.00156028853269365	0.00113894923760164	CCR7/C1QBP/IL23A/XCL1/C5AR2/SLAMF1/CXCR2/MAPK3/CMKLR1/RAC2/EDN1/DPP4/NOD2/C5AR1/DNM1L/DAPK2/TNFAIP6/MAPK1/CCL5/BST1/MCU/MOSPD2/CSF1R/THBS1/MPP1/JAM3/CSF1	27
BP	GO:0097300	programmed necrotic cell death	27/5019	53/18903	0.000130382320652386	0.00156028853269365	0.00113894923760164	ZBP1/RBCK1/TNF/TRPM7/CASP6/BIRC3/AIFM1/FASLG/DNM1L/PARP1/PPIF/PGAM5/MLKL/IPMK/CFLAR/ITPK1/ALKBH7/RIPK3/OGT/CYLD/FAS/PELI1/PYGL/ASAH1/TP53/CAV1/MAP3K5	27
BP	GO:0032868	response to insulin	99/5019	269/18903	0.000130552762744933	0.00156028853269365	0.00113894923760164	ADM/ZFP36L1/ALPL/INPP5K/CDK4/SLC9A1/NCL/SESN2/GSK3A/APPL1/SMARCC1/PRKDC/PIP4K2C/XBP1/NUCKS1/FOXO4/SH2B2/PTPN11/EEF2K/HADH/VAMP2/SOGA1/RETN/PRKCI/SRSF6/CEACAM1/ZDHHC7/APRT/GRB2/SOCS3/YWHAG/ADIPOR1/PIP4K2B/FOXO1/STXBP4/CCND3/PRKCD/PARP1/USO1/WDTC1/PTPRE/NDEL1/AKT1/GNAI2/NCOA1/USF1/CFLAR/PTPN1/LYN/FER/ZBTB7B/MAPK14/IL1B/EGR2/TNFSF10/GOT1/NCOA5/SORT1/SNX5/CAT/ZBED3/RAB31/RHOQ/SRD5A1/OGT/PDK4/VPS13C/D…	99
BP	GO:0019079	viral genome replication	54/5019	130/18903	0.000142491132604728	0.00169347268006437	0.00123616842490582	N4BP1/CD28/INPP5K/TNIP1/EIF2AK4/OASL/PPIA/CCNK/NUCKS1/ZC3H12A/TOP2B/ZNFX1/CXCR6/TNF/PPIH/ISG20/CNOT7/IFITM2/IFITM1/APOBEC3A/PCBP1/VCP/IFITM3/HTATSF1/ATG16L1/LTF/APOBEC3B/SRPK2/SMARCB1/CCL5/PLSCR1/OAS1/ILF3/APOBEC3G/MAVS/TRIM28/TRIM38/LARP1/DEK/RNASEL/SLPI/STOM/PPIB/MX1/NFIA/TRIM6/IFIT1/OAS3/IFIH1/DDB1/OAS2/ATG16L2/TOP2A/SRPK1	54
BP	GO:0050853	B cell receptor signaling pathway	54/5019	130/18903	0.000142491132604728	0.00169347268006437	0.00123616842490582	BLK/CD22/MS4A1/FCRL3/LCK/CD79A/ITK/TEC/SH2B2/PLEKHA1/PIK3CD/SLC39A10/ABL1/CTLA4/PLCL2/LYN/FCGR2B/CD38/BMX/CD19/NFAM1/IGHM/IGHV2-26/MAPK1/PRKCH/PTPRC/PLCG2/MNDA/CD300A/GCSAML/IGHV4-39/PRKCB/BLNK/BANK1/SYK/IGLL1/IGHV4-59/CD79B/IGHV4-34/IGHV2-5/PTPN6/IGHV2-70/IGHV4-31/PTPN22/STAP1/IGHV4-61/IGHV3-21/IGHV3-7/VAV3/IGHV3-64/IGHV3-53/IGHV3-11/NFATC2/IGHV3-38	54
BP	GO:0051028	mRNA transport	54/5019	130/18903	0.000142491132604728	0.00169347268006437	0.00123616842490582	XPO1/ZFP36L1/LRPPRC/SEH1L/HNRNPA1L2/HNRNPA1/POLR2D/THOC1/NUP133/NCBP2/NUP107/NDC1/FYTTD1/IGF2BP2/NXF1/NCBP1/NUP43/MVP/NUP160/NPIPA1/MAGOHB/THOC7/KHSRP/UPF1/EIF4A3/ZFP36/MX2/NUTF2/DHX9/RBM15B/NSUN2/NUP35/CETN3/NUP54/CASC3/UPF3A/NUP155/NUP37/THOC2/NUP205/NUP188/UPF2/PCID2/SRSF1/AGFG1/HHEX/RBM8A/TNKS/IWS1/UPF3B/NUP88/SRSF3/RANBP17/RANBP2	54
BP	GO:0019216	regulation of lipid metabolic process	123/5019	347/18903	0.00014404553327094	0.00170877020358885	0.00124733501518084	FLT3/CCR7/ADM/PPARD/CDK4/IFNG/BCL11B/LDLRAP1/POR/KIT/IL1A/CPT1A/EPHX2/STOML2/MTMR1/MTMR2/PIP4K2C/NR1H2/DGAT2/PIK3IP1/EDF1/PIBF1/FGR/TNF/ABCD2/ERLIN1/NR1D1/RORA/MBTPS2/SNAI1/ID2/MTMR3/CEACAM1/NOD2/CRTC3/TBL1XR1/ADIPOR1/SEC14L2/LPCAT1/PIP4K2B/PRMT3/STAT5B/LDLR/IGFBP7/MLST8/PRKCD/TTC39B/SAMD8/HCAR2/REST/WDTC1/DDX20/PNPLA2/AKT1/PTK2B/ABCA7/TSPO/LYN/DNAJC19/LACTB/SCARB1/PHB2/CD19/LPGAT1/LONP2/IL1B/RNF…	123
BP	GO:0000469	cleavage involved in rRNA processing	17/5019	28/18903	0.000146615761370202	0.00172963317011268	0.00126256415986692	NOB1/TSR1/RPS21/EXOSC2/NOP14/NHP2/RPP40/BMS1/EXOSC8/ERI2/UTP20/KRI1/EXOSC10/NOL9/RCL1/EXOSC9/RRS1	17
BP	GO:0001562	response to protozoan	17/5019	28/18903	0.000146615761370202	0.00172963317011268	0.00126256415986692	IL4R/MYD88/CD40/SLC11A1/BCL3/IRF4/PF4/CLEC7A/MIRLET7I/BATF/ARG1/GBP2/NKG7/IL10/DEFA1B/IRF8/BPGM	17
BP	GO:0032703	negative regulation of interleukin-2 production	17/5019	28/18903	0.000146615761370202	0.00172963317011268	0.00126256415986692	GATA3/XCL1/TBX21/NOD2/LILRB4/ZFP36/CR1/GBP1/PTPRC/EZR/TNFAIP3/CD34/LAPTM5/HOMER3/HAVCR2/HOMER2/PRNP	17
BP	GO:0008380	RNA splicing	160/5019	469/18903	0.000148960140890789	0.00175405366640093	0.00128039016130612	C1QBP/NPM1/DDX1/RBM11/CLNS1A/TADA2B/DHX16/HNRNPA1L2/KDM1A/NCL/SYNCRIP/TADA1/HNRNPA1/USB1/TAF9/FXR1/KAT2A/THOC1/NCBP2/PUS7/SRSF10/SART1/PRMT1/JMJD6/LSM3/PPIH/NCBP1/RSRC1/SNRPD1/ZRANB2/RPS13/HNRNPR/TTF2/RBM28/SF3A3/SRSF6/ZNF326/DHX15/USP22/SNRPD2/ERN1/YBX1/U2AF1L4/MAGOHB/THOC7/RAVER2/ZCRB1/RRAGC/HSPA1A/KHSRP/EIF4A3/PRMT5/TCERG1/COIL/TSEN2/MPHOSPH10/KHDRBS1/CLK3/PRPF8/SF3B4/SCNM1/LSM7/SAP18/HNRNPA3/…	160
BP	GO:0001836	release of cytochrome c from mitochondria	28/5019	56/18903	0.000149479889016978	0.00175693825436499	0.0012824957970226	TIMM50/MMP9/FAM162A/BCL2L11/TRIAP1/PDCD5/GGCT/DNM1L/SOD2/FXN/CLU/PPIF/ARRB2/PINK1/AKT1/PLAUR/OPA1/PLSCR3/TNFSF10/CIDEB/BID/BNIP3/MLLT11/PRELID1/BCL2L1/LMNA/HGF/TP53	28
BP	GO:0018108	peptidyl-tyrosine phosphorylation	133/5019	380/18903	0.000150954319048067	0.00177101268989603	0.00129276958118615	FLT3/BLK/IL23A/LCK/NRG1/ITK/CD40/IFNG/EPHA4/SH2D1B/TEC/NCL/CD3E/KIT/IL6/IBTK/HES1/LILRA5/HDAC2/PTPN11/CLEC6A/PIBF1/FGR/TNFRSF14/SH3BP5/PDCL3/TNF/MAPK3/MAP2K3/UNC119/SH3BP5L/EHD4/ITGB2/CNOT7/MVP/ZAP70/IL15/SEMA4D/MAP2K6/SOCS3/NF2/NOD2/HCLS1/EPHB1/ITGB3/ABL1/LILRB4/NEDD9/CLK3/MLST8/PRKCD/HCK/MIF/IL18/MAP2K5/ARRB2/TIE1/SOCS5/WEE1/PTK2B/CHMP6/PECAM1/PTPN1/LYN/FYN/BMX/TYK2/CSK/FER/NCF1/CLK1/PTPRJ/CD4/…	133
BP	GO:0032206	positive regulation of telomere maintenance	32/5019	67/18903	0.000157611224965069	0.00184572559052501	0.00134730705898423	CCT2/GNL3/CCT6A/CCT4/CCT8/HNRNPA1/CCT7/CCT3/MAPKAPK5/DKC1/POT1/MAPK3/PARN/ACTL6A/TFPT/ERCC1/UCHL5/RUVBL1/TINF2/RAD50/CCT5/HNRNPD/NAF1/ATR/TERF2/MAPK1/XRCC5/ACTR8/TERF1/TNKS/RUVBL2/ATM	32
BP	GO:0032204	regulation of telomere maintenance	44/5019	101/18903	0.000158793287282818	0.00185616869997503	0.00135493011798714	CCT2/GNL3/CCT6A/CCT4/CCT8/HNRNPA1/CCT7/CCT3/MAPKAPK5/DKC1/NAT10/POT1/MAPK3/PARN/ACTL6A/TFPT/CTC1/ERCC1/UPF1/UCHL5/YLPM1/HDAC8/RUVBL1/TINF2/PARP1/HNRNPC/NSMCE4A/RAD50/CCT5/HNRNPD/NSMCE1/NAF1/ATR/TERF2/EXOSC10/SMC5/MAPK1/XRCC5/ACTR8/MYC/TERF1/TNKS/RUVBL2/ATM	44
BP	GO:0031647	regulation of protein stability	116/5019	325/18903	0.000159625596683879	0.00186249281970205	0.00135954647655843	NPM1/BAG3/CCT2/UXT/FLOT2/TRIM39/EPHA4/CCT6A/CCT4/CCT8/RPL11/CCT7/CALR/CCT3/SUGT1/NAA15/PRKDC/TAF9/KAT2A/URI1/PDCL3/TRIM24/TMEM88/NR1D1/PFDN2/IFT46/GTPBP4/RPS7/SMAD7/PRKRA/HSP90AB3P/FLOT1/SERF2/HSPA1A/NF2/HDAC8/HSPA1B/STXBP4/RUVBL1/PRKCD/DAZAP2/DDOST/HSP90AB1/LRRK2/SOX4/CLU/USP3/HYPK/CCT5/PINK1/PFDN4/TARDBP/GRN/ATP1B1/PTGES3/CTSH/TTI1/PIM2/STK4/RNF5/QRSL1/PHB2/RAB21/GGA3/USP40/DVL3/TRIM21/MAPK1/TY…	116
BP	GO:0030889	negative regulation of B cell proliferation	13/5019	19/18903	0.000161894784425396	0.0018821004574836	0.00137385928065494	BLK/CTLA4/LYN/FCGR2B/TYROBP/IL10/CASP3/MNDA/CD300A/RC3H1/ATM/PTEN/TNFRSF21	13
BP	GO:0035743	CD4-positive, alpha-beta T cell cytokine production	13/5019	19/18903	0.000161894784425396	0.0018821004574836	0.00137385928065494	GATA3/XCL1/IL6/SLAMF1/TBX21/IL18/DENND1B/IL18R1/ARG1/IL1B/IL1R1/NLRP3/ARID5A	13
BP	GO:0045943	positive regulation of transcription by RNA polymerase I	19/5019	33/18903	0.000162284344135629	0.00188320525663015	0.00137466574056239	NCL/WDR43/NOL11/HEATR1/PWP1/SMARCA4/WDR75/UBTF/MYBBP1A/UTP15/EIF2AK3/SMARCB1/DHX33/SMARCA5/SF3B1/DEK/ACTR6/DDX11/BAZ1B	19
BP	GO:1903311	regulation of mRNA metabolic process	111/5019	309/18903	0.000163786547162046	0.0018971941712937	0.00138487709785757	C1QBP/NPM1/ZFP36L1/RBM11/FASTKD1/PAIP1/CLNS1A/GTPBP1/MYD88/AXIN2/SLC11A1/NCL/SYNCRIP/APEX1/HNRNPA1/POLR2D/SERBP1/FASTKD2/EXOSC2/ZC3H12A/PATL1/FXR1/DIS3/TTC5/NCBP2/SRSF10/JMJD6/PNPT1/PARN/EXOSC8/IGF2BP2/NCBP1/NUDT21/PATL2/ZC3H14/YTHDF2/TNRC6C/CNOT7/SRSF6/HNRNPAB/DHX34/ZC3H12D/YBX1/RAVER2/KHSRP/UPF1/EIF4A3/PRMT5/PAF1/TOB1/KHDRBS1/ZFP36/EXOSC5/PRKCD/SF3B4/SAP18/TIA1/RBM23/DAZAP1/DHX9/BTG2/PAN3/RBM15…	111
BP	GO:0006611	protein export from nucleus	29/5019	59/18903	0.000168465637577269	0.00194786489451909	0.00142186473211689	XPO1/DUSP16/BAG3/RAN/SIRT7/XPO6/XPO4/CALR/PTPN11/CTDSPL2/XPO5/CSE1L/PRKACA/NUTF2/PKD1/TCF7L2/TXN/IL1B/STRADA/EGR2/ANP32B/SP100/FRAT1/YWHAE/CHP1/PTPN14/TGFB1/DESI1/RANBP17	29
BP	GO:0001913	T cell mediated cytotoxicity	26/5019	51/18903	0.000170257570369073	0.00196148991881054	0.00143181046375812	IL23A/XCL1/IL7R/GZMM/LILRB1/KLRD1/KLRC1/CEACAM1/HPRT1/CTSH/PRF1/FCGR2B/MR1/TAP2/RIPK3/HLA-E/HLA-F/PTPRC/HLA-A/HLA-B/CD1D/IL12RB1/HLA-H/STX7/P2RX7/CD1C	26
BP	GO:0019083	viral transcription	26/5019	51/18903	0.000170257570369073	0.00196148991881054	0.00143181046375812	INPP5K/NUCKS1/LEF1/SMARCA4/ZFP36/TFAP4/DHX9/REST/PSMC3/IFITM3/TARDBP/RRP1B/CCL4/USF1/ZNF639/SMARCB1/MON1B/TRIM21/CCL5/HEXIM1/TRIM8/CCL3/JUN/CCNT2/MID2/CCNT1	26
BP	GO:0032722	positive regulation of chemokine production	33/5019	70/18903	0.000171183282748418	0.0019650734468463	0.00143442629822638	IL4R/MYD88/FFAR2/IFNG/IL6/TNF/HMOX1/MBP/C5/NOD2/MIF/IL18/CLEC7A/HMGB1/IL1B/OAS1/MAVS/IL17RA/HIF1A/TLR7/TLR4/F2RL1/OAS3/CSF1R/HAVCR2/SYK/APP/MCOLN2/TLR2/LGALS9/AZU1/IL1RL1/EGR1	33
BP	GO:0042130	negative regulation of T cell proliferation	33/5019	70/18903	0.000171183282748418	0.0019650734468463	0.00143442629822638	XCL1/CD274/GLMN/LILRB1/CRTAM/TNFRSF14/PDE5A/LILRB2/BTN2A2/TWSG1/LILRB4/CR1/CTLA4/SPN/PDCD1LG2/ARG1/ZBTB7B/DLG1/PRKAR1A/LGALS9C/IL10/CASP3/RC3H1/LGALS9B/PELI1/HAVCR2/CD86/CBLB/PTEN/TNFRSF21/LGALS9/PRNP/PTPN6	33
BP	GO:0000819	sister chromatid segregation	89/5019	239/18903	0.000174426425078181	0.0019987142687274	0.00145898277456453	SEH1L/PDS5A/AXIN2/RAN/CHMP7/SMARCC1/ANAPC5/PIBF1/TOP2B/CDC23/CHMP2A/ANAPC7/ACTL6A/ANAPC1/SMARCA4/EML4/HORMAD1/CHMP1A/CDC16/HDAC8/CHMP4B/PHF10/ZWILCH/SMARCE1/ZW10/DUSP1/MAU2/PBRM1/KNTC1/CHMP6/SMARCA2/SMARCD3/SMC2/SFPQ/CHMP3/DSCC1/BRD7/ARID1B/PHB2/STAG3L2/SMARCB1/STAG3L1/SMC5/PTTG2/STAG3L3/SPDL1/SMC3/FBXW7/KATNB1/MAD2L1/MIS12/ANAPC15/SMARCA5/RIOK2/PCID2/TRIP13/NCAPD3/SMC4/KAT2B/STAG3L4/TTN/KPNB1/CH…	89
BP	GO:0045069	regulation of viral genome replication	39/5019	87/18903	0.00017748271896029	0.00203009750452969	0.00148189130189234	N4BP1/CD28/INPP5K/TNIP1/OASL/PPIA/TOP2B/ZNFX1/TNF/PPIH/ISG20/CNOT7/IFITM2/IFITM1/APOBEC3A/IFITM3/LTF/APOBEC3B/SRPK2/CCL5/PLSCR1/OAS1/ILF3/APOBEC3G/MAVS/TRIM28/TRIM38/LARP1/RNASEL/SLPI/MX1/TRIM6/IFIT1/OAS3/IFIH1/DDB1/OAS2/TOP2A/SRPK1	39
BP	GO:0043434	response to peptide hormone	145/5019	421/18903	0.000182755172724529	0.00208667245428685	0.00152318878921158	ADM/ZFP36L1/ALPL/PXN/INPP5K/CDK4/SLC9A1/NCL/SESN2/POR/APEX1/SLC24A4/GSK3A/CYP1B1/APPL1/SMARCC1/PRKDC/PIP4K2C/XBP1/NUCKS1/FOXO4/TGFBR3/SH2B2/PTPN11/EEF2K/HADH/VAMP2/PNPT1/SOGA1/RETN/PRKCI/SRSF6/CEACAM1/ZDHHC7/EDN1/APRT/GRB2/SOCS3/YWHAG/ITGB3/ADIPOR1/PIP4K2B/FOXO1/STXBP4/CCND3/STAT5B/PRKCD/PARP1/PLCB1/CYC1/BTG2/AGTRAP/USO1/NR4A1/WDTC1/PTPRE/NDEL1/EIF2B3/AKT1/GNAI2/RAP1GDS1/NCOA1/RELA/STAT4/USF1/CFL…	145
BP	GO:0002726	positive regulation of T cell cytokine production	16/5019	26/18903	0.000184265316638076	0.00209270414668536	0.00152759168733894	GATA3/XCL1/IL6/SLAMF1/TBX21/SASH3/CD55/IL18/DENND1B/IL18R1/IL1B/IL1R1/NLRP3/HLA-A/MALT1/ARID5A	16
BP	GO:0035872	nucleotide-binding domain, leucine rich repeat containing receptor signaling pathway	16/5019	26/18903	0.000184265316638076	0.00209270414668536	0.00152759168733894	SLC15A4/SLC15A3/SLC46A2/MAP2K6/HSPA1A/NOD2/HSPA1B/BIRC3/RELA/NFKBIA/TNFAIP3/SLC15A2/CYLD/TLR4/IRGM/PTPN22	16
BP	GO:0046629	gamma-delta T cell activation	16/5019	26/18903	0.000184265316638076	0.00209270414668536	0.00152759168733894	TCF7/ITK/GPR18/CD3E/LILRB1/MICB/CD247/CD3G/LEF1/KLRC1/NOD2/STAT5B/SOX4/EGR3/PTPRC/SYK	16
BP	GO:0019885	antigen processing and presentation of endogenous peptide antigen via MHC class I	12/5019	17/18903	0.000186146519806974	0.0021065855710545	0.00153772458094853	TAPBP/HFE/TAP1/TAP2/HLA-E/HLA-F/HLA-A/HLA-B/HLA-C/IDE/HLA-H/ERAP1	12
BP	GO:0061158	3'-UTR-mediated mRNA destabilization	12/5019	17/18903	0.000186146519806974	0.0021065855710545	0.00153772458094853	ZFP36L1/ZC3H12A/ZC3H12D/KHSRP/UPF1/ZFP36/HNRNPD/TARDBP/CPEB3/RC3H1/TRIM71/ZFP36L2	12
BP	GO:0061614	miRNA transcription	30/5019	62/18903	0.000187095984367615	0.00211358961845677	0.00154283725997025	MYB/PPARD/GATA3/GNL3/RARA/NR1H2/TNF/ETS1/ZNF512B/SMARCA4/SPI1/KLF5/LILRB4/REST/RELA/WT1/FOXO3/MYC/GATA2/IL10/STAT3/HIF1A/KLF4/FOS/JUN/SMAD1/SMAD3/TGFB1/TP53/EGR1	30
BP	GO:0070266	necroptotic process	24/5019	46/18903	0.000189809500589281	0.00214046198724491	0.00156245303186275	ZBP1/RBCK1/TNF/TRPM7/CASP6/BIRC3/AIFM1/FASLG/DNM1L/PARP1/PPIF/PGAM5/MLKL/IPMK/CFLAR/ITPK1/RIPK3/OGT/CYLD/FAS/PELI1/PYGL/TP53/CAV1	24
BP	GO:0018212	peptidyl-tyrosine modification	133/5019	382/18903	0.0001956651643172	0.00220261102226087	0.00160781938210242	FLT3/BLK/IL23A/LCK/NRG1/ITK/CD40/IFNG/EPHA4/SH2D1B/TEC/NCL/CD3E/KIT/IL6/IBTK/HES1/LILRA5/HDAC2/PTPN11/CLEC6A/PIBF1/FGR/TNFRSF14/SH3BP5/PDCL3/TNF/MAPK3/MAP2K3/UNC119/SH3BP5L/EHD4/ITGB2/CNOT7/MVP/ZAP70/IL15/SEMA4D/MAP2K6/SOCS3/NF2/NOD2/HCLS1/EPHB1/ITGB3/ABL1/LILRB4/NEDD9/CLK3/MLST8/PRKCD/HCK/MIF/IL18/MAP2K5/ARRB2/TIE1/SOCS5/WEE1/PTK2B/CHMP6/PECAM1/PTPN1/LYN/FYN/BMX/TYK2/CSK/FER/NCF1/CLK1/PTPRJ/CD4/…	133
BP	GO:0002637	regulation of immunoglobulin production	35/5019	76/18903	0.000196460196003853	0.00220767397758987	0.00161151514028505	CD22/IL4R/FCRL3/CD28/CD40/CD40LG/XCL1/IL6/SLC15A4/XBP1/MSH2/THOC1/TNF/TBX21/SASH3/CR1/TP53BP1/BCL6/RIF1/MLH1/EXOSC6/FCGR2B/PHB2/APLF/HLA-E/PTPRC/TMBIM6/IL10/ATAD5/STAT6/CD86/TGFB1/TFRC/IL27RA/TNFSF13	35
BP	GO:0030101	natural killer cell activation	43/5019	99/18903	0.000203287399042508	0.00227639164532014	0.00166167633395609	IL21R/IL23A/NCR3/SLAMF7/GATA3/IL2RB/KIR3DS1/RASGRP1/NCR1/SLAMF1/CD2/KLRD1/PIBF1/FGR/PIK3CD/KLRC1/FCGR3A/HECTD1/IL15/BLOC1S3/STAT5B/KLRC2/PRDM1/IL18/PGLYRP1/KLRC3/IL18R1/TYK2/TYROBP/AP1G1/HLA-E/HLA-F/PTPRC/NKG7/SNX27/PRDX1/HAVCR2/CORO1A/UNC13D/CD244/TOX/NFIL3/PTPN22	43
BP	GO:0032602	chemokine production	43/5019	99/18903	0.000203287399042508	0.00227639164532014	0.00166167633395609	IL4R/MYD88/FFAR2/IFNG/IL6/TNF/HMOX1/MEFV/MBP/C5/SIRPA/GSTP1/NOD2/C1QTNF3/LILRB4/MIF/IL18/MAP2K5/SOCS5/CLEC7A/HMGB1/IL1B/TREM1/OAS1/MAVS/IL17RA/IL10/HIF1A/TLR7/KLF4/TLR4/F2RL1/OAS3/CSF1R/HAVCR2/SYK/APP/MCOLN2/TLR2/LGALS9/AZU1/IL1RL1/EGR1	43
BP	GO:0001914	regulation of T cell mediated cytotoxicity	22/5019	41/18903	0.000205489829691809	0.00229201390569094	0.0016730799693518	IL23A/XCL1/IL7R/LILRB1/KLRD1/KLRC1/CEACAM1/FCGR2B/MR1/TAP2/RIPK3/HLA-E/HLA-F/PTPRC/HLA-A/HLA-B/CD1D/IL12RB1/HLA-H/STX7/P2RX7/CD1C	22
BP	GO:0001771	immunological synapse formation	11/5019	15/18903	0.000206474821657488	0.00229201390569094	0.0016730799693518	CCR7/CD6/EPHB1/NEDD9/PRF1/NCK2/MSN/DLG1/LGALS3/HAVCR2/DOCK8	11
BP	GO:0009173	pyrimidine ribonucleoside monophosphate metabolic process	11/5019	15/18903	0.000206474821657488	0.00229201390569094	0.0016730799693518	UPP1/UCK2/CDA/UMPS/DHODH/UPB1/CMPK1/NT5C/CAD/DCK/DPYD	11
BP	GO:0045064	T-helper 2 cell differentiation	11/5019	15/18903	0.000206474821657488	0.00229201390569094	0.0016730799693518	IL4R/GATA3/RARA/BCL3/BCL6/IL18/SOCS5/BATF/NLRP3/CD86/HLX	11
BP	GO:0046007	negative regulation of activated T cell proliferation	11/5019	15/18903	0.000206474821657488	0.00229201390569094	0.0016730799693518	CD274/CRTAM/BTN2A2/LILRB4/PDCD1LG2/ARG1/PRKAR1A/CASP3/RC3H1/LGALS9/PRNP	11
BP	GO:0046643	regulation of gamma-delta T cell activation	9/5019	11/18903	0.000208184126290099	0.00229622470141304	0.00167615368455055	TCF7/LILRB1/LEF1/NOD2/STAT5B/SOX4/EGR3/PTPRC/SYK	9
BP	GO:0070203	regulation of establishment of protein localization to telomere	9/5019	11/18903	0.000208184126290099	0.00229622470141304	0.00167615368455055	CCT2/CCT6A/CCT4/CCT8/CCT7/CCT3/DKC1/CCT5/TERF1	9
BP	GO:0002220	innate immune response activating cell surface receptor signaling pathway	18/5019	31/18903	0.000208290636036841	0.00229622470141304	0.00167615368455055	FFAR2/KIR2DS2/KLRD1/CLEC6A/LILRA2/KLRC4/FCN1/KLRC2/KLRC3/CLEC7A/LYN/FYN/FCN2/TYROBP/CREBBP/PLCG2/PAK1/SYK	18
BP	GO:0002507	tolerance induction	18/5019	31/18903	0.000208290636036841	0.00229622470141304	0.00167615368455055	BLK/CD3E/CD274/ICOS/LILRB2/TGFBR2/PHLPP1/LILRB4/XKR8/CCR4/LYN/HMGB1/HLA-E/TNFAIP3/HLA-B/HAVCR2/CBLB/LGALS9	18
BP	GO:1902106	negative regulation of leukocyte differentiation	46/5019	108/18903	0.000216150990173726	0.00237877698996696	0.00173641360708452	IL4R/CDK6/GPR137B/LILRB3/RARA/LILRB1/ZC3H12A/TBX21/SMAD7/ID2/IRF1/CEACAM1/ZNF675/LILRB4/CR1/CTLA4/RUNX3/BCL6/PGLYRP1/ZC3H8/SOCS5/CBFB/TMEM176B/LYN/LTF/FCGR2B/MAFB/ZBTB7B/HMGB1/TMEM176A/TNFAIP6/FBXW7/MYC/GATA2/JAK3/TRIB1/RC3H1/CCL3/TLR4/PIK3R1/HOXA7/FGL2/HMGB3/HLX/NF1/INHBA	46
BP	GO:0070424	regulation of nucleotide-binding oligomerization domain containing signaling pathway	10/5019	13/18903	0.000216843041677276	0.00238229279808334	0.00173898000867615	SLC15A4/SLC15A3/SLC46A2/HSPA1A/HSPA1B/BIRC3/TNFAIP3/SLC15A2/TLR4/PTPN22	10
BP	GO:0030003	cellular cation homeostasis	168/5019	499/18903	0.000217545187442106	0.00238590725300999	0.00174161841855791	CCR7/ATP6V0C/SLC9A8/LCK/CYB561A3/STEAP4/LCN2/CD40/SLC9A1/IFNG/SLC11A1/GRINA/SLC30A4/XCL1/SLC24A4/IL1A/HFE/IBTK/CALR/PKD2/STOML2/KCTD7/AFG3L2/THADA/ATP6V0D1/CDH23/LETM1/UBE3A/ATP2C1/SLC24A1/KCNJ2/SLAMF8/SLC30A5/MAPK3/HMOX1/SLC26A6/SLC4A10/SCO1/ATP2C2/PRKACA/SLC30A9/ATP6V0A2/SLC39A10/EDN1/TRPM7/GLRX3/HSP90B1/ABCB7/CCR1/IMMT/ITGB3/TMTC4/MICU1/ABL1/RASA3/FASLG/LRRK2/FXN/TMEM175/SLC9A9/TM9SF4/STIM2/HE…	168
BP	GO:0072527	pyrimidine-containing compound metabolic process	37/5019	82/18903	0.000218783806036727	0.00239128830051082	0.0017455463715103	UPP1/UCK2/NME2/CTPS2/NEIL1/CDA/DCTPP1/UMPS/NME7/NME1/UNG/DCTD/AK3/CTPS1/ALDH6A1/APOBEC3A/TDG/DHODH/UPB1/DUT/CMPK1/TYMP/NT5C/APOBEC3B/ENTPD4/TYMS/CAD/MAPK1/DCK/APOBEC3G/NME4/TPK1/DPYD/TET2/SLC25A19/TET1/CDADC1	37
BP	GO:1905897	regulation of response to endoplasmic reticulum stress	37/5019	82/18903	0.000218783806036727	0.00239128830051082	0.0017455463715103	GRINA/NR1H2/XBP1/PPP1R15A/MBTPS2/ALOX5/RNF185/BCL2L11/ERN1/HSPA1A/CREB3/LRRK2/CLU/HERPUD1/ATXN3/USP14/EIF2AK3/ABCA7/PTPN1/FCGR2B/OPA1/NCK2/USP13/PPP1R15B/TMBIM6/DDIT3/MANF/UBQLN2/PIK3R1/BCL2L1/UFL1/RNFT1/LPCAT3/SVIP/CAV1/HYOU1/HSPA5	37
BP	GO:0043487	regulation of RNA stability	72/5019	187/18903	0.000222385625983698	0.00242650800774704	0.0017712553720347	NPM1/ZFP36L1/FASTKD1/PAIP1/MYD88/AXIN2/SLC11A1/SYNCRIP/APEX1/POLR2D/SERBP1/FASTKD2/EXOSC2/ZC3H12A/PATL1/DKC1/FXR1/DIS3/PNPT1/PARN/EXOSC8/IGF2BP2/PATL2/ZC3H14/YTHDF2/TNRC6C/CNOT7/TNFRSF1B/ZC3H12D/YBX1/KHSRP/UPF1/TOB1/ZFP36/EXOSC5/PRKCD/DHX9/BTG2/PAN3/ELAVL1/HNRNPC/NSUN2/PHAX/HNRNPD/TARDBP/AKT1/RBM38/HNRNPA0/PUM2/CPEB3/METTL14/MLH1/DCP1B/NAF1/CNOT2/METTL3/CSDE1/MAPK14/POLR2G/PCID2/ROCK2/LARP1/EXOSC…	72
BP	GO:0043406	positive regulation of MAP kinase activity	49/5019	117/18903	0.000223927533501666	0.00243916976015273	0.00178049795310031	FLT3/CD40/EPHA4/KIT/RASGRP1/RPS3/PDE5A/TNF/PIK3R5/EDN1/ERN1/MAP2K6/ADAM8/NOD2/S100A12/LRRK2/MIF/MAP3K11/MAP2K5/PTK2B/SASH1/PTPN1/CSK/ADAM9/FGD2/DVL3/IL1B/TGFA/PTPRC/PIK3R6/VEGFA/AKAP13/TLR6/TAOK3/TLR4/CD24/INSR/PSEN1/EPGN/PAK1/TGFB1/SYK/THBS1/PIK3CG/EZH2/P2RX7/MAGED1/MAP3K5/PDGFC	49
BP	GO:0006986	response to unfolded protein	57/5019	141/18903	0.000224843036894866	0.00244497683317309	0.00178473688791951	DNAJB2/HSPA6/BAG3/DNAJB1/HSPA1L/MFN2/HSPA7/XBP1/ERP27/PPP1R15A/STT3B/TM7SF3/HSPA2/RHBDD2/MBTPS2/ERMP1/BCL2L11/ERN1/HSPA1A/HSPA4/CREB3/HSPA1B/TMTC4/EIF2S1/CREB3L4/VCP/HSP90AB1/HERPUD1/ERLEC1/EIF2AK3/DNAJC10/ABCA7/PTPN1/TOR1B/TMED2/NCK2/DERL1/MBTPS1/CREBRF/PPP1R15B/TRAM1/HSPB1/TMBIM6/HSPA13/CDK5RAP3/OPTN/YOD1/HSPE1/DDIT3/MANF/CREBZF/HSPH1/PIK3R1/THBS1/UFL1/EDEM3/HSPA5	57
BP	GO:0050855	regulation of B cell receptor signaling pathway	15/5019	24/18903	0.000230187108228743	0.00249883933788553	0.00182405439708023	BLK/CD22/FCRL3/SLC39A10/PLCL2/LYN/FCGR2B/CD19/NFAM1/PRKCH/CD300A/GCSAML/PRKCB/PTPN22/STAP1	15
BP	GO:0044772	mitotic cell cycle phase transition	160/5019	473/18903	0.000236104863323901	0.00255873643405597	0.00186777692056766	ZFP36L1/CDK6/RPL26/CDK4/TRIM39/SIRT7/CCNJL/APEX1/DNM2/RNASEH2B/CHMP7/RPL24/RAD17/RPS6/APPL1/NAE1/CUL5/KLHL18/PKD2/SMARCC1/ANAPC5/PRKDC/MECP2/FOXO4/CPSF3/RCC1/BLM/CCNG1/CDC23/HSPA2/CHMP2A/CENPJ/PLK3/BTN2A2/GPR132/ID2/E2F6/ANAPC7/ACTL6A/ANAPC1/SMARCA4/TRIAP1/CTC1/CDC16/RCC2/CHMP4B/PHF10/ZWILCH/KHDRBS1/SMARCE1/CCND3/ANKRD17/LSM11/ZW10/TFAP4/DUSP1/PLCB1/MTBP/PBRM1/CCNJ/RAD50/WEE1/KNTC1/AKT1/PKD1/PIM2…	160
BP	GO:0002711	positive regulation of T cell mediated immunity	29/5019	60/18903	0.000243944060762673	0.00263899034396197	0.00192635911712088	IL23A/GATA3/XCL1/IL6/SLAMF1/TBX21/SASH3/CD55/IL18/DENND1B/IL18R1/IL1B/MR1/TAP2/IL1R1/HLA-E/HLA-F/NLRP3/PTPRC/HLA-A/HLA-B/CD1D/MALT1/IL12RB1/ARID5A/HLA-H/STX7/P2RX7/CD1C	29
BP	GO:0006898	receptor-mediated endocytosis	94/5019	257/18903	0.000244335671508521	0.00263899034396197	0.00192635911712088	ADM/CXCR1/FCHO1/CXCL16/LDLRAP1/DNM2/HFE/MTMR2/LILRB1/CXCR2/ANKRD13A/UNC119/TBC1D5/ITGB2/CEACAM1/TGFBR2/MARCO/DBNL/DPP4/PDLIM7/GRB2/FLOT1/ARHGAP27/NUMB/ITGB3/LILRB4/CD14/LDLR/RIN3/SYNJ1/RABGEF1/AHI1/CLU/CAP1/ARRB2/ITGAM/CANX/ARRB1/PIKFYVE/IGF2R/ITGA4/ARF6/FCGR2B/BICD1/ANKRD13B/RAB21/FCER1G/RALB/LRP1/RNASEK/DNM1/ANGPT1/CTTN/PICALM/RALA/AP1G1/DNM3/SDCBP/ATAD1/RAB31/LMBR1L/LMBRD1/PPT1/HSPG2/SLC9B2/SI…	94
BP	GO:0048525	negative regulation of viral process	40/5019	91/18903	0.00024611156235955	0.00265368858301342	0.0019370882533101	N4BP1/INPP5K/TNIP1/OASL/PPIA/ZNFX1/TNF/ISG20/IFITM2/IFITM1/APOBEC3A/FCN1/ZFP36/TRIM26/IFITM3/LTF/APOBEC3B/SRPK2/TRIM21/CCL5/PLSCR1/OAS1/ILF3/APOBEC3G/HEXIM1/MAVS/TRIM28/TRIM25/TRIM8/RNASEL/SLPI/PTX3/MX1/TRIM6/IFIT1/OAS3/IFIH1/MID2/OAS2/SRPK1	40
BP	GO:0016601	Rac protein signal transduction	23/5019	44/18903	0.000247881489818062	0.00266378864856586	0.00194446090376521	DNM2/TIAM1/RAC2/STMN3/DBNL/RHOG/ARAP3/GABARAP/ARF6/ALS2/ARHGAP24/NCKAP1/SH3BP1/OGT/ELMO1/HACE1/WASF2/SSX2IP/RHOH/PIK3CG/NF1/WASF1/RHOU	23
BP	GO:1903573	negative regulation of response to endoplasmic reticulum stress	23/5019	44/18903	0.000247881489818062	0.00266378864856586	0.00194446090376521	GRINA/NR1H2/XBP1/PPP1R15A/ALOX5/HSPA1A/CREB3/LRRK2/CLU/HERPUD1/USP14/ABCA7/PTPN1/OPA1/NCK2/PPP1R15B/TMBIM6/BCL2L1/UFL1/LPCAT3/SVIP/HYOU1/HSPA5	23
BP	GO:0051170	import into nucleus	66/5019	169/18903	0.000248891487899492	0.00267015465374053	0.00194910783706526	IPO7/BAG3/IPO5/IFNG/BACH2/RAN/HNRNPA1/APPL1/ZC3H12A/NUP133/BCL3/NUP107/CSE1L/HCLS1/PRKCD/NUTF2/HSP90AB1/LRRK2/ELAVL1/AKIRIN2/NUP35/NUP54/TARDBP/AKT1/RPAIN/STK4/NUP155/NOLC1/PHB2/TXNIP/MAPK14/ANGPT1/EFCAB7/RANBP6/FAM53C/NUP188/E2F3/UFM1/KPNA5/IPO9/MAVS/TRIM28/NFKBIA/JUP/STAT3/KPNB1/TRAF3IP2/CHP1/HTATIP2/PTGS2/NUP88/PSEN1/KPNA2/SMAD3/PIK3R1/TGFB1/CDKN1A/SYK/CBLB/LMNA/NF1/CD36/RANBP17/TP53/RANBP2/FE…	66
BP	GO:0006801	superoxide metabolic process	34/5019	74/18903	0.000254524151294831	0.00272600908438718	0.00198987937378344	CD177/FPR2/ITGB2/EDN1/GSTP1/NCF2/PRKCD/SOD2/IMMP2L/ITGAM/GNAI2/CLEC7A/GCH1/NCF1/TYROBP/PREX1/NCF1B/BST1/NCF1C/SH3PXD2B/HVCN1/NQO1/CYBB/NCF4/PRDX1/F2RL1/GNAI3/TGFB1/SYK/CYBA/CD36/SOD1/ALOX12/MPO	34
BP	GO:0010823	negative regulation of mitochondrion organization	26/5019	52/18903	0.000255050388463747	0.00272707723049699	0.00199065907841622	SLC25A5/HUWE1/TRIAP1/HSPA1A/FXN/CLU/PPIF/ARRB2/PINK1/AKT1/TSPO/OMA1/SLC35F6/OPA1/SLC25A6/ACAA2/BNIP3/GCLC/PRELID1/BCL2L1/TFRC/TMEM14A/LMNA/HGF/TP53/VAT1	26
BP	GO:0043547	positive regulation of GTPase activity	102/5019	283/18903	0.000256063852315723	0.00273334269066233	0.00199523261781551	CCR7/RASGRF2/XCL2/CD40/DOCK9/IQSEC1/WDR41/XCL1/RASGRP1/VAV1/MYO9A/RGL1/DOCK7/TBC1D22A/SNX18/GMIP/TBC1D5/S1PR1/TIAM1/GPR65/RALGPS1/TBC1D8/TBC1D25/SEMA4D/ARHGAP27/RGS14/RCC2/AGAP5/RHOG/AGAP11/NEDD9/CCL20/ASAP1/TBC1D13/ARAP3/AGAP9/ZC3H15/RAPGEF1/RAP1A/DENND1B/NDEL1/TBCK/RAP1GAP2/TBC1D10C/SMCR8/RAP1GDS1/PTK2B/CCL4/TBC1D7/CDKL5/SIPA1L1/ALS2/ARAP1/TBC1D9/DVL3/NET1/RASGRP4/ARHGAP25/AGAP4/CCL5/TBC1D9B/PR…	102
BP	GO:0090316	positive regulation of intracellular protein transport	62/5019	157/18903	0.000264527003866639	0.00281897610453882	0.0020577416406047	BAG3/IPO5/IFNG/HSPA1L/RAN/GSK3A/XPO4/ZC3H12A/CTDSPL2/VAMP2/ZFAND1/PCM1/CEP290/PLK3/PRKACA/ITGB2/HUWE1/RAC2/CSNK2A2/OAZ2/HCLS1/PDCD5/PRKCD/HSP90AB1/GZMB/TM9SF4/ANK3/PCNT/ITGAM/PINK1/TARDBP/TCF7L2/OAZ1/FYN/MAPK8/MAPK14/IL1B/EFCAB7/ANP32B/BCAS3/FBXW7/MAVS/TRIM28/UBE2D3/YWHAE/JUP/CHP1/STOM/PTGS2/HPS4/PSEN1/PRKAA1/SMAD3/PIK3R1/KIF20B/TGFB1/ZDHHC2/RUFY3/PRNP/TMEM30A/SORL1/RHOU	62
BP	GO:2001244	positive regulation of intrinsic apoptotic signaling pathway	30/5019	63/18903	0.000267154870446685	0.00284224333050932	0.00207472580008863	LCK/RPL26/RPL11/RPS3/RPS7/PRKRA/BCL2L11/DNM1L/RAD9A/SKIL/SFPQ/PLAGL2/NCK2/STYXL1/RIPK3/FBXW7/S100A8/MYC/NACC2/S100A9/SLC9A3R1/BID/VNN1/MIR186/DDIT3/BCLAF1/SOD1/TP53/MCL1/CAV1	30
BP	GO:0009595	detection of biotic stimulus	21/5019	39/18903	0.000267776736597011	0.00284412699966991	0.00207610080446082	CRTAM/CLEC6A/NLRC4/LY96/TLR1/NOD2/PGLYRP1/CLEC7A/TSPO/SCARB1/PTPRJ/NOD1/NAIP/NLRP3/HLA-A/HLA-B/TLR6/CD1D/TLR4/PAK1/TLR2	21
BP	GO:0006310	DNA recombination	117/5019	332/18903	0.000268331647425335	0.00284529445047693	0.00207695299761532	TCF7/PPP4C/CD28/CD40/CD40LG/SMARCAD1/BCL11B/KDM1A/APEX1/IL7R/SLC15A4/TSN/PRKDC/NUCKS1/MSH2/PSMD14/THOC1/TOP2B/FAN1/WAS/BLM/PALB2/ZRANB3/MSH6/LEF1/TBX21/FANCM/UNG/CCNB1IP1/ACTL6A/TFPT/MEAF6/ERCC1/UCHL5/REV3L/WRN/RUVBL1/PARP1/TP53BP1/MCM3/MBTD1/BCL6/RIF1/MORF4L2/LIG3/MSH5/MCM4/ACTR5/NSMCE4A/RAD50/TOP3A/XRCC6/RPAIN/MLH1/NSMCE1/MCM6/PARPBP/EXOSC6/SFPQ/BATF/TCF3/HMGB1/CHEK1/GINS2/TERF2/SMC5/YEATS4/CCR…	117
BP	GO:0032677	regulation of interleukin-8 production	44/5019	103/18903	0.000270954385219415	0.00286834824353136	0.00209378135946826	MYD88/FFAR2/C5AR2/IL6/CD2/TNF/BCL3/PRKD2/TLR5/TLR1/TMSB4X/HSPA1A/TLR8/NOD2/LILRA2/HSPA1B/FCN1/CHI3L1/CD14/BCL10/MAP2K5/CLEC7A/ARRB1/RELA/HMGB1/IL1B/MAVS/NOD1/PTPRC/IL10/STAT3/TLR6/TLR7/KLF4/DDIT3/TLR4/BPI/F2RL1/RAB1A/SYK/TLR2/CD244/LGALS9/PTPN22	44
BP	GO:0032212	positive regulation of telomere maintenance via telomerase	19/5019	34/18903	0.00027658322946896	0.00291346485868951	0.00212671471337097	CCT2/CCT6A/CCT4/CCT8/HNRNPA1/CCT7/CCT3/MAPKAPK5/DKC1/POT1/MAPK3/PARN/CCT5/NAF1/ATR/MAPK1/XRCC5/TNKS/ATM	19
BP	GO:0090022	regulation of neutrophil chemotaxis	19/5019	34/18903	0.00027658322946896	0.00291346485868951	0.00212671471337097	CCR7/C1QBP/IL23A/XCL1/C5AR2/CXCR2/RAC2/EDN1/DPP4/NOD2/C5AR1/DNM1L/DAPK2/TNFAIP6/BST1/MCU/MOSPD2/MPP1/JAM3	19
BP	GO:0090322	regulation of superoxide metabolic process	19/5019	34/18903	0.00027658322946896	0.00291346485868951	0.00212671471337097	CD177/FPR2/ITGB2/GSTP1/PRKCD/ITGAM/GNAI2/CLEC7A/GCH1/TYROBP/BST1/HVCN1/F2RL1/GNAI3/TGFB1/SYK/CYBA/CD36/SOD1	19
BP	GO:0050765	negative regulation of phagocytosis	14/5019	22/18903	0.000285304166039573	0.00299545950354192	0.00218656757794394	CNN2/APPL1/SIRPA/DYSF/FCGR2B/MIR181B1/CSK/HMGB1/CD300LF/PLSCR1/CD300A/CD47/TLR2/ATG3	14
BP	GO:1902774	late endosome to lysosome transport	14/5019	22/18903	0.000285304166039573	0.00299545950354192	0.00218656757794394	CHMP7/PLEKHM1/CHMP2A/CHMP1A/CHMP4B/LRRK2/CHMP6/CHMP3/C9orf72/VPS39/CHMP2B/VPS41/CHMP1B/ARL8B	14
BP	GO:0002686	negative regulation of leukocyte migration	27/5019	55/18903	0.000287107541893374	0.00299961703082718	0.00218960240927971	GPR18/PADI2/CYP19A1/C5AR2/CNN2/SLAMF8/HMOX1/C5/DPP4/RIN3/RABGEF1/DUSP1/PLCB1/MIF/MIR128-1/AKT1/ADA/TNFAIP6/BCR/LRCH1/CD300A/HOXA7/NF1/IL27RA/CD200/CD200R1/STAP1	27
BP	GO:0043525	positive regulation of neuron apoptotic process	27/5019	55/18903	0.000287107541893374	0.00299961703082718	0.00218960240927971	GSK3A/TNF/BCL2L11/ABL1/AIFM1/FASLG/MAP3K11/ITGAM/GRN/BACE1/CASP2/GRIK5/SRPK2/ITGA1/TYROBP/FOXO3/FBXW7/NQO1/CASP3/CCL3/DDIT3/ATM/NF1/PRNP/TP53/MCL1/MYBL2	27
BP	GO:0071320	cellular response to cAMP	27/5019	55/18903	0.000287107541893374	0.00299961703082718	0.00218960240927971	ZFP36L1/RPLP0/INPP5K/KDM1A/APEX1/CYP1B1/PKD2/AQP9/EEF2K/SLC26A6/RAPGEF1/RAP1A/SLC8A1/KCNE1/WT1/SRD5A1/FDX1/PTAFR/EZR/ITPR2/KCNQ1/AKAP9/FBP1/PIK3CG/APP/ASS1/HSPA5	27
BP	GO:0006399	tRNA metabolic process	74/5019	195/18903	0.000306881859244493	0.00320098304732347	0.00233659167835508	DDX1/DTWD1/TARBP1/TRMT61B/TYW3/GTF3C3/POP5/EXOSC2/THADA/DTD2/NARS2/RPP40/METTL8/FARSA/NAT10/PUS7/YARS2/EXOSC8/THUMPD2/METTL2A/TRMT11/SSB/TRUB2/GTF3C4/GTF3C6/RPP30/ELP4/METTL2B/ELP2/TSEN2/THG1L/METTL1/TRMT13/FARSB/ADAT2/ELP3/OSGEPL1/EARS2/NSUN2/GRSF1/TRNT1/GTF3C5/ANG/FAM98A/IARS2/DUS3L/PUS10/POLR3K/FARS2/RTCB/TSEN15/TRIT1/OSGEP/WARS2/QRSL1/DTWD2/ANKRD16/EXOSC10/ELP5/TRMT10C/CDKAL1/TYW5/TRUB1/GATC/…	74
BP	GO:0007004	telomere maintenance via telomerase	32/5019	69/18903	0.000310206046589167	0.00323038674575103	0.00235805522128641	CCT2/CCT6A/CCT4/CCT8/HNRNPA1/CCT7/CCT3/MAPKAPK5/NHP2/DKC1/NAT10/POT1/MAPK3/PARN/CTC1/TINF2/HSP90AB1/HNRNPC/RAD50/CCT5/PTGES3/NAF1/ATR/TERF2/EXOSC10/MAPK1/XRCC5/TERF1/TNKS/NOP10/ATM/RPA1	32
BP	GO:0031529	ruffle organization	28/5019	58/18903	0.00031819881017499	0.00330823283294128	0.00241487980199556	CCR7/INPP5K/DEF8/PLEKHM1/PLEKHA1/ABI3/WDPCP/ICAM1/DBNL/RCC2/RHOG/EVL/FAM98A/NDEL1/ARF6/TCIRG1/LIMA1/ARHGAP24/SNX10/PFN1/SH3BP1/RDX/P2RY12/PLEK/CSF1R/CORO1C/STAP1/CAV1	28
BP	GO:0014002	astrocyte development	22/5019	42/18903	0.000323895570983831	0.00336199396245229	0.00245412331124796	ADORA2A/CDK6/IFNG/IL6/TNF/NR1D1/C5AR1/LDLR/GRN/MIR181B1/LRP1/IL1B/MIR142/S100A8/S100A9/TLR4/PSEN1/IFNGR1/TSPAN2/APP/NF1/LAMB2	22
BP	GO:0016052	carbohydrate catabolic process	61/5019	155/18903	0.00032883621475552	0.00340686018841656	0.00248687389089097	GLYCTK/OGDH/IFNG/GSK3A/PFKFB2/NEU1/ARL2/HK3/PPP1R3D/ALDOC/PPP1R3B/CHIT1/PYGM/GK/ABHD10/MLST8/DERA/LRP5/SLC2A6/GALM/GABARAPL1/PFKP/SORD/NAGA/NUDT5/AOAH/FOXK2/ENO1/MGAM/ENOSF1/PGD/FUT10/OGT/GLB1/HK1/STAT3/FUT8/HIF1A/PKM/GAA/INSR/SCARB2/PSEN1/PRKAA1/FBP1/RBKS/FUT7/CBFA2T3/MANBA/PYGL/DHTKD1/PYGB/APP/CTBS/P2RX7/HK2/TP53/BPGM/DDIT4/PGAM1/HEXB	61
BP	GO:0070265	necrotic cell death	33/5019	72/18903	0.000329767315170214	0.00340686018841656	0.00248687389089097	ZBP1/RBCK1/SLC6A6/TNF/NINJ1/ATG9A/TRPM7/CASP6/BIRC3/AIFM1/FASLG/DNM1L/PARP1/PPIF/PGAM5/TSPO/MLKL/IPMK/CFLAR/ITPK1/ALKBH7/RIPK3/OGT/BNIP3/TMEM123/CYLD/FAS/PELI1/PYGL/ASAH1/TP53/CAV1/MAP3K5	33
BP	GO:0030705	cytoskeleton-dependent intracellular transport	78/5019	208/18903	0.00033034928320586	0.00340686018841656	0.00248687389089097	BAG3/LRPPRC/UXT/FLOT2/RASGRP1/IFT74/MYO10/HSPB11/AP3S2/KXD1/SYNE2/PCM1/IFT46/IFT140/WDPCP/IFT172/AP3B2/F8A2/MAK/BLOC1S3/TUBB/COPG2/MYO1F/CLUAP1/DYNC1I2/NDEL1/IFT80/ARL8A/KIF1B/HOOK1/DYNC2LI1/AP3M1/IFT122/SFPQ/WDR35/BICD1/TTC26/RAB21/BLOC1S5/TERF2/OPA1/CCDC88A/IFT81/BLOC1S2/DYNLL1/SUN2/MAP1S/BLOC1S1/IFT88/TTC21B/HSPB1/STAU2/RABL2B/WDR19/KIFAP3/HSBP1/CCDC88C/HIF1A/FNBP1L/DYNC1H1/RHOT1/MYO5C/TUBA1B/…	78
BP	GO:0032869	cellular response to insulin stimulus	78/5019	208/18903	0.00033034928320586	0.00340686018841656	0.00248687389089097	ZFP36L1/INPP5K/CDK4/SLC9A1/NCL/GSK3A/APPL1/SMARCC1/PRKDC/PIP4K2C/XBP1/NUCKS1/FOXO4/SH2B2/PTPN11/EEF2K/VAMP2/SOGA1/PRKCI/CEACAM1/ZDHHC7/APRT/GRB2/SOCS3/YWHAG/ADIPOR1/PIP4K2B/FOXO1/STXBP4/CCND3/PRKCD/PARP1/USO1/WDTC1/PTPRE/NDEL1/AKT1/GNAI2/NCOA1/USF1/CFLAR/PTPN1/FER/ZBTB7B/IL1B/GOT1/NCOA5/SNX5/RAB31/RHOQ/SRD5A1/OGT/PDK4/DENND4C/KAT2B/CPEB2/UCP2/PIP4K2A/PKM/ZNF592/INSR/PHIP/PRKCB/GCLC/PRKAA1/FBP1/PI…	78
BP	GO:0006338	chromatin remodeling	129/5019	373/18903	0.00033162073649008	0.00341446536089786	0.00249242536756846	WBP2/MYB/NPM1/CHD1L/SET/GATA3/TADA2B/EOMES/NAP1L1/PADI2/SMARCAD1/KDM1A/CHD9/RBBP4/SMARCC1/MECP2/HDAC2/HLTF/KAT2A/SSRP1/ZNFX1/ZRANB3/MTHFR/TSPYL2/MTA1/SUV39H2/SNAI1/LMNB2/ACTL6A/TFPT/PADI4/SMYD3/SMARCA4/TTF2/RBBP7/POLE3/SETDB2/UCHL5/SUPT16H/KDM6B/PPHLN1/TADA2A/PHF10/SMARCE1/RUVBL1/CHD6/HAT1/ITGB3BP/EZH1/CFDP1/MYBBP1A/FAM172BP/PHF2/RIF1/ZDBF2/ACTR5/HNRNPC/PBRM1/KDM5B/SHPRH/NPM3/CENPV/TTI1/MBD2/KAT6…	129
BP	GO:0032102	negative regulation of response to external stimulus	148/5019	436/18903	0.000332654836364921	0.00341529382215288	0.00249303011168791	SEMA4B/C1QBP/ADORA2A/PPARD/GATA3/FPR2/GPR18/RPS19/PADI2/EPHA4/KIR2DL4/CYP19A1/THBD/C5AR2/SEMA4A/ABAT/NR1H2/LILRB1/SIGLEC10/KLRD1/MAPK7/SEMA6B/MICB/KREMEN1/ZDHHC18/FGR/TRAFD1/TNF/SLAMF8/RHBDF2/NR1D1/MEFV/RORA/NLRC5/NLRP12/KLRC1/SERPINB9/YTHDF2/ALOX5/CNOT7/PSMA1/CEACAM1/C5/SIRPA/TNFRSF1B/EDN1/SEMA4D/DPP4/GSTP1/SOCS3/NOD2/LILRA2/C1QTNF3/ST6GAL1/ZFP36/LDLR/PRKCD/RIN3/CR1/CARD16/PARP1/RABGEF1/DUSP1/HC…	148
BP	GO:0045638	negative regulation of myeloid cell differentiation	41/5019	95/18903	0.00033276947938712	0.00341529382215288	0.00249303011168791	MYB/ZFP36L1/CDK6/GPR137B/LILRB3/RARA/LILRB1/PRMT1/CEACAM1/PF4/ZNF675/PAF1/LILRB4/ZFP36/STAT5B/GPR171/PTK2B/ITPKB/LYN/LTF/GABPA/MAFB/TNFAIP6/FBXW7/LEO1/NFKBIA/MYC/GATA2/CTR9/ZBTB16/TRIB1/CCL3/TLR4/HOXA9/PIK3R1/HOXA7/HMGB3/HOXA5/NF1/MEIS1/INHBA	41
BP	GO:0043281	regulation of cysteine-type endopeptidase activity involved in apoptotic process	77/5019	205/18903	0.000339210246876608	0.00346297976224355	0.00252783897169845	TNFSF14/ADORA2A/LCK/POR/CD27/RPS3/TNF/MMP9/PDCD2/NLRC4/NLRP12/NLRP1/SERPINB9/FAM162A/BCL2L11/TRIAP1/CAAP1/PDCD5/BIRC3/AIFM1/FASLG/VCP/CARD16/BCL10/TFAP4/NR4A1/MAP2K5/REST/ARRB2/AKT1/CSNK2A1/CLEC7A/EIF2AK3/CTSH/RAF1/CFLAR/PLAUR/CASP2/HMGB1/GRAMD4/RPS6KA1/TNFSF10/ANP32B/IGBP1/S100A8/MICAL1/CASP1/CTSD/NOD1/MYC/NAIP/NLRP3/S100A9/NLE1/ARL6IP1/ST20/BID/PRDX3/VEGFA/RFFL/SH3RF1/LAPTM5/KLF4/PTGS2/HSPE1/FA…	77
BP	GO:0007040	lysosome organization	42/5019	98/18903	0.000339582156854349	0.00346297976224355	0.00252783897169845	ATP6V0C/CHMP7/AKTIP/GNPTAB/CHMP2A/TFEB/CHMP1A/CHMP4B/LRRK2/TMEM175/ATP6V0B/GRN/RAB20/HOOK1/PIKFYVE/CHMP6/TPP1/CHMP3/TCIRG1/ZKSCAN3/RNASEK/ATP6V0A1/ACP2/MBTPS1/PPT1/VPS18/CHMP2B/ABCA1/LAPTM5/GAA/RAB7A/SCARB2/ATP6V1D/HPS4/CHMP1B/CORO1A/HEXA/ARL8B/LAPTM4B/P2RX7/ATP6AP2/HEXB	42
BP	GO:0032642	regulation of chemokine production	42/5019	98/18903	0.000339582156854349	0.00346297976224355	0.00252783897169845	IL4R/MYD88/FFAR2/IFNG/IL6/TNF/HMOX1/MEFV/MBP/C5/SIRPA/GSTP1/NOD2/C1QTNF3/LILRB4/MIF/IL18/MAP2K5/SOCS5/CLEC7A/HMGB1/IL1B/OAS1/MAVS/IL17RA/IL10/HIF1A/TLR7/KLF4/TLR4/F2RL1/OAS3/CSF1R/HAVCR2/SYK/APP/MCOLN2/TLR2/LGALS9/AZU1/IL1RL1/EGR1	42
BP	GO:0080171	lytic vacuole organization	42/5019	98/18903	0.000339582156854349	0.00346297976224355	0.00252783897169845	ATP6V0C/CHMP7/AKTIP/GNPTAB/CHMP2A/TFEB/CHMP1A/CHMP4B/LRRK2/TMEM175/ATP6V0B/GRN/RAB20/HOOK1/PIKFYVE/CHMP6/TPP1/CHMP3/TCIRG1/ZKSCAN3/RNASEK/ATP6V0A1/ACP2/MBTPS1/PPT1/VPS18/CHMP2B/ABCA1/LAPTM5/GAA/RAB7A/SCARB2/ATP6V1D/HPS4/CHMP1B/CORO1A/HEXA/ARL8B/LAPTM4B/P2RX7/ATP6AP2/HEXB	42
BP	GO:0032753	positive regulation of interleukin-4 production	16/5019	27/18903	0.000340984606608202	0.00347174454562555	0.00253423691870729	CD28/GATA3/CD40LG/CD3E/RARA/IRF4/SASH3/FCER1G/HLA-E/NLRP3/IL1RAP/HAVCR2/CD86/SYK/LGALS9/EPX	16
BP	GO:2001243	negative regulation of intrinsic apoptotic signaling pathway	43/5019	101/18903	0.000345380823812762	0.00350426656986237	0.00255797671678543	GRINA/KDM1A/PPIA/XBP1/TAF9/MAPK7/URI1/MMP9/ARMC10/SNAI1/TRIAP1/HSPA1A/VDAC2/CREB3/NDUFS3/ZNF385A/SOD2/LRRK2/MIF/CLU/HERPUD1/PPIF/PINK1/AKT1/PTPN1/PLAUR/OPA1/RRN3/ENO1/TAF9B/HSPB1/TMBIM6/FIGNL1/BID/IVNS1ABP/HIF1A/HELLS/ATAD5/PTGS2/BCL2L1/MCL1/MDM2/HYOU1	43
BP	GO:0071479	cellular response to ionizing radiation	34/5019	75/18903	0.000347898374383133	0.00350426656986237	0.00255797671678543	RPL26/GATA3/KDM1A/DNM2/NUCKS1/BLM/RAD1/INTS7/GRB2/WRN/TP53BP1/RAD9A/XRCC6/ATR/MAPK14/NET1/XRCC5/BRCA2/RHOB/FIGNL1/TANK/BRCA1/BRCC3/CCND2/ATM/GADD45A/BCL2L1/CDKN1A/CYBA/TP53/MDM2/RAD51AP1/EGR1/HSPA5	34
BP	GO:0042255	ribosome assembly	29/5019	61/18903	0.000347988261167408	0.00350426656986237	0.00255797671678543	C1QBP/NPM1/RPLP0/RPS19/BRIX1/RPL11/RPL24/FASTKD2/RPL6/PRKDC/RPSA/RPS5/MRTO4/EIF2A/MRPL22/RPF2/RPL38/MRPS11/ERAL1/MDN1/MRPS7/DHX37/XRCC5/NLE1/RPS14/NIP7/RRS1/SBDS/RPS28	29
BP	GO:0009303	rRNA transcription	20/5019	37/18903	0.000349044863980233	0.00350426656986237	0.00255797671678543	DEDD/SPIN1/SIRT7/GTF3C3/NCL/NOL11/PWP1/GTF3C4/GTF3A/SMARCA4/GTF3C6/POLR1B/POLR1E/GTF3C5/ANG/NPM3/SMARCB1/TAF1B/DDX11/TP53	20
BP	GO:0034341	response to interferon-gamma	56/5019	140/18903	0.000349583234446492	0.00350426656986237	0.00255797671678543	XCL2/CD40/IFNG/SLC11A1/CXCL16/SYNCRIP/XCL1/NR1H2/WAS/TNF/MEFV/SLC26A6/NLRC5/IRF1/ZYX/SIRPA/EDN1/IFITM2/IFITM1/STXBP4/CCL20/FASLG/HCK/IFNGR2/IFITM3/RAB20/CCL4/GCH1/ARG1/TRIM21/CCL5/PARP9/GBP1/CCL4L1/CASP1/SP100/GBP2/GBP5/JAK1/CCL3/TLR4/IRGM/IL12RB1/ACTR3/IFNGR1/CCL3L3/TXK/CD47/TLR2/ASS1/LGALS9/TP53/IRF8/CCL23/CALCOCO2/CCL1	56
BP	GO:0001780	neutrophil homeostasis	13/5019	20/18903	0.000349953299071539	0.00350426656986237	0.00255797671678543	IL6/CXCR2/PIK3CD/MTHFD1/GCNT4/XKR8/HCAR2/ITPKB/HMGB1/SH2B3/JAM3/PDE4B/CSF1	13
BP	GO:0002577	regulation of antigen processing and presentation	13/5019	20/18903	0.000349953299071539	0.00350426656986237	0.00255797671678543	CCR7/HLA-DOB/SLC11A1/HFE/WAS/LILRB2/NOD2/FCGR2B/NOD1/CD68/FGL2/THBS1/TAPBPL	13
BP	GO:0002888	positive regulation of myeloid leukocyte mediated immunity	13/5019	20/18903	0.000349953299071539	0.00350426656986237	0.00255797671678543	CD177/DDX1/ITGB2/SPI1/ITGAM/ARG1/TYROBP/HLA-E/MAVS/PTAFR/F2RL1/FCGR1A/STAP1	13
BP	GO:1902004	positive regulation of amyloid-beta formation	13/5019	20/18903	0.000349953299071539	0.00350426656986237	0.00255797671678543	IFNG/EPHA4/GSK3A/TNF/CLU/GSAP/RELA/PICALM/ROCK2/CSNK1E/CASP3/ABCG1/IFNGR1	13
BP	GO:1903978	regulation of microglial cell activation	13/5019	20/18903	0.000349953299071539	0.00350426656986237	0.00255797671678543	IL6/NR1D1/LDLR/LRRK2/MIR128-1/MMP8/GRN/MIR142/PTPRC/CCL3/ATM/CST7/STAP1	13
BP	GO:0032637	interleukin-8 production	44/5019	104/18903	0.000350207434804825	0.00350426656986237	0.00255797671678543	MYD88/FFAR2/C5AR2/IL6/CD2/TNF/BCL3/PRKD2/TLR5/TLR1/TMSB4X/HSPA1A/TLR8/NOD2/LILRA2/HSPA1B/FCN1/CHI3L1/CD14/BCL10/MAP2K5/CLEC7A/ARRB1/RELA/HMGB1/IL1B/MAVS/NOD1/PTPRC/IL10/STAT3/TLR6/TLR7/KLF4/DDIT3/TLR4/BPI/F2RL1/RAB1A/SYK/TLR2/CD244/LGALS9/PTPN22	44
BP	GO:0010165	response to X-ray	18/5019	32/18903	0.000358319679454014	0.00357425277758029	0.00260906389473536	GATA3/THBD/DNM2/NUCKS1/MSH2/BLM/ERCC1/ERCC8/TP53BP1/XRCC6/XRCC5/BRCA2/XRCC2/CASP3/BRCC3/CCND2/ATM/TP53	18
BP	GO:0051085	chaperone cofactor-dependent protein refolding	18/5019	32/18903	0.000358319679454014	0.00357425277758029	0.00260906389473536	HSPA6/ST13/DNAJB1/HSPA1L/HSPA7/TOR2A/HSPA2/HSPA1A/HSPA1B/PTGES3/TOR1B/SDF2/DNAJB12/HSPA13/HSPE1/TOR1A/HSPH1/HSPA5	18
BP	GO:0030218	erythrocyte differentiation	52/5019	128/18903	0.000359517669785162	0.00358061679222169	0.00261370937502444	MYB/ZFP36L1/CDK6/GATA3/RPS19/KIT/RPS6/PRKDC/TGFBR3/PRMT1/ETS1/JMJD6/UBA5/ID2/SLC25A5/G6PD/SPI1/HSPA1A/HCLS1/HSPA1B/SMAD5/ZFP36/STAT5B/ACVR2A/TMEM14C/BCL6/LYN/MAFB/MAPK14/FOXO3/IKZF1/KLF2/GATA2/JAK3/CDK5RAP3/ALAS1/RPS14/STAT3/CASP3/HIF1A/VEGFA/KCNQ1/SH2B3/ACVR1B/UFL1/HOXA5/SLC25A40/L3MBTL3/BPGM/SLC25A38/EPB42/INHBA	52
BP	GO:0071901	negative regulation of protein serine/threonine kinase activity	50/5019	122/18903	0.000361392869164546	0.00359369518730654	0.00262325608885258	IPO7/DUSP16/IPO5/INPP5K/SMPD1/HEG1/ZNF675/GSTP1/RGS14/ABL1/PRKCD/TFAP4/DUSP1/RGS2/LRP5/SLC8A1/AKT1/PTPN1/LYN/PAQR3/PTPRJ/IL1B/CDKN1B/SPRY2/HEXIM1/PRKAR1A/LATS2/STK38/TNFAIP3/KAT2B/CDK5RAP3/HHEX/CASP3/CD300A/SPRY3/MIR20A/SH2B3/GADD45A/CDKN1A/PTEN/CEBPA/NF1/PDCD4/CHORDC1/DUSP10/SORL1/PTPN6/PTPN22/CAV1/PRKAR2B	50
BP	GO:0002204	somatic recombination of immunoglobulin genes involved in immune response	26/5019	53/18903	0.000375101120430238	0.00370694986712664	0.00270592754899158	CD28/CD40/CD40LG/SLC15A4/MSH2/THOC1/MSH6/TBX21/UNG/ERCC1/TP53BP1/BCL6/RIF1/MLH1/EXOSC6/BATF/CCR6/APLF/PTPRC/IL10/ATAD5/STAT6/TGFB1/TFRC/IL27RA/TNFSF13	26
BP	GO:0002208	somatic diversification of immunoglobulins involved in immune response	26/5019	53/18903	0.000375101120430238	0.00370694986712664	0.00270592754899158	CD28/CD40/CD40LG/SLC15A4/MSH2/THOC1/MSH6/TBX21/UNG/ERCC1/TP53BP1/BCL6/RIF1/MLH1/EXOSC6/BATF/CCR6/APLF/PTPRC/IL10/ATAD5/STAT6/TGFB1/TFRC/IL27RA/TNFSF13	26
BP	GO:0032210	regulation of telomere maintenance via telomerase	26/5019	53/18903	0.000375101120430238	0.00370694986712664	0.00270592754899158	CCT2/CCT6A/CCT4/CCT8/HNRNPA1/CCT7/CCT3/MAPKAPK5/DKC1/NAT10/POT1/MAPK3/PARN/CTC1/TINF2/HNRNPC/CCT5/NAF1/ATR/TERF2/EXOSC10/MAPK1/XRCC5/TERF1/TNKS/ATM	26
BP	GO:0045190	isotype switching	26/5019	53/18903	0.000375101120430238	0.00370694986712664	0.00270592754899158	CD28/CD40/CD40LG/SLC15A4/MSH2/THOC1/MSH6/TBX21/UNG/ERCC1/TP53BP1/BCL6/RIF1/MLH1/EXOSC6/BATF/CCR6/APLF/PTPRC/IL10/ATAD5/STAT6/TGFB1/TFRC/IL27RA/TNFSF13	26
BP	GO:0030890	positive regulation of B cell proliferation	23/5019	45/18903	0.000380409777144726	0.00375361128867805	0.00273998855077926	FCRL3/TNFRSF13C/CD40/BMI1/CARD11/SASH3/SLC39A10/BCL6/MIF/CD38/ADA/BST1/PTPRC/ATAD5/TLR4/PELI1/CDKN1A/TFRC/GPR183/TNFSF13B/IRS2/VAV3/NFATC2	23
BP	GO:0007034	vacuolar transport	63/5019	162/18903	0.000388133073183014	0.00382391813548874	0.00279130978265102	USE1/CHMP7/VPS36/AKTIP/GNPTAB/ATP6V0D1/RNF157/VPS37C/PLEKHM1/AP3S2/CHMP2A/TGFBRAP1/UBAP1/NPC1/CHMP1A/HSPA1A/VPS37A/CHMP4B/VCP/LRRK2/CLU/PINK1/GRN/HOOK1/IGF2R/CHMP6/AP3M1/CHMP3/GGA3/ALS2/LRP1/MON1B/AP1G1/PSAP/C9orf72/VPS52/SORT1/VPS39/RHOB/VPS13C/VPS18/TMEM50A/CHMP2B/SNX27/VPS41/ANKFY1/DENND3/VTA1/LAPTM5/RAB7A/SCARB2/CHMP1B/ATG14/MGRN1/ARL8B/ZFYVE16/UEVLD/NEDD4/NCOA4/KIF13A/VPS13A/SORL1/STAM	63
BP	GO:0019081	viral translation	12/5019	18/18903	0.000423203467364485	0.00414389428840508	0.00302487978446703	EIF2AK4/EIF3D/EIF3B/EIF2D/EIF3L/SSB/DENR/DHX9/CSDE1/EIF3A/EIF3F/EIF3G	12
BP	GO:0072567	chemokine (C-X-C motif) ligand 2 production	12/5019	18/18903	0.000423203467364485	0.00414389428840508	0.00302487978446703	MYD88/TNF/MBP/MIF/MAP2K5/HMGB1/OAS1/KLF4/TLR4/F2RL1/OAS3/MCOLN2	12
BP	GO:1902570	protein localization to nucleolus	12/5019	18/18903	0.000423203467364485	0.00414389428840508	0.00302487978446703	NPM1/RAN/NOL8/RPF2/POLR1A/NMD3/WRN/NVL/BYSL/RRS1/CACNB4/GLUL	12
BP	GO:2000341	regulation of chemokine (C-X-C motif) ligand 2 production	12/5019	18/18903	0.000423203467364485	0.00414389428840508	0.00302487978446703	MYD88/TNF/MBP/MIF/MAP2K5/HMGB1/OAS1/KLF4/TLR4/F2RL1/OAS3/MCOLN2	12
BP	GO:0000422	autophagy of mitochondrion	40/5019	93/18903	0.000425477242017443	0.00415343738238096	0.00303184586758593	MFN2/WDR45/GSK3A/WIPI1/ATG9A/SLC25A5/HUWE1/CSNK2A2/VDAC1/DNM1L/GABARAP/MAP1LC3B/PINK1/GABARAPL1/TSPO/MAP1LC3B2/ATG2A/PHB2/SLC25A46/CTTN/ULK1/CISD2/FUNDC1/FBXW7/HAX1/GABARAPL2/OGT/VPS13C/LRBA/BNIP3/HIF1A/OPTN/ATG7/CAMKK2/ATG14/ATG3/HK2/TP53/BNIP3L/ULK2	40
BP	GO:0061726	mitochondrion disassembly	40/5019	93/18903	0.000425477242017443	0.00415343738238096	0.00303184586758593	MFN2/WDR45/GSK3A/WIPI1/ATG9A/SLC25A5/HUWE1/CSNK2A2/VDAC1/DNM1L/GABARAP/MAP1LC3B/PINK1/GABARAPL1/TSPO/MAP1LC3B2/ATG2A/PHB2/SLC25A46/CTTN/ULK1/CISD2/FUNDC1/FBXW7/HAX1/GABARAPL2/OGT/VPS13C/LRBA/BNIP3/HIF1A/OPTN/ATG7/CAMKK2/ATG14/ATG3/HK2/TP53/BNIP3L/ULK2	40
BP	GO:0016445	somatic diversification of immunoglobulins	32/5019	70/18903	0.000427277847718218	0.00416465633888764	0.00304003526441364	CD28/CD40/CD40LG/SLC15A4/PRKDC/MSH2/THOC1/MSH6/TBX21/UNG/ERCC1/TP53BP1/BCL6/RIF1/MLH1/EXOSC6/BATF/PMS2P1/TCF3/PMS2/PMS2P5/CCR6/APLF/PTPRC/IL10/ATAD5/STAT6/TGFB1/TFRC/IL27RA/SAMHD1/TNFSF13	32
BP	GO:0007032	endosome organization	41/5019	96/18903	0.000433396713980596	0.00419560880873505	0.00306262934954335	ATP6V0C/PI4K2A/CHMP7/VPS36/AKTIP/VPS37C/TMEM127/CHMP2A/TOM1/UBAP1/CHMP1A/VPS37A/CHMP4B/FASLG/SYNJ1/ATP6V0B/TMCC1/HOOK1/CHMP6/CHMP3/ALS2/RNASEK/DNM1/ATP6V0A1/STX6/SNX10/VPS18/CHMP2B/VTA1/SNX33/RAB7A/SCARB2/ATP6V1D/CHMP1B/EXOC8/CORO1C/CLCN3/LAPTM4B/ATP6AP2/EEA1/STAM	41
BP	GO:0000466	maturation of 5.8S rRNA from tricistronic rRNA transcript (SSU-rRNA, 5.8S rRNA, LSU-rRNA)	15/5019	25/18903	0.00043439052727285	0.00419560880873505	0.00306262934954335	WDR12/RPS21/EXOSC2/NOP14/RPP40/EXOSC8/ERI2/UTP20/URB1/KRI1/EXOSC10/NOL9/RCL1/EXOSC9/RRS1	15
BP	GO:0034114	regulation of heterotypic cell-cell adhesion	15/5019	25/18903	0.00043439052727285	0.00419560880873505	0.00306262934954335	LCK/IL1RN/MAPK7/TNF/SKAP1/MBP/FLOT1/MAP2K5/IL1B/IL10/CEACAM6/GCNT2/KLF4/WNK1/MYADM	15
BP	GO:0046039	GTP metabolic process	15/5019	25/18903	0.00043439052727285	0.00419560880873505	0.00306262934954335	GTPBP1/RAN/NME2/IMPDH2/NME7/NME1/AK3/GIMAP7/IMPDH1/LRRK2/AK4/OPA1/NME4/RHOQ/GNAI3	15
BP	GO:0060148	positive regulation of post-transcriptional gene silencing	15/5019	25/18903	0.00043439052727285	0.00419560880873505	0.00306262934954335	IL6/FXR1/XPO5/TIAL1/ZFP36/DHX9/PUM2/MAP2K1/TRUB1/LIMD1/MYCN/STAT3/TRIM71/TGFB1/TP53	15
BP	GO:1900370	positive regulation of post-transcriptional gene silencing by RNA	15/5019	25/18903	0.00043439052727285	0.00419560880873505	0.00306262934954335	IL6/FXR1/XPO5/TIAL1/ZFP36/DHX9/PUM2/MAP2K1/TRUB1/LIMD1/MYCN/STAT3/TRIM71/TGFB1/TP53	15
BP	GO:0010952	positive regulation of peptidase activity	73/5019	194/18903	0.000447952979735414	0.00432007745464289	0.0031534865637006	LCK/EPHA4/PSMD14/RPS3/TNF/PDCD2/MEFV/NLRC4/NLRP12/NLRP1/MBP/FAM162A/BCL2L11/PDCD5/AIFM1/FASLG/CR1/VCP/BCL10/TFAP4/RCN3/AKIRIN2/CLPX/REST/PINK1/GRN/CLEC7A/EIF2AK3/CTSH/CFLAR/LYN/FYN/CASP2/CYFIP2/HMGB1/GRAMD4/PICALM/TNFSF10/ANP32B/S100A8/CASP1/CTSD/NOD1/AIM2/MYC/NLRP3/CIDEB/ASPH/S100A9/ROCK2/STAT3/TANK/ST20/BID/LGMN/LAPTM5/NCSTN/HSPE1/FAS/DLC1/MALT1/PRELID1/SMAD3/PCOLCE2/SYK/P2RX1/APP/PSME2/WDR48/L…	73
BP	GO:0090398	cellular senescence	45/5019	108/18903	0.000452647312195785	0.00434277049620627	0.00317005159115924	NPM1/CDK6/KIR2DL4/CALR/MAPKAPK5/RSL1D1/ABI3/PNPT1/MAP2K3/ID2/MAP3K3/YPEL3/YBX1/SPI1/MAP2K6/ULK3/WRN/ABL1/PRKCD/BCL6/MIF/EEF1E1/ZKSCAN3/MAPK8/TERF2/MAPK14/SMC5/OPA1/CDKN1B/PLK2/MAP2K1/BRCA2/ZNF277/AKT3/NEK6/ATM/CDKN1A/PTEN/LMNA/MIR10A/TP53/ZMIZ1/RBL1/IGF1R/MAP3K5	45
BP	GO:0002446	neutrophil mediated immunity	19/5019	35/18903	0.000455107469569756	0.00434277049620627	0.00317005159115924	CD177/MYD88/IL6/WDR1/STXBP2/ITGB2/SPI1/ITGAM/ANXA3/ARG1/TREM1/BCR/PTAFR/JAGN1/IRAK4/F2RL1/SYK/PRAM1/AZU1	19
BP	GO:0002719	negative regulation of cytokine production involved in immune response	19/5019	35/18903	0.000455107469569756	0.00434277049620627	0.00317005159115924	XCL1/HFE/SLAMF1/LILRB1/TNF/HMOX1/TBX21/SMAD7/NOD2/LILRB4/RABGEF1/BCL6/ARG1/ANGPT1/HLA-F/JAK3/IL10/TGFB1/EPX	19
BP	GO:0032633	interleukin-4 production	19/5019	35/18903	0.000455107469569756	0.00434277049620627	0.00317005159115924	CD28/GATA3/CD40LG/CD3E/RARA/LEF1/IRF4/SASH3/CD83/FCER1G/HLA-E/NLRP3/DDIT3/IL1RAP/HAVCR2/CD86/SYK/LGALS9/EPX	19
BP	GO:0032673	regulation of interleukin-4 production	19/5019	35/18903	0.000455107469569756	0.00434277049620627	0.00317005159115924	CD28/GATA3/CD40LG/CD3E/RARA/LEF1/IRF4/SASH3/CD83/FCER1G/HLA-E/NLRP3/DDIT3/IL1RAP/HAVCR2/CD86/SYK/LGALS9/EPX	19
BP	GO:0043372	positive regulation of CD4-positive, alpha-beta T cell differentiation	19/5019	35/18903	0.000455107469569756	0.00434277049620627	0.00317005159115924	MYB/IL4R/IL23A/NFKBID/IFNG/RARA/SASH3/IL18/CD83/SOCS5/ZBTB7B/NFKBIZ/NLRP3/IL2RG/MALT1/IL12RB1/CD86/HLX/LGALS9	19
BP	GO:0035967	cellular response to topologically incorrect protein	49/5019	120/18903	0.000455192918297939	0.00434277049620627	0.00317005159115924	HSPA6/BAG3/HSPA1L/HSPA7/XBP1/PPP1R15A/TM7SF3/HSPA2/RHBDD2/MBTPS2/ERMP1/RNF185/BCL2L11/ERN1/HSPA1A/CREB3/HSPA1B/TMTC4/EIF2S1/CREB3L4/VCP/HERPUD1/AKIRIN2/ERLEC1/ATXN3/EIF2AK3/DNAJC10/ABCA7/PTPN1/RNF5/TMED2/NCK2/AUP1/DNAJB12/DERL1/MBTPS1/PPP1R15B/NGLY1/TMBIM6/HSPA13/CDK5RAP3/OPTN/YOD1/DDIT3/CREBZF/TOR1A/PIK3R1/UFL1/HSPA5	49
BP	GO:1903707	negative regulation of hemopoiesis	47/5019	114/18903	0.000455739600086707	0.00434277049620627	0.00317005159115924	IL4R/CDK6/GPR137B/LILRB3/RARA/LILRB1/ZC3H12A/TBX21/SMAD7/ID2/IRF1/CEACAM1/ZNF675/LILRB4/CR1/CTLA4/RUNX3/BCL6/PGLYRP1/ZC3H8/SOCS5/CBFB/TMEM176B/LYN/LTF/FCGR2B/MAFB/ZBTB7B/HMGB1/TMEM176A/TNFAIP6/FBXW7/MYC/GATA2/JAK3/TRIB1/RC3H1/CCL3/TLR4/PIK3R1/HOXA7/FGL2/CEBPA/HMGB3/HLX/NF1/INHBA	47
BP	GO:0044088	regulation of vacuole organization	25/5019	51/18903	0.00049034451604804	0.00466556969584995	0.00340568230601035	WDR45/PIP4K2C/SNX18/WIPI1/MTMR3/CHMP4B/PIP4K2B/LRRK2/PINK1/GRN/SMCR8/PIKFYVE/ATG2A/RNF5/RALB/ULK1/SNX4/C9orf72/IFT88/RAB1B/PIP4K2A/SCARB2/UBQLN2/LAPTM4B/TBC1D12	25
BP	GO:0009130	pyrimidine nucleoside monophosphate biosynthetic process	11/5019	16/18903	0.000501669272454817	0.00474507888768654	0.00346372088767465	UPP1/UCK2/CDA/UMPS/DCTD/DHODH/DUT/CMPK1/TYMS/CAD/DCK	11
BP	GO:0042159	lipoprotein catabolic process	11/5019	16/18903	0.000501669272454817	0.00474507888768654	0.00346372088767465	ABHD17B/ABHD10/LDLR/ABHD17A/LYPLA1/LYPLAL1/CTSD/PPT1/LYPLA2/ATM/ABHD17C	11
BP	GO:0050862	positive regulation of T cell receptor signaling pathway	11/5019	16/18903	0.000501669272454817	0.00474507888768654	0.00346372088767465	CCR7/LCK/RPS3/CARD11/PRKD2/CD226/BCL10/RELA/ADA/KCNN4/TRAT1	11
BP	GO:0070431	nucleotide-binding oligomerization domain containing 2 signaling pathway	11/5019	16/18903	0.000501669272454817	0.00474507888768654	0.00346372088767465	SLC15A4/SLC15A3/HSPA1A/NOD2/HSPA1B/RELA/NFKBIA/TNFAIP3/TLR4/IRGM/PTPN22	11
BP	GO:0048708	astrocyte differentiation	36/5019	82/18903	0.000505629645833788	0.00477547408487628	0.00348590818569076	ADORA2A/CDK6/IFNG/EOMES/EPHA4/IL6/HES1/PTPN11/TNF/MAPK3/NR1D1/ID2/C5AR1/ABL1/LDLR/GRN/MIR181B1/LRP1/MAPK1/IL1B/MIR142/IL6ST/MAP2K1/PRPF19/S100A8/S100A9/TTC21B/STAT3/TLR4/KDM4A/PSEN1/IFNGR1/TSPAN2/APP/NF1/LAMB2	36
BP	GO:0071897	DNA biosynthetic process	74/5019	198/18903	0.000518050694457257	0.00488556952855413	0.00356627352774954	CCT2/CCT6A/CCT4/CCT8/HNRNPA1/CYP1B1/CCT7/CCT3/MAPKAPK5/NHP2/DKC1/NAT10/TNF/POT1/RFC3/MAPK3/PARN/PRKD2/POLA1/WRNIP1/POLG2/CTC1/MEAF6/POLE3/REV1/REV3L/WRN/TINF2/VCP/HSP90AB1/LIG3/POLD2/HNRNPC/NVL/POLD4/RAD50/ARRB2/USP10/CCT5/POLI/HNRNPD/PTK2B/PTGES3/NAF1/DSCC1/ATR/TYMS/CHEK1/GINS2/TERF2/EXOSC10/RFC4/GINS1/MAPK1/DNAJC2/RFC5/XRCC5/MYC/TERF1/TNKS/NOP10/KLF4/PCNA/POLE2/ATM/CDKN1A/RPA1/DTL/HGF/RRM1/BMPR…	74
BP	GO:0009612	response to mechanical stimulus	78/5019	211/18903	0.00054617085355786	0.00514317590228123	0.00375431604476482	TNFSF14/BAG3/MYD88/CD40/SLC9A1/KIT/CNN2/MAP3K14/PKD2/TMEM120A/CASP5/KCNJ2/TNF/MAPK3/PSPH/RETN/IRF1/TLR5/TGFBR2/EDN1/PIEZO1/TLR8/ITGB3/CHI3L1/BCL10/BTG2/SLC8A1/MAP3K2/PTK2B/PKD1/RELA/RAF1/MBD2/BACE1/FYN/CASP2/MAPK8/TXNIP/CHEK1/MAPK14/CLCN6/IL1B/STRBP/CASP1/NFKBIA/JUP/CXCR4/TNFRSF10A/TNFRSF10B/NFKB1/TTN/SHANK3/BNIP3/KCNQ1/TLR7/PTGS2/TLR4/TNFRSF1A/FAS/FOS/JUN/GCLC/MMP2/GADD45A/SLC38A2/PTCH1/THBS1/IG…	78
BP	GO:0009220	pyrimidine ribonucleotide biosynthetic process	14/5019	23/18903	0.00055112919515296	0.0051711769190907	0.003774755685305	UPP1/UCK2/NME2/CTPS2/CDA/UMPS/NME7/NME1/CTPS1/DHODH/CMPK1/CAD/DCK/NME4	14
BP	GO:0030168	platelet activation	53/5019	133/18903	0.000551363293521007	0.0051711769190907	0.003774755685305	BLK/LCK/CD40/CD40LG/TEC/THBD/METAP1/IL6/ABAT/VAV1/PPIA/DGKA/TREML1/CEACAM1/PF4/FERMT3/PF4V1/ILK/ITGB3/BLOC1S3/PRKCD/GP5/MYH9/GP6/GP1BA/LYN/FCER1G/MAPK14/PLSCR1/SELP/IL6ST/MYL9/HSPB1/PLCG2/TLN1/RAP2B/P2RY12/TLR4/PLEK/PRKCA/MYL12A/SH2B3/GNAQ/SYK/P2RX1/TXK/PIK3CG/P2RY1/ALOX12/VCL/PTPN6/CD9/VAV3	53
BP	GO:1901990	regulation of mitotic cell cycle phase transition	122/5019	354/18903	0.000551884198699162	0.0051711769190907	0.003774755685305	ZFP36L1/RPL26/CDK4/TRIM39/APEX1/RNASEH2B/RAD17/APPL1/NAE1/KLHL18/PKD2/SMARCC1/ANAPC5/PRKDC/MECP2/FOXO4/CPSF3/BLM/CCNG1/CDC23/HSPA2/CENPJ/PLK3/BTN2A2/GPR132/ID2/ANAPC7/ACTL6A/SMARCA4/TRIAP1/CTC1/CDC16/RCC2/PHF10/ZWILCH/SMARCE1/CCND3/ANKRD17/LSM11/ZW10/TFAP4/DUSP1/PLCB1/MTBP/PBRM1/RAD50/WEE1/KNTC1/AKT1/PKD1/SMARCA2/AVEN/SMARCD3/MIR29A/CASP2/BRD7/CDC25B/ARID1B/PHB2/CDK2AP2/SMARCB1/CDC14B/CHEK1/SPDL1…	122
BP	GO:0033260	nuclear DNA replication	20/5019	38/18903	0.000553996901716786	0.0051711769190907	0.003774755685305	BLM/POLA1/UPF1/WRN/MCM3/BCL6/MCM4/MCM6/TERF2/GINS1/BRCA2/TERF1/TIPIN/ATAD5/GMNN/CDC7/FEN1/CDC45/MCM2/PCNA	20
BP	GO:0043368	positive T cell selection	20/5019	38/18903	0.000553996901716786	0.0051711769190907	0.003774755685305	IL23A/BCL11B/CD3E/IL6/THEMIS/LY9/CD3G/IRF4/TBX21/ZAP70/SPN/SLAMF6/ITPKB/BATF/CD3D/PTPRC/STAT3/STAT6/IL12RB1/TOX	20
BP	GO:0045191	regulation of isotype switching	20/5019	38/18903	0.000553996901716786	0.0051711769190907	0.003774755685305	CD28/CD40/SLC15A4/MSH2/THOC1/TBX21/TP53BP1/BCL6/RIF1/MLH1/EXOSC6/APLF/PTPRC/IL10/ATAD5/STAT6/TGFB1/TFRC/IL27RA/TNFSF13	20
BP	GO:1901800	positive regulation of proteasomal protein catabolic process	48/5019	118/18903	0.000572858080061717	0.00533943813981723	0.00389757975601297	DNAJB2/ZFAND2A/AXIN2/SUMO2/GSK3A/KEAP1/SMAD7/PLK3/FBXO22/RNF185/HECTD1/RNF19B/HSPA1A/HSPA1B/VCP/CSNK1D/LRRK2/CLU/HERPUD1/GABARAP/ATXN3/RNF144B/PSMC3/PIAS1/SOCS5/AKT1/USP13/FBXW7/PSMC2/SOCS4/TMTC3/DET1/CSNK1E/TRIB1/PSMC6/DDA1/RNF144A/SH3RF1/PSEN1/GCLC/UBQLN2/FBXW8/TRIB2/CBFA2T3/CEBPA/RNFT1/MDM2/CAV1	48
BP	GO:0043301	negative regulation of leukocyte degranulation	10/5019	14/18903	0.000577515800339855	0.00535164641648266	0.00390649131763069	HMOX1/CEACAM1/SPI1/RABGEF1/FCGR2B/HLA-F/BCR/CCR2/CD300A/LGALS9	10
BP	GO:0046049	UMP metabolic process	10/5019	14/18903	0.000577515800339855	0.00535164641648266	0.00390649131763069	UPP1/UCK2/CDA/UMPS/DHODH/UPB1/CMPK1/NT5C/CAD/DPYD	10
BP	GO:1904814	regulation of protein localization to chromosome, telomeric region	10/5019	14/18903	0.000577515800339855	0.00535164641648266	0.00390649131763069	CCT2/GNL3/CCT6A/CCT4/CCT8/CCT7/CCT3/DKC1/CCT5/TERF1	10
BP	GO:1905522	negative regulation of macrophage migration	10/5019	14/18903	0.000577515800339855	0.00535164641648266	0.00390649131763069	CYP19A1/CNN2/SLAMF8/C5/MIF/MIR128-1/BCR/CD200/CD200R1/STAP1	10
BP	GO:0002828	regulation of type 2 immune response	18/5019	33/18903	0.000593562081836079	0.00548444501627151	0.0040034290703699	IL4R/GATA3/XCL1/IL6/RARA/TBX21/NOD2/BCL6/IL18/SOCS5/DENND1B/ARG1/NLRP3/CCR2/STAT6/CD86/HLX/IL27RA	18
BP	GO:1905476	negative regulation of protein localization to membrane	18/5019	33/18903	0.000593562081836079	0.00548444501627151	0.0040034290703699	INPP5K/ABI3/TMBIM1/HECTD1/NUMB/GDI1/LZTFL1/GOPC/CSK/KCNE1/LYPLA1/PICALM/GBP1/RHOQ/PPP2R5A/PPFIA1/BCL2L1/TGFB1	18
BP	GO:0050871	positive regulation of B cell activation	60/5019	155/18903	0.000604794379953638	0.00557212574268524	0.00406743255075751	FCRL3/CD28/TNFRSF13C/CD40/IL6/CD27/XBP1/MSH2/BMI1/CARD11/TBX21/SASH3/SLC39A10/NOD2/STAT5B/TP53BP1/BCL6/RIF1/MIF/AKIRIN2/MLH1/EXOSC6/CD38/ADA/IGHM/IGHV2-26/BST1/PCID2/PTPRC/IL10/IGHV4-39/ATAD5/STAT6/IL2RG/TLR4/SH3KBP1/PELI1/TGFB1/CDKN1A/SYK/TFRC/IGLL1/IGHV4-59/GPR183/IGHV4-34/IGHV2-5/IGHV2-70/TNFSF13B/IGHV4-31/IRS2/IGHV4-61/IGHV3-21/IGHV3-7/VAV3/TNFSF13/IGHV3-64/IGHV3-53/IGHV3-11/NFATC2/IGHV3-38	60
BP	GO:2001236	regulation of extrinsic apoptotic signaling pathway	60/5019	155/18903	0.000604794379953638	0.00557212574268524	0.00406743255075751	TRAF1/DEDD2/MAL/IL1A/RBCK1/ITPRIP/MAPK7/FAF1/TNF/TMBIM1/HMOX1/ZMYND11/PF4/ICAM1/GSTP1/HSPA1A/HSPA1B/DEPTOR/FAIM/BCL10/TNFSF12/MAP2K5/G0S2/AKT1/SKIL/RELA/RAF1/TCF7L2/CFLAR/STK4/ITM2C/IL1B/CTTN/TNFSF10/LGALS3/SP100/BIRC6/PEA15/PTPRC/TNFAIP3/BID/TMC8/BRCA1/RFFL/SH3RF1/CYLD/PHIP/GCLC/GCLM/BCL2L1/CTNNA1/PTEN/THBS1/LMNA/NF1/HGF/PDIA3/MCL1/CAV1/INHBA	60
BP	GO:2001020	regulation of response to DNA damage stimulus	109/5019	312/18903	0.000609989871110585	0.00561190681421738	0.00409647116774605	NPM1/PPP4C/RPL26/AXIN2/TADA2B/SIRT7/KDM1A/TADA1/RNASEH2B/SMARCC1/PRKDC/TAF9/IER3/FXR1/KAT2A/THOC1/SETMAR/RPS3/WAS/POT1/SNAI1/UBE2V2/WRNIP1/ACTL6A/TFPT/SMARCA4/USP22/TRIAP1/MEAF6/ERCC1/ETAA1/UCHL5/ABL1/ZNF385A/PHF10/SMARCE1/RUVBL1/ERCC8/PRKCD/PARP1/TP53BP1/MBTD1/RIF1/MIF/DHX9/MORF4L2/SOX4/CLU/RAD9A/PBRM1/NSMCE4A/SKIL/NSMCE1/PARPBP/TTI1/SUPT3H/EEF1E1/SMARCA2/SF3B3/SMARCD3/BRD7/ARID1B/SMARCB1/ATR/HM…	109
BP	GO:0009411	response to UV	58/5019	149/18903	0.000627887306355365	0.00576826355867271	0.00421060543917074	MAPK13/N4BP1/NPM1/RPL26/EIF2AK4/KDM1A/SMPD1/HMGN1/MSH2/ZRANB3/MSH6/MMP9/BCL3/IMPACT/TRIAP1/ERCC1/REV1/WRN/ERCC8/EIF2S1/PRKCD/MAP4K3/CARD16/PARP1/MME/ACTR5/AKT1/RELA/USF1/METTL3/ATR/MAPK8/CHEK1/CREBBP/TIMP1/UBE2B/CAT/MYC/BRCA2/TIPIN/GTF2H2/HYAL3/CASP3/ST20/PTGS2/DDB2/FEN1/PRKAA1/PCNA/RUVBL2/MMP2/DDB1/PIK3R1/CDKN1A/DTL/NEDD4/MFAP4/TP53	58
BP	GO:0000727	double-strand break repair via break-induced replication	9/5019	12/18903	0.000635274388898902	0.0057832284888656	0.00422152924939994	MCM3/MCM4/MCM6/GINS2/MCM7/CDC7/CDC45/MCM2/MCM5	9
BP	GO:0002887	negative regulation of myeloid leukocyte mediated immunity	9/5019	12/18903	0.000635274388898902	0.0057832284888656	0.00422152924939994	HMOX1/SPI1/RABGEF1/FCGR2B/CX3CR1/BCR/CCR2/CD300A/LGALS9	9
BP	GO:0051095	regulation of helicase activity	9/5019	12/18903	0.000635274388898902	0.0057832284888656	0.00422152924939994	MSH2/POT1/MSH6/SSBP1/MNAT1/GTF2H2/IFIT1/MCM2/TP53	9
BP	GO:0070202	regulation of establishment of protein localization to chromosome	9/5019	12/18903	0.000635274388898902	0.0057832284888656	0.00422152924939994	CCT2/CCT6A/CCT4/CCT8/CCT7/CCT3/DKC1/CCT5/TERF1	9
BP	GO:1904816	positive regulation of protein localization to chromosome, telomeric region	9/5019	12/18903	0.000635274388898902	0.0057832284888656	0.00422152924939994	CCT2/GNL3/CCT6A/CCT4/CCT8/CCT7/CCT3/DKC1/CCT5	9
BP	GO:1905666	regulation of protein localization to endosome	9/5019	12/18903	0.000635274388898902	0.0057832284888656	0.00422152924939994	ABHD17B/ANKRD13A/ABHD17A/MSN/ROCK2/EZR/RDX/SORL1/ABHD17C	9
BP	GO:0002753	cytoplasmic pattern recognition receptor signaling pathway	28/5019	60/18903	0.00063675208885852	0.0057832284888656	0.00422152924939994	C1QBP/OASL/SLC15A4/SLC15A3/SLC46A2/MAP2K6/HSPA1A/NOD2/HSPA1B/TIFA/BIRC3/ANKRD17/PUM2/RELA/PHB2/RIOK3/RNF125/NFKBIA/TNFAIP3/SLC15A2/ALPK1/CYLD/TLR4/IRGM/OAS3/IFIH1/USP15/PTPN22	28
BP	GO:0051353	positive regulation of oxidoreductase activity	28/5019	60/18903	0.00063675208885852	0.0057832284888656	0.00422152924939994	IFNG/POR/TNF/EDN1/NOD2/ABL1/FXN/VDR/AKT1/GNAI2/PTK2B/FCER2/GCH1/SCARB1/CALM3/TERF2/IL1B/RIPK3/NOD1/FDX1/NDUFA4/NPR3/PDP1/HIF1A/PDP2/NUS1/GNAI3/CYBA	28
BP	GO:2000404	regulation of T cell migration	24/5019	49/18903	0.000641393337763291	0.00581317773938619	0.00424339102389384	TNFSF14/XCL2/XCL1/TNFRSF14/ADAM8/ITGB3/ABL1/CCL20/SPN/SPNS2/ITGA4/OXSR1/CCR6/CCL5/RIPK3/CCR2/LRCH1/WNK1/CORO1A/APP/DOCK8/IL27RA/CD200/CD200R1	24
BP	GO:0002084	protein depalmitoylation	8/5019	10/18903	0.000647322888714884	0.00581317773938619	0.00424339102389384	ABHD17B/ABHD10/ABHD17A/LYPLA1/LYPLAL1/PPT1/LYPLA2/ABHD17C	8
BP	GO:0002291	T cell activation via T cell receptor contact with antigen bound to MHC molecule on antigen presenting cell	8/5019	10/18903	0.000647322888714884	0.00581317773938619	0.00424339102389384	LILRB1/ICAM1/APBB1IP/ITGAL/LGALS3/HAVCR2/FGL2/LGALS9	8
BP	GO:0032261	purine nucleotide salvage	8/5019	10/18903	0.000647322888714884	0.00581317773938619	0.00424339102389384	APRT/HPRT1/ADSL/AMPD3/AMPD2/ADA/DCK/ADK	8
BP	GO:0060397	growth hormone receptor signaling pathway via JAK-STAT	8/5019	10/18903	0.000647322888714884	0.00581317773938619	0.00424339102389384	STAT5B/PTPN1/LYN/TYK2/JAK3/STAT3/JAK1/STAT6	8
BP	GO:1904851	positive regulation of establishment of protein localization to telomere	8/5019	10/18903	0.000647322888714884	0.00581317773938619	0.00424339102389384	CCT2/CCT6A/CCT4/CCT8/CCT7/CCT3/DKC1/CCT5	8
BP	GO:2000234	positive regulation of rRNA processing	8/5019	10/18903	0.000647322888714884	0.00581317773938619	0.00424339102389384	SIRT7/WDR43/HEATR1/DIMT1/WDR75/UTP15/RIOK1/RIOK2	8
BP	GO:2000659	regulation of interleukin-1-mediated signaling pathway	8/5019	10/18903	0.000647322888714884	0.00581317773938619	0.00424339102389384	ZBP1/IL1RN/IL6/OTUD4/ZNF675/IL1R1/IL1R2/MIR27A	8
BP	GO:0010212	response to ionizing radiation	56/5019	143/18903	0.000649821035750416	0.00582742735285857	0.004253792681062	RPL26/GATA3/KDM1A/THBD/DNM2/IL1A/PRKDC/SMPD1/NUCKS1/MSH2/BLM/MTA1/RAD1/INTS7/GRB2/ERCC1/WRN/ERCC8/SOD2/PARP1/TP53BP1/RAD9A/XRCC6/ATR/MAPK14/NET1/XRCC5/DNMT3A/MYC/BRCA2/RHOB/PTPRC/XRCC2/NABP1/FIGNL1/CASP3/TANK/BRCA1/BRCC3/CCND2/DCLRE1C/PRKAA1/ATM/GADD45A/BCL2L1/CDKN1A/CBL/ALAD/TOPBP1/CYBA/TP53/TICRR/MDM2/RAD51AP1/EGR1/HSPA5	56
BP	GO:0006458	'de novo' protein folding	21/5019	41/18903	0.000652342389165619	0.00584184486880247	0.00426431690042806	HSPA6/ST13/CCT2/DNAJB1/HSPA1L/HSPA7/TOR2A/HSPA2/HSPA1A/HSPA1B/PTGES3/TOR1B/DNAJC2/SDF2/FKBP1A/DNAJB12/HSPA13/HSPE1/TOR1A/HSPH1/HSPA5	21
BP	GO:1903313	positive regulation of mRNA metabolic process	55/5019	140/18903	0.000660215121191123	0.00590407760125321	0.00430974434650194	ZFP36L1/PAIP1/CLNS1A/GTPBP1/NCL/SYNCRIP/POLR2D/EXOSC2/ZC3H12A/PATL1/DIS3/TTC5/NCBP2/PNPT1/PARN/EXOSC8/NCBP1/NUDT21/PATL2/YTHDF2/TNRC6C/CNOT7/ZC3H12D/YBX1/KHSRP/UPF1/PRMT5/PAF1/TOB1/ZFP36/EXOSC5/SF3B4/DAZAP1/DHX9/BTG2/PAN3/RBMX/HNRNPD/TARDBP/CPEB3/METTL14/MLH1/DCP1B/CNOT2/METTL3/CSDE1/POLR2G/PRPF19/LEO1/ROCK2/PRDX6/EXOSC9/RC3H1/TRIM71/ZFP36L2	55
BP	GO:0006606	protein import into nucleus	63/5019	165/18903	0.000684777101148701	0.00611517428036983	0.00446383661642655	IPO7/BAG3/IPO5/IFNG/RAN/APPL1/ZC3H12A/NUP133/BCL3/NUP107/CSE1L/HCLS1/PRKCD/NUTF2/HSP90AB1/LRRK2/ELAVL1/AKIRIN2/NUP35/NUP54/TARDBP/AKT1/RPAIN/STK4/NUP155/NOLC1/PHB2/TXNIP/MAPK14/ANGPT1/EFCAB7/RANBP6/FAM53C/NUP188/E2F3/UFM1/KPNA5/IPO9/MAVS/TRIM28/NFKBIA/JUP/STAT3/KPNB1/TRAF3IP2/CHP1/PTGS2/NUP88/PSEN1/KPNA2/SMAD3/PIK3R1/TGFB1/CDKN1A/SYK/CBLB/LMNA/NF1/CD36/RANBP17/TP53/RANBP2/FERMT1	63
BP	GO:0051701	biological process involved in interaction with host	75/5019	203/18903	0.000702749772187462	0.0062669205625755	0.00457460543181268	CR2/WWP2/CHMP7/SLAMF1/PPIA/SMPD1/VAMP8/THOC1/RPSA/TNFRSF14/CHMP2A/CD55/ICAM1/GPR15/IFITM2/IFITM1/DPP4/THOC7/NPC1/CHMP1A/HSPA1A/HSPA1B/ITGB3/FCN1/CHMP4B/LDLR/CR1/SELPLG/HSP90AB1/PGLYRP1/TRIM26/IFITM3/PIKFYVE/ANPEP/CHMP6/ZNF639/LTF/SCARB1/CCR5/CHMP3/HMGB1/THOC2/RNASEK/TRIM21/CD4/PLSCR1/SLC7A1/TRIM38/VPS18/TRIM25/SIGLEC1/CXCR4/TRIM8/CHMP2B/PTX3/CTSB/TPCN1/INSR/RAB7A/SCARB2/TRIM6/CHMP1B/IFIT1/MID2/CD…	75
BP	GO:0010639	negative regulation of organelle organization	125/5019	366/18903	0.000708735872194871	0.00631150023233148	0.00460714683669852	NPM1/INPP5K/MPHOSPH9/DNM2/HNRNPA1/CAPZB/KAT2A/SETMAR/WAS/NAT10/POT1/LIMK2/LILRB2/S1PR1/RAD1/PATL2/SLC25A5/HUWE1/TMSB4X/TRIAP1/CTC1/HORMAD1/ERCC1/HSPA1A/MAK/CHMP4B/ZWILCH/PRKCD/TINF2/PARP1/ZW10/DUSP1/LRRK2/FXN/MTBP/CLU/STMN1/HNRNPC/PPIF/RAD50/ARRB2/PINK1/FLII/KNTC1/AKT1/SMCR8/CKAP2/GDI2/TSPO/TBC1D7/OMA1/SSH2/ADD1/SLC35F6/CLASP2/ARAP1/CHEK1/TERF2/EXOSC10/PTTG2/TRIOBP/TMEM67/SPDL1/OPA1/AVIL/LIMA1/OD…	125
BP	GO:0034605	cellular response to heat	30/5019	66/18903	0.000717442351269676	0.00638014797499069	0.00465725698781896	HSPA6/IER5/BAG3/DNAJB1/IL1A/POLR2D/HDAC2/HMOX1/PRKACA/HSP90AB3P/RBBP7/HSPA1A/HSPA1B/EIF2S1/VCP/HSP90AB1/ATXN3/LYN/ATR/DNAJC2/CREBBP/YWHAE/HSBP1/CD34/PTGS2/TFEC/ATM/THBS1/NF1/CHORDC1	30
BP	GO:0001824	blastocyst development	47/5019	116/18903	0.000720305245072511	0.00638783874756399	0.00466287094919558	EOMES/MATR3/MFN2/RPL7L1/JUNB/TTLL1/PALB2/CCNB1IP1/ACTL6A/STMN3/HORMAD1/PHF6/TBL1XR1/NECAB1/TTLL4/NDEL1/SKIL/RPL13/PTPN18/NASP/GABPA/CNOT2/ADA/SMARCB1/NDUFA2/THOC2/BYSL/CHEK1/GINS1/DAD1/SMIM14/LATS2/BRCA2/CTR9/NLE1/PELO/RBBP8/CCDC62/BCOR/KLF4/MED21/SBDS/ST8SIA6/TET1/CAPN2/TM4SF1/RRM2	47
BP	GO:0002832	negative regulation of response to biotic stimulus	47/5019	116/18903	0.000720305245072511	0.00638783874756399	0.00466287094919558	C1QBP/RPS19/KIR2DL4/NR1H2/LILRB1/KLRD1/MICB/ZDHHC18/TRAFD1/SLAMF8/NLRC5/KLRC1/SERPINB9/YTHDF2/CNOT7/CEACAM1/LILRA2/CR1/CARD16/PARP1/ARRB2/GRN/LTF/METTL3/MIR181B1/ARG1/TRIM21/OAS1/HLA-E/HLA-F/RIOK3/RNF125/TRIM38/HLA-A/TNFAIP3/TRIB1/HLA-B/TTLL12/OAS3/USP15/HAVCR2/CLEC12B/STAT2/FGL2/LGALS9/DUSP10/SAMHD1	47
BP	GO:2000060	positive regulation of ubiquitin-dependent protein catabolic process	45/5019	110/18903	0.000725711195758656	0.00642686618515352	0.00469135944305858	DNAJB2/ZFAND2A/AXIN2/SUMO2/GSK3A/KEAP1/SMAD7/PLK3/FBXO22/HECTD1/RNF19B/HSPA1A/HSPA1B/VCP/CSNK1D/LRRK2/CLU/HERPUD1/GABARAP/RNF144B/PIAS1/SOCS5/AKT1/PTK2B/FBXW7/SOCS4/DET1/CSNK1E/TRIB1/DDA1/RNF144A/SH3RF1/LAPTM5/PSEN1/GCLC/UBQLN2/FBXW8/TRIB2/CBFA2T3/PYHIN1/PTEN/CEBPA/AGTPBP1/MDM2/CAV1	45
BP	GO:0048284	organelle fusion	59/5019	153/18903	0.000747065205542101	0.0066068256213502	0.00482272275078063	MFN2/CHMP7/STOML2/SLAMF1/AFG3L2/VAMP8/PLEKHM1/RAB3A/CHCHD3/VAMP2/RAB8B/CHMP2A/HUWE1/TOM1/TGFBRAP1/CHMP1A/CHMP4B/PIP4K2B/THG1L/DYSF/TMEM175/STX3/USO1/RAB20/PIKFYVE/CHMP6/CHMP3/STX11/GRIK5/OMA1/BNIP1/OPA1/VAMP1/STX6/STX10/VPS39/VPS18/PIP4K2A/BNIP3/CHMP2B/VPS41/ANKFY1/ANKRD27/RAB7A/CHMP1B/MTCH2/YIPF4/STX12/CORO1A/GNAI3/TFRC/SNAP23/ARL8B/STX7/VPS8/TBC1D4/EEA1/VAT1/VAV3	59
BP	GO:0043488	regulation of mRNA stability	66/5019	175/18903	0.000761953271871954	0.00672853216734103	0.00491156374067631	NPM1/ZFP36L1/FASTKD1/PAIP1/MYD88/AXIN2/SLC11A1/SYNCRIP/APEX1/POLR2D/SERBP1/FASTKD2/EXOSC2/ZC3H12A/PATL1/FXR1/DIS3/PNPT1/PARN/EXOSC8/IGF2BP2/PATL2/ZC3H14/YTHDF2/TNRC6C/CNOT7/ZC3H12D/YBX1/KHSRP/UPF1/TOB1/ZFP36/EXOSC5/PRKCD/DHX9/BTG2/PAN3/ELAVL1/HNRNPC/HNRNPD/TARDBP/AKT1/RBM38/HNRNPA0/PUM2/CPEB3/METTL14/MLH1/DCP1B/CNOT2/METTL3/CSDE1/MAPK14/POLR2G/PCID2/ROCK2/LARP1/EXOSC9/RNASEL/TRAF3IP2/RC3H1/CARHSP…	66
BP	GO:0045055	regulated exocytosis	87/5019	242/18903	0.000762931783128284	0.00672853216734103	0.00491156374067631	BLK/CD177/ADORA2A/IL4R/KIT/RASGRP1/STXBP2/VAMP8/FGR/RAB3A/VAMP2/HMOX1/PIK3CD/ITGB2/SYNGR2/FCGR3A/CEACAM1/RAC2/PTGDR/SPI1/LAT/KLRC2/SYNJ1/RABGEF1/LRRK2/STX3/DNAJC5/HCK/NAPA/MYH9/RAP1A/REST/ITGAM/APBA2/GNAI2/ANXA3/BACE1/LYN/FCGR2B/FER/STX11/GRIK5/PREPL/CALM3/C12orf4/AP1G1/SNX4/SV2A/HLA-F/RAB31/MICAL1/BCR/GATA2/CCR2/VPS18/PTAFR/NKG7/HYAL3/CD300A/SYNGR1/RAB44/RAB11FIP1/CCL3/PLEK/F2RL1/ABCC4/PSEN1/PRK…	87
BP	GO:1900027	regulation of ruffle assembly	17/5019	31/18903	0.000774333840228952	0.00680610332720322	0.00496818763525329	DEF8/PLEKHM1/ABI3/WDPCP/ICAM1/RCC2/RHOG/EVL/FAM98A/NDEL1/ARHGAP24/PFN1/RDX/P2RY12/CORO1C/STAP1/CAV1	17
BP	GO:2000316	regulation of T-helper 17 type immune response	17/5019	31/18903	0.000774333840228952	0.00680610332720322	0.00496818763525329	IL23A/NFKBID/JUNB/ZC3H12A/CLEC6A/TBX21/SMAD7/CLEC7A/BATF/TYK2/ZBTB7B/NFKBIZ/RC3H1/MALT1/IL12RB1/ARID5A/IL27RA	17
BP	GO:0051651	maintenance of location in cell	82/5019	226/18903	0.000774920741664677	0.00680610332720322	0.00496818763525329	CCR7/LCK/LCN2/SYNE1/SLC30A4/XCL1/IBTK/CALR/PKD2/LETM1/ARL2/TBCCD1/PRKACA/TMSB4X/HSP90B1/ITGB3/ABL1/RASA3/FASLG/ANK3/GP5/NTSR1/PINK1/SLC8A1/AKT1/GP1BA/PTK2B/ITPR3/TSPO/LYN/FTL/CCR5/FTH1/TXN/GRIK5/CD19/PLCG1/CALM3/CD4/CCDC88A/CAMK2D/ITPR1/SUN2/GPSM2/FKBP1A/S100A8/CALM1/SP100/PTPRC/TOPORS/VPS13C/CAPN3/S100A9/HK1/PLCG2/GOLPH3/MCOLN1/ITPR2/TPCN1/CCL3/AKAP9/DDIT3/GAA/PSEN1/CORO1A/HEXA/INSIG1/CXCL9/MCOL…	82
BP	GO:0016570	histone modification	157/5019	474/18903	0.000778959098107309	0.00683218720617028	0.0049872278406004	WBP2/MYB/SET/GATA3/CLNS1A/ZZZ3/TADA2B/EOMES/PAX5/SIRT7/SMARCAD1/KDM1A/TADA1/RBBP4/SAP30BP/ZNF335/UBE2E1/MECP2/HDAC2/TAF9/MSL3/PARP2/KAT2A/SETMAR/PWP1/CRTC2/PRDM5/WDR5/BMI1/PRMT1/JMJD6/LEF1/MTHFR/MTA1/IRF4/SUV39H2/PRKD2/GTF3C4/MBIP/ACTL6A/SMYD3/HUWE1/RBBP7/EHMT1/USP22/MEAF6/SPI1/POLE3/SETDB2/PRMT5/PAF1/KDM6B/TBL1XR1/HDAC8/TADA2A/RUVBL1/HAT1/EZH1/NCOA6/MYBBP1A/MBTD1/LRRK2/PRDM1/SIN3B/BCL6/PHF2/RIF1…	157
BP	GO:0061008	hepaticobiliary system development	56/5019	144/18903	0.000791988140065618	0.00693694817476652	0.00506369922574038	ACADM/IL6/CPT1A/PKD2/RARA/HES1/XBP1/TGFBR3/TNF/HMOX1/PNPT1/LSR/CEACAM1/CSNK2A2/MKS1/PRMT5/UPB1/SOD2/PHF2/HNRNPD/PKD1/RELA/IGF2R/FPGS/CFLAR/ARF6/ADA/SMARCB1/ARG1/RPGRIP1L/TYMS/PTCD2/RPS6KA1/FBXW7/TGFA/UPF2/SRD5A1/TNFAIP3/IL10/CDK5RAP3/UCP2/NOTCH2/ARID5B/NPHP3/JUN/SEC63/SMAD3/PCNA/CEBPA/PTCH1/HLX/NF1/HGF/ACAT1/ASS1/EZH2	56
BP	GO:0001889	liver development	55/5019	141/18903	0.000806316935428076	0.007052791361323	0.00514826019394929	ACADM/IL6/CPT1A/PKD2/RARA/HES1/XBP1/TGFBR3/TNF/HMOX1/PNPT1/LSR/CEACAM1/CSNK2A2/PRMT5/UPB1/SOD2/PHF2/HNRNPD/PKD1/RELA/IGF2R/FPGS/CFLAR/ARF6/ADA/SMARCB1/ARG1/RPGRIP1L/TYMS/PTCD2/RPS6KA1/FBXW7/TGFA/UPF2/SRD5A1/TNFAIP3/IL10/CDK5RAP3/UCP2/NOTCH2/ARID5B/NPHP3/JUN/SEC63/SMAD3/PCNA/CEBPA/PTCH1/HLX/NF1/HGF/ACAT1/ASS1/EZH2	55
BP	GO:0050810	regulation of steroid biosynthetic process	33/5019	75/18903	0.000810830072499071	0.00708257852945227	0.00517000365467484	ADM/IFNG/POR/IL1A/TNF/ERLIN1/NR1D1/MBTPS2/SNAI1/SEC14L2/IGFBP7/REST/DDX20/TSPO/ATP1A1/STAR/MBTPS1/AKR1C3/ERLIN2/CES1/ARMC5/NFKB1/GFI1/PRKAA1/ABCG1/DHCR7/ASAH1/INSIG1/STARD4/LPCAT3/SOD1/IGF1R/EGR1	33
BP	GO:0010824	regulation of centrosome duplication	23/5019	47/18903	0.000839539600494043	0.00732335089435049	0.0053457580075976	XPO1/NPM1/KAT2A/NAT10/CHMP2A/CENPJ/CHMP1A/CEP76/CHMP4B/ALMS1/SPICE1/CHMP3/TMEM67/PLK2/SASS6/ROCK2/KAT2B/CHMP2B/GEN1/BRCA1/PLK4/CHMP1B/CHORDC1	23
BP	GO:0007041	lysosomal transport	51/5019	129/18903	0.00085845028710392	0.00747810781436303	0.00545872447012589	USE1/CHMP7/AKTIP/GNPTAB/RNF157/PLEKHM1/CHMP2A/TGFBRAP1/NPC1/CHMP1A/HSPA1A/CHMP4B/VCP/LRRK2/CLU/PINK1/GRN/HOOK1/IGF2R/CHMP6/AP3M1/CHMP3/GGA3/ALS2/LRP1/AP1G1/PSAP/C9orf72/VPS52/SORT1/VPS39/RHOB/VPS18/CHMP2B/SNX27/VPS41/ANKFY1/DENND3/LAPTM5/RAB7A/SCARB2/CHMP1B/ATG14/MGRN1/ARL8B/ZFYVE16/UEVLD/NEDD4/NCOA4/KIF13A/SORL1	51
BP	GO:0016241	regulation of macroautophagy	61/5019	160/18903	0.000861579126133335	0.00749515228911095	0.0054711662660583	ATP6V0C/BAG3/WDR45/SESN2/PIP4K2C/ATP6V0D1/SNX18/WIPI1/MAPK3/HMOX1/PRKACA/SLC25A5/ATP6V0A2/TOM1/TBC1D25/ERN1/NPC1/NOD2/QSOX1/GPSM1/CHMP4B/PIP4K2B/VDAC1/LRRK2/CAPNS1/ATP6V0B/PINK1/AKT1/SMCR8/ATG2A/MAPK8/RALB/ATP6V0A1/ULK1/SNX4/UBQLN4/C9orf72/SNX5/ATP6V0E1/ATP6V1E1/NOD1/ATP6V1B2/VPS13C/LARP1/PIP4K2A/CASP3/BNIP3/HIF1A/OPTN/SPTLC2/IRGM/ATP6V1D/ATG14/EXOC8/UBQLN2/GNAI3/NEDD4/TP53/ATP6V1C1/BNIP3L/CALCOC…	61
BP	GO:0002483	antigen processing and presentation of endogenous peptide antigen	12/5019	19/18903	0.000871161209545777	0.00754945273417384	0.00551080345444361	TAPBP/HFE/TAP1/TAP2/HLA-E/HLA-F/HLA-A/HLA-B/HLA-C/IDE/HLA-H/ERAP1	12
BP	GO:0002523	leukocyte migration involved in inflammatory response	12/5019	19/18903	0.000871161209545777	0.00754945273417384	0.00551080345444361	FFAR2/SLAMF1/TNF/SLAMF8/NINJ1/ALOX5/ADAM8/CCR6/S100A8/S100A9/FUT7/JAM3	12
BP	GO:0031397	negative regulation of protein ubiquitination	36/5019	84/18903	0.000872543880286904	0.00754945273417384	0.00551080345444361	N4BP1/SIRT7/RPL11/GLMN/PPIA/RPS20/RPS3/GTPBP4/RPS7/SMAD7/HSPA1A/HDAC8/HSPA1B/ABL1/PRMT3/SOX4/RPL37/ARRB2/AKT1/ARRB1/TSPO/FYN/USP4/MAD2L1/SPRY2/OGT/TNFAIP3/SPOPL/IVNS1ABP/CHP1/BUB3/PSEN1/GCLC/TRIM44/UFL1/CAV1	36
BP	GO:0051851	modulation by host of symbiont process	36/5019	84/18903	0.000872543880286904	0.00754945273417384	0.00551080345444361	PAIP1/INPP5K/EIF2AK4/SAP30BP/CCNK/NUCKS1/ZC3H12A/LEF1/SMARCA4/TFAP4/REST/PSMC3/TARDBP/RRP1B/CCL4/IGF2R/FASN/ZNF639/LTF/ZDHHC9/CX3CR1/SMARCB1/CCL5/ROCK2/PTX3/STOM/PPIB/DEFA1B/CCL3/SAP30/ZDHHC20/JUN/CSF1R/CCNT1/NAPEPLD/EEA1	36
BP	GO:0071496	cellular response to external stimulus	113/5019	328/18903	0.000874850742455353	0.00755918330710747	0.00551790638982509	TNFSF14/NUAK2/BAG3/MYD88/UPP1/SEH1L/CD40/SLC9A1/EIF2AK4/WDR45/SESN2/HNRNPA1/CNN2/MAP3K14/XBP1/ZC3H12A/CASP5/TTC5/CDA/KCNJ2/DCTPP1/WIPI1/TRIM24/MAPK3/HMOX1/FBXO22/TFEB/IRF1/TLR5/MTMR3/IMPACT/IL15/RXRA/RRAGC/PIEZO1/TLR8/WRN/ITGB3/FOXO1/AIFM1/EIF2S1/MLST8/MYBBP1A/BCL10/STK24/LRRK2/GABARAP/MAP1LC3B/VDR/GABARAPL1/MAP3K2/EIF2AK3/NCOA1/USF1/ITGA4/MAP1LC3B2/LYN/CASP2/CPEB4/COMT/MAPK8/RALB/CHEK1/MAPK1/FOX…	113
BP	GO:0016447	somatic recombination of immunoglobulin gene segments	28/5019	61/18903	0.000881763821444925	0.00760863410839251	0.00555400352906712	CD28/CD40/CD40LG/SLC15A4/PRKDC/MSH2/THOC1/MSH6/TBX21/UNG/ERCC1/TP53BP1/BCL6/RIF1/MLH1/EXOSC6/BATF/TCF3/CCR6/APLF/PTPRC/IL10/ATAD5/STAT6/TGFB1/TFRC/IL27RA/TNFSF13	28
BP	GO:0030433	ubiquitin-dependent ERAD pathway	37/5019	87/18903	0.000886721530274858	0.00764110170428227	0.00557770359659345	DNAJB2/CALR/TMUB2/STT3B/SGTB/FAF1/UBE2G2/ERLIN1/RHBDD2/RNF185/HSP90B1/VCP/HERPUD1/ERLEC1/ANKZF1/CANX/USP14/DNAJC10/RNF5/TMEM67/FAM8A1/UBXN8/AUP1/DNAJB12/DERL1/TRIM25/ERLIN2/YOD1/PSMC6/CCDC47/UBQLN2/EDEM3/SEC61B/SVIP/CAV1/MAN1A1/HSPA5	37
BP	GO:1903321	negative regulation of protein modification by small protein conjugation or removal	40/5019	96/18903	0.000912520127354416	0.00785283135168793	0.00573225790846423	N4BP1/SIRT7/RPL11/GLMN/PPIA/RPS20/RPS3/GTPBP4/RPS7/SMAD7/HSPA1A/HMG20A/HDAC8/HSPA1B/ABL1/PRMT3/SOX4/RPL37/ARRB2/AKT1/ARRB1/RELA/TSPO/FYN/TRIM21/USP4/MAD2L1/SPRY2/OGT/CAPN3/TNFAIP3/SPOPL/IVNS1ABP/CHP1/BUB3/PSEN1/GCLC/TRIM44/UFL1/CAV1	40
BP	GO:0061082	myeloid leukocyte cytokine production	24/5019	50/18903	0.000925658741373282	0.00795519084992038	0.00580697631472712	DDX1/MYD88/KIT/LITAF/LILRB1/HMOX1/NOD2/BCL10/RABGEF1/BCL6/MIF/MAVS/NOD1/PLCG2/LAPTM5/TLR7/TLR4/TGFB1/SYK/CD36/SEMA7A/P2RX7/NR4A3/EPX	24
BP	GO:0048002	antigen processing and presentation of peptide antigen	29/5019	64/18903	0.0009297353945665	0.00796817013567509	0.00581645068264382	HLA-DOB/SLC11A1/DNM2/TAPBP/HFE/CALR/CLEC4A/TAP1/PIKFYVE/FCGR2B/FCER1G/MR1/TAP2/HLA-E/HLA-F/CTSD/CTSS/IFI30/HLA-A/HLA-B/HLA-C/LGMN/FCGR1A/IDE/HLA-H/TAPBPL/ERAP1/MFSD6/PDIA3	29
BP	GO:0042060	wound healing	147/5019	442/18903	0.000929826761645318	0.00796817013567509	0.00581645068264382	BLK/ADORA2A/PPARD/EXT1/LCK/NRG1/CD40/CD40LG/SLC11A1/F5/TEC/THBD/METAP1/HPSE/CHMP7/IL6/IL1A/ABAT/CNN2/VAV1/PPIA/DGKA/SERPINA1/XBP1/SMPD1/LMAN1/WAS/RAB3A/TNF/HMOX1/CHMP2A/AK3/TREML1/ALOX5/SRSF6/CEACAM1/TGFBR2/PF4/FERMT3/EDN1/PF4V1/CHMP1A/ILK/ITGB3/CHMP4B/BLOC1S3/DYSF/B4GALT1/PRKCD/GP5/MYH9/GP6/GP1BA/TFPI/CLEC7A/RAF1/USF1/CHMP6/ANXA5/CFLAR/LYN/PLAUR/LRG1/MIR29A/ITPK1/SCARB1/CHMP3/PRCP/FCER1G/PTK7/CL…	147
BP	GO:0022604	regulation of cell morphogenesis	108/5019	312/18903	0.000930907583883218	0.00796817013567509	0.00581645068264382	CAPRIN1/OLFM4/C1QBP/ZMYM4/EPHA4/DNM2/KIT/SEMA4A/FGD3/WDR1/RHOF/CALR/PRKDC/RNF157/MYO9A/CAPZB/MYO10/LARP4/FGR/EEF2K/TBCCD1/ZMYM3/WDPCP/ITGB2/CDC42EP3/RAC2/DBNL/SEMA4D/ILK/TBC1D24/RCC2/ITGB3/ST6GAL1/ABL1/RHOG/NEDD9/CDC42SE1/CFDP1/HCK/ARAP3/BCL9L/MYH9/PTK2B/PLXNC1/BRWD1/FYN/CDKL5/PLXND1/MYL12B/RAB21/CUL7/ARAP1/RHOBTB3/FGD2/DVL3/TRIOBP/RREB1/PREX1/MACF1/ARHGAP35/MSN/GBP1/DLG1/LST1/LIMD1/RHOB/RHOQ/PRP…	108
BP	GO:0033006	regulation of mast cell activation involved in immune response	18/5019	34/18903	0.000950163290749089	0.00811127380647486	0.00592091073175667	BLK/IL4R/STXBP2/VAMP8/FGR/HMOX1/RAC2/RABGEF1/LYN/FER/C12orf4/SNX4/GATA2/CD300A/SYK/UNC13D/LGALS9/PTPN6	18
BP	GO:0061081	positive regulation of myeloid leukocyte cytokine production involved in immune response	18/5019	34/18903	0.000950163290749089	0.00811127380647486	0.00592091073175667	DDX1/MYD88/KIT/LILRB1/NOD2/BCL10/MIF/MAVS/NOD1/PLCG2/LAPTM5/TLR7/TLR4/SYK/CD36/SEMA7A/P2RX7/NR4A3	18
BP	GO:1901654	response to ketone	75/5019	205/18903	0.00096907617724065	0.00826169743636896	0.00603071406299655	CCR7/WBP2/RPLP0/CDK4/AXIN2/F5/POR/CYP1B1/CALR/ABCB4/UBE3A/TGFBR3/CDA/ACACA/BMI1/PSPH/MTAP/SMYD3/SGK1/MBP/PTGDR/EDN1/RPL27/GNG2/AIFM1/IGFBP7/PARP1/TFAP4/HNRNPD/AKT1/TSPO/CFLAR/NASP/CD38/ARG1/TYMS/TXNIP/NCF1/CALM3/FOXO3/MSN/SRD5A1/KLF2/AKR1C3/NQO1/FDX1/CYBB/ROCK2/PTAFR/LARP1/GLB1/GOLPH3/GNAI1/ADCY6/FOS/HOXA9/PRKAA1/PCNA/FBP1/BCL2L1/HOXA10/TGFB1/CBL/THBS1/ADCY3/CYBA/TLR2/ASS1/NCOA4/ABHD2/DDIT4/SPP1/…	75
BP	GO:0009620	response to fungus	30/5019	67/18903	0.000972646229807451	0.00828109186869353	0.00604487123549826	MYD88/ZBP1/CLEC6A/CLEC4A/GNLY/CLEC4E/SPI1/COTL1/CLEC4D/S100A12/BCL10/CLEC7A/LTF/CLEC4C/CX3CR1/ARG1/SCIMP/S100A8/S100A9/IL17RA/JAGN1/PLCG2/PTX3/DEFA1B/TLR4/MALT1/DEFA4/USP15/SYK/MPO	30
BP	GO:0002714	positive regulation of B cell mediated immunity	21/5019	42/18903	0.00098078920734741	0.0083061803864627	0.0060631848663345	CD28/CD40/XCL1/MSH2/TNF/TBX21/NOD2/CD226/TP53BP1/RIF1/MLH1/FCER2/EXOSC6/HLA-E/PTPRC/ATAD5/STAT6/FCGR1A/TGFB1/TFRC/TNFSF13	21
BP	GO:0002891	positive regulation of immunoglobulin mediated immune response	21/5019	42/18903	0.00098078920734741	0.0083061803864627	0.0060631848663345	CD28/CD40/XCL1/MSH2/TNF/TBX21/NOD2/CD226/TP53BP1/RIF1/MLH1/FCER2/EXOSC6/HLA-E/PTPRC/ATAD5/STAT6/FCGR1A/TGFB1/TFRC/TNFSF13	21
BP	GO:0043029	T cell homeostasis	21/5019	42/18903	0.00098078920734741	0.0083061803864627	0.0060631848663345	TNFSF14/IL7R/RPS6/SLC46A2/BCL2L11/STAT5B/ZC3H8/AKT1/SPNS2/GPAM/TCIRG1/RIPK3/SLC39A3/JAK3/CASP3/RC3H1/FAS/CORO1A/LGALS9/P2RX7/LGALS2	21
BP	GO:2000403	positive regulation of lymphocyte migration	21/5019	42/18903	0.00098078920734741	0.0083061803864627	0.0060631848663345	TNFSF14/XCL2/XCL1/TNFRSF14/ADAM8/ITGB3/ABL1/NEDD9/CCL20/SPN/PTK2B/CCL4/ITGA4/OXSR1/CCL5/CCR2/CCL3/WNK1/CORO1A/APP/DOCK8	21
BP	GO:0000075	cell cycle checkpoint signaling	69/5019	186/18903	0.000988137799148294	0.00835734535417221	0.00610053327962063	RPL26/EIF2AK4/TRIM39/RNASEH2B/RAD17/NAE1/PRKDC/FOXO4/MSH2/THOC1/PTPN11/SETMAR/BLM/CCNG1/TIPRL/RAD1/PLK3/INTS7/TRIAP1/HORMAD1/ETAA1/ZWILCH/TP53BP1/ZW10/DUSP1/RAD9A/NSUN2/RAD50/KNTC1/TTI1/CASP2/ATR/CDC14B/CHEK1/MAPK14/SPDL1/CDKN1B/PLK2/MAD2L1/PRPF19/ANAPC15/PCID2/BRCA2/TIPIN/TRIP13/NABP1/CDK5RAP3/RBBP8/GEN1/BRCA1/RINT1/BRCC3/BUB3/BRIP1/TAOK3/CDC45/CCNB1/BUB1/ATM/CDKN1A/TOPBP1/DTL/CDC6/TTK/TP53/CENP…	69
BP	GO:0006997	nucleus organization	54/5019	139/18903	0.000999378575780972	0.00842801746919482	0.0061521211429152	SEH1L/RPS19/SYNE1/CHMP7/LEMD2/SERBP1/RCC1/NUP133/ETS1/NUP107/UBXN2A/NDC1/CHMP2A/LMNB2/POLR1B/CHMP1A/CHMP4B/PHF2/NUP35/NDEL1/NUP54/TARDBP/SUMO1P1/CHMP6/NUP155/NOLC1/CHMP3/TOR1B/SRPK2/NUP205/WDR73/CHEK1/PITPNB/SUN2/RRN3/SMARCA5/AGFG1/UBXN2B/CHMP2B/ACTR6/ANKLE2/USPL1/BAZ2A/DDX11/CHMP1B/PRKCB/PRKCA/TOR1A/NEK6/TMF1/ATXN7/PLEC/LMNA/SRPK1	54
BP	GO:0002755	MyD88-dependent toll-like receptor signaling pathway	14/5019	24/18903	0.00100044811684687	0.00842801746919482	0.0061521211429152	MYD88/TNIP1/TLR10/IRAK2/IRF1/TLR5/TLR1/TLR8/CD300LF/CD300A/IRAK4/TLR6/TLR4/TLR2	14
BP	GO:2000637	positive regulation of miRNA-mediated gene silencing	14/5019	24/18903	0.00100044811684687	0.00842801746919482	0.0061521211429152	IL6/FXR1/TIAL1/ZFP36/DHX9/PUM2/MAP2K1/TRUB1/LIMD1/MYCN/STAT3/TRIM71/TGFB1/TP53	14
BP	GO:0021915	neural tube development	62/5019	164/18903	0.0010072109577073	0.00847382482050059	0.00618555870702791	ADM/ZFP36L1/PKD2/GLMN/RARA/HES1/RNF220/KAT2A/NUP133/BMI1/MTHFR/RPS7/PRKACB/MIB1/IFT140/PRKACA/WDPCP/CBY1/IFT172/MTHFD1/HECTD1/MKS1/ABL1/BCL10/CLUAP1/SOX4/DEAF1/MTHFD1L/PKD1/STK4/IFT122/ITPK1/TMED2/RPGRIP1L/PTK7/DVL3/SEMA3C/MARCKS/OPA1/ARHGAP35/RALA/VASP/PFN1/ST14/LUZP1/KDM2B/WDR19/CASP3/HIF1A/NPHP3/TRIM71/SPINT1/DLC1/PSEN1/FKBP8/KIF20B/TGFB1/PTCH1/NF1/PHGDH/ATP6AP2/APAF1	62
BP	GO:1903052	positive regulation of proteolysis involved in protein catabolic process	53/5019	136/18903	0.00101784016417689	0.00855199738468733	0.00624262160309889	DNAJB2/ZFAND2A/AXIN2/SUMO2/GSK3A/KEAP1/SMAD7/PLK3/FBXO22/RNF185/HECTD1/RNF19B/HSPA1A/HSPA1B/VCP/CSNK1D/LRRK2/CLU/HERPUD1/GABARAP/ATXN3/RNF144B/PSMC3/PIAS1/SOCS5/AKT1/PTK2B/USP13/FBXW7/PSMC2/SOCS4/TMTC3/DET1/CSNK1E/TRIB1/PSMC6/DDA1/RNF144A/SH3RF1/LAPTM5/PSEN1/GCLC/UBQLN2/FBXW8/TRIB2/CBFA2T3/PYHIN1/PTEN/CEBPA/AGTPBP1/RNFT1/MDM2/CAV1	53
BP	GO:1901987	regulation of cell cycle phase transition	150/5019	453/18903	0.00101969397349125	0.00855632974606702	0.00624578405644456	NPM1/ZFP36L1/RPL26/CDK4/EIF2AK4/TRIM39/APEX1/RNASEH2B/RAD17/APPL1/NAE1/KLHL18/PKD2/SMARCC1/ANAPC5/PRKDC/MECP2/FOXO4/CPSF3/MSH2/THOC1/PTPN11/SETMAR/BLM/CCNG1/CDC23/HSPA2/TIPRL/RAD1/CENPJ/PLK3/BTN2A2/GPR132/ID2/ANAPC7/ACTL6A/INTS7/SMARCA4/TRIAP1/CTC1/HORMAD1/ETAA1/CDC16/PAF1/RCC2/PHF10/ZWILCH/STXBP4/SMARCE1/CCND3/ANKRD17/LSM11/TP53BP1/ZW10/TFAP4/DUSP1/PLCB1/MTBP/RAD9A/NSUN2/PBRM1/RAD50/WEE1/KNTC1/A…	150
BP	GO:0002244	hematopoietic progenitor cell differentiation	52/5019	133/18903	0.00103574443310662	0.00866825903832953	0.00632748803581534	FLT3/MYB/EXT1/CDK6/GATA3/KIT/EEF2/AGPAT5/PRKDC/RARA/HES1/PUS7/PDCD2/NUDT21/YTHDF2/ARMC6/SPI1/ABL1/ZFP36/SOX4/RBM47/REST/METTL14/LYN/METTL3/BATF/OSM/C12orf29/XRCC5/PCID2/LMBR1L/GATA2/PTPRC/CHD2/RRS1/PLEK/CEBPD/PSEN1/CSF1R/SH2B3/SBDS/TGFB1/DHTKD1/UFL1/ARL11/JAM3/SOS2/TP53/PTPN6/TOP2A/INHBA/FOXC1	52
BP	GO:0035303	regulation of dephosphorylation	52/5019	133/18903	0.00103574443310662	0.00866825903832953	0.00632748803581534	FCRL3/INPP5K/IFNG/VRK3/MTMR1/PPIA/MTMR2/SMPD1/CSNK2B/PPP1R15A/URI1/TNF/LILRB2/TIPRL/MTMR3/SLC39A10/SEMA4D/HSP90B1/PRKCD/HSP90AB1/PINK1/GNAI2/ARPP19/ITGA1/CALM3/PPP6R1/STYXL1/RIPK3/FKBP1A/IGBP1/CALM1/LGALS3/PPP1R2/CNEP1R1/PPP2R5A/PPP1R15B/PTPRC/ROCK2/YWHAE/PPP1R26/CDK5RAP3/CD300A/IQGAP1/ANKLE2/CHP1/PLEK/DLC1/SMAD3/PPP1R16B/TGFB1/BOD1L1/YWHAB	52
BP	GO:0016045	detection of bacterium	11/5019	17/18903	0.00108012765230919	0.00900434968561276	0.00657282098447673	NLRC4/TLR1/NOD2/PGLYRP1/NOD1/NAIP/HLA-A/HLA-B/TLR6/CD1D/TLR2	11
BP	GO:0033631	cell-cell adhesion mediated by integrin	11/5019	17/18903	0.00108012765230919	0.00900434968561276	0.00657282098447673	CD3E/SKAP1/FERMT3/DPP4/PIEZO1/ITGA4/ADA/ADAM9/CCL5/WNK1/ITGA5	11
BP	GO:0070200	establishment of protein localization to telomere	11/5019	17/18903	0.00108012765230919	0.00900434968561276	0.00657282098447673	CCT2/CCT6A/CCT4/CCT8/CCT7/CCT3/DKC1/POT1/CCT5/BRCA2/TERF1	11
BP	GO:0043620	regulation of DNA-templated transcription in response to stress	22/5019	45/18903	0.00109970935995092	0.00914374726596382	0.00667457573338221	BAG3/MAPK7/HMOX1/MBTPS2/IMPACT/RGS14/CHD6/RELA/CHEK1/RPS6KA1/NCK2/KLF2/TMBIM6/HIF1A/VEGFA/DDIT3/JUN/BCLAF1/NEDD4/TP53/EGR1/HSPA5	22
BP	GO:2000785	regulation of autophagosome assembly	22/5019	45/18903	0.00109970935995092	0.00914374726596382	0.00667457573338221	WDR45/PIP4K2C/SNX18/WIPI1/MTMR3/CHMP4B/PIP4K2B/LRRK2/PINK1/SMCR8/PIKFYVE/ATG2A/RNF5/RALB/ULK1/SNX4/C9orf72/IFT88/RAB1B/PIP4K2A/UBQLN2/TBC1D12	22
BP	GO:0034110	regulation of homotypic cell-cell adhesion	19/5019	37/18903	0.00112236989276779	0.00929589779061822	0.00678563962985055	BLK/ZNF703/IL6/ABAT/CEACAM1/PRKCD/ANK3/GP6/LYN/PLAUR/CCL5/IL6ST/RDX/JAK1/PRKCA/SH2B3/SYK/ALOX12/CD9	19
BP	GO:0051084	'de novo' post-translational protein folding	19/5019	37/18903	0.00112236989276779	0.00929589779061822	0.00678563962985055	HSPA6/ST13/CCT2/DNAJB1/HSPA1L/HSPA7/TOR2A/HSPA2/HSPA1A/HSPA1B/PTGES3/TOR1B/SDF2/DNAJB12/HSPA13/HSPE1/TOR1A/HSPH1/HSPA5	19
BP	GO:1904358	positive regulation of telomere maintenance via telomere lengthening	19/5019	37/18903	0.00112236989276779	0.00929589779061822	0.00678563962985055	CCT2/CCT6A/CCT4/CCT8/HNRNPA1/CCT7/CCT3/MAPKAPK5/DKC1/POT1/MAPK3/PARN/CCT5/NAF1/ATR/MAPK1/XRCC5/TNKS/ATM	19
BP	GO:0033627	cell adhesion mediated by integrin	37/5019	88/18903	0.00114340673738967	0.00945788186140949	0.00690388162808713	EXT1/CD3E/CYP1B1/IFT74/PTPN11/SKAP1/ITGB2/ICAM1/FERMT3/ITGAX/DPP4/PIEZO1/ITGB3/ITGAL/ITGAM/ITGA4/LYN/ADA/ITGA1/ADAM9/CCL5/ITGA7/ITGA9/P2RY12/WNK1/ITGA2B/SYK/PIK3CG/JAM3/ITGB7/TESC/PTPN6/ITGB8/ITGAE/FERMT1/ITGA5/PDE3B	37
BP	GO:0042306	regulation of protein import into nucleus	27/5019	59/18903	0.00114540910857388	0.00946220392793459	0.006907036566594	BAG3/IPO5/IFNG/RAN/ZC3H12A/HCLS1/PRKCD/HSP90AB1/NUP54/TARDBP/NOLC1/MAPK14/ANGPT1/EFCAB7/UFM1/MAVS/TRIM28/JUP/CHP1/PTGS2/PSEN1/SMAD3/PIK3R1/TGFB1/NF1/CD36/FERMT1	27
BP	GO:0070828	heterochromatin organization	38/5019	91/18903	0.00115196711951769	0.00950410033831755	0.00693761929771332	KDM1A/MECP2/HDAC2/ZNFX1/MTHFR/SNAI1/LMNB2/POLE3/SETDB2/PPHLN1/HAT1/EZH1/FAM172BP/PHF2/RIF1/ZDBF2/CENPV/MBD2/SCMH1/HMGB1/DNMT1/HP1BP3/UBR2/SMARCA5/DNMT3A/TRIM28/CTR9/HELLS/SMCHD1/BAZ2A/SPTY2D1/LMNA/L3MBTL3/ATF7IP2/TET1/PRDM16/EZH2/SETD7	38
BP	GO:0032436	positive regulation of proteasomal ubiquitin-dependent protein catabolic process	39/5019	94/18903	0.0011573260968658	0.00953600910226795	0.00696091143991177	DNAJB2/ZFAND2A/AXIN2/SUMO2/GSK3A/KEAP1/SMAD7/PLK3/FBXO22/HECTD1/RNF19B/HSPA1A/HSPA1B/VCP/CSNK1D/LRRK2/CLU/HERPUD1/GABARAP/RNF144B/PIAS1/SOCS5/AKT1/SOCS4/DET1/CSNK1E/TRIB1/DDA1/RNF144A/SH3RF1/PSEN1/GCLC/UBQLN2/FBXW8/TRIB2/CBFA2T3/CEBPA/MDM2/CAV1	39
BP	GO:0034620	cellular response to unfolded protein	41/5019	100/18903	0.00115943212683274	0.0095410669484795	0.0069646034686397	HSPA6/BAG3/HSPA1L/HSPA7/XBP1/PPP1R15A/TM7SF3/HSPA2/RHBDD2/MBTPS2/ERMP1/BCL2L11/ERN1/HSPA1A/CREB3/HSPA1B/TMTC4/EIF2S1/CREB3L4/VCP/HERPUD1/ERLEC1/EIF2AK3/DNAJC10/ABCA7/PTPN1/TMED2/NCK2/DERL1/MBTPS1/PPP1R15B/TMBIM6/HSPA13/CDK5RAP3/OPTN/YOD1/DDIT3/CREBZF/PIK3R1/UFL1/HSPA5	41
BP	GO:0045766	positive regulation of angiogenesis	69/5019	187/18903	0.0011651578681638	0.00956356791917759	0.00698102829192391	ADM/CD40/IL1A/CYP1B1/XBP1/ZC3H12A/CXCR2/PDCL3/ETS1/HMOX1/PIK3CD/NINJ1/PRKD2/CCR3/TGFBR2/C5/ITGAX/C5AR1/ITGB3/CHI3L1/ABL1/TNFSF12/TIE1/GRN/PTK2B/CTSH/SASH1/ANXA3/LRG1/MIR29A/WARS2/MIR181B1/CX3CR1/PLCG1/IL1B/RHOB/GATA2/CYBB/PIK3R6/HSPB1/AGGF1/JUP/CXCR4/IL10/BTG1/STAT3/HIF1A/BRCA1/VEGFA/PKM/CD34/JAK1/KLF4/RRAS/PRKCB/SMAD1/PRKCA/MIR20A/AKT3/THBS1/HGF/ERAP1/MTDH/HK2/CAMP/TMIGD2/ITGB8/ANGPT2/ITGA5	69
BP	GO:1904018	positive regulation of vasculature development	69/5019	187/18903	0.0011651578681638	0.00956356791917759	0.00698102829192391	ADM/CD40/IL1A/CYP1B1/XBP1/ZC3H12A/CXCR2/PDCL3/ETS1/HMOX1/PIK3CD/NINJ1/PRKD2/CCR3/TGFBR2/C5/ITGAX/C5AR1/ITGB3/CHI3L1/ABL1/TNFSF12/TIE1/GRN/PTK2B/CTSH/SASH1/ANXA3/LRG1/MIR29A/WARS2/MIR181B1/CX3CR1/PLCG1/IL1B/RHOB/GATA2/CYBB/PIK3R6/HSPB1/AGGF1/JUP/CXCR4/IL10/BTG1/STAT3/HIF1A/BRCA1/VEGFA/PKM/CD34/JAK1/KLF4/RRAS/PRKCB/SMAD1/PRKCA/MIR20A/AKT3/THBS1/HGF/ERAP1/MTDH/HK2/CAMP/TMIGD2/ITGB8/ANGPT2/ITGA5	69
BP	GO:0043030	regulation of macrophage activation	28/5019	62/18903	0.00120490472067397	0.00987712921024281	0.0072099156969884	IL4R/IL6/GPR137B/ZC3H12A/NR1D1/RORA/LDLR/LRRK2/MIF/MIR128-1/MMP8/GRN/FCGR2B/MIR142/PTPRC/IL10/TLR6/CCL3/TLR4/BPI/HAVCR2/ATM/CEBPA/THBS1/CD200/CST7/STAP1/IL1RL1	28
BP	GO:0061028	establishment of endothelial barrier	23/5019	48/18903	0.00121061621774578	0.00990320385739987	0.00722894916347744	MYD88/HPSE/ZDHHC21/TNF/ICAM1/S1PR3/PLCB1/RAPGEF1/RAP1A/FASN/PECAM1/ADD1/IL1B/MSN/ROCK2/EZR/VEGFA/RDX/TNFRSF1A/F2RL1/PPP1R16B/MYADM/VCL	23
BP	GO:0019693	ribose phosphate metabolic process	156/5019	475/18903	0.00121118320558128	0.00990320385739987	0.00722894916347744	ATP6V0C/OGDH/GTPBP1/UPP1/PANK4/IFNG/VPS9D1/RAN/UCK2/RNASEH2B/PFKFB2/PAICS/NME2/CTPS2/STOML2/IMPDH2/SUCLA2/DGAT2/GMPS/OLA1/ATIC/ARL2/NADK/HINT1/NDUFS4/CDA/HK3/PPAT/PDE5A/ACACA/DLAT/UMPS/NME7/ALDOC/CARD11/NME1/RORA/GART/AK3/G6PD/TMSB4X/PFAS/MTHFD1/NDUFB7/CTPS1/APRT/MCCC2/HSPA1A/HPRT1/PRPS2/ADSL/HSPA1B/NDUFS1/NDUFS3/GIMAP7/DHODH/IMPDH1/NDUFB5/MLST8/DNM1L/UPB1/VCP/PARP1/ITPA/LRRK2/AMPD3/DGAT1/PDHB/AM…	156
BP	GO:0042770	signal transduction in response to DNA damage	67/5019	181/18903	0.00123662895160388	0.0100902813624056	0.00736550838136186	NPM1/RPL26/EIF2AK4/TRIM39/KDM1A/SESN2/RNASEH2B/RAD17/PRKDC/FOXO4/MSH2/THOC1/PTPN11/BLM/CCNG1/BCL3/TIPRL/SNAI1/RAD1/PLK3/INTS7/TRIAP1/GRB2/ETAA1/ABL1/ZNF385A/TP53BP1/TFAP4/MIF/SOX4/RAD9A/USP10/TTI1/EEF1E1/CASP2/BATF/ATR/SMYD2/CDC14B/CHEK1/MAPK14/FOXO3/CDKN1B/PLK2/PRPF19/SP100/BRCA2/TIPIN/CDK5RAP3/BID/BRCA1/RINT1/BRCC3/ATAD5/BRIP1/TAOK3/COPS3/ATM/GADD45A/CDKN1A/PYHIN1/TOPBP1/DTL/TP53/CLSPN/TICRR/MD…	67
BP	GO:1903322	positive regulation of protein modification by small protein conjugation or removal	53/5019	137/18903	0.00123721936004473	0.0100902813624056	0.00736550838136186	NPM1/TNIP1/GNL3/UBA2/KDM1A/GSK3A/RASSF5/UBE3A/ZC3H12A/BMI1/MTA1/SMAD7/FANCM/DCUN1D5/RPS2/UBE2V2/RNF111/HUWE1/DCUN1D4/COMMD1/NOD2/BIRC3/VCP/BCL10/LRRK2/GABARAP/AMER1/PIAS1/PINK1/UBE2D1/TBC1D7/SKP2/MYCBP2/CDC14B/ANGPT1/FBXW7/FKBP1A/DERL1/TOPORS/FBXO33/CDK5RAP3/TANK/BRCA1/LAPTM5/MALT1/PELI1/CBLB/PTEN/AIMP2/FANCI/PTPN22/CAV1/HSPA5	53
BP	GO:0002717	positive regulation of natural killer cell mediated immunity	17/5019	32/18903	0.00124581655577387	0.0101088211391093	0.0073790416888877	NCR3/KIR2DL4/SH2D1B/RASGRP1/VAV1/CD160/CRTAM/KLRD1/KLRC4/CD226/STAT5B/KLRC2/SLAMF6/KLRC3/AP1G1/HLA-E/HLA-F	17
BP	GO:0006221	pyrimidine nucleotide biosynthetic process	17/5019	32/18903	0.00124581655577387	0.0101088211391093	0.0073790416888877	UPP1/UCK2/NME2/CTPS2/CDA/UMPS/NME7/NME1/DCTD/CTPS1/DHODH/DUT/CMPK1/TYMS/CAD/DCK/NME4	17
BP	GO:0008156	negative regulation of DNA replication	17/5019	32/18903	0.00124581655577387	0.0101088211391093	0.0073790416888877	PDS5A/RAD17/S100A11/BLM/ZRANB3/TSPYL2/GTPBP4/BCL6/LIG3/ATR/BRCA2/TTF1/TERF1/TIPIN/GMNN/CDC6/TP53	17
BP	GO:0043304	regulation of mast cell degranulation	17/5019	32/18903	0.00124581655577387	0.0101088211391093	0.0073790416888877	BLK/IL4R/STXBP2/VAMP8/FGR/HMOX1/RAC2/RABGEF1/LYN/FER/C12orf4/SNX4/GATA2/CD300A/SYK/UNC13D/LGALS9	17
BP	GO:0008033	tRNA processing	52/5019	134/18903	0.00126162867315262	0.0102241492219745	0.00746322665166931	DDX1/DTWD1/TARBP1/TRMT61B/TYW3/POP5/THADA/RPP40/METTL8/NAT10/PUS7/THUMPD2/METTL2A/TRMT11/SSB/TRUB2/RPP30/ELP4/METTL2B/ELP2/TSEN2/THG1L/METTL1/TRMT13/ADAT2/ELP3/OSGEPL1/NSUN2/GRSF1/TRNT1/FAM98A/DUS3L/PUS10/POLR3K/FARS2/RTCB/TSEN15/TRIT1/OSGEP/DTWD2/ANKRD16/ELP5/TRMT10C/CDKAL1/TYW5/TRUB1/TRMT5/ELAC2/PUS3/TRMT1/NSUN6/WDR6	52
BP	GO:0001659	temperature homeostasis	66/5019	178/18903	0.00127347181442491	0.0103064999200154	0.00752333942106055	IL4R/GADD45G/ALPL/LCN2/MFN2/SLC25A44/KDM1A/IL1A/ABAT/NR1H2/DOCK7/HADH/TNF/NR1D1/CMKLR1/IRF4/EHMT1/IL15/MAP2K6/KDM6B/ADIPOR1/FOXO1/ALMS1/IL18/TLE3/TFE3/G0S2/NTSR1/ACOT11/PGAM5/PLCL2/FH/IL18R1/ACOT13/OMA1/ZBTB7B/PLCL1/IL1B/ACSL1/FABP5/PTH2R/ADIPOR2/OGT/CCR2/NPR3/CXCR4/UCP2/STAT3/VEGFA/DYNC1H1/STAT6/PTGS2/DDIT3/TLR4/DECR1/SYK/PLAC8/NAPEPLD/CD36/GRB10/PRDM16/ALDH1A1/CAV1/IGF1R/EGR1/PDGFC	66
BP	GO:0000184	nuclear-transcribed mRNA catabolic process, nonsense-mediated decay	20/5019	40/18903	0.00128709588413507	0.0103064999200154	0.00752333942106055	EIF3E/NCBP2/PARN/NCBP1/HNRNPAB/DHX34/MAGOHB/UPF1/EIF4A3/CASC3/UPF3A/DCP1B/GSPT2/NBAS/EXOSC10/GSPT1/PNRC2/UPF2/RBM8A/UPF3B	20
BP	GO:0007007	inner mitochondrial membrane organization	20/5019	40/18903	0.00128709588413507	0.0103064999200154	0.00752333942106055	APOOL/AFG3L2/LETM1/MTX2/MTX1/CHCHD3/TIMM13/TIMM9/SAMM50/IMMT/PINK1/OMA1/SLC25A46/TIMM10B/OPA1/AGK/DNAJC11/APOO/TIMM8B/MTX3	20
BP	GO:0048246	macrophage chemotaxis	20/5019	40/18903	0.00128709588413507	0.0103064999200154	0.00752333942106055	CYP19A1/SLAMF1/SLAMF8/MAPK3/CMKLR1/C5/C5AR1/MIF/PTK2B/MAPK1/CCL5/LGALS3/CCL3/CKLF/MMP2/CSF1R/THBS1/CSF1/AZU1/STAP1	20
BP	GO:0002223	stimulatory C-type lectin receptor signaling pathway	13/5019	22/18903	0.00128790951455932	0.0103064999200154	0.00752333942106055	KLRD1/CLEC6A/KLRC4/KLRC2/KLRC3/CLEC7A/LYN/FYN/TYROBP/CREBBP/PLCG2/PAK1/SYK	13
BP	GO:0006268	DNA unwinding involved in DNA replication	13/5019	22/18903	0.00128790951455932	0.0103064999200154	0.00752333942106055	BLM/SSBP1/WRN/MCM3/MCM4/MCM6/GINS2/GINS1/MCM7/CDC45/MCM2/RPA1/MCM5	13
BP	GO:0010042	response to manganese ion	13/5019	22/18903	0.00128790951455932	0.0103064999200154	0.00752333942106055	EIF2S1/SOD2/LRRK2/EIF2AK3/TSPO/BACE1/ARG1/ADAM9/PTGS2/TFRC/SLFN14/APP/HSPA5	13
BP	GO:0043371	negative regulation of CD4-positive, alpha-beta T cell differentiation	13/5019	22/18903	0.00128790951455932	0.0103064999200154	0.00752333942106055	IL4R/ZC3H12A/TBX21/SMAD7/RUNX3/BCL6/SOCS5/CBFB/ZBTB7B/HMGB1/JAK3/RC3H1/HLX	13
BP	GO:1990840	response to lectin	13/5019	22/18903	0.00128790951455932	0.0103064999200154	0.00752333942106055	KLRD1/CLEC6A/KLRC4/KLRC2/KLRC3/CLEC7A/LYN/FYN/TYROBP/CREBBP/PLCG2/PAK1/SYK	13
BP	GO:1990858	cellular response to lectin	13/5019	22/18903	0.00128790951455932	0.0103064999200154	0.00752333942106055	KLRD1/CLEC6A/KLRC4/KLRC2/KLRC3/CLEC7A/LYN/FYN/TYROBP/CREBBP/PLCG2/PAK1/SYK	13
BP	GO:0030225	macrophage differentiation	24/5019	51/18903	0.00131260471944016	0.0104909932201255	0.00765801227104959	IFNG/MMP9/ID2/PF4/IL15/SPI1/HCLS1/PARP1/CD4/GATA2/TRIB1/VEGFA/PRKCA/CSF1R/TGFB1/CEBPA/NKX2-3/TSPAN2/APP/L3MBTL3/TLR2/CSF1/CEBPE/INHBA	24
BP	GO:0045954	positive regulation of natural killer cell mediated cytotoxicity	15/5019	27/18903	0.00131857755164217	0.010494413013387	0.00766050858557495	NCR3/RASGRP1/VAV1/CD160/CRTAM/KLRD1/KLRC4/CD226/STAT5B/KLRC2/SLAMF6/KLRC3/AP1G1/HLA-E/HLA-F	15
BP	GO:1904376	negative regulation of protein localization to cell periphery	15/5019	27/18903	0.00131857755164217	0.010494413013387	0.00766050858557495	ABI3/TMBIM1/HECTD1/NUMB/LZTFL1/GOPC/CSK/LYPLA1/PICALM/GBP1/RHOQ/PPP2R5A/PPFIA1/BCL2L1/TGFB1	15
BP	GO:0000463	maturation of LSU-rRNA from tricistronic rRNA transcript (SSU-rRNA, 5.8S rRNA, LSU-rRNA)	10/5019	15/18903	0.00131959775770459	0.010494413013387	0.00766050858557495	RPL7/RPL35/RPL7L1/WDR12/ZNHIT6/GTPBP4/RPF2/URB1/DDX18/NOL9	10
BP	GO:0097212	lysosomal membrane organization	10/5019	15/18903	0.00131959775770459	0.010494413013387	0.00766050858557495	CHMP7/CHMP2A/CHMP1A/CHMP4B/CHMP6/CHMP3/CHMP2B/LAPTM5/CHMP1B/LAPTM4B	10
BP	GO:0045786	negative regulation of cell cycle	135/5019	405/18903	0.00132821423440042	0.0105498159189519	0.0077009505267492	IPO7/NPM1/ZFP36L1/CDK6/RPL26/GATA3/IPO5/EIF2AK4/TRIM39/RNASEH2B/RAD17/NAE1/PKD2/PRKDC/LILRB1/FOXO4/MSH2/KAT2A/THOC1/PTPN11/SETMAR/BLM/CCNG1/TNF/TSPYL2/TIPRL/CHMP2A/RAD1/PLK3/BTN2A2/GPR132/INTS7/TRIAP1/HORMAD1/ETAA1/PPP1R13B/ABL1/ZWILCH/TP53BP1/ZW10/TFAP4/DUSP1/RUNX3/BCL6/MTBP/BTG2/RAD9A/NR4A1/NSUN2/RAD50/WEE1/KNTC1/TTI1/AVEN/MIR29A/CASP2/BRD7/CDK2AP2/ATR/HECA/CDC14B/CHEK1/TERF2/MAPK14/PTTG2/TMEM6…	135
BP	GO:0007254	JNK cascade	64/5019	172/18903	0.00134928392921471	0.0106909370205889	0.00780396337837959	TRAF1/CCR7/GADD45G/DUSP16/MYD88/IL1A/MINK1/CD27/RASGRP1/SLAMF1/TNF/PRMT1/FKTN/MBIP/GADD45B/ZMYND11/SIRPA/ZNF675/GSTP1/NOD2/EPHB1/PHLPP1/MAP4K3/LRRK2/PLCB1/SH2D3C/MAP3K11/PINK1/MMP8/PTK2B/FCGR2B/TRAF3/MAPK8/HMGB1/NCF1/IL1B/SDCBP/NOD1/NAIP/RASSF2/NFKB1/TRIB1/ULK4/IRAK4/SH3RF1/CYLD/TLR7/TAOK3/TLR4/EDA2R/F2RL1/SMAD3/GADD45A/MAP4K4/APP/TNIK/ARHGEF6/PDCD4/DUSP10/DUSP22/PTPN22/IGF1R/TRAF5/MAP3K5	64
BP	GO:0044282	small molecule catabolic process	129/5019	385/18903	0.00134932533243904	0.0106909370205889	0.00780396337837959	PPARD/ESD/GLYCTK/ACADM/INPP5K/UPP1/SLC25A44/SESN2/GSK3A/ABAT/PFKFB2/CPT1A/GCSH/MTMR2/QDPR/BLMH/ACAA1/HIBADH/ECHS1/MCCC1/CDA/NQO2/HK3/CYP4F3/HADH/ALDH1B1/ADH5/ABCD2/NPL/FAH/MTHFS/AASDHPPT/HIBCH/GK/MCCC2/ALDH6A1/BCKDHB/APOBEC3A/AHCY/BDH2/OCRL/NAGK/UPB1/SYNJ1/ETFA/AFMID/DERA/LRP5/IVD/AKR1A1/PCCB/DBT/ALDH2/NTSR1/SRD5A3/GALM/GCDH/AKT1/CSAD/PFKP/DLD/SULT1B1/SLC25A17/SCARB1/BCKDK/GNPDA2/HSD17B4/APOBEC3B…	129
BP	GO:0009259	ribonucleotide metabolic process	153/5019	466/18903	0.00135919250458211	0.0107557882107649	0.0078513021955668	ATP6V0C/OGDH/GTPBP1/UPP1/PANK4/IFNG/VPS9D1/RAN/UCK2/RNASEH2B/PFKFB2/PAICS/NME2/CTPS2/STOML2/IMPDH2/SUCLA2/DGAT2/GMPS/OLA1/ATIC/ARL2/NADK/HINT1/NDUFS4/CDA/HK3/PPAT/PDE5A/ACACA/DLAT/UMPS/NME7/ALDOC/CARD11/NME1/RORA/GART/AK3/TMSB4X/PFAS/MTHFD1/NDUFB7/CTPS1/APRT/MCCC2/HSPA1A/HPRT1/PRPS2/ADSL/HSPA1B/NDUFS1/NDUFS3/GIMAP7/DHODH/IMPDH1/NDUFB5/MLST8/DNM1L/UPB1/VCP/PARP1/ITPA/LRRK2/AMPD3/DGAT1/PDHB/AMPD2/N…	153
BP	GO:0106106	cold-induced thermogenesis	56/5019	147/18903	0.00139808165562961	0.0110362149457972	0.00805600267844276	IL4R/GADD45G/ALPL/LCN2/MFN2/SLC25A44/KDM1A/NR1H2/DOCK7/HADH/NR1D1/CMKLR1/IRF4/EHMT1/IL15/MAP2K6/KDM6B/ADIPOR1/ALMS1/IL18/TLE3/TFE3/G0S2/ACOT11/PGAM5/PLCL2/FH/IL18R1/ACOT13/OMA1/ZBTB7B/PLCL1/ACSL1/FABP5/PTH2R/ADIPOR2/OGT/CCR2/NPR3/CXCR4/UCP2/VEGFA/DYNC1H1/STAT6/DDIT3/TLR4/DECR1/SYK/PLAC8/CD36/GRB10/PRDM16/ALDH1A1/CAV1/IGF1R/PDGFC	56
BP	GO:0120161	regulation of cold-induced thermogenesis	56/5019	147/18903	0.00139808165562961	0.0110362149457972	0.00805600267844276	IL4R/GADD45G/ALPL/LCN2/MFN2/SLC25A44/KDM1A/NR1H2/DOCK7/HADH/NR1D1/CMKLR1/IRF4/EHMT1/IL15/MAP2K6/KDM6B/ADIPOR1/ALMS1/IL18/TLE3/TFE3/G0S2/ACOT11/PGAM5/PLCL2/FH/IL18R1/ACOT13/OMA1/ZBTB7B/PLCL1/ACSL1/FABP5/PTH2R/ADIPOR2/OGT/CCR2/NPR3/CXCR4/UCP2/VEGFA/DYNC1H1/STAT6/DDIT3/TLR4/DECR1/SYK/PLAC8/CD36/GRB10/PRDM16/ALDH1A1/CAV1/IGF1R/PDGFC	56
BP	GO:0045637	regulation of myeloid cell differentiation	77/5019	214/18903	0.00143755122234965	0.011333788552039	0.00827321970263915	MYB/IL23A/ZFP36L1/CDK6/IFNG/GPR137B/LILRB3/CAMK4/PRKDC/RARA/LILRB1/TNF/PRMT1/ETS1/CD101/LEF1/ID2/CEACAM1/PF4/ZNF675/SPI1/HSPA1A/CCR1/PAF1/HCLS1/HSPA1B/LILRB4/NEDD9/ZFP36/STAT5B/ACVR2A/EVI2B/TFE3/GPR171/PTK2B/ITPKB/LYN/LTF/GABPA/MAFB/MAPK14/TNFAIP6/TYROBP/CD4/FOXO3/FBXW7/LEO1/HAX1/NFKBIA/MYC/GATA2/CTR9/RASSF2/SLC9B2/CSF3R/ZBTB16/STAT3/NOTCH2/TRIB1/HIF1A/CCL3/TLR4/FOS/HOXA9/PRKCA/ACVR1B/PIK3R1/HOXA…	77
BP	GO:0006356	regulation of transcription by RNA polymerase I	21/5019	43/18903	0.00144166529629255	0.0113522264833677	0.00828667866704845	DEDD/SIRT7/NCL/WDR43/NOL11/HEATR1/PWP1/SMARCA4/WDR75/UBTF/MYBBP1A/UTP15/EIF2AK3/SMARCB1/DHX33/SMARCA5/SF3B1/DEK/ACTR6/DDX11/BAZ1B	21
BP	GO:0046328	regulation of JNK cascade	54/5019	141/18903	0.00146435703087932	0.0115167267594617	0.00840675739615315	TRAF1/CCR7/GADD45G/DUSP16/MYD88/IL1A/MINK1/CD27/RASGRP1/SLAMF1/TNF/PRMT1/FKTN/MBIP/GADD45B/ZMYND11/SIRPA/ZNF675/GSTP1/NOD2/EPHB1/PHLPP1/PLCB1/MAP3K11/PINK1/MMP8/PTK2B/FCGR2B/TRAF3/HMGB1/NCF1/IL1B/SDCBP/NOD1/NAIP/RASSF2/ULK4/SH3RF1/CYLD/TAOK3/TLR4/EDA2R/F2RL1/GADD45A/MAP4K4/APP/TNIK/PDCD4/DUSP10/DUSP22/PTPN22/IGF1R/TRAF5/MAP3K5	54
BP	GO:0034109	homotypic cell-cell adhesion	39/5019	95/18903	0.00146684731612058	0.0115221397288391	0.00841070865081943	BLK/ZNF703/METAP1/IL6/ABAT/PPIA/CEACAM1/FERMT3/ILK/ITGB3/CEACAM5/CD99/PRKCD/ANK3/MYH9/GP6/GP1BA/LYN/PLAUR/CCL5/IL6ST/MYL9/HSPB1/JUP/TLN1/RDX/JAK1/RAP2B/P2RY12/PLEK/PRKCA/MYL12A/SH2B3/SYK/PIK3CG/ALOX12/VCL/PTPN6/CD9	39
BP	GO:0090329	regulation of DNA-templated DNA replication	26/5019	57/18903	0.00148815367607914	0.0116751590243559	0.00852240671583456	STOML2/BLM/ZRANB3/RFC3/SSBP1/WRNIP1/POLG2/MCM3/BCL6/LIG3/MCM4/MCM6/DSCC1/GINS2/RFC4/GINS1/RFC5/MCM7/BRCA2/TIPIN/GMNN/CDC7/MCM2/PCNA/MCM5/TICRR	26
BP	GO:0000082	G1/S transition of mitotic cell cycle	88/5019	250/18903	0.00149585019757196	0.0117211595138175	0.00855598526320183	CDK6/RPL26/CDK4/APEX1/RPS6/APPL1/CUL5/PKD2/SMARCC1/PRKDC/CPSF3/RCC1/CENPJ/PLK3/BTN2A2/GPR132/ID2/E2F6/ACTL6A/SMARCA4/TRIAP1/PHF10/KHDRBS1/SMARCE1/CCND3/ANKRD17/LSM11/PLCB1/MTBP/PBRM1/WEE1/AKT1/PKD1/PIM2/SMARCA2/SMARCD3/NASP/MIR29A/CASP2/BRD7/ARID1B/SKP2/CDK2AP2/SMARCB1/USP37/GSPT1/CDKN1B/E2F3/PLK2/PLRG1/DLG1/LATS2/MYC/NACC2/MNAT1/SASS6/E2F4/RBL2/BID/RBBP8/RDX/CCND2/GFI1/TRIM71/KLF4/CDC7/ARID2/ACV…	88
BP	GO:0006875	cellular metal ion homeostasis	139/5019	420/18903	0.00155794816321588	0.0121810570789244	0.00889169239055539	CCR7/LCK/CYB561A3/STEAP4/LCN2/CD40/SLC9A1/IFNG/SLC11A1/GRINA/SLC30A4/XCL1/SLC24A4/IL1A/HFE/IBTK/CALR/PKD2/STOML2/KCTD7/AFG3L2/THADA/ATP6V0D1/CDH23/LETM1/ATP2C1/SLC24A1/KCNJ2/SLC30A5/HMOX1/SCO1/ATP2C2/PRKACA/SLC30A9/ATP6V0A2/SLC39A10/EDN1/TRPM7/GLRX3/HSP90B1/ABCB7/CCR1/IMMT/ITGB3/TMTC4/MICU1/ABL1/RASA3/FASLG/FXN/STIM2/HERPUD1/BOLA2/GP5/NTSR1/VDR/MCUR1/SLC8A1/GP1BA/ATP1B1/RAP1GDS1/PTK2B/ITPR3/SLC30…	139
BP	GO:0007163	establishment or maintenance of cell polarity	83/5019	234/18903	0.00155835231319364	0.0121810570789244	0.00889169239055539	CCR7/GATA3/SLC9A1/FLOT2/WDR1/RHOF/HES1/MYO9A/CRTAM/DOCK7/CD3G/CKAP5/SDCCAG8/CORO7/PRKCI/WDPCP/RAC2/CYTH1/ILK/GPSM1/PLEKHG3/EPHB1/ABL1/RHOG/ZW10/HSP90AB1/SPN/MYH9/CAP1/NDEL1/WEE1/PTK2B/PKD1/CCL4/ARHGEF11/ARF6/TCIRG1/RPGRIP1L/PTK7/CLASP2/RHOBTB3/FSCN1/SPDL1/ARHGAP35/MSN/GPSM2/BCAS3/MAD2L1/KRIT1/SPRY2/DLG1/NEK3/MCPH1/RHOB/RHOQ/SH3BP1/ROCK2/SLC9A3R1/UBXN2B/GOLPH3/SNX27/NPHP3/TRAF3IP2/MAP7/LIN7A/ACTR3…	83
BP	GO:0043407	negative regulation of MAP kinase activity	27/5019	60/18903	0.00156158303379553	0.0121914064933927	0.00889924705590821	DUSP16/INPP5K/SMPD1/ZNF675/GSTP1/RGS14/PRKCD/DUSP1/RGS2/PTPN1/LYN/PAQR3/PTPRJ/IL1B/SPRY2/STK38/CDK5RAP3/CD300A/SPRY3/SH2B3/NF1/PDCD4/DUSP10/SORL1/PTPN6/PTPN22/CAV1	27
BP	GO:0090150	establishment of protein localization to membrane	94/5019	270/18903	0.00156636942846435	0.0122138611287818	0.00891563805623995	MAL/ZDHHC19/INPP5K/TOMM20/MTX2/YIF1B/ATP2C1/SRP72/VPS37C/SGTB/ZDHHC18/ZDHHC21/MTX1/VAMP2/RAB8B/PRKCI/SRPRB/TIMM13/ITGB2/TIMM9/SAMM50/ZDHHC7/TOMM5/TOMM40/SRP68/SRP9/NPC1/GDI1/BCS1L/HSPA4/VPS37A/PEX3/PDCD5/CHMP4B/RABGEF1/GZMB/STX3/ANK3/EMC1/ITGAM/ATP1B1/NACA/PIKFYVE/GOPC/FYN/ZDHHC9/CSK/PREPL/GOLPH3L/GGA3/KCNE1/MAPK8/TIMM10B/NCF1/CALM3/LYPLA1/MACF1/ZDHHC12/ZDHHC3/SDCBP/ATAD1/RAB31/AGK/BLZF1/CNST/TRA…	94
BP	GO:0034982	mitochondrial protein processing	9/5019	13/18903	0.00157674492014756	0.0122499477757272	0.00894197988864138	STOML2/AFG3L2/PMPCA/IMMP2L/LRRK2/MIPEP/OMA1/PMPCB/IMMP1L	9
BP	GO:0042492	gamma-delta T cell differentiation	9/5019	13/18903	0.00157674492014756	0.0122499477757272	0.00894197988864138	TCF7/GPR18/LEF1/KLRC1/STAT5B/SOX4/EGR3/PTPRC/SYK	9
BP	GO:0070486	leukocyte aggregation	9/5019	13/18903	0.00157674492014756	0.0122499477757272	0.00894197988864138	STK10/RAC2/ZAP70/SEMA4D/IL1B/MSN/S100A8/S100A9/NR4A3	9
BP	GO:0097178	ruffle assembly	22/5019	46/18903	0.00158435039068077	0.012294097570404	0.00897420750163329	INPP5K/DEF8/PLEKHM1/ABI3/WDPCP/ICAM1/DBNL/RCC2/RHOG/EVL/FAM98A/NDEL1/ARF6/ARHGAP24/SNX10/PFN1/SH3BP1/RDX/P2RY12/CORO1C/STAP1/CAV1	22
BP	GO:0044843	cell cycle G1/S phase transition	97/5019	280/18903	0.00159310167267614	0.012342260728483	0.0090093647119987	CDK6/RPL26/CDK4/TRIM39/APEX1/RPS6/APPL1/CUL5/PKD2/SMARCC1/PRKDC/CPSF3/RCC1/CENPJ/PLK3/BTN2A2/GPR132/ID2/E2F6/ACTL6A/SMARCA4/TRIAP1/PAF1/PHF10/KHDRBS1/STXBP4/SMARCE1/CCND3/ANKRD17/LSM11/PLCB1/MTBP/MAP3K11/PBRM1/WEE1/AKT1/PKD1/PIM2/SMARCA2/SMARCD3/NASP/MIR29A/CASP2/BRD7/ARID1B/SKP2/PHB2/CDK2AP2/SMARCB1/USP37/GSPT1/CDKN1B/E2F3/PLK2/PLRG1/FBXW7/DLG1/LATS2/MYC/NACC2/MNAT1/SASS6/E2F4/RBL2/PLCG2/BID/RBB…	97
BP	GO:0072331	signal transduction by p53 class mediator	64/5019	173/18903	0.00159441779194979	0.012342260728483	0.0090093647119987	SHISA5/NPM1/RPL26/KDM1A/SESN2/RPL11/MAPKAPK5/RPS20/TAF9/MSH2/HINT1/BCL3/TRIM24/RPS7/ARMC10/SNAI1/RPF2/PLK3/SGK1/PAK1IP1/TRIAP1/MAP2K6/E2F2/CASP6/PRMT5/PPP1R13B/ZNF385A/MYBBP1A/TFAP4/MIF/SOX4/RPL37/URB2/USP10/AKT1/EEF1E1/CASP2/BATF/ATR/SMYD2/CHEK1/FOXO3/CDKN1B/PLK2/RRN3/TAF9B/HEXIM1/SP100/MYC/BRCA2/TOPORS/CDK5RAP3/RFFL/RRS1/ATAD5/MIR186/EDA2R/COPS3/ATM/CDKN1A/PYHIN1/TP53/DDIT4/MDM2	64
BP	GO:0070542	response to fatty acid	28/5019	63/18903	0.00162569083328248	0.0125539458792369	0.00916388654306447	ID3/FFAR2/CDK4/CPT1A/HES1/DGAT2/ZC3H12A/MBP/EDN1/PPP5C/FOXO1/LDLR/PLCB1/FOXO3/ACSL1/CAT/XRCC5/AKR1C3/PDK4/PTAFR/UCP2/GNPAT/PTGS2/PDK3/ALAD/CD36/TLR2/ASS1	28
BP	GO:0098781	ncRNA transcription	28/5019	63/18903	0.00162569083328248	0.0125539458792369	0.00916388654306447	ELL/DEDD/SPIN1/SIRT7/GTF3C3/NCL/RPAP2/NOL11/PWP1/GTF3C4/GTF3A/SMARCA4/GTF3C6/POLR1B/ZNF143/ZC3H8/POLR1E/GTF3C5/ANG/NPM3/SMARCB1/TAF1B/USPL1/DDX11/SNAPC3/TP53/ELL2/NFATC2	28
BP	GO:0043094	cellular metabolic compound salvage	16/5019	30/18903	0.00163489703209743	0.012579460437101	0.00918251116640697	UPP1/UCK2/ENOPH1/CDA/MTAP/APRT/HPRT1/ADSL/MRI1/AMPD3/AMPD2/ADA/PDXK/APIP/DCK/ADK	16
BP	GO:0070498	interleukin-1-mediated signaling pathway	16/5019	30/18903	0.00163489703209743	0.012579460437101	0.00918251116640697	MYD88/ZBP1/IL1RN/IL6/OTUD4/IRAK2/MAPK3/ZNF675/PLCB1/RELA/IL1B/IL1R1/IRAK4/IL1R2/EGR1/MIR27A	16
BP	GO:2000108	positive regulation of leukocyte apoptotic process	16/5019	30/18903	0.00163489703209743	0.012579460437101	0.00918251116640697	BLK/CD274/MIAT/PIK3CD/BCL2L11/ADAM8/ZC3H8/HCAR2/LYN/CCL5/IL10/PRELID1/NF1/LGALS9/P2RX7/TP53	16
BP	GO:0045342	MHC class II biosynthetic process	12/5019	20/18903	0.00165297307525714	0.0126880070146388	0.00926174589712535	IFNG/SLC11A1/XBP1/HDAC2/PF4/SPI1/RFXAP/IL10/TMEM106A/TLR4/TAF7/AZU1	12
BP	GO:1903975	regulation of glial cell migration	12/5019	20/18903	0.00165297307525714	0.0126880070146388	0.00926174589712535	CX3CR1/CCR2/NTN1/P2RY12/CCL3/RRAS2/RRAS/GPR183/NF1/CSF1/ATP1B2/STAP1	12
BP	GO:0006298	mismatch repair	19/5019	38/18903	0.0016907428838188	0.0129338976530464	0.00944123638832585	AXIN2/RNASEH2B/MSH2/PMS1/RNASEH2A/MSH6/ERCC1/ABL1/TDG/MSH5/MLH1/PMS2P1/HMGB1/PMS2/PMS2P5/MLH3/PCNA/RPA1/RNASEH2C	19
BP	GO:0072529	pyrimidine-containing compound catabolic process	19/5019	38/18903	0.0016907428838188	0.0129338976530464	0.00944123638832585	UPP1/NEIL1/CDA/DCTPP1/UNG/ALDH6A1/APOBEC3A/TDG/UPB1/DUT/TYMP/NT5C/APOBEC3B/ENTPD4/APOBEC3G/DPYD/TET2/TET1/CDADC1	19
BP	GO:0001959	regulation of cytokine-mediated signaling pathway	62/5019	167/18903	0.00169107576445836	0.0129338976530464	0.00944123638832585	ZBP1/PADI2/IL1RN/IL6/UBE2K/NR1H2/OTUD4/PTPN11/IRAK2/NLRC5/YTHDF2/CNOT7/RNF185/EDN1/ZNF675/GSTP1/HSPA1A/HSPA1B/CARD16/RABGEF1/PTPN1/METTL3/ARG1/CD300LF/ANGPT1/CCL5/OAS1/PARP9/IL1R1/MAVS/CASP1/NAIP/PTPRC/SPPL2A/TNFAIP3/CXCR4/C1QTNF4/HIF1A/RFFL/TTLL12/CYLD/LAPTM5/GFI1/TNFRSF1A/CD24/IRGM/F2RL1/TRIM6/OAS3/TRIM44/SH2B3/STAT2/SYK/IL1R2/TXK/SAMHD1/CSF1/PTPN6/PXDN/STAP1/CAV1/MIR27A	62
BP	GO:0120032	regulation of plasma membrane bounded cell projection assembly	72/5019	199/18903	0.00169976526102625	0.0129848256618899	0.00947841183096319	CCR7/MPHOSPH9/DNM2/KIT/CAPZB/MYO10/FXR1/DEF8/PLEKHM1/WAS/ABI3/LIMK2/SDCCAG8/VDAC3/SYNE2/CENPJ/MNS1/IFT140/WDPCP/CDC42EP3/RAC2/ICAM1/RCC2/KLF5/MAK/ODF2/RHOG/PRKCD/BIN3/EVL/FAM98A/NDEL1/GDI2/DYNC2LI1/TBC1D7/CDKL5/ARF6/FER/ARAP1/FSCN1/CCDC88A/ARHGAP35/RALA/AVIL/ODF2L/PLD1/DNM3/ARHGAP24/BCAS3/PFN1/NCKAP1/RHOQ/CCP110/IFT88/STAU2/CNTROB/WASF2/FNBP1L/RDX/CYLD/P2RY12/F2RL1/ACTR3/PPP1R16B/PIK3R1/CORO1C/OC…	72
BP	GO:0044000	movement in host	67/5019	183/18903	0.00171051037096095	0.013037131520747	0.00951659304989745	CR2/WWP2/CHMP7/SLAMF1/PPIA/SMPD1/VAMP8/RPSA/TNFRSF14/CHMP2A/CD55/ICAM1/GPR15/IFITM2/IFITM1/DPP4/NPC1/CHMP1A/HSPA1A/HSPA1B/ITGB3/FCN1/CHMP4B/LDLR/CR1/SELPLG/TRIM26/IFITM3/PIKFYVE/ANPEP/CHMP6/ZNF639/SCARB1/CCR5/CHMP3/HMGB1/RNASEK/TRIM21/CD4/PLSCR1/SLC7A1/TRIM38/VPS18/TRIM25/SIGLEC1/CXCR4/TRIM8/CHMP2B/PTX3/CTSB/TPCN1/INSR/RAB7A/SCARB2/TRIM6/CHMP1B/MID2/CD86/DDB1/IDE/TFRC/CBL/ARL8B/ITGB7/LGALS9/CAV1/…	67
BP	GO:0006541	glutamine metabolic process	14/5019	25/18903	0.00172088504903197	0.013037131520747	0.00951659304989745	CTPS2/MECP2/GMPS/PPAT/PFAS/NIT2/CTPS1/CAD/ASNSD1/GFPT1/GLUD1/ARHGAP11B/PHGDH/GLUL	14
BP	GO:0032816	positive regulation of natural killer cell activation	14/5019	25/18903	0.00172088504903197	0.013037131520747	0.00951659304989745	IL23A/RASGRP1/FCGR3A/IL15/BLOC1S3/STAT5B/KLRC2/IL18/TYK2/TYROBP/AP1G1/HLA-E/HLA-F/TOX	14
BP	GO:0043302	positive regulation of leukocyte degranulation	14/5019	25/18903	0.00172088504903197	0.013037131520747	0.00951659304989745	CD177/IL4R/VAMP8/FGR/ITGB2/KLRC2/ITGAM/AP1G1/SNX4/HLA-F/GATA2/PTAFR/F2RL1/SYK	14
BP	GO:1902993	positive regulation of amyloid precursor protein catabolic process	14/5019	25/18903	0.00172088504903197	0.013037131520747	0.00951659304989745	IFNG/EPHA4/GSK3A/TNF/CLU/GSAP/RELA/LYN/PICALM/ROCK2/CSNK1E/CASP3/ABCG1/IFNGR1	14
BP	GO:1903077	negative regulation of protein localization to plasma membrane	14/5019	25/18903	0.00172088504903197	0.013037131520747	0.00951659304989745	ABI3/TMBIM1/HECTD1/NUMB/GOPC/CSK/LYPLA1/PICALM/GBP1/RHOQ/PPP2R5A/PPFIA1/BCL2L1/TGFB1	14
BP	GO:1904996	positive regulation of leukocyte adhesion to vascular endothelial cell	14/5019	25/18903	0.00172088504903197	0.013037131520747	0.00951659304989745	IL6/TNF/ETS1/ALOX5/ITGB2/CHST2/GP1BA/RELA/ITGA4/SELP/PTAFR/GCNT1/FUT7/ST3GAL4	14
BP	GO:1905818	regulation of chromosome separation	44/5019	111/18903	0.00176083029810695	0.0133239632261489	0.00972596890913263	SMARCC1/ANAPC5/CDC23/ANAPC7/ACTL6A/ANAPC1/SMARCA4/CSNK2A2/CDC16/PHF10/ZWILCH/SMARCE1/ZW10/DUSP1/PBRM1/KNTC1/CSNK2A1/SMARCA2/SMARCD3/SMC2/BRD7/ARID1B/SMARCB1/PTTG2/SPDL1/PLSCR1/MAD2L1/ANAPC15/RIOK2/PCID2/TRIP13/SMC4/GEN1/BUB3/ARID2/CCNB1/BUB1/NEK6/ATM/BCL7A/CDC6/TTK/CENPF/NCAPG	44
BP	GO:0046434	organophosphate catabolic process	60/5019	161/18903	0.00179132646140906	0.0133826021708348	0.00976877303153972	INPP5K/UPP1/SMPDL3A/MTMR2/SUCLA2/SMPD1/NEIL1/HINT1/PLD2/PDE5A/DCTPP1/UNG/PLBD1/HPRT1/TDG/OCRL/LDLR/PRKCD/UPB1/VCP/SYNJ1/ITPA/PLCB1/DERA/AMPD3/PLA2G7/DUT/NTSR1/PNPLA6/PNPLA8/TYMP/PLB1/SCARB1/NT5C/ENTPD4/ADA/PLCG1/NUDT5/PLD1/ENTPD1/NUDT3/GPCPD1/NUDT12/MLYCD/PRDX6/PLCG2/SMPDL3B/DPYD/IMPA2/APOC2/PTEN/IDH1/GDPD1/NAPEPLD/ACAT1/PLBD2/PDE4B/SUCLG2/SAMHD1/ABHD12B	60
BP	GO:0006278	RNA-templated DNA biosynthetic process	32/5019	75/18903	0.00179693216424264	0.0133826021708348	0.00976877303153972	CCT2/CCT6A/CCT4/CCT8/HNRNPA1/CCT7/CCT3/MAPKAPK5/NHP2/DKC1/NAT10/POT1/MAPK3/PARN/CTC1/TINF2/HSP90AB1/HNRNPC/RAD50/CCT5/PTGES3/NAF1/ATR/TERF2/EXOSC10/MAPK1/XRCC5/TERF1/TNKS/NOP10/ATM/RPA1	32
BP	GO:0016239	positive regulation of macroautophagy	32/5019	75/18903	0.00179693216424264	0.0133826021708348	0.00976877303153972	BAG3/WDR45/SESN2/PIP4K2C/SNX18/WIPI1/MAPK3/HMOX1/SLC25A5/TOM1/NOD2/GPSM1/PIP4K2B/VDAC1/PINK1/SMCR8/ATG2A/RALB/ULK1/SNX4/C9orf72/NOD1/LARP1/PIP4K2A/BNIP3/HIF1A/OPTN/SPTLC2/IRGM/GNAI3/BNIP3L/CALCOCO2	32
BP	GO:0045661	regulation of myoblast differentiation	32/5019	75/18903	0.00179693216424264	0.0133826021708348	0.00976877303153972	ID3/TNFSF14/PPARD/ZFP36L1/FLOT2/SMARCC1/SRA1/TNF/ACTL6A/SMARCA4/TMEM182/PHF10/SMARCE1/PLCB1/XKR8/SOX4/IL18/PBRM1/SMARCA2/SMARCD3/CMTM5/BRD7/ARID1B/SMARCB1/MAPK14/CAPN3/BTG1/DDIT3/ARID2/TGFB1/CXCL9/MAP3K5	32
BP	GO:1901796	regulation of signal transduction by p53 class mediator	42/5019	105/18903	0.00180309438013632	0.0133826021708348	0.00976877303153972	NPM1/RPL26/KDM1A/RPL11/MAPKAPK5/RPS20/TAF9/TRIM24/RPS7/ARMC10/SNAI1/RPF2/PLK3/SGK1/PAK1IP1/TRIAP1/MAP2K6/PRMT5/ZNF385A/MIF/SOX4/RPL37/URB2/AKT1/EEF1E1/ATR/SMYD2/CHEK1/RRN3/TAF9B/HEXIM1/MYC/CDK5RAP3/RFFL/RRS1/ATAD5/MIR186/COPS3/ATM/PYHIN1/TP53/MDM2	42
BP	GO:0002604	regulation of dendritic cell antigen processing and presentation	8/5019	11/18903	0.00181835958851431	0.0133826021708348	0.00976877303153972	CCR7/SLC11A1/NOD2/FCGR2B/NOD1/CD68/FGL2/THBS1	8
BP	GO:0002725	negative regulation of T cell cytokine production	8/5019	11/18903	0.00181835958851431	0.0133826021708348	0.00976877303153972	XCL1/HFE/SLAMF1/TBX21/SMAD7/LILRB4/ARG1/HLA-F	8
BP	GO:0009174	pyrimidine ribonucleoside monophosphate biosynthetic process	8/5019	11/18903	0.00181835958851431	0.0133826021708348	0.00976877303153972	UPP1/UCK2/CDA/UMPS/DHODH/CMPK1/CAD/DCK	8
BP	GO:0032790	ribosome disassembly	8/5019	11/18903	0.00181835958851431	0.0133826021708348	0.00976877303153972	EIF2D/DENR/ASCC3/GFM2/MTIF2/MRRF/MTIF3/PELO	8
BP	GO:0033632	regulation of cell-cell adhesion mediated by integrin	8/5019	11/18903	0.00181835958851431	0.0133826021708348	0.00976877303153972	CD3E/SKAP1/FERMT3/DPP4/PIEZO1/ADA/CCL5/WNK1	8
BP	GO:0034115	negative regulation of heterotypic cell-cell adhesion	8/5019	11/18903	0.00181835958851431	0.0133826021708348	0.00976877303153972	IL1RN/MAPK7/MBP/MAP2K5/IL10/KLF4/WNK1/MYADM	8
BP	GO:0045472	response to ether	8/5019	11/18903	0.00181835958851431	0.0133826021708348	0.00976877303153972	CDK4/ABCB4/ZC3H12A/PLCB1/HNRNPD/PTAFR/LARP1/GOLPH3	8
BP	GO:0045628	regulation of T-helper 2 cell differentiation	8/5019	11/18903	0.00181835958851431	0.0133826021708348	0.00976877303153972	IL4R/RARA/BCL6/IL18/SOCS5/NLRP3/CD86/HLX	8
BP	GO:0051469	vesicle fusion with vacuole	8/5019	11/18903	0.00181835958851431	0.0133826021708348	0.00976877303153972	CHMP7/CHMP2A/CHMP1A/CHMP4B/CHMP6/CHMP3/CHMP2B/CHMP1B	8
BP	GO:0061763	multivesicular body-lysosome fusion	8/5019	11/18903	0.00181835958851431	0.0133826021708348	0.00976877303153972	CHMP7/CHMP2A/CHMP1A/CHMP4B/CHMP6/CHMP3/CHMP2B/CHMP1B	8
BP	GO:0070587	regulation of cell-cell adhesion involved in gastrulation	8/5019	11/18903	0.00181835958851431	0.0133826021708348	0.00976877303153972	IL1RN/MAPK7/MBP/MAP2K5/IL10/KLF4/WNK1/MYADM	8
BP	GO:0075522	IRES-dependent viral translational initiation	8/5019	11/18903	0.00181835958851431	0.0133826021708348	0.00976877303153972	EIF3D/EIF3B/EIF2D/SSB/DENR/CSDE1/EIF3A/EIF3F	8
BP	GO:0090084	negative regulation of inclusion body assembly	8/5019	11/18903	0.00181835958851431	0.0133826021708348	0.00976877303153972	DNAJB2/DNAJB1/DNAJA4/SACS/HSPA2/HSPA1A/HSPA1B/SORL1	8
BP	GO:1904869	regulation of protein localization to Cajal body	8/5019	11/18903	0.00181835958851431	0.0133826021708348	0.00976877303153972	CCT2/CCT6A/CCT4/CCT8/CCT7/CCT3/DKC1/CCT5	8
BP	GO:1904871	positive regulation of protein localization to Cajal body	8/5019	11/18903	0.00181835958851431	0.0133826021708348	0.00976877303153972	CCT2/CCT6A/CCT4/CCT8/CCT7/CCT3/DKC1/CCT5	8
BP	GO:1905668	positive regulation of protein localization to endosome	8/5019	11/18903	0.00181835958851431	0.0133826021708348	0.00976877303153972	ABHD17B/ABHD17A/MSN/ROCK2/EZR/RDX/SORL1/ABHD17C	8
BP	GO:0008630	intrinsic apoptotic signaling pathway in response to DNA damage	41/5019	102/18903	0.00182048495451557	0.0133826021708348	0.00976877303153972	SHISA5/RPL26/KDM1A/PRKDC/TAF9/MSH2/RPS3/TNF/MSH6/BCL3/HMOX1/SNAI1/BCL2L11/TNFRSF1B/TRIAP1/ABL1/ZNF385A/SOD2/MIF/CLU/RAD9A/SKIL/MLH1/CASP2/BCL2A1/TAF9B/BRCA2/NACC2/CIDEB/TOPORS/BID/BRCA1/ATAD5/TNFRSF1A/PIK3R1/ATM/BCL2L1/CDKN1A/TP53/MCL1/DDIT4	41
BP	GO:0019218	regulation of steroid metabolic process	41/5019	102/18903	0.00182048495451557	0.0133826021708348	0.00976877303153972	ADM/IFNG/LDLRAP1/POR/KIT/IL1A/EPHX2/DGAT2/TNF/ERLIN1/NR1D1/RORA/MBTPS2/SNAI1/SEC14L2/STAT5B/LDLR/IGFBP7/TTC39B/REST/DDX20/TSPO/ATP1A1/STAR/MBTPS1/AKR1C3/ERLIN2/CES1/ARMC5/NFKB1/GFI1/PRKAA1/ABCG1/DHCR7/ASAH1/INSIG1/STARD4/LPCAT3/SOD1/IGF1R/EGR1	41
BP	GO:0019827	stem cell population maintenance	65/5019	177/18903	0.00182081477256855	0.0133826021708348	0.00976877303153972	GNL3/EOMES/SAP130/KIT/WDR43/RBBP4/SMARCC1/HES1/MED15/HDAC2/KAT2A/LBH/PCM1/ACTL6A/PADI4/SMARCA4/MED27/RBBP7/SPI1/PAF1/PHF10/FOXO1/SMARCE1/BCL9L/RIF1/SOX4/LRP5/ELAVL1/MTF2/REST/METTL14/RAF1/SMARCA2/CNOT2/METTL3/SMARCB1/SMC5/FOXO3/SMC3/MED17/LEO1/BCL9/MCPH1/ZNF322/MYC/GATA2/CTR9/KDM2B/FUT10/OGT/PELO/TRIM8/STAT3/ZHX2/SS18/HESX1/KLF4/SAP30/ZFP36L2/VPS72/MED21/BCL7A/TET1/NCOA3/SMC1A	65
BP	GO:0043154	negative regulation of cysteine-type endopeptidase activity involved in apoptotic process	33/5019	78/18903	0.00182090458064221	0.0133826021708348	0.00976877303153972	TNFSF14/ADORA2A/POR/CD27/TNF/MMP9/SERPINB9/TRIAP1/CAAP1/BIRC3/CARD16/NR4A1/MAP2K5/ARRB2/AKT1/CSNK2A1/RAF1/PLAUR/RPS6KA1/IGBP1/MICAL1/NAIP/NLE1/ARL6IP1/PRDX3/VEGFA/RFFL/SH3RF1/KLF4/PTGS2/PRDX5/THBS1/HGF	33
BP	GO:0001818	negative regulation of cytokine production	124/5019	371/18903	0.00182420758822937	0.0133914848669788	0.00977525705022541	CCR7/C1QBP/LILRA4/N4BP1/IL23A/GATA3/IFNG/GPR18/SLC11A1/XCL1/C5AR2/IL6/HFE/CD274/SLAMF1/RARA/LILRA5/LILRB1/ZC3H12A/OTUD5/PIBF1/TNF/BCL3/CLEC4A/ABCD2/HMOX1/LEF1/MEFV/CMKLR1/TBX21/SMAD7/BTN2A2/NLRP12/CEACAM1/TMSB4X/TWSG1/SIRPA/GSTP1/TLR8/NOD2/C1QTNF3/LILRB4/ZFP36/CR1/CARD16/RABGEF1/HSP90AB1/BCL6/TIA1/PGLYRP1/MAP2K5/CD83/ARRB2/SOCS5/MIR128-1/MMP8/ARRB1/TSPO/LTF/PDCD1LG2/ORM1/FCGR2B/CSK/CX3CR1/ARG1/HM…	124
BP	GO:1905710	positive regulation of membrane permeability	24/5019	52/18903	0.0018306578083919	0.0134234243427268	0.00979857161082771	SLC9A1/GSK3A/SLC25A5/BCL2L11/HSPA1A/VDAC2/GZMB/PPIF/MIR29A/MAPK8/SLC35F6/BLOC1S2/MIR142/SLC25A6/ACAA2/BID/BNIP3/RHOT1/LAPTM5/GCLC/TMEM14A/JAM3/TP53/BNIP3L	24
BP	GO:0006400	tRNA modification	38/5019	93/18903	0.00185363150064686	0.0135763113575441	0.00991017311613696	DTWD1/TARBP1/TRMT61B/TYW3/THADA/METTL8/NAT10/PUS7/THUMPD2/METTL2A/TRMT11/SSB/ELP4/METTL2B/ELP2/THG1L/METTL1/TRMT13/ADAT2/ELP3/OSGEPL1/NSUN2/DUS3L/PUS10/TRIT1/OSGEP/DTWD2/ANKRD16/ELP5/TRMT10C/CDKAL1/TYW5/TRUB1/TRMT5/PUS3/TRMT1/NSUN6/WDR6	38
BP	GO:0006405	RNA export from nucleus	37/5019	90/18903	0.00185706045932468	0.0135858633603227	0.00991714570233124	NPM1/RAN/HNRNPA1/POLR2D/THOC1/XPOT/NUP133/NCBP2/NUP107/XPO5/FYTTD1/NXF1/NCBP1/SSB/NUP160/MAGOHB/THOC7/UPF1/EIF4A3/KHDRBS1/DHX9/RBM15B/NSUN2/PHAX/CASC3/NUP155/THOC2/NUP188/CPSF6/UPF2/PCID2/AGFG1/HHEX/RBM8A/IWS1/NUP88/SRSF3	37
BP	GO:0010950	positive regulation of endopeptidase activity	64/5019	174/18903	0.00187795532528831	0.0137230243998782	0.0100172678644552	LCK/EPHA4/PSMD14/RPS3/TNF/PDCD2/MEFV/NLRC4/NLRP12/NLRP1/MBP/FAM162A/BCL2L11/PDCD5/AIFM1/FASLG/CR1/VCP/BCL10/TFAP4/AKIRIN2/REST/CLEC7A/EIF2AK3/CTSH/CFLAR/LYN/FYN/CASP2/CYFIP2/HMGB1/GRAMD4/PICALM/TNFSF10/ANP32B/S100A8/CASP1/CTSD/NOD1/AIM2/MYC/NLRP3/CIDEB/ASPH/S100A9/ROCK2/STAT3/ST20/BID/LGMN/LAPTM5/NCSTN/HSPE1/FAS/DLC1/MALT1/PRELID1/SMAD3/SYK/P2RX1/PSME2/LGALS9/MAP3K5/APAF1	64
BP	GO:0000018	regulation of DNA recombination	51/5019	133/18903	0.00188917583118704	0.0137892582929337	0.0100656160003405	PPP4C/CD28/CD40/SMARCAD1/KDM1A/IL7R/SLC15A4/MSH2/THOC1/WAS/BLM/ZRANB3/MSH6/TBX21/ACTL6A/MEAF6/RUVBL1/PARP1/TP53BP1/MBTD1/BCL6/RIF1/MORF4L2/RAD50/MLH1/PARPBP/EXOSC6/CHEK1/TERF2/YEATS4/UBQLN4/APLF/UBE2B/EP400/PTPRC/FIGNL1/IL10/RBBP8/SMCHD1/ATAD5/STAT6/VPS72/KPNA2/ARID2/RUVBL2/TGFB1/TFRC/WDR48/IL27RA/RAD51AP1/TNFSF13	51
BP	GO:0002691	regulation of cellular extravasation	20/5019	41/18903	0.00189162302220121	0.0137913769714419	0.0100671625522897	ICAM1/ADAM8/CD99/PLCB1/CHST2/GP1BA/ITGA4/SELP/RIPK3/BST1/IL1R1/BCR/CCR2/PTAFR/GCNT1/FUT7/CD47/JAM3/IL27RA/ST3GAL4	20
BP	GO:0032984	protein-containing complex disassembly	85/5019	242/18903	0.00191030722418918	0.0139117362089586	0.0101550200600106	SET/ABCE1/CHMP7/WDR1/SMARCC1/VAMP8/CAPZB/SSRP1/TNF/CKAP5/ZFAND1/CHMP2A/SMARCA4/SNX14/TOM1/TBC1D25/STMN3/CHMP1A/UPF1/SUPT16H/CHMP4B/SMARCE1/VCP/SYNJ1/NAPA/GFM2/STMN1/MAP1LC3B/FLII/SMCR8/CKAP2/CHMP6/MAP1LC3B2/SMARCD3/CHMP3/GSPT2/MICAL2/SMARCB1/OGFOD1/ADD1/CLASP2/GSPT1/TRIOBP/AVIL/LIMA1/TTBK2/UBQLN4/SVIL/KATNB1/CALM1/MAP1S/MICAL1/MYC/SH3BP1/TFIP11/ASPH/DHX8/FRAT1/MID1IP1/CAMSAP2/BNIP3/CHMP2B/MCOLN1/…	85
BP	GO:1902991	regulation of amyloid precursor protein catabolic process	25/5019	55/18903	0.00193382138301378	0.0140509703670342	0.0102566555170851	IFNG/FLOT2/EPHA4/GSK3A/RTN1/TNF/CLU/GSAP/ABCA7/RELA/LYN/MIR29A/GGA3/RTN3/PICALM/FKBP1A/ROCK2/CSNK1E/CASP3/MIR186/ABCG1/IFNGR1/TMED10/PRNP/SORL1	25
BP	GO:2000107	negative regulation of leukocyte apoptotic process	25/5019	55/18903	0.00193382138301378	0.0140509703670342	0.0102566555170851	CCR7/BCL11B/IL7R/CD27/LILRB1/SLC46A2/CXCR2/BCL3/SLC39A10/NOD2/HCLS1/ST6GAL1/BCL10/BCL6/MIF/GPAM/ITPKB/ADA/CCL5/JAK3/KIFAP3/HIF1A/BCL2L1/DOCK8/IRS2	25
BP	GO:0001782	B cell homeostasis	17/5019	33/18903	0.00193883693433278	0.014071422653943	0.0102715848818108	IL7R/SASH3/BCL2L11/ABL1/BCL10/MIF/SPNS2/LYN/ADA/TNFAIP3/CASP3/HIF1A/TRAF3IP2/RC3H1/SOS2/TNFSF13B/GAPT	17
BP	GO:0010970	transport along microtubule	62/5019	168/18903	0.00199616197855289	0.0144710427334095	0.0105632918163307	BAG3/LRPPRC/UXT/FLOT2/RASGRP1/IFT74/HSPB11/AP3S2/KXD1/SYNE2/PCM1/IFT46/IFT140/WDPCP/IFT172/AP3B2/MAK/BLOC1S3/COPG2/CLUAP1/DYNC1I2/NDEL1/IFT80/ARL8A/KIF1B/DYNC2LI1/AP3M1/IFT122/SFPQ/WDR35/BICD1/TTC26/RAB21/BLOC1S5/TERF2/OPA1/IFT81/BLOC1S2/DYNLL1/MAP1S/BLOC1S1/IFT88/TTC21B/HSPB1/STAU2/RABL2B/WDR19/KIFAP3/HSBP1/HIF1A/DYNC1H1/RHOT1/RAB1A/SSX2IP/MAP1A/APP/AGTPBP1/ARL8B/SOD1/DYNC2H1/WASF1/KIF13A	62
BP	GO:0051056	regulation of small GTPase mediated signal transduction	104/5019	305/18903	0.00199851840619698	0.0144717176548397	0.0105637844824193	PLEKHG1/RASGRF2/NRG1/GPR18/MFN2/IQSEC1/DNM2/P2RY10/FGD3/RHOF/RASGRP1/VAV1/TAGAP/MYO9A/ARHGEF1/GMIP/HEG1/TIAM1/GPR65/RALGPS1/STMN3/FLOT1/ARHGAP27/SCAI/CYTH1/ARHGAP9/PLEKHG3/ABL1/RASA3/CYTH4/CDC42SE1/MYO9B/RABGEF1/ARHGAP26/BCL6/ARAP3/ARHGAP30/STMN1/GABARAP/PSD4/DEF6/RAP1GAP2/ARRB1/ITPKB/RAF1/ARHGEF11/ARF6/ARHGAP23/SIPA1L1/ALS2/ARAP1/FGD2/NET1/RASGRP4/RASA2/ARHGAP25/PREX1/ARHGAP35/FAM13B/DENND4B/ARH…	104
BP	GO:0090174	organelle membrane fusion	47/5019	121/18903	0.00205352161333625	0.0148531868729321	0.0108422420023017	CHMP7/SLAMF1/VAMP8/PLEKHM1/RAB3A/VAMP2/RAB8B/CHMP2A/TOM1/TGFBRAP1/CHMP1A/CHMP4B/PIP4K2B/DYSF/TMEM175/STX3/USO1/RAB20/PIKFYVE/CHMP6/CHMP3/STX11/GRIK5/BNIP1/VAMP1/STX6/STX10/VPS39/VPS18/PIP4K2A/CHMP2B/VPS41/ANKFY1/ANKRD27/RAB7A/CHMP1B/YIPF4/STX12/CORO1A/GNAI3/SNAP23/ARL8B/STX7/VPS8/TBC1D4/EEA1/VAV3	47
BP	GO:0007030	Golgi organization	61/5019	165/18903	0.00205719123048359	0.0148629160765109	0.010849343938108	RAB30/PI4K2A/SYNE1/DNM2/GOLGA8Q/GOLGA8R/GOLGA8O/LMAN1/GOLGA8T/ARL1/GOLGA8K/MAPK3/UBXN2A/CORO7/GOLGA8J/GOLGA8M/PLK3/TRAPPC11/HUWE1/PRMT5/GOLGA8S/ATP8B4/ZW10/CSNK1D/LRRK2/GOLGA8CP/USO1/GOLGA8DP/COG6/ATL2/HOOK1/TMED2/TMED3/GOLPH3L/CUL7/CLASP2/MAPK1/TANGO2/MAP2K1/BCAS3/BLZF1/COG5/DYM/LMAN2L/ATL3/HACE1/RAB1B/UBXN2B/GORASP2/CAMSAP2/GOLPH3/GOLGB1/OPTN/PLEKHM2/AKAP9/YIPF4/RAB1A/FBXW8/TRIP11/TMED10/DYNC2H1	61
BP	GO:0043409	negative regulation of MAPK cascade	66/5019	181/18903	0.00206823588634939	0.0149090194558264	0.0108829975910202	DUSP16/INPP5K/TNIP1/EPHA4/LEMD2/VRK3/DUSP2/PPIA/SMPD1/PRMT1/FKTN/BTN2A2/NLRP12/ZMYND11/SIRPA/ZNF675/GSTP1/PEBP1/NF2/RGS14/ABL1/LILRB4/FOXO1/PRKCD/DUSP5/DUSP1/RGS2/PINK1/TBC1D10C/ABCA7/PTPN1/LYN/CSK/PAQR3/PTPRJ/IL1B/IGBP1/SPRY2/GBP1/DLG1/STK38/MYC/PTPRC/EZR/SLC9A3R1/CDK5RAP3/CD300A/SPRY3/CYLD/TAOK3/TLR4/F2RL1/CNKSR3/MIR20A/SH2B3/PTEN/NF1/PDCD4/P2RX7/DUSP10/SORL1/PTPN6/PTPN22/CAV1/IGF1R/DUSP6	66
BP	GO:0098727	maintenance of cell number	66/5019	181/18903	0.00206823588634939	0.0149090194558264	0.0108829975910202	GNL3/EOMES/SAP130/KIT/WDR43/RBBP4/SMARCC1/HES1/MED15/HDAC2/KAT2A/LBH/PCM1/ACTL6A/PADI4/SMARCA4/MED27/RBBP7/SPI1/PAF1/PHF10/FOXO1/SMARCE1/BCL9L/RIF1/SOX4/LRP5/ELAVL1/MTF2/REST/METTL14/RAF1/SMARCA2/CNOT2/METTL3/SMARCB1/SMC5/FOXO3/SMC3/MED17/LEO1/BCL9/MCPH1/ZNF322/MYC/GATA2/CTR9/KDM2B/FUT10/OGT/PELO/TRIM8/STAT3/ZHX2/SS18/HESX1/KLF4/SAP30/ZFP36L2/VPS72/MED21/BCL7A/TET1/NCOA3/EZH2/SMC1A	66
BP	GO:0071346	cellular response to interferon-gamma	46/5019	118/18903	0.00209228470723123	0.0150243856802727	0.0109672103956554	XCL2/IFNG/SYNCRIP/XCL1/NR1H2/WAS/TNF/SLC26A6/NLRC5/IRF1/ZYX/SIRPA/EDN1/STXBP4/CCL20/FASLG/HCK/IFNGR2/RAB20/CCL4/ARG1/CCL5/PARP9/GBP1/CCL4L1/CASP1/SP100/GBP2/GBP5/JAK1/CCL3/TLR4/IRGM/IL12RB1/ACTR3/IFNGR1/CCL3L3/TXK/CD47/TLR2/ASS1/LGALS9/TP53/IRF8/CCL23/CCL1	46
BP	GO:0070918	small regulatory ncRNA processing	27/5019	61/18903	0.00210143946713279	0.0150243856802727	0.0109672103956554	IL6/TSN/DROSHA/ZC3H12A/NCBP2/TNF/NCBP1/PRKRA/PUS10/PUM2/NUP155/METTL3/RMRP/MAP2K1/TRUB1/MYCN/STAT3/AGO3/HENMT1/TRIM71/SMAD1/SMAD3/TGFB1/SRSF3/AGO4/HOXB-AS3/TP53	27
BP	GO:1904356	regulation of telomere maintenance via telomere lengthening	27/5019	61/18903	0.00210143946713279	0.0150243856802727	0.0109672103956554	CCT2/CCT6A/CCT4/CCT8/HNRNPA1/CCT7/CCT3/MAPKAPK5/DKC1/NAT10/POT1/MAPK3/PARN/CTC1/TINF2/PARP1/HNRNPC/CCT5/NAF1/ATR/TERF2/EXOSC10/MAPK1/XRCC5/TERF1/TNKS/ATM	27
BP	GO:0055076	transition metal ion homeostasis	54/5019	143/18903	0.00210968628386833	0.0150243856802727	0.0109672103956554	LCK/CYB561A3/STEAP4/LCN2/IFNG/SLC11A1/SLC30A4/HFE/ATP6V0D1/SLC30A5/HMOX1/SCO1/SLC30A9/ATP6V0A2/SLC39A10/GLRX3/ABCB7/COMMD1/BDH2/SOD2/FXN/BOLA2/FBXL5/SLC30A6/FTL/LTF/FTH1/SLC39A8/SLC25A28/PICALM/SLC30A1/SLC39A6/SLC31A2/S100A8/ACO1/MYC/IREB2/S100A9/SLC31A1/SLC25A37/HIF1A/TMC8/ISCU/FRRS1/CYBRD1/TFRC/MT1B/APP/MT1F/SOD1/NCOA4/PRNP/MT1X/EPB42	54
BP	GO:0002295	T-helper cell lineage commitment	11/5019	18/18903	0.00211243708579374	0.0150243856802727	0.0109672103956554	IL23A/IL6/LY9/IRF4/TBX21/SPN/SLAMF6/BATF/STAT3/STAT6/IL12RB1	11
BP	GO:0034138	toll-like receptor 3 signaling pathway	11/5019	18/18903	0.00211243708579374	0.0150243856802727	0.0109672103956554	TNF/FLOT1/SCIMP/OAS1/UNC93B1/TNFAIP3/F2RL1/PELI1/HAVCR2/PTPN22/CAV1	11
BP	GO:0042407	cristae formation	11/5019	18/18903	0.00211243708579374	0.0150243856802727	0.0109672103956554	APOOL/AFG3L2/LETM1/CHCHD3/SAMM50/IMMT/PINK1/OMA1/SLC25A46/DNAJC11/APOO	11
BP	GO:0043173	nucleotide salvage	11/5019	18/18903	0.00211243708579374	0.0150243856802727	0.0109672103956554	UPP1/UCK2/CDA/APRT/HPRT1/ADSL/AMPD3/AMPD2/ADA/DCK/ADK	11
BP	GO:0046040	IMP metabolic process	11/5019	18/18903	0.00211243708579374	0.0150243856802727	0.0109672103956554	PAICS/ATIC/PPAT/GART/PFAS/APRT/HPRT1/ADSL/AMPD3/AMPD2/NT5C	11
BP	GO:0046653	tetrahydrofolate metabolic process	11/5019	18/18903	0.00211243708579374	0.0150243856802727	0.0109672103956554	ATIC/MTHFD2L/MTHFR/GART/MTHFS/AASDHPPT/MTHFD1/MTHFD1L/GCH1/TYMS/MTHFD2	11
BP	GO:0048535	lymph node development	11/5019	18/18903	0.00211243708579374	0.0150243856802727	0.0109672103956554	LTB/IL7R/CXCR5/IL15/SPNS2/RIPK3/TRAF3IP2/RC3H1/TGFB1/NKX2-3/TOX	11
BP	GO:0150078	positive regulation of neuroinflammatory response	11/5019	18/18903	0.00211243708579374	0.0150243856802727	0.0109672103956554	IL6/TNF/LRRK2/IL18/MIR128-1/MMP8/IL1B/MIR142/PLCG2/CCL3/STAP1	11
BP	GO:0031503	protein-containing complex localization	65/5019	178/18903	0.00213565806707596	0.0151726640898708	0.0110754478004852	XPO1/NPM1/ABCE1/SEH1L/RAN/IFT74/LTV1/HSPB11/NDC1/KLHL21/PCM1/IFT46/SMAD7/LMNB2/IFT140/WDPCP/IFT172/NUMB/NMD3/RCC2/MDN1/MAK/ITGB3/STX3/CLUAP1/AKIRIN2/RAP1A/IFT80/DYNC2LI1/SDAD1/IFT122/SFPQ/WDR35/TTC26/ATR/RALB/TERF2/TYROBP/TNFAIP2/IFT81/ZDHHC3/DYNLL1/DNM3/ATAD1/DLG1/IPO9/RIOK2/NACC2/TERF1/IFT88/TTC21B/LSG1/STAU2/EZR/RABL2B/WDR19/RRS1/NPTN/AKAP9/NUP88/SSX2IP/ATM/STX7/LMNA/DYNC2H1	65
BP	GO:0006520	cellular amino acid metabolic process	99/5019	289/18903	0.00214498905503481	0.0151895723857022	0.0110877901911667	SLC25A44/ABAT/CTPS2/GCSH/MECP2/QDPR/BLMH/NARS2/GMPS/HIBADH/ENOPH1/ECHS1/MCCC1/FARSA/PPAT/ALDH18A1/YARS2/MTHFD2L/MTHFR/PSPH/MTAP/GART/FAH/MTHFS/AASDHPPT/MTR/PFAS/HIBCH/NIT2/MTHFD1/CTPS1/MCCC2/ALDH6A1/BCKDHB/AHCY/SEPHS1/FARSB/UPB1/ETFA/AFMID/MRI1/IVD/EARS2/PCCB/DBT/SMS/GCDH/IARS2/CSAD/AASDH/SLC7A7/FPGS/FARS2/DLD/PSAT1/SRR/BCKDK/WARS2/PCBD1/QRSL1/SLC39A8/ARG1/RIMKLB/GOT2/GGT1/APIP/CAD/AUH/ALDH5A1/GO…	99
BP	GO:0010758	regulation of macrophage chemotaxis	15/5019	28/18903	0.0021475404186229	0.0151895723857022	0.0110877901911667	CYP19A1/SLAMF1/SLAMF8/MAPK3/CMKLR1/C5/C5AR1/MIF/PTK2B/MAPK1/CCL5/CSF1R/THBS1/CSF1/STAP1	15
BP	GO:0010818	T cell chemotaxis	15/5019	28/18903	0.0021475404186229	0.0151895723857022	0.0110877901911667	TNFSF14/XCL2/CXCL16/XCL1/PIK3CD/OXSR1/CCL5/SLC12A2/CCR2/DEFA1B/CCL3/WNK1/PIK3CG/PLEC/GPR183	15
BP	GO:0051156	glucose 6-phosphate metabolic process	15/5019	28/18903	0.0021475404186229	0.0151895723857022	0.0110877901911667	HK3/G6PD/PRPS2/MLST8/DERA/RPE/PGD/G6PC3/HK1/PGLS/TKT/RBKS/HK2/TP53/PGAM1	15
BP	GO:0036293	response to decreased oxygen levels	105/5019	309/18903	0.00216422687855744	0.0152819304210867	0.0111552079230691	ADM/PPARD/ZFP36L1/EGLN2/SLC9A1/EPHA4/IL1A/ABAT/MECP2/TGFBR3/EEF2K/TNF/HMOX1/MTHFR/RORA/SUV39H2/PLK3/FAM162A/TGFBR2/EDN1/DPP4/HSP90B1/ADAM8/KCNMB1/ADSL/AHCY/AIFM1/MLST8/SOD2/CARD16/TM9SF4/AGTRAP/HILPDA/REST/ANG/PINK1/SLC8A1/AKT1/ATP1B1/PTK2B/USF1/CFLAR/CD38/CPEB4/PHB2/ADA/FOXO3/AK4/CREBBP/ITPR1/CDKN1B/FUNDC1/HP1BP3/ENO1/CAT/LIMD1/DNMT3A/MYC/CYBB/ROCK2/TMBIM6/CPEB2/CXCR4/UCP2/ACAA2/CASP3/BNIP3/HIF1…	105
BP	GO:0036503	ERAD pathway	44/5019	112/18903	0.00216537831740765	0.0152819304210867	0.0111552079230691	DNAJB2/CALR/TMUB2/XBP1/STT3B/SGTB/FAF1/UBE2G2/ERLIN1/RHBDD2/RNF185/HSP90B1/VCP/RCN3/HERPUD1/ERLEC1/ATXN3/ANKZF1/CANX/USP14/DNAJC10/RNF5/TMEM67/FAM8A1/UBXN8/USP13/AUP1/DNAJB12/DERL1/NGLY1/TRIM25/ERLIN2/YOD1/PSMC6/CCDC47/TOR1A/UBQLN2/RNFT1/EDEM3/SEC61B/SVIP/CAV1/MAN1A1/HSPA5	44
BP	GO:0043254	regulation of protein-containing complex assembly	135/5019	410/18903	0.00222821777016147	0.0157077207532484	0.0114660181123592	CCR7/TRABD2A/TCL1A/NRG1/MYD88/DRG1/IFNG/CAND1/HES1/NR1H2/MECP2/CAPZB/PTPN11/ARL2/RPS3/RAB3A/FAF1/TNF/CKAP5/MEFV/SKAP1/CDC42EP3/BCL2L11/IMPACT/TMSB4X/TGFBRAP1/DBNL/GRB2/COTL1/HSPA1A/PIEZO1/HCLS1/VDAC2/ARPC4/HSPA1B/CRBN/ABL1/MLST8/PRKCD/VCP/PARP1/ASAP1/PLEKHG2/HCK/NAPA/CLU/STMN1/FCHSD1/EVL/PREB/PINK1/FLII/CLEC7A/PTK2B/RAF1/ARF6/FER/CYFIP2/ATR/HMGB1/SSH2/ADD1/RALB/TRIOBP/FSCN1/CTTN/ULK1/PPP2R5B/VASP…	135
BP	GO:0001841	neural tube formation	42/5019	106/18903	0.00223062409195332	0.0157077207532484	0.0114660181123592	ADM/GLMN/RARA/KAT2A/MTHFR/RPS7/PRKACB/MIB1/PRKACA/IFT172/MTHFD1/HECTD1/MKS1/ABL1/BCL10/CLUAP1/SOX4/DEAF1/MTHFD1L/STK4/IFT122/TMED2/PTK7/DVL3/OPA1/ARHGAP35/RALA/VASP/PFN1/ST14/LUZP1/KDM2B/CASP3/HIF1A/NPHP3/TRIM71/SPINT1/DLC1/KIF20B/TGFB1/PTCH1/APAF1	42
BP	GO:0042073	intraciliary transport	22/5019	47/18903	0.0022397838860451	0.0157375584256839	0.0114877984392412	IFT74/HSPB11/PCM1/IFT46/IFT140/WDPCP/IFT172/MAK/CLUAP1/IFT80/DYNC2LI1/IFT122/WDR35/TTC26/IFT81/DYNLL1/IFT88/TTC21B/RABL2B/WDR19/SSX2IP/DYNC2H1	22
BP	GO:0097028	dendritic cell differentiation	22/5019	47/18903	0.0022397838860451	0.0157375584256839	0.0114877984392412	FLT3/CCR7/BLK/CAMK4/LILRB1/LILRB2/IRF4/TGFBR2/SPI1/TMEM176B/LYN/FCGR2B/BATF/HMGB1/TMEM176A/NOTCH2/HLA-B/F2RL1/PSEN1/LGALS9/IRF8/ITGB8	22
BP	GO:0045624	positive regulation of T-helper cell differentiation	13/5019	23/18903	0.00224572392978758	0.0157619745412314	0.011505621242912	MYB/IL4R/IL23A/NFKBID/RARA/IL18/SOCS5/NFKBIZ/NLRP3/MALT1/IL12RB1/CD86/HLX	13
BP	GO:0002532	production of molecular mediator involved in inflammatory response	40/5019	100/18903	0.00228529053872892	0.016004542940452	0.0116826866302231	CD6/IL4R/MYD88/RPS19/GPSM3/IL6/APPL1/VAMP8/ZC3H12A/TNF/SLAMF8/ABCD2/MEFV/ALOX5/SIRPA/NOD2/LILRB4/GRN/CLEC7A/LYN/ALOX5AP/NCF1/MAPK14/SNX4/GBP5/IL17RA/ADCY7/STAT3/HIF1A/RAB44/TLR6/TLR4/SYK/P2RX1/IL1R2/SNAP23/CD36/PDCD4/EZH2/DUSP10	40
BP	GO:0097306	cellular response to alcohol	40/5019	100/18903	0.00228529053872892	0.016004542940452	0.0116826866302231	RPLP0/CDK4/CYP1B1/BLM/ACACA/SGK1/PTGDR/KCNMB1/GNG2/AIFM1/SOD2/AKT1/FOXO3/DNMT3A/KLF2/AKR1C3/FDX1/CYBB/LARP1/JUP/ADCY7/CES1/GOLPH3/BRCA1/GNAI1/ITPR2/MLC1/ADCY6/LRP8/GRAMD1A/FOS/PRKAA1/FBP1/CTNNA1/PTCH1/ADCY3/GRAMD1B/IGF1R/INHBA/KLF9	40
BP	GO:0060491	regulation of cell projection assembly	72/5019	201/18903	0.00229164416242462	0.0160314800596751	0.0117023496673854	CCR7/MPHOSPH9/DNM2/KIT/CAPZB/MYO10/FXR1/DEF8/PLEKHM1/WAS/ABI3/LIMK2/SDCCAG8/VDAC3/SYNE2/CENPJ/MNS1/IFT140/WDPCP/CDC42EP3/RAC2/ICAM1/RCC2/KLF5/MAK/ODF2/RHOG/PRKCD/BIN3/EVL/FAM98A/NDEL1/GDI2/DYNC2LI1/TBC1D7/CDKL5/ARF6/FER/ARAP1/FSCN1/CCDC88A/ARHGAP35/RALA/AVIL/ODF2L/PLD1/DNM3/ARHGAP24/BCAS3/PFN1/NCKAP1/RHOQ/CCP110/IFT88/STAU2/CNTROB/WASF2/FNBP1L/RDX/CYLD/P2RY12/F2RL1/ACTR3/PPP1R16B/PIK3R1/CORO1C/OC…	72
BP	GO:0032200	telomere organization	67/5019	185/18903	0.0023374783143981	0.0163230444373116	0.0119151801911397	CCT2/GNL3/CCT6A/CCT4/CCT8/APEX1/HNRNPA1/CCT7/CCT3/MAPKAPK5/PRKDC/NHP2/DKC1/BLM/NAT10/POT1/MAPK3/PARN/ACTL6A/TFPT/CTC1/ERCC1/UPF1/UCHL5/YLPM1/WRN/HDAC8/RUVBL1/HAT1/EZH1/TINF2/PARP1/HSP90AB1/RIF1/HNRNPC/NSMCE4A/RAD50/CCT5/XRCC6/HNRNPD/PTGES3/NSMCE1/NAF1/ATR/TERF2/EXOSC10/SMC5/MAPK1/DCLRE1A/XRCC5/SP100/ACTR8/MYC/BRCA2/TERF1/TFIP11/TNKS/NOP10/RAD51C/DCLRE1C/FEN1/PCNA/RUVBL2/ATM/RPA1/EZH2/CCNE2	67
BP	GO:2000117	negative regulation of cysteine-type endopeptidase activity	37/5019	91/18903	0.0023401799699332	0.0163230444373116	0.0119151801911397	TNFSF14/ADORA2A/POR/CD27/TNF/MMP9/SERPINB9/TRIAP1/CAAP1/BIRC3/CARD16/NR4A1/MAP2K5/ARRB2/AKT1/CSNK2A1/RAF1/PLAUR/LTF/RPS6KA1/IGBP1/MICAL1/CAST/PCID2/NAIP/NLE1/ARL6IP1/PRDX3/VEGFA/RFFL/SH3RF1/KLF4/PTGS2/PRDX5/THBS1/HGF/CST7	37
BP	GO:0002437	inflammatory response to antigenic stimulus	33/5019	79/18903	0.00234098088035889	0.0163230444373116	0.0119151801911397	CCR7/CD6/EXT1/CD28/GATA3/IL1RN/RASGRP1/CXCR2/FGR/TNF/RHBDF2/FCGR3A/PSMA1/NOD2/AHCY/HCK/LYN/FYN/FCGR2B/HMGB1/PLCG1/MAPK14/PLK2/HLA-E/IL10/NOTCH2/RAB44/CD68/FCGR1A/FUT7/SYK/YES1/IL5RA	33
BP	GO:0018205	peptidyl-lysine modification	136/5019	414/18903	0.00236927331278279	0.0165023241415394	0.0120460473212692	WBP2/MYB/SET/GATA3/ZZZ3/GNL3/TADA2B/EOMES/UBA2/PAX5/SIRT7/KDM1A/TADA1/SUMO2/POR/ZNF335/GCSH/MECP2/HDAC2/TAF9/MSL3/KAT2A/SETMAR/PWP1/HINT1/CRTC2/PRDM5/WDR5/BMI1/JMJD6/LEF1/IRF4/SUV39H2/GTF3C4/MBIP/ACTL6A/SMYD3/EHMT1/USP22/MEAF6/SPI1/POLE3/HMG20A/SETDB2/UHRF2/TADA2A/RUVBL1/HAT1/EZH1/NCOA6/MYBBP1A/MBTD1/RIF1/MORF4L2/SOX4/METTL18/MTF2/DHPS/NSMCE4A/PIAS1/SETD1B/PIAS2/NDUFAB1/NCOA1/SUMO1P1/ARRB1/KIAA15…	136
BP	GO:0001890	placenta development	56/5019	150/18903	0.0023802280341174	0.0165277307252855	0.012064593127754	ADAM19/ADM/PPARD/ZFP36L1/DEDD/EOMES/RPS6/PKD2/HES1/JUNB/PARP2/LEF1/SNAI1/TFEB/HECTD1/GRB2/SOCS3/PARP1/MME/HSP90AB1/PRDM1/DAZAP1/NSDHL/ANG/VDR/AKT1/NCOA1/PKD1/RTCB/STK4/TMED2/ADA/CUL7/MAPK14/MAPK1/CDKN1B/MAP2K1/ST14/TRIM28/BIRC6/GATA2/IL10/NOTCH2/HIF1A/PRDX3/HS6ST1/PLK4/CTSB/PTGS2/SPINT1/FBXW8/CEBPA/BMPR2/SOD1/SPP1/ITGB8	56
BP	GO:0000959	mitochondrial RNA metabolic process	23/5019	50/18903	0.00238584539559564	0.0165277307252855	0.012064593127754	FASTKD1/LRPPRC/TRMT61B/TFB2M/FASTKD2/YARS2/PNPT1/TFAM/EARS2/GRSF1/TRNT1/TRIT1/WARS2/TFB1M/TRMT10C/FOXO3/SLIRP/DARS2/TRMT5/ELAC2/TEFM/PRKAA1/SLC25A33	23
BP	GO:0044818	mitotic G2/M transition checkpoint	23/5019	50/18903	0.00238584539559564	0.0165277307252855	0.012064593127754	TRIM39/RAD17/NAE1/FOXO4/BLM/CCNG1/RAD50/CDC14B/CHEK1/NABP1/CDK5RAP3/RBBP8/BRCA1/RINT1/BRCC3/TAOK3/ATM/CDKN1A/TOPBP1/DTL/CDC6/CLSPN/TICRR	23
BP	GO:0120009	intermembrane lipid transfer	23/5019	50/18903	0.00238584539559564	0.0165277307252855	0.012064593127754	OSBPL2/STARD5/GLTP/TRIAP1/PITPNC1/C2CD2L/TSPO/ATG2A/PITPNB/PLTP/PRELID2/STAR/OSBPL5/PLEKHA8P1/ESYT1/ABCA1/PITPNA/GRAMD1A/PRELID1/ABCG1/STARD4/NPC2/GRAMD1B	23
BP	GO:2001238	positive regulation of extrinsic apoptotic signaling pathway	23/5019	50/18903	0.00238584539559564	0.0165277307252855	0.012064593127754	DEDD2/MAL/RBCK1/FAF1/TNF/BCL10/TNFSF12/G0S2/SKIL/STK4/ITM2C/TNFSF10/PEA15/PTPRC/BID/CYLD/CTNNA1/PTEN/THBS1/NF1/PDIA3/CAV1/INHBA	23
BP	GO:0051259	protein complex oligomerization	86/5019	247/18903	0.00240160960839738	0.016618930558542	0.0121311654176737	MS4A1/STEAP4/EHD1/SLC9A1/TRMT61B/OSBPL2/TRPM6/PKD2/STOML2/KCTD7/TMEM120A/LETM1/ZNHIT6/ZC3H12A/CRTC2/BLM/FARSA/CEP57/KCNJ2/ACACA/KCTD21/PRMT1/JMJD6/PNPT1/CARD11/NLRC4/NINJ1/CHMP2A/KCTD3/NUDT21/SSBP1/NLRP1/EHD4/CBY1/TRPM7/HPRT1/CRTC3/KCNRG/SHKBP1/MICU1/TIFA/THG1L/FARSB/DNM1L/UPB1/SOD2/TP53BP1/BCL10/MIF/KCNA3/KCTD11/ELAVL1/EVL/RBMX/MAT2A/ATL2/PKD1/MLKL/STK4/PRF1/ALOX5AP/ACOT13/CRYZ/ALS2/ATL1/APIP/OP…	86
BP	GO:0046890	regulation of lipid biosynthetic process	66/5019	182/18903	0.00241621582530084	0.016701928634566	0.0121917507475208	ADM/CDK4/IFNG/POR/IL1A/NR1H2/DGAT2/PIBF1/TNF/ABCD2/ERLIN1/NR1D1/MBTPS2/SNAI1/CEACAM1/SEC14L2/LPCAT1/PRMT3/LDLR/IGFBP7/MLST8/PRKCD/SAMD8/REST/WDTC1/DDX20/AKT1/TSPO/SCARB1/LPGAT1/IL1B/ATP1A1/AVIL/FBXW7/STAR/FABP5/CNEP1R1/MBTPS1/CREBL2/AKR1C3/PDK4/ERLIN2/CES1/MID1IP1/ARMC5/NFKB1/BRCA1/ORMDL1/CHP1/GFI1/PTGS2/APOC2/PRKAA1/ABCG1/ELOVL5/DHCR7/ASAH1/INSIG1/IDH1/STARD4/LPCAT3/SOD1/RAB38/CAPN2/IGF1R/EGR1	66
BP	GO:0002761	regulation of myeloid leukocyte differentiation	47/5019	122/18903	0.00249306979763189	0.0172145661836483	0.0125659559880639	IL23A/ZFP36L1/CDK6/IFNG/GPR137B/LILRB3/CAMK4/RARA/LILRB1/TNF/CD101/LEF1/ID2/CEACAM1/PF4/ZNF675/CCR1/HCLS1/LILRB4/NEDD9/EVI2B/TFE3/LYN/LTF/MAFB/TNFAIP6/TYROBP/CD4/FBXW7/HAX1/MYC/GATA2/RASSF2/SLC9B2/NOTCH2/TRIB1/CCL3/TLR4/FOS/PRKCA/PIK3R1/HOXA7/TGFB1/NF1/TESC/CSF1/INHBA	47
BP	GO:0006383	transcription by RNA polymerase III	24/5019	53/18903	0.00251344142954215	0.0173365097092691	0.0126549699637653	ELL/GTF3C3/POLR3D/GTF3C4/GTF3A/GTF3C6/POLR3C/ZNF143/MYBBP1A/ZC3H8/POLR1C/GTF3C5/POLR3K/POLR3G/ZNF345/SMARCA5/BDP1/SF3B1/DEK/IVNS1ABP/BAZ1B/PRDX5/SNAPC3/INHBA	24
BP	GO:0006906	vesicle fusion	46/5019	119/18903	0.00254601872273205	0.0175234055039276	0.0127913965402458	CHMP7/SLAMF1/VAMP8/PLEKHM1/RAB3A/VAMP2/RAB8B/CHMP2A/TOM1/TGFBRAP1/CHMP1A/CHMP4B/PIP4K2B/DYSF/TMEM175/STX3/USO1/RAB20/PIKFYVE/CHMP6/CHMP3/STX11/GRIK5/VAMP1/STX6/STX10/VPS39/VPS18/PIP4K2A/CHMP2B/VPS41/ANKFY1/ANKRD27/RAB7A/CHMP1B/YIPF4/STX12/CORO1A/GNAI3/SNAP23/ARL8B/STX7/VPS8/TBC1D4/EEA1/VAV3	46
BP	GO:0031398	positive regulation of protein ubiquitination	46/5019	119/18903	0.00254601872273205	0.0175234055039276	0.0127913965402458	NPM1/KDM1A/GSK3A/RASSF5/UBE3A/BMI1/MTA1/SMAD7/FANCM/DCUN1D5/RPS2/UBE2V2/RNF111/HUWE1/DCUN1D4/COMMD1/NOD2/BIRC3/BCL10/LRRK2/GABARAP/AMER1/PINK1/UBE2D1/TBC1D7/SKP2/MYCBP2/CDC14B/ANGPT1/FBXW7/FKBP1A/DERL1/TOPORS/FBXO33/CDK5RAP3/BRCA1/LAPTM5/MALT1/PELI1/CBLB/PTEN/AIMP2/FANCI/PTPN22/CAV1/HSPA5	46
BP	GO:1990845	adaptive thermogenesis	59/5019	160/18903	0.00257687202560527	0.01771668788357	0.0129324850724774	IL4R/GADD45G/ALPL/LCN2/MFN2/SLC25A44/KDM1A/THADA/NR1H2/DOCK7/HADH/NR1D1/CMKLR1/IRF4/SLC25A5/EHMT1/IL15/MAP2K6/KDM6B/ADIPOR1/ALMS1/IL18/TLE3/TFE3/G0S2/ACOT11/PGAM5/PLCL2/FH/IL18R1/ACOT13/OMA1/ZBTB7B/PLCL1/ACSL1/FABP5/PTH2R/ADIPOR2/OGT/CCR2/NPR3/CXCR4/UCP2/VEGFA/DYNC1H1/STAT6/DDIT3/TLR4/DECR1/SYK/PLAC8/CD36/GRB10/PRDM16/ALDH1A1/SORL1/CAV1/IGF1R/PDGFC	59
BP	GO:0034205	amyloid-beta formation	25/5019	56/18903	0.00262322488806783	0.0180160042258923	0.0131509742254427	IFNG/EPHA4/GSK3A/RTN1/TNF/CLU/GSAP/ABCA7/RELA/BACE1/MIR29A/GGA3/RTN3/PICALM/ROCK2/CSNK1E/CASP3/NCSTN/MIR186/PSEN1/ABCG1/IFNGR1/TMED10/PRNP/SORL1	25
BP	GO:0000478	endonucleolytic cleavage involved in rRNA processing	10/5019	16/18903	0.00268281189978755	0.0183268154778222	0.0133778542101417	TSR1/RPS21/NOP14/RPP40/BMS1/UTP20/KRI1/NOL9/RCL1/RRS1	10
BP	GO:0000479	endonucleolytic cleavage of tricistronic rRNA transcript (SSU-rRNA, 5.8S rRNA, LSU-rRNA)	10/5019	16/18903	0.00268281189978755	0.0183268154778222	0.0133778542101417	TSR1/RPS21/NOP14/RPP40/BMS1/UTP20/KRI1/NOL9/RCL1/RRS1	10
BP	GO:0006555	methionine metabolic process	10/5019	16/18903	0.00268281189978755	0.0183268154778222	0.0133778542101417	ENOPH1/MTHFD2L/MTHFR/MTAP/MTR/MTHFD1/MRI1/SMS/APIP/MSRA	10
BP	GO:0031053	primary miRNA processing	10/5019	16/18903	0.00268281189978755	0.0183268154778222	0.0133778542101417	IL6/DROSHA/NCBP2/NCBP1/PUS10/METTL3/STAT3/SMAD1/SMAD3/SRSF3	10
BP	GO:0043486	histone exchange	10/5019	16/18903	0.00268281189978755	0.0183268154778222	0.0133778542101417	ACTL6A/RUVBL1/NASP/YEATS4/APLF/PCID2/ACTR6/VPS72/RUVBL2/SPTY2D1	10
BP	GO:0098813	nuclear chromosome segregation	108/5019	321/18903	0.00271829342427479	0.0185388765037073	0.013532650415264	SEH1L/PDS5A/AXIN2/RAN/SIRT7/CHMP7/SMARCC1/ANAPC5/PIBF1/TOP2B/CDC23/NDC1/CHMP2A/FANCM/CCNB1IP1/ANAPC7/ACTL6A/ANAPC1/SMARCA4/EML4/HORMAD1/CHMP1A/CDC16/RCC2/HDAC8/CHMP4B/PHF10/ZWILCH/SMARCE1/ZW10/SPICE1/DUSP1/MAU2/MSH5/PBRM1/KNTC1/MLH1/CHMP6/SMARCA2/SMARCD3/SMC2/SFPQ/CHMP3/DSCC1/BRD7/ARID1B/PHB2/STAG3L2/SMARCB1/STAG3L1/SMC5/PTTG2/STAG3L3/SPDL1/SMC3/UBE2B/FBXW7/KATNB1/MAD2L1/MIS12/MAP1S/ANAPC15/SMARC…	108
BP	GO:0044786	cell cycle DNA replication	20/5019	42/18903	0.0027196537629774	0.0185388765037073	0.013532650415264	BLM/POLA1/UPF1/WRN/MCM3/BCL6/MCM4/MCM6/TERF2/GINS1/BRCA2/TERF1/TIPIN/ATAD5/GMNN/CDC7/FEN1/CDC45/MCM2/PCNA	20
BP	GO:0061014	positive regulation of mRNA catabolic process	42/5019	107/18903	0.00274322375019253	0.0186796300944952	0.0136353949984347	ZFP36L1/PAIP1/GTPBP1/SYNCRIP/POLR2D/EXOSC2/ZC3H12A/PATL1/DIS3/TTC5/PNPT1/PARN/EXOSC8/PATL2/YTHDF2/TNRC6C/CNOT7/ZC3H12D/YBX1/KHSRP/UPF1/TOB1/ZFP36/EXOSC5/DHX9/BTG2/PAN3/HNRNPD/TARDBP/CPEB3/METTL14/MLH1/DCP1B/CNOT2/METTL3/CSDE1/POLR2G/ROCK2/EXOSC9/RC3H1/TRIM71/ZFP36L2	42
BP	GO:0043414	macromolecule methylation	116/5019	348/18903	0.00276908062584457	0.0188356399166491	0.0137492760302294	MYB/GATA3/CLNS1A/TARBP1/EOMES/TRMT61B/TFB2M/PAX5/TYW3/SIRT7/KDM1A/GSK3A/METTL5/PCIF1/ZNF335/THADA/MECP2/DIMT1/SETMAR/PWP1/METTL8/PRDM5/WDR5/BMI1/PRMT1/THUMPD2/MTHFR/METTL2A/TRMT11/SUV39H2/SNRPD1/SMYD3/EHMT1/SNRPD2/SPI1/METTL2B/METTL15/SETDB2/PRMT5/PAF1/PRMT3/METTL1/EZH1/TRMT13/NCOA6/PARP1/PRDM1/RIF1/ZDBF2/BTG2/FBL/RBM15B/SNRPE/SNRPF/NSUN2/METTL18/MTF2/ZCCHC4/SETD1B/FAM98A/SUZ12/METTL14/MBD2/PCMTD…	116
BP	GO:0051983	regulation of chromosome segregation	50/5019	132/18903	0.00279816807629713	0.0190132695853813	0.0138789386993696	SMARCC1/ANAPC5/CDC23/RAD18/ANAPC7/ACTL6A/ANAPC1/SMARCA4/CSNK2A2/HORMAD1/CDC16/RCC2/PHF10/ZWILCH/SMARCE1/ZW10/DUSP1/PBRM1/KNTC1/CSNK2A1/PUM2/SMARCA2/SMARCD3/SMC2/BRD7/ARID1B/SMARCB1/SMC5/PTTG2/SPDL1/PLSCR1/MAD2L1/ANAPC15/RIOK2/PCID2/TRIP13/SMC4/KAT2B/GEN1/BUB3/ARID2/CCNB1/BUB1/NEK6/ATM/BCL7A/CDC6/TTK/CENPF/NCAPG	50
BP	GO:0019883	antigen processing and presentation of endogenous antigen	14/5019	26/18903	0.0028238688529532	0.0191269252603631	0.013961902870199	TAPBP/HFE/TAP1/TAP2/HLA-E/HLA-F/HLA-A/HLA-B/HLA-C/CD1D/IDE/HLA-H/ERAP1/CD1C	14
BP	GO:0060333	interferon-gamma-mediated signaling pathway	14/5019	26/18903	0.0028238688529532	0.0191269252603631	0.013961902870199	IFNG/NR1H2/NLRC5/IRF1/HCK/IFNGR2/ARG1/PARP9/SP100/JAK1/IRGM/IFNGR1/TXK/TP53	14
BP	GO:1900151	regulation of nuclear-transcribed mRNA catabolic process, deadenylation-dependent decay	14/5019	26/18903	0.0028238688529532	0.0191269252603631	0.013961902870199	ZFP36L1/PAIP1/SYNCRIP/TNRC6C/CNOT7/YBX1/TOB1/ZFP36/DHX9/HNRNPD/CPEB3/CSDE1/RC3H1/ZFP36L2	14
BP	GO:0060760	positive regulation of response to cytokine stimulus	28/5019	65/18903	0.00285523665887146	0.0193189240178033	0.0141020544087285	ZBP1/UBE2K/TAF9/NLRC5/RNF185/EDN1/LRRC70/HSPA1A/HSPA1B/DHX9/CD300LF/PARP9/IL1R1/MAVS/CASP1/CXCR4/C1QTNF4/HIF1A/LAPTM5/GFI1/TLR4/IRGM/TRIM6/IFIH1/TRIM44/TXK/TLR2/CSF1	28
BP	GO:0014020	primary neural tube formation	39/5019	98/18903	0.00286552483381204	0.0193475879486739	0.0141229779504502	ADM/GLMN/RARA/KAT2A/MTHFR/RPS7/PRKACB/PRKACA/IFT172/MTHFD1/HECTD1/MKS1/ABL1/BCL10/CLUAP1/DEAF1/MTHFD1L/IFT122/TMED2/PTK7/DVL3/OPA1/ARHGAP35/RALA/VASP/PFN1/ST14/LUZP1/KDM2B/CASP3/HIF1A/NPHP3/TRIM71/SPINT1/DLC1/KIF20B/TGFB1/PTCH1/APAF1	39
BP	GO:0048661	positive regulation of smooth muscle cell proliferation	39/5019	98/18903	0.00286552483381204	0.0193475879486739	0.0141229779504502	MYD88/MFN2/LDLRAP1/IL6/TNF/MMP9/HMOX1/S1PR1/ID2/TGFBR2/EDN1/ERN1/ITGB3/ZNF143/IL18/AKT1/GNAI2/CCL5/DNMT1/MNAT1/PTAFR/IL10/IRAK4/PTGS2/TLR4/JUN/HBEGF/MMP2/MIR20A/GNAI3/TGFB1/THBS1/CYBA/NF1/MEF2D/NR4A3/IGF1R/MIR27A/MAP3K5	39
BP	GO:0031570	DNA integrity checkpoint signaling	49/5019	129/18903	0.00286946234147916	0.0193537365099343	0.0141274661582485	RPL26/EIF2AK4/TRIM39/RNASEH2B/RAD17/NAE1/PRKDC/FOXO4/MSH2/THOC1/PTPN11/SETMAR/BLM/CCNG1/TIPRL/RAD1/PLK3/INTS7/TRIAP1/ETAA1/TP53BP1/RAD9A/TTI1/CASP2/ATR/CDC14B/CHEK1/MAPK14/CDKN1B/PLK2/PRPF19/BRCA2/TIPIN/CDK5RAP3/BRCA1/RINT1/BRCC3/BRIP1/TAOK3/CDC45/ATM/CDKN1A/TOPBP1/DTL/CDC6/TP53/CLSPN/TICRR/MDM2	49
BP	GO:0032088	negative regulation of NF-kappaB transcription factor activity	38/5019	95/18903	0.00289897587794056	0.0194317638091665	0.0141844230166182	NFKBIB/CYP1B1/RBCK1/ZC3H12A/IRAK2/FAF1/BCL3/COMMD7/CMKLR1/NLRC5/NLRP12/TMSB4X/ZNF675/SPI1/COMMD1/NOD2/MAP2K5/ARRB2/ARRB1/TRAF3/TRIM21/CAT/NFKBIA/AIM2/NLRP3/TNFAIP3/IL10/CDK5RAP3/CHP1/CYLD/GFI1/KLF4/DDIT3/PELI1/HAVCR2/UFL1/CD200/MIR27A	38
BP	GO:0000288	nuclear-transcribed mRNA catabolic process, deadenylation-dependent decay	29/5019	68/18903	0.00290377582703771	0.0194317638091665	0.0141844230166182	ZFP36L1/PAIP1/SYNCRIP/POLR2D/EXOSC2/PATL1/DIS3/PARN/EXOSC8/PATL2/TNRC6C/CNOT7/YBX1/TOB1/ZFP36/EXOSC5/DHX9/BTG2/PAN3/HNRNPD/CPEB3/MLH1/DCP1B/CNOT2/CSDE1/POLR2G/EXOSC9/RC3H1/ZFP36L2	29
BP	GO:0042987	amyloid precursor protein catabolic process	29/5019	68/18903	0.00290377582703771	0.0194317638091665	0.0141844230166182	ADAM19/IFNG/FLOT2/EPHA4/GSK3A/RTN1/TNF/CLU/GSAP/ABCA7/RELA/BACE1/LYN/MIR29A/GGA3/RTN3/PICALM/FKBP1A/ROCK2/CSNK1E/CASP3/NCSTN/MIR186/PSEN1/ABCG1/IFNGR1/TMED10/PRNP/SORL1	29
BP	GO:0140014	mitotic nuclear division	109/5019	325/18903	0.00292274140814848	0.0194317638091665	0.0141844230166182	CD28/DRG1/SEH1L/PDS5A/RAN/SIRT7/CHMP7/IL1A/RPL24/SMARCC1/ANAPC5/RCC1/PIBF1/RANBP1/TNF/CDC23/CHMP2A/ANAPC7/ACTL6A/ANAPC1/SMARCA4/EML4/EDN1/CHMP1A/BCCIP/CDC16/HSPA1A/PRMT5/HSPA1B/CHMP4B/CEP85/PHF10/ZWILCH/SMARCE1/ZW10/SPICE1/DUSP1/MAU2/MTBP/LRP5/PBRM1/NDEL1/KNTC1/CHMP6/SMARCA2/SMARCD3/SMC2/CHMP3/DSCC1/BRD7/ARID1B/PHB2/SMARCB1/CUL7/CLASP2/CDC14B/CHEK1/SMC5/BORA/PTTG2/IL1B/SPDL1/SMC3/CDKN1B/KATNB1/MA…	109
BP	GO:0007095	mitotic G2 DNA damage checkpoint signaling	17/5019	34/18903	0.00292751057791645	0.0194317638091665	0.0141844230166182	TRIM39/FOXO4/BLM/CCNG1/CDC14B/CHEK1/CDK5RAP3/BRCA1/RINT1/BRCC3/TAOK3/ATM/CDKN1A/TOPBP1/DTL/CLSPN/TICRR	17
BP	GO:0034405	response to fluid shear stress	17/5019	34/18903	0.00292751057791645	0.0194317638091665	0.0141844230166182	PKD2/MAPK7/SMAD7/MAP2K5/SOCS5/AKT1/PTK2B/PKD1/KLF2/MTSS1/ABCA1/KLF4/PTGS2/MMP2/PLEC/ASS1/P2RX7	17
BP	GO:1902624	positive regulation of neutrophil migration	17/5019	34/18903	0.00292751057791645	0.0194317638091665	0.0141844230166182	CCR7/C1QBP/IL23A/XCL1/IL1A/CXCR2/RAC2/EDN1/ADAM8/C5AR1/CD99/DNM1L/DAPK2/IL1R1/MCU/MOSPD2/FUT7	17
BP	GO:0001843	neural tube closure	37/5019	92/18903	0.00292783233659093	0.0194317638091665	0.0141844230166182	ADM/GLMN/RARA/KAT2A/MTHFR/RPS7/PRKACB/PRKACA/IFT172/MTHFD1/HECTD1/MKS1/ABL1/BCL10/CLUAP1/DEAF1/MTHFD1L/IFT122/TMED2/PTK7/DVL3/OPA1/ARHGAP35/RALA/VASP/PFN1/ST14/KDM2B/CASP3/NPHP3/TRIM71/SPINT1/DLC1/KIF20B/TGFB1/PTCH1/APAF1	37
BP	GO:0009791	post-embryonic development	37/5019	92/18903	0.00292783233659093	0.0194317638091665	0.0141844230166182	GATA3/ACADM/BCL11B/CDH23/MECP2/HMGN1/RAB3A/PLEKHA1/TBCE/SLC4A10/HEG1/BCL2L11/CSRNP1/ERCC1/ABL1/SOD2/PRDM1/KDM5B/IGF2R/PLAGL2/SEMA3C/ITPR1/ALDH5A1/ACO1/IREB2/ARID5B/VEGFA/KLF4/CCDC47/MYO1E/KMT2A/PSEN1/CHST11/ATM/NKX2-3/NR4A2/SCUBE1	37
BP	GO:1904646	cellular response to amyloid-beta	21/5019	45/18903	0.00292831291287282	0.0194317638091665	0.0141844230166182	FPR2/EPHA4/TNF/BCL2L11/ICAM1/PARP1/ITGA4/BACE1/FYN/FCGR2B/LRP1/FOXO3/ABCC1/TLR6/LGMN/TLR4/PSEN1/APP/CD36/PRNP/IGF1R	21
BP	GO:0009067	aspartate family amino acid biosynthetic process	12/5019	21/18903	0.00292965597623342	0.0194317638091665	0.0141844230166182	ENOPH1/MTHFD2L/MTHFR/MTAP/AASDHPPT/MTR/MTHFD1/MRI1/GOT2/APIP/GOT1/ASNSD1	12
BP	GO:0016075	rRNA catabolic process	12/5019	21/18903	0.00292965597623342	0.0194317638091665	0.0141844230166182	DEDD2/EXOSC2/DIS3/EXOSC8/DIS3L/EXOSC5/EXOSC6/EXOSC10/ZCCHC7/EXOSC9/PELO/SLFN14	12
BP	GO:0043373	CD4-positive, alpha-beta T cell lineage commitment	12/5019	21/18903	0.00292965597623342	0.0194317638091665	0.0141844230166182	IL23A/IL6/LY9/IRF4/TBX21/SPN/SLAMF6/BATF/STAT3/STAT6/IL12RB1/TOX	12
BP	GO:0071498	cellular response to fluid shear stress	12/5019	21/18903	0.00292965597623342	0.0194317638091665	0.0141844230166182	PKD2/MAPK7/MAP2K5/SOCS5/PTK2B/KLF2/MTSS1/KLF4/PTGS2/MMP2/PLEC/ASS1	12
BP	GO:1901522	positive regulation of transcription from RNA polymerase II promoter involved in cellular response to chemical stimulus	12/5019	21/18903	0.00292965597623342	0.0194317638091665	0.0141844230166182	XBP1/CREB3/SMAD5/CHD6/CARF/RELA/RUNX2/HIF1A/VEGFA/JUN/SMAD1/TP53	12
BP	GO:2000319	regulation of T-helper 17 cell differentiation	12/5019	21/18903	0.00292965597623342	0.0194317638091665	0.0141844230166182	IL23A/NFKBID/JUNB/ZC3H12A/TBX21/SMAD7/BATF/ZBTB7B/NFKBIZ/RC3H1/MALT1/IL12RB1	12
BP	GO:0070527	platelet aggregation	30/5019	71/18903	0.0029398017175723	0.0194788520022356	0.014218795544822	BLK/METAP1/IL6/ABAT/PPIA/CEACAM1/FERMT3/ILK/ITGB3/PRKCD/MYH9/GP6/GP1BA/LYN/IL6ST/MYL9/HSPB1/TLN1/RAP2B/P2RY12/PLEK/PRKCA/MYL12A/SH2B3/SYK/PIK3CG/ALOX12/VCL/PTPN6/CD9	30
BP	GO:0034644	cellular response to UV	36/5019	89/18903	0.00295145267522808	0.0195358058027002	0.0142603695782514	MAPK13/N4BP1/NPM1/RPL26/EIF2AK4/KDM1A/SMPD1/MMP9/IMPACT/TRIAP1/ERCC1/EIF2S1/PRKCD/CARD16/PARP1/MME/ACTR5/METTL3/ATR/CHEK1/CREBBP/TIMP1/MYC/HYAL3/ST20/PTGS2/DDB2/PCNA/RUVBL2/MMP2/DDB1/PIK3R1/CDKN1A/NEDD4/MFAP4/TP53	36
BP	GO:0051298	centrosome duplication	31/5019	74/18903	0.00296441799599441	0.019601332643628	0.0143082015939032	XPO1/NPM1/PKD2/KAT2A/NAT10/CKAP5/CHMP2A/CENPJ/CHMP1A/CEP76/CHMP4B/ALMS1/SPICE1/CHMP3/TMEM67/PLK2/BRCA2/SASS6/CCP110/ROCK2/CEP192/KAT2B/CNTROB/RTTN/CHMP2B/GEN1/BRCA1/PLK4/CHMP1B/CEP152/CHORDC1	31
BP	GO:0090502	RNA phosphodiester bond hydrolysis, endonucleolytic	35/5019	86/18903	0.00296913798544921	0.0196122606187627	0.0143161785857784	APEX1/NOB1/TSR1/RPS21/POP5/DROSHA/NOP14/ZC3H12A/CPSF3/RNASEH2A/RPP40/BMS1/SND1/RPP30/ZC3H12D/ERN1/TSEN2/UTP20/ANG/KRI1/RNASEK/RMRP/NOL9/ELAC2/NYNRIN/RCL1/NUDT12/RNASEL/AGO3/RRS1/FEN1/RNASET2/ZC3H12C/SLFN14/AGO4	35
BP	GO:0061912	selective autophagy	34/5019	83/18903	0.00298012937398136	0.0196645482118027	0.0143543464713849	BAG3/MFN2/SESN2/UBA5/MAPK3/SLC25A5/HUWE1/NOD2/UFC1/VDAC1/MAP1LC3B/PINK1/GABARAPL1/ATG16L1/ATG2A/PHB2/WDFY3/RNF213/ULK1/UFM1/AUP1/NOD1/OGT/VPS13C/LRBA/OPTN/SPTLC2/GAA/RAB7A/ATG14/UFL1/TP53/CALCOCO2/ULK2	34
BP	GO:0051865	protein autoubiquitination	33/5019	80/18903	0.00298360601599706	0.0196671926456549	0.0143562768040488	WWP2/RNF157/RNF220/UBE3A/MTA1/RAD18/RNF185/HECTD1/RNF19B/UHRF2/ERCC8/LRRK2/RNF13/SASH1/RNF115/TRIM21/RNF213/UBE2B/BRCA2/UHRF1/RNF122/UBE2D3/BRCA1/BRCC3/SH3RF1/RNF141/TRIM71/RNF10/DDB2/CBL/RNFT1/UBE2T/MDM2	33
BP	GO:0061025	membrane fusion	64/5019	177/18903	0.00301067461776445	0.0198251838372666	0.0144716041575886	USE1/CHMP7/SLAMF1/VAMP8/FOLR3/PLEKHM1/RAB3A/VAMP2/UBXN2A/RAB8B/CHMP2A/HUWE1/TOM1/TGFBRAP1/DPP4/CHMP1A/CHMP4B/PIP4K2B/DYSF/DNM1L/YKT6/TMEM175/STX3/NAPA/USO1/TIE1/RAB20/PIKFYVE/CHMP6/CHMP3/STX11/GRIK5/BNIP1/GCA/VAMP1/STX6/STX10/VPS39/RABEP1/VPS18/HACE1/UBXN2B/PIP4K2A/CHMP2B/VPS41/ANKFY1/CHP1/ANKRD27/RAB7A/CHMP1B/YIPF4/STX12/CORO1A/GNAI3/SNAP23/ARL8B/STX7/FOLR2/VPS8/MYOF/TBC1D4/EEA1/CD9/VAV3	64
BP	GO:1903828	negative regulation of protein localization	72/5019	203/18903	0.0030569138982719	0.0201089582978915	0.0146787483484271	BAG3/WWP2/INPP5K/PTPN11/ABHD17B/LMAN1/ABI3/ANKRD13A/HADH/UBE2G2/PIM3/TMBIM1/RHBDF2/BTF3/POLR1A/HECTD1/SPI1/NUMB/COMMD1/GDI1/LILRB4/FOXO1/KLF7/LZTFL1/LRRK2/ERLEC1/REST/MIR128-1/GDI2/GOPC/ABHD17A/ARF6/CSK/TXN/KCNE1/LYPLA1/IL1B/NDUFAF2/ANGPT1/PICALM/TTBK2/UFM1/MIDN/GBP1/LATS2/SP100/RHOQ/TERF1/PPP2R5A/ROCK2/JAGN1/UCP2/UBXN2B/YOD1/CHP1/PPFIA1/RAB11FIP1/SNX33/BCL2L1/CTNNA1/TGFB1/MAP1A/INSIG1/NF1/CD36/S…	72
BP	GO:1902003	regulation of amyloid-beta formation	22/5019	48/18903	0.00311061806691376	0.020441204439719	0.0149212749593721	IFNG/EPHA4/GSK3A/RTN1/TNF/CLU/GSAP/ABCA7/RELA/MIR29A/GGA3/RTN3/PICALM/ROCK2/CSNK1E/CASP3/MIR186/ABCG1/IFNGR1/TMED10/PRNP/SORL1	22
BP	GO:0030004	cellular monovalent inorganic cation homeostasis	44/5019	114/18903	0.00322121111423246	0.0211462257334727	0.0154359127639757	ATP6V0C/SLC9A8/SLC9A1/SLC11A1/IL1A/KCTD7/ATP6V0D1/UBE3A/KCNJ2/SLAMF8/MAPK3/SLC26A6/SLC4A10/ATP6V0A2/FASLG/LRRK2/TMEM175/SLC9A9/TM9SF4/ATP6V0B/SLC8A1/GRN/ATP1B1/RAB20/TCIRG1/RNASEK/MAPK1/ATP6V0A1/ATP1A1/SLC12A2/ATP6V0E1/HVCN1/ATP6V1B2/PPT1/SLC9A7/CHP1/RAB7A/ATP6V1D/ATP1B3/CLCN3/RAB38/ATP1B2/ATP6AP2/CLIC4	44
BP	GO:0032259	methylation	128/5019	390/18903	0.00322760951873686	0.0211664977054395	0.0154507105058885	MYB/GATA3/CLNS1A/TARBP1/EOMES/TRMT61B/TFB2M/PAX5/TYW3/SIRT7/KDM1A/GSK3A/METTL5/PCIF1/ZNF335/THADA/MECP2/DIMT1/SETMAR/PWP1/NSUN7/METTL8/PRDM5/WDR5/BMI1/PRMT1/THUMPD2/MTHFR/MTAP/METTL2A/TRMT11/SUV39H2/SNRPD1/SMYD3/GAMT/MTR/EHMT1/SNRPD2/SPI1/METTL2B/METTL15/SETDB2/PRMT5/PAF1/PRMT3/METTL1/EZH1/TRMT13/NCOA6/PARP1/PRDM1/RIF1/ZDBF2/BTG2/FBL/RBM15B/SNRPE/SNRPF/NSUN2/METTL18/MTF2/ZCCHC4/DPH5/SETD1B/FAM98A…	128
BP	GO:0072528	pyrimidine-containing compound biosynthetic process	18/5019	37/18903	0.00326652603137372	0.021389701011055	0.0156136401368088	UPP1/UCK2/NME2/CTPS2/CDA/UMPS/NME7/NME1/DCTD/CTPS1/DHODH/DUT/CMPK1/TYMS/CAD/DCK/NME4/TPK1	18
BP	GO:0050728	negative regulation of inflammatory response	66/5019	184/18903	0.00326833560960287	0.021389701011055	0.0156136401368088	ADORA2A/PPARD/GATA3/FPR2/RPS19/CYP19A1/SIGLEC10/MAPK7/FGR/SLAMF8/RHBDF2/NR1D1/MEFV/RORA/NLRP12/ALOX5/PSMA1/SIRPA/TNFRSF1B/GSTP1/SOCS3/NOD2/C1QTNF3/ZFP36/LDLR/PRKCD/RABGEF1/HCK/PGLYRP1/SOCS5/GRN/LYN/FYN/FCGR2B/MIR181B1/ADA/PLCG1/MAPK14/TNFAIP6/AOAH/PLK2/MIR142/BCR/NLRP3/PTPRC/METRNL/TNFAIP3/IL10/NFKB1/SMPDL3B/CYLD/KLF4/TNFRSF1A/NR1D2/SMAD3/MIR20A/SYK/YES1/LPCAT3/WFDC1/HGF/SOD1/CD200/DUSP10/CST7/CD…	66
BP	GO:0018394	peptidyl-lysine acetylation	70/5019	197/18903	0.00328343230147679	0.0214665297910456	0.0156697221232893	WBP2/SET/GATA3/ZZZ3/TADA2B/EOMES/TADA1/POR/MECP2/HDAC2/TAF9/MSL3/KAT2A/CRTC2/WDR5/BMI1/LEF1/IRF4/GTF3C4/MBIP/ACTL6A/USP22/MEAF6/SPI1/POLE3/TADA2A/RUVBL1/HAT1/MYBBP1A/MBTD1/MORF4L2/SOX4/NCOA1/ARRB1/KAT6B/SUPT3H/SF3B3/MSL1/NFYB/BRD7/SMARCB1/YEATS2/CHEK1/SMC5/YEATS4/CREBBP/SF3B5/SMARCA5/EP400/BLOC1S1/BRCA2/GATA2/SF3B1/OGT/DEK/KAT2B/BRCA1/EID1/IWS1/KMT2A/BAZ1B/VPS72/PRKAA1/RUVBL2/ARID5A/ATXN7/TAF7/TR…	70
BP	GO:0016050	vesicle organization	117/5019	353/18903	0.00329123743804035	0.0214955793450766	0.0156909271547453	ATP6V0C/TRAPPC1/PI4K2A/CHMP7/VPS36/AKTIP/SLAMF1/VAMP8/VPS37C/PLEKHM1/RAB3A/AP3S2/VAMP2/RAB8B/TMEM127/CHMP2A/PRKCI/TRAPPC11/TOM1/TGFBRAP1/UBAP1/CHMP1A/AP3B2/VPS37A/CHMP4B/ZNF385A/PIP4K2B/BLOC1S3/DYSF/FASLG/SYNJ1/CSNK1D/TMEM175/STX3/USO1/PREB/ATP6V0B/TMCC1/RAB20/HOOK1/PIKFYVE/CHMP6/AP3M1/CHMP3/TMED2/STX11/GRIK5/SNX11/GOLPH3L/KCNE1/BLOC1S5/ALS2/RNASEK/SEC24A/DNM1/ATP6V0A1/PICALM/TRAPPC10/AP1G1/BLOC1…	117
BP	GO:0043410	positive regulation of MAPK cascade	159/5019	496/18903	0.00329635203037953	0.021507015185966	0.0156992748686389	TRAF1/FLT3/CCR7/GADD45G/FCRL3/NRG1/FPR2/XCL2/MYD88/CD40/EPHA4/XCL1/C5AR2/KIT/IL6/IL1A/MINK1/CD27/RASGRP1/SLAMF1/PPIA/LILRA5/ZC3H12A/PTPN11/RPS3/PDE5A/TNF/PRMT1/MAPK3/MAP2K3/PIK3R5/PRKD2/MBIP/GADD45B/MAP3K3/ICAM1/MARCO/EDN1/ERN1/SPI1/MAP2K6/ADAM8/CCR1/NOD2/C5AR1/ITGB3/CHI3L1/ABL1/CCL20/S100A12/LRRK2/PLCB1/GLIPR2/MIF/PDE6H/MAP3K11/MAP2K5/KLHDC10/RAP1A/ARRB2/MMP8/GNAI2/PTK2B/ARRB1/ABCA7/SASH1/RAF1/C…	159
BP	GO:0001666	response to hypoxia	100/5019	296/18903	0.0033087225311285	0.0215437595356778	0.0157260967981818	ADM/PPARD/ZFP36L1/EGLN2/SLC9A1/EPHA4/IL1A/ABAT/MECP2/TGFBR3/TNF/HMOX1/MTHFR/RORA/SUV39H2/PLK3/FAM162A/TGFBR2/EDN1/DPP4/HSP90B1/ADAM8/KCNMB1/ADSL/AHCY/MLST8/SOD2/CARD16/TM9SF4/AGTRAP/HILPDA/REST/ANG/PINK1/SLC8A1/ATP1B1/PTK2B/USF1/CFLAR/CD38/PHB2/ADA/FOXO3/AK4/CREBBP/ITPR1/CDKN1B/FUNDC1/HP1BP3/ENO1/CAT/LIMD1/DNMT3A/MYC/CYBB/ROCK2/TMBIM6/CPEB2/CXCR4/UCP2/ACAA2/CASP3/BNIP3/HIF1A/PLOD1/VEGFA/CD34/AQP3…	100
BP	GO:0044262	cellular carbohydrate metabolic process	100/5019	296/18903	0.0033087225311285	0.0215437595356778	0.0157260967981818	EXT1/ACADM/INPP5K/SIRT7/SESN2/PFKFB4/GSK3A/PFKFB2/MTMR2/GNPTAB/MECP2/DGAT2/PFKFB3/KAT2A/HK3/GNE/WDR5/NR1D1/PPIP5K2/PPP1R3D/RORA/SOGA1/PPP1R3B/PYGM/GK/EXT2/GALK2/ABHD10/C1QTNF3/ADIPOR1/FOXO1/B4GALT1/OCRL/NAGK/MLST8/SYNJ1/SLC35B4/GYG1/NTSR1/PPIP5K1/GABARAPL1/AKT1/PTK2B/RPE/PTGES3/STK40/IDH2/PHKB/ITPK1/BCKDK/ARPP19/SORD/DUSP12/ISYNA1/NLN/AOAH/FOXK2/GOT1/IL6ST/GYS1/MIDN/MGAM/ENOSF1/CSGALNACT1/PPP1R2/…	100
BP	GO:0035601	protein deacylation	50/5019	133/18903	0.00334575376612246	0.0217560834728975	0.0158810849182338	IFNG/ZZZ3/EOMES/SIRT7/SMARCAD1/RBBP4/SAP30BP/HDAC2/MSL3/KAT2A/ABHD17B/PRDM5/WDR5/MTA1/PRKD2/MBIP/RBBP7/TBL1XR1/HDAC8/ABHD10/TADA2A/LRRK2/SIN3B/BCL6/MORF4L2/REST/PINK1/MBD2/ABHD17A/SFPQ/ZBTB7B/MAPK8/YEATS2/LYPLA1/CAMK2D/GATAD2A/LYPLAL1/NEK3/CHD4/SMARCA5/PPT1/LYPLA2/VEGFA/BAZ2A/TBL1X/PRKAA1/GATAD2B/TP53/BEX4/ABHD17C	50
BP	GO:0010575	positive regulation of vascular endothelial growth factor production	15/5019	29/18903	0.00336592917919401	0.0217560834728975	0.0158810849182338	HPSE/IL6/IL1A/CYP1B1/RORA/C5/C5AR1/EIF2AK3/SULF2/IL1B/IL6ST/HIF1A/BRCA1/PTGS2/TGFB1	15
BP	GO:0034123	positive regulation of toll-like receptor signaling pathway	15/5019	29/18903	0.00336592917919401	0.0217560834728975	0.0158810849182338	SLC15A4/NINJ1/TLR5/TLR1/FLOT1/CD14/LTF/HMGB1/IFI35/F2RL1/PELI1/CYBA/TLR2/PTPN22/CAV1	15
BP	GO:0043101	purine-containing compound salvage	9/5019	14/18903	0.00337535733580143	0.0217560834728975	0.0158810849182338	MTAP/APRT/HPRT1/ADSL/AMPD3/AMPD2/ADA/DCK/ADK	9
BP	GO:0043374	CD8-positive, alpha-beta T cell differentiation	9/5019	14/18903	0.00337535733580143	0.0217560834728975	0.0158810849182338	GPR18/EOMES/IRF1/LILRB4/RUNX3/CBFB/TNFSF8/ZBTB7B/TOX	9
BP	GO:0043558	regulation of translational initiation in response to stress	9/5019	14/18903	0.00337535733580143	0.0217560834728975	0.0158810849182338	NPM1/EIF2AK4/PPP1R15A/IMPACT/EIF2S1/EIF2AK3/TMED2/NCK2/PPP1R15B	9
BP	GO:0048302	regulation of isotype switching to IgG isotypes	9/5019	14/18903	0.00337535733580143	0.0217560834728975	0.0158810849182338	CD28/CD40/SLC15A4/MSH2/TBX21/MLH1/PTPRC/ATAD5/IL27RA	9
BP	GO:0072540	T-helper 17 cell lineage commitment	9/5019	14/18903	0.00337535733580143	0.0217560834728975	0.0158810849182338	IL23A/IL6/LY9/IRF4/TBX21/SLAMF6/BATF/STAT3/IL12RB1	9
BP	GO:0098734	macromolecule depalmitoylation	9/5019	14/18903	0.00337535733580143	0.0217560834728975	0.0158810849182338	ABHD17B/ABHD10/ABHD17A/LYPLA1/LYPLAL1/PPT1/LYPLA2/ABHD12B/ABHD17C	9
BP	GO:1902969	mitotic DNA replication	9/5019	14/18903	0.00337535733580143	0.0217560834728975	0.0158810849182338	POLA1/MCM3/BCL6/MCM4/MCM6/GINS1/BRCA2/CDC45/MCM2	9
BP	GO:0046605	regulation of centrosome cycle	24/5019	54/18903	0.00340005195963049	0.021893184521528	0.0159811632893428	XPO1/NPM1/KAT2A/NAT10/CHMP2A/CENPJ/CHMP1A/CEP76/CHMP4B/ALMS1/SPICE1/CHMP3/TMEM67/PLK2/MCPH1/SASS6/ROCK2/KAT2B/CHMP2B/GEN1/BRCA1/PLK4/CHMP1B/CHORDC1	24
BP	GO:0010332	response to gamma radiation	25/5019	57/18903	0.003509999272434	0.0225557139175306	0.0164647836804785	RPL26/GATA3/KDM1A/IL1A/PRKDC/WRN/SOD2/PARP1/XRCC6/ATR/XRCC5/MYC/BRCA2/PTPRC/XRCC2/PRKAA1/ATM/BCL2L1/CDKN1A/CBL/CYBA/TP53/MDM2/EGR1/HSPA5	25
BP	GO:0061756	leukocyte adhesion to vascular endothelial cell	25/5019	57/18903	0.003509999272434	0.0225557139175306	0.0164647836804785	EXT1/IL6/ZDHHC21/TNF/ETS1/ALOX5/ITGB2/SELPLG/SPN/CHST2/GP1BA/RELA/ITGA4/LRG1/CX3CR1/SLC39A8/SELP/PTAFR/GCNT1/GOLPH3/KLF4/SELL/FUT7/ITGB7/ST3GAL4	25
BP	GO:0000070	mitotic sister chromatid segregation	72/5019	204/18903	0.00351687991431574	0.0225772391286494	0.0164804962376622	SEH1L/PDS5A/RAN/CHMP7/SMARCC1/ANAPC5/PIBF1/CDC23/CHMP2A/ANAPC7/ACTL6A/ANAPC1/SMARCA4/EML4/CHMP1A/CDC16/CHMP4B/PHF10/ZWILCH/SMARCE1/ZW10/DUSP1/MAU2/PBRM1/KNTC1/CHMP6/SMARCA2/SMARCD3/SMC2/CHMP3/DSCC1/BRD7/ARID1B/SMARCB1/SMC5/PTTG2/SPDL1/SMC3/KATNB1/MAD2L1/MIS12/ANAPC15/SMARCA5/RIOK2/PCID2/TRIP13/NCAPD3/SMC4/KAT2B/TTN/KPNB1/CHMP2B/TNKS/GEN1/KIF18A/BUB3/RRS1/BAZ1B/CHMP1B/ARID2/CCNB1/BUB1/NEK6/ATM/BCL…	72
BP	GO:0042063	gliogenesis	104/5019	310/18903	0.0035490753486432	0.0227610709922012	0.0166146862649886	ADORA2A/MAL/CDK6/NRG1/IFNG/EOMES/EPHA4/IL6/WDR1/HES1/MECP2/HDAC2/PTPN11/TNF/MAPK3/SYNE2/LEF1/NR1D1/ID2/PRKCI/TNFRSF1B/NF2/ILK/PRMT5/C5AR1/ABL1/LDLR/SYNJ1/SOX4/CLU/NAB1/B4GALT6/EIF2B3/AKT1/GRN/SUZ12/PTK2B/METTL14/TSPO/LYN/METTL3/MIR181B1/CSK/CX3CR1/SLC25A46/LRP1/MAPK1/IL1B/EGR2/MIR142/IL6ST/MAP2K1/PRPF19/S100A8/PRKCH/CCR2/S100A9/TTC21B/CXCR4/ORC3/STAT3/BNIP3/NTN1/NCSTN/B4GALT5/P2RY12/CCL3/RNF10/LR…	104
BP	GO:0042307	positive regulation of protein import into nucleus	19/5019	40/18903	0.00356773496520339	0.0228349322998103	0.016668602113389	BAG3/IPO5/IFNG/RAN/ZC3H12A/HCLS1/PRKCD/HSP90AB1/TARDBP/MAPK14/EFCAB7/MAVS/TRIM28/JUP/PTGS2/PSEN1/SMAD3/PIK3R1/TGFB1	19
BP	GO:1901532	regulation of hematopoietic progenitor cell differentiation	19/5019	40/18903	0.00356773496520339	0.0228349322998103	0.016668602113389	MYB/CDK6/PRKDC/RARA/HES1/PUS7/PDCD2/NUDT21/YTHDF2/SPI1/ABL1/ZFP36/METTL14/METTL3/OSM/PCID2/GATA2/SOS2/FOXC1	19
BP	GO:0045807	positive regulation of endocytosis	38/5019	96/18903	0.00358877550623781	0.0229466305868845	0.0167501374680615	LDLRAP1/DNM2/HFE/APPL1/SMPD1/EEF2K/TBC1D5/MIB1/FLOT1/CD14/SYNJ1/LRRK2/AHI1/CLU/ARRB2/ARRB1/ABCA7/BICD1/RAB21/LRP1/ANGPT1/ABCA13/ATAD1/RAB31/GATA2/PPT1/PLCG2/VEGFA/ANKFY1/INSR/F2RL1/TOR1A/CD63/SYK/CBL/CD36/NEDD4L/STAP1	38
BP	GO:0070482	response to oxygen levels	112/5019	337/18903	0.00359845575167557	0.0229855405356779	0.0167785401997261	ADM/PPARD/ZFP36L1/EGLN2/SLC9A1/EPHA4/IL1A/ABAT/ATP6V0D1/MECP2/HDAC2/TGFBR3/EEF2K/TNF/HMOX1/MTHFR/RORA/SUV39H2/PLK3/ATP6V0A2/FAM162A/TGFBR2/EDN1/DPP4/HSP90B1/ADAM8/KCNMB1/ADSL/AHCY/FOXO1/AIFM1/MLST8/SOD2/CARD16/TM9SF4/AGTRAP/HILPDA/REST/ANG/PINK1/SLC8A1/AKT1/ATP1B1/PTK2B/USF1/CFLAR/CD38/CPEB4/PHB2/ADA/FOXO3/AK4/CREBBP/ITPR1/CDKN1B/FUNDC1/HP1BP3/ENO1/CAT/LIMD1/DNMT3A/MYC/CYBB/ROCK2/TMBIM6/CPEB2/CXC…	112
BP	GO:0060606	tube closure	37/5019	93/18903	0.00363757217462543	0.0232122120604341	0.0169440014941582	ADM/GLMN/RARA/KAT2A/MTHFR/RPS7/PRKACB/PRKACA/IFT172/MTHFD1/HECTD1/MKS1/ABL1/BCL10/CLUAP1/DEAF1/MTHFD1L/IFT122/TMED2/PTK7/DVL3/OPA1/ARHGAP35/RALA/VASP/PFN1/ST14/KDM2B/CASP3/NPHP3/TRIM71/SPINT1/DLC1/KIF20B/TGFB1/PTCH1/APAF1	37
BP	GO:0001510	RNA methylation	36/5019	90/18903	0.00368104748583037	0.0234662189674969	0.0171294165421335	TARBP1/TRMT61B/TFB2M/TYW3/METTL5/PCIF1/THADA/DIMT1/METTL8/THUMPD2/METTL2A/TRMT11/SNRPD1/SNRPD2/METTL2B/METTL15/METTL1/TRMT13/FBL/RBM15B/SNRPE/SNRPF/NSUN2/ZCCHC4/METTL14/NSUN4/METTL3/TFB1M/TRMT10C/TRMT5/TRMT1/NSUN6/WDR6/SNRPD3/HENMT1/NSUN5P1	36
BP	GO:0009141	nucleoside triphosphate metabolic process	91/5019	267/18903	0.00370866442037702	0.0235866443095554	0.0172173223035689	ATP6V0C/OGDH/GTPBP1/SMPDL3A/IFNG/VPS9D1/RAN/UCK2/PFKFB2/NME2/CTPS2/STOML2/IMPDH2/OLA1/ARL2/NADK/NDUFS4/HK3/DCTPP1/NME7/ALDOC/NME1/AK3/TMSB4X/NDUFB7/CTPS1/HSPA1A/HSPA1B/NDUFS1/NDUFS3/GIMAP7/IMPDH1/NDUFB5/MLST8/DNM1L/VCP/PARP1/ITPA/LRRK2/NDUFB4/CLPX/SLC2A6/DUT/NDUFS5/CMPK1/PINK1/NDUFAB1/ATP1B1/PFKP/TSPO/AK2/NDUFA12/ENTPD4/ADA/NDUFA2/TYMS/CAD/NUDT5/AK4/OPA1/FOXK2/ENO1/NME4/RHOQ/NDUFA5/ATP6V1B2/ADK/O…	91
BP	GO:0031623	receptor internalization	46/5019	121/18903	0.00371360486236914	0.0235866443095554	0.0172173223035689	ADM/CXCR1/LDLRAP1/DNM2/MTMR2/LILRB1/CXCR2/ANKRD13A/TBC1D5/ITGB2/CEACAM1/GRB2/FLOT1/NUMB/ITGB3/LILRB4/RIN3/AHI1/ARRB2/ARRB1/ANKRD13B/FCER1G/RALB/LRP1/DNM1/ANGPT1/PICALM/RALA/DNM3/SDCBP/ATAD1/RAB31/LMBRD1/EZR/GTF2H2/PLCG2/VEGFA/INSR/CD63/UBQLN2/SYK/TFRC/CD36/NEDD4/CAV1/CD9	46
BP	GO:0036010	protein localization to endosome	13/5019	24/18903	0.00371741352689935	0.0235866443095554	0.0172173223035689	ABHD17B/AKAP11/ANKRD13A/RAB35/ABHD17A/ARF6/MSN/ROCK2/EZR/RDX/TMEM30A/SORL1/ABHD17C	13
BP	GO:1903241	U2-type prespliceosome assembly	13/5019	24/18903	0.00371741352689935	0.0235866443095554	0.0172173223035689	SNRPD1/SF3A3/SNRPD2/SF3B4/SNRPE/SNRPF/HTATSF1/SF3B3/SNRPB2/SF3B5/SF3B1/SNRPD3/SF3A1	13
BP	GO:0019915	lipid storage	35/5019	87/18903	0.00371838246231339	0.0235866443095554	0.0172173223035689	PPARD/EHD1/FFAR2/IL6/CPT1A/NR1H2/DGAT2/ZC3H12A/TNF/ITGB3/STAT5B/TTC39B/DGAT1/HILPDA/PNPLA2/SCARB1/OSBPL11/ALKBH7/IL1B/RNF213/FBXW7/AUP1/NFKBIA/CES1/NFKB1/ABCA1/ABHD5/ABCG1/HEXA/STARD4/PLIN3/CD36/SOAT1/CAV1/HEXB	35
BP	GO:0006289	nucleotide-excision repair	34/5019	84/18903	0.00374867632570734	0.0237419164453681	0.0173306648533596	GTF2H3/SMARCC1/HMGN1/FAN1/ACTL6A/RNF111/SLC30A9/SMARCA4/ERCC1/COMMD1/PHF10/SMARCE1/ERCC8/POLR2I/PBRM1/ATXN3/SMARCA2/SMARCD3/BRD7/ARID1B/SMARCB1/BRCA2/MNAT1/GTF2H2/BRIP1/DDB2/ARID2/RAD23B/DDB1/GTF2H1/BCL7A/RPA1/TP53/POLE	34
BP	GO:0007259	receptor signaling pathway via JAK-STAT	62/5019	172/18903	0.00375028708317513	0.0237419164453681	0.0173306648533596	FLT3/SOCS6/IL23A/CD40/IFNG/KIT/IL7R/IL6/CYP1B1/PKD2/HES1/HDAC2/PIBF1/PWP1/TNF/BCL3/IL10RA/CENPJ/CNOT7/IL15/SOCS3/NF2/HCLS1/ADIPOR1/ELP2/STAT5B/OCIAD1/IL18/IL10RB/PIAS1/SOCS5/CSF2RB/PTK2B/PKD1/STAT4/LYN/FYN/CSF2RA/TYK2/FER/CCL5/OSM/IL6ST/PARP9/CTR9/JAK3/PTPRC/CCR2/IL10/STAT3/CD300A/JAK1/STAT6/TNFRSF1A/IFNAR1/CSF1R/SH2B3/STAT2/GADD45A/PIGU/CAV1/NLK	62
BP	GO:0010833	telomere maintenance via telomere lengthening	33/5019	81/18903	0.00377094101412214	0.0238490572149327	0.0174088733995706	CCT2/CCT6A/CCT4/CCT8/HNRNPA1/CCT7/CCT3/MAPKAPK5/NHP2/DKC1/NAT10/POT1/MAPK3/PARN/CTC1/TINF2/PARP1/HSP90AB1/HNRNPC/RAD50/CCT5/PTGES3/NAF1/ATR/TERF2/EXOSC10/MAPK1/XRCC5/TERF1/TNKS/NOP10/ATM/RPA1	33
BP	GO:0045911	positive regulation of DNA recombination	30/5019	72/18903	0.00377827086729956	0.0238718022979381	0.0174254764152343	CD28/CD40/MSH2/WAS/TBX21/ACTL6A/MEAF6/RUVBL1/PARP1/TP53BP1/MBTD1/RIF1/MORF4L2/MLH1/EXOSC6/YEATS4/UBE2B/EP400/PTPRC/RBBP8/ATAD5/STAT6/VPS72/ARID2/RUVBL2/TGFB1/TFRC/WDR48/RAD51AP1/TNFSF13	30
BP	GO:0000028	ribosomal small subunit assembly	11/5019	19/18903	0.0038191914156347	0.0239645828376529	0.0174932025586739	RPS19/PRKDC/RPSA/RPS5/RPL38/MRPS11/ERAL1/MRPS7/XRCC5/RPS14/RPS28	11
BP	GO:0002281	macrophage activation involved in immune response	11/5019	19/18903	0.0038191914156347	0.0239645828376529	0.0174932025586739	IFNG/SBNO2/DYSF/GRN/SUCNR1/CX3CR1/TYROBP/IFI35/PLCG2/HAVCR2/SYK	11
BP	GO:0002544	chronic inflammatory response	11/5019	19/18903	0.0038191914156347	0.0239645828376529	0.0174932025586739	CYP19A1/TNF/AHCY/CCL5/S100A8/S100A9/TNFAIP3/IL10/VNN1/THBS1/UNC13D	11
BP	GO:0006098	pentose-phosphate shunt	11/5019	19/18903	0.0038191914156347	0.0239645828376529	0.0174932025586739	G6PD/PRPS2/MLST8/DERA/RPE/PGD/PGLS/TKT/RBKS/TP53/PGAM1	11
BP	GO:0043628	small regulatory ncRNA 3'-end processing	11/5019	19/18903	0.0038191914156347	0.0239645828376529	0.0174932025586739	RPS21/EXOSC2/DKC1/PARN/EXOSC8/ERI2/EXOSC5/FBL/EXOSC6/EXOSC10/EXOSC9	11
BP	GO:0045346	regulation of MHC class II biosynthetic process	11/5019	19/18903	0.0038191914156347	0.0239645828376529	0.0174932025586739	IFNG/XBP1/HDAC2/PF4/SPI1/RFXAP/IL10/TMEM106A/TLR4/TAF7/AZU1	11
BP	GO:0097284	hepatocyte apoptotic process	11/5019	19/18903	0.0038191914156347	0.0239645828376529	0.0174932025586739	CASP6/CFLAR/STK4/ARF6/DNMT3A/BID/KRT18/PRKAA1/BCL2L1/PIK3CG/IGF1R	11
BP	GO:0006739	NADP metabolic process	20/5019	43/18903	0.00383094808183377	0.0239918127551517	0.0175130793270571	NADK2/NADK/NNT/G6PD/PRPS2/MLST8/MDH1/DERA/RPE/IDH2/DCXR/PGD/NQO1/NUDT12/PGLS/TKT/RBKS/IDH1/TP53/PGAM1	20
BP	GO:0070997	neuron death	121/5019	368/18903	0.00383103547435251	0.0239918127551517	0.0175130793270571	ADORA2A/EGLN2/SET/KIR3DL2/GATA3/SLC9A1/IFNG/GSK3A/NAE1/MECP2/PARP2/MSH2/TNF/HMOX1/LANCL1/NLRP1/PRKCI/ITGB2/FAM162A/BCL2L11/G6PD/TNFRSF1B/ADAM8/TBC1D24/CTSZ/EPHB1/TMTC4/CHMP4B/ABL1/AIFM1/FASLG/EIF2S1/SOD2/PARP1/HSP90AB1/LRRK2/DNAJC5/BTG2/CLU/MAP3K11/REST/ARRB2/ITGAM/PINK1/AKT1/GRN/PTK2B/BACE1/FYN/PLXND1/CASP2/FCGR2B/CPEB4/CX3CR1/GRIK5/SRPK2/ITGA1/TYROBP/FOXO3/ANGPT1/CCL5/PICALM/KMO/IL6ST/FBXW7/HLA…	121
BP	GO:0032770	positive regulation of monooxygenase activity	16/5019	32/18903	0.00385984565107368	0.0241485842396919	0.0176275163424253	IFNG/POR/TNF/VDR/AKT1/PTK2B/FCER2/GCH1/SCARB1/CALM3/TERF2/IL1B/NOD1/NPR3/HIF1A/NUS1	16
BP	GO:0098732	macromolecule deacylation	51/5019	137/18903	0.00386948717104153	0.0241852404414854	0.017654273927456	IFNG/ZZZ3/EOMES/SIRT7/SMARCAD1/RBBP4/SAP30BP/HDAC2/MSL3/KAT2A/ABHD17B/PRDM5/WDR5/MTA1/PRKD2/MBIP/RBBP7/TBL1XR1/HDAC8/ABHD10/TADA2A/LRRK2/SIN3B/BCL6/MORF4L2/REST/PINK1/MBD2/ABHD17A/SFPQ/ZBTB7B/MAPK8/YEATS2/LYPLA1/CAMK2D/GATAD2A/LYPLAL1/NEK3/CHD4/SMARCA5/PPT1/LYPLA2/VEGFA/BAZ2A/TBL1X/PRKAA1/GATAD2B/TP53/BEX4/ABHD12B/ABHD17C	51
BP	GO:0051098	regulation of binding	122/5019	372/18903	0.00407213887251162	0.0254270077644915	0.0185607152145523	BLK/DNAJB2/EIF3E/GATA3/IFNG/RAN/EPHA4/KDM1A/LDLRAP1/EIF3D/RPL11/HFE/AKTIP/RARA/HES1/HDAC2/CSNK2B/NUCKS1/RNF220/ZNF618/TGFBR3/EDF1/MMP9/BCL3/MAPK3/HMOX1/LEF1/NME1/IRF4/NCBP1/GTPBP4/EIF3C/TIAM1/PRKACA/TMSB4X/ZNF675/FLOT1/NMD3/EIF4A3/BTBD1/GPSM1/CTSZ/ABL1/TDG/EIF2S1/PRKCD/CARD16/PARP1/DAZAP2/LFNG/TFAP4/HSP90AB1/LRRK2/DHX9/GZMA/STMN1/NVL/ARRB2/MMP8/AKT1/PKD1/PLCL2/IFIT2/MBD2/TCF7L2/ITGA4/STK4/PLAUR/S…	122
BP	GO:0016064	immunoglobulin mediated immune response	75/5019	215/18903	0.00412942597901533	0.0257268122515791	0.0187795606939897	IL21R/HLA-DOB/CR2/C1QBP/IL4R/CD28/MYD88/CD40/CD40LG/XCL1/SLC15A4/CD27/MSH2/THOC1/TNF/MSH6/BCL3/TBX21/UNG/CR1L/FCGR3A/CD55/C5/ERCC1/TLR8/NOD2/CD226/PRKCD/CR1/TP53BP1/BCL10/BCL6/RIF1/CLU/CSF2RB/MLH1/FCER2/EXOSC6/FCGR2B/BATF/CD19/TCIRG1/FCER1G/IGHM/IGHV2-26/CCR6/APLF/HLA-E/PTPRC/IL10/IGHV4-39/TRAF3IP2/ATAD5/STAT6/FCGR1A/C1RL/TGFB1/TFRC/IGLL1/IGHV4-59/IL27RA/IGHV4-34/IGHV2-5/PTPN6/IGHV2-70/IGHV4-31/I…	75
BP	GO:0006983	ER overload response	8/5019	12/18903	0.00418452998774512	0.0257268122515791	0.0187795606939897	BCL2L11/EIF2AK3/PPP1R15B/TMCO1/CCDC47/DDIT3/TP53/HSPA5	8
BP	GO:0008298	intracellular mRNA localization	8/5019	12/18903	0.00418452998774512	0.0257268122515791	0.0187795606939897	ZFP36L1/HNRNPAB/ZNF385A/ZFP36/CASC3/FUBP3/BICD1/STAU2	8
BP	GO:0009086	methionine biosynthetic process	8/5019	12/18903	0.00418452998774512	0.0257268122515791	0.0187795606939897	ENOPH1/MTHFD2L/MTHFR/MTAP/MTR/MTHFD1/MRI1/APIP	8
BP	GO:0014051	gamma-aminobutyric acid secretion	8/5019	12/18903	0.00418452998774512	0.0257268122515791	0.0187795606939897	ABAT/GABBR1/NTSR1/SV2A/CACNB4/NF1/TRH/P2RX7	8
BP	GO:0032817	regulation of natural killer cell proliferation	8/5019	12/18903	0.00418452998774512	0.0257268122515791	0.0187795606939897	IL23A/FCGR3A/IL15/STAT5B/IL18/TYK2/HLA-E/PTPN22	8
BP	GO:0032957	inositol trisphosphate metabolic process	8/5019	12/18903	0.00418452998774512	0.0257268122515791	0.0187795606939897	PLCB1/PTK2B/ITPKB/IPMK/ITPK1/PTAFR/PLCG2/P2RY1	8
BP	GO:0034154	toll-like receptor 7 signaling pathway	8/5019	12/18903	0.00418452998774512	0.0257268122515791	0.0187795606939897	LILRA4/SLC15A4/SCIMP/PIK3AP1/UNC93B1/TLR7/HAVCR2/PTPN22	8
BP	GO:0061795	Golgi lumen acidification	8/5019	12/18903	0.00418452998774512	0.0257268122515791	0.0187795606939897	ATP6V0C/UBE3A/ATP6V0A2/ATP6V0B/RNASEK/SLC9A7/ATP6V1D/ATP6AP2	8
BP	GO:0070586	cell-cell adhesion involved in gastrulation	8/5019	12/18903	0.00418452998774512	0.0257268122515791	0.0187795606939897	IL1RN/MAPK7/MBP/MAP2K5/IL10/KLF4/WNK1/MYADM	8
BP	GO:0097576	vacuole fusion	8/5019	12/18903	0.00418452998774512	0.0257268122515791	0.0187795606939897	CHMP7/CHMP2A/CHMP1A/CHMP4B/CHMP6/CHMP3/CHMP2B/CHMP1B	8
BP	GO:1902065	response to L-glutamate	8/5019	12/18903	0.00418452998774512	0.0257268122515791	0.0187795606939897	TAF9/AIFM1/FYN/TMBIM6/PCNA/BCL11A/UFL1/IGF1R	8
BP	GO:1903238	positive regulation of leukocyte tethering or rolling	8/5019	12/18903	0.00418452998774512	0.0257268122515791	0.0187795606939897	CHST2/GP1BA/ITGA4/SELP/PTAFR/GCNT1/FUT7/ST3GAL4	8
BP	GO:1903405	protein localization to nuclear body	8/5019	12/18903	0.00418452998774512	0.0257268122515791	0.0187795606939897	CCT2/CCT6A/CCT4/CCT8/CCT7/CCT3/DKC1/CCT5	8
BP	GO:1904867	protein localization to Cajal body	8/5019	12/18903	0.00418452998774512	0.0257268122515791	0.0187795606939897	CCT2/CCT6A/CCT4/CCT8/CCT7/CCT3/DKC1/CCT5	8
BP	GO:2000508	regulation of dendritic cell chemotaxis	8/5019	12/18903	0.00418452998774512	0.0257268122515791	0.0187795606939897	CCR7/C1QBP/CALR/SLAMF1/SLAMF8/SPI1/CCR6/LGALS9	8
BP	GO:0007596	blood coagulation	78/5019	225/18903	0.00420392638601949	0.0257852864245377	0.018822244539519	BLK/ADORA2A/LCK/CD40/CD40LG/F5/TEC/THBD/METAP1/HPSE/IL6/ABAT/VAV1/PPIA/DGKA/SERPINA1/LMAN1/WAS/AK3/TREML1/CEACAM1/PF4/FERMT3/EDN1/PF4V1/ILK/ITGB3/BLOC1S3/PRKCD/GP5/MYH9/GP6/GP1BA/TFPI/USF1/ANXA5/LYN/PLAUR/ITPK1/FCER1G/MAPK14/CYP4F2/PLSCR1/SELP/ENTPD1/IL6ST/MYL9/HSPB1/PLCG2/TLN1/CD34/RAP2B/P2RY12/TLR4/PLEK/F2RL1/HPS4/PRKCA/CD59/MYL12A/SH2B3/PROS1/GNAQ/SYK/P2RX1/THBS1/TXK/PIK3CG/P2RY1/CD36/ALOX12/V…	78
[truncated: 548 more rows]
