# Supplementary material for: Prognostic role of chemokine-related genes in acute myeloid leukemia
Source: PeerJ journal article supplement (doi:10.7717/peerj.17862), 2024-08-09
Supplement: TableS1.docx [file TableS1.docx]

Supplementary Table S1：List of human chemokines

| **Human chemokines** | |
| --- | --- |
| **Chemokine ligands** | |
| CXC subfamily | CXCL1 CXCL2 CXCL3 CXCL4 CXCL4L1 CXCL5 CXCL6 CXCL7 CXCL8 CXCL9 CXCL10 CXCL11 CXCL12 CXCL13 CXCL14 CXCL16 CXCL17 |
| CC subfamily | CCL1 CCL2 CCL3 CCL3L3 CCL4 CCL4L1 CCL5 CCL7 CCL8 CCL11 CCL13 CCL14 CCL15 CCL16 CCL17 CCL18 CCL19 CCL20 CCL21 CCL22 CCL23 CCL24 CCL25 CCL26 CCL27 CCL28 |
| XC subfamily | XCL1 XCL2 |
| CX3C subfamily | CX3CL1 |
| **Chemokine receptors** | |
| CXCR subfamily | CXCR1 CXCR2 CXCR3 CXCR4 CXCR5 CXCR6 |
| CCR subfamily | CCR1 CCR2 CCR3 CCR4 CCR5 CCR6 CCR7 CCR8 CCR9 CCR10 |
| XCR subfamily | XCR1 |
| CX3CR subfamily | CX3CR1 |
| Atypical | ACKR1 ACKR2 ACKR3 ACKR4 ACKR5 |
