# Supplementary material for: Prognostic role of chemokine-related genes in acute myeloid leukemia
Source: PeerJ journal article supplement (doi:10.7717/peerj.17862), 2024-08-09
Supplement: TableS2.docx [file TableS2.docx]

**Supplementary Table 2 RT-qPCR-related primer sequences**

| **primer** | **sequence** | |
| --- | --- | --- |
| CCL4 F | AAGTCTGTGCTGATCCCAGTG | |
| CCL4 R | GAGAAGGGACAGGAACTGCG | |
| CCL20 F | GGGTTGGAGGTTTCACTTGC |
| CCL20 R | ATTGGACAAGTCCAGTGAGGC |
| CCR2 F | AGAGGCATAGGGCAGTGAGA |
| CCR2 R | TGAAAAAGGCTTCTGAACTTCTCC |
| CXCR2 F | TTCCTGGGTACAGTGCTATTC |
| CXCR2 R | TAAATCCTGACTGGGTCGCTG |
| CXCR3 F | CTTTTCGCCCTCCCAGACTT |
| CXCR3 R | ATGTGGGCATAGCAGTAGGC |
| CXCR6 F | GTCAGGACTCAAAGTCAGCG |
| CXCR6 R | GAACACATCCGTCAGGCTCT |
| internal reference -GAPDH F | CGAAGGTGGAGTCAACGGATTT |
| internal reference -GAPDH R | ATGGGTGGAATCATATTGGAAC |
